# Supplementary material for: Local tissue mechanics control cardiac pacemaker cell embryonic patterning
Source: Life Sci Alliance. 2023 Mar 27;6(6):e202201799. doi: 10.26508/lsa.202201799 (PMC10043993; doi:10.26508/lsa.202201799)
Supplement: Supplementary file 3 [file LSA-2022-01799_TableS1.xlsx]

## Sheet: SEQ DATA (ALL)
GENE ID	GENE NAME	chromosome	baseMean	log2FoldChange (SAN/AT)	lfcSE	pvalue
ENSGALG00000012550	HMOX1	1	711.269	0.9183	0.331416	0.00559132
ENSGALG00000016736	CYFIP1	1	7415.69	0.0285581	0.157165	0.855812
ENSGALG00000028818	gga-mir-6641	1	7.56926	-0.483654	0.916555	0.597716
ENSGALG00000023576	PIM3	1	734.91	0.498274	0.228861	0.0294662
ENSGALG00000015006	MAB21L3	1	91.8344	0.0833994	0.320961	0.794985
ENSGALG00000017145	MPHOSPH8	1	1243.32	0.0336469	0.172272	0.845149
ENSGALG00000008554	IL17REL	1	6.07023	1.80093	1.08492	0.0969211
ENSGALG00000015016	SLC22A15	1	114.208	0.00980751	0.372607	0.979001
ENSGALG00000052027		1	49.3752	1.45295	0.484827	0.00272798
ENSGALG00000012552	TOM1	1	1297.63	-0.0898124	0.150164	0.549776
ENSGALG00000016737	NIPA2	1	2302.64	-0.00632737	0.1395	0.963822
ENSGALG00000040038	MLC1	1	0.865066	0.0188333	2.67849	0.99439
ENSGALG00000034473	PARP4	1	2469.94	0.308224	0.164906	0.0616098
ENSGALG00000039811	NIPA1	1	937.686	0.116307	0.210737	0.581012
ENSGALG00000044768		1	705.368	-0.0526199	0.175463	0.764259
ENSGALG00000052369		1	182.705	-0.00678281	0.213281	0.97463
ENSGALG00000053879		1	0	NA	NA	NA
ENSGALG00000012559	LARGE1	1	1127.13	-0.32536	0.338607	0.336614
ENSGALG00000033432	NHLH2	1	1.00128	2.19524	2.67051	0.41106
ENSGALG00000017148	CENPJ	1	452.501	-0.271321	0.212353	0.201358
ENSGALG00000026482		1	77.1567	-0.0986677	0.288315	0.732184
ENSGALG00000015018	CASQ2	1	6458.02	-0.61518	0.216733	0.00453368
ENSGALG00000016739	HERC2	1	6918.24	-0.081657	0.384323	0.83174
ENSGALG00000045414		1	3.59447	0.567591	1.39443	0.683978
ENSGALG00000033589	SYN3	1	16.2957	-0.402417	0.557622	0.4705
ENSGALG00000055067		1	28.0485	1.40742	0.644105	0.0288825
ENSGALG00000026507	FDX1	1	1410.03	-0.377337	0.153269	0.0138189
ENSGALG00000028627	TIMP3	1	1437.33	-0.439143	0.159388	0.00586598
ENSGALG00000017153	RDX	1	12008.1	-0.436459	0.174511	0.0123828
ENSGALG00000015025	VANGL1	1	287.73	-0.0177269	0.338328	0.958213
ENSGALG00000015038	CHD1L	1	929.634	-0.245063	0.189804	0.196656
ENSGALG00000012569	FBXO7	1	2548.01	0.00919547	0.156765	0.953225
ENSGALG00000015059		1	1684.96	-0.336451	0.189916	0.076465
ENSGALG00000025426		1	0	NA	NA	NA
ENSGALG00000017154	ZC3H12C	1	361.153	-0.801175	0.372825	0.0316401
ENSGALG00000017155	C11orf87	1	47.4212	2.0714	0.39316	1.37466e-07
ENSGALG00000039479	BPIFC	1	2.72347	-0.815466	1.34135	0.543226
ENSGALG00000017156	DDX10	1	2090.83	-0.0313494	0.18428	0.864918
ENSGALG00000015073	TMEM39A	1	1186.73	0.287365	0.173623	0.0979019
ENSGALG00000012611	RTCB	1	4184.42	-0.229256	0.196952	0.244417
ENSGALG00000015069	B4GALT4	1	896.449	0.174227	0.153641	0.256799
ENSGALG00000019304		1	0.668763	-0.0493963	2.60209	0.984854
ENSGALG00000022891		1	1695.51	-0.850833	0.244814	0.000510053
ENSGALG00000012619	PRDM4	1	818.215	0.0505464	0.264269	0.848315
ENSGALG00000017158	POGLUT3	1	1707.99	-0.340267	0.142004	0.0165668
ENSGALG00000012631	PWP1	1	2647.68	-0.323672	0.192249	0.0922562
ENSGALG00000033664	MOV10L1	1	75.4344	3.04592	0.567142	7.84518e-08
ENSGALG00000015075	B3GAT1L	1	833.498	2.39535	0.285443	4.79258e-17
ENSGALG00000017159	ATM	1	1991.44	-0.118109	0.258391	0.647605
ENSGALG00000015077	ARHGAP31	1	4563.17	0.102594	0.38477	0.789749
ENSGALG00000026358	gga-mir-3539	1	0.0991028	-1.11334	4.06938	0.784401
ENSGALG00000000003	PANX2	1	156.683	0.599776	0.224802	0.00763
ENSGALG00000015079	UPK1B	1	44.0891	2.16339	0.523802	3.62485e-05
ENSGALG00000030705	TRABD	1	1671.25	-0.116214	0.161531	0.471864
ENSGALG00000039595	BTBD11	1	1835.07	-0.461467	0.251414	0.0664339
ENSGALG00000016740	OCA2	1	4.47075	2.46655	1.3446	0.0665914
ENSGALG00000017162		1	775.706	-0.165351	0.249333	0.507219
ENSGALG00000012638	CRY1	1	3407.09	-0.103242	0.15182	0.496484
ENSGALG00000017163	ACAT1	1	11480.6	-0.924916	0.202174	4.76545e-06
ENSGALG00000019240		1	9.98921	0.996881	0.927563	0.282495
ENSGALG00000041042	GABRG3	1	178.667	0.250734	0.406212	0.537071
ENSGALG00000017165	CUL5	1	2997.23	-0.523754	0.21726	0.0159208
ENSGALG00000015084	IGSF11	1	1013.02	0.545051	0.312999	0.0816167
ENSGALG00000025578	gga-mir-1805	1	0	NA	NA	NA
ENSGALG00000050721		1	0	NA	NA	NA
ENSGALG00000016744	GABRA5	1	35.0381	2.11966	0.523511	5.14503e-05
ENSGALG00000038467	SELENOO	1	713.24	-0.40974	0.459454	0.372501
ENSGALG00000032156	TUBGCP6	1	782.785	-0.0341846	0.161031	0.831884
ENSGALG00000017166	RAB39A	1	10.3389	0.23263	0.759277	0.759312
ENSGALG00000017167	SLC35F2	1	86.4444	-0.400398	0.300671	0.182965
ENSGALG00000029392	GABRB3	1	83.4722	1.31302	0.417854	0.00167629
ENSGALG00000051879		1	0.201763	-1.33585	4.06242	0.742283
ENSGALG00000052522		1	2.69178	-1.47169	1.32905	0.268153
ENSGALG00000040620	LSAMP	1	837.276	-0.582305	0.284513	0.0406904
ENSGALG00000012639	MTERF2	1	184.401	-0.76743	0.224358	0.000624945
ENSGALG00000017168	SLN	1	2502.54	3.31864	0.314941	5.81267e-26
ENSGALG00000012640	TMEM263	1	4806.02	0.371393	0.138278	0.00723464
ENSGALG00000043118	ATP10A	1	706.6	-0.907827	0.247051	0.000238176
ENSGALG00000017169	ELMOD1	1	1167.77	1.43637	0.272564	1.36554e-07
ENSGALG00000051829		1	60.6163	0.412057	0.423889	0.331008
ENSGALG00000029484	RIC8B	1	1622.03	-0.000806221	0.158655	0.995946
ENSGALG00000034944	UBE3A	1	3630.34	-0.197866	0.144582	0.171144
ENSGALG00000051043		1	239.231	0.305523	0.233927	0.191532
ENSGALG00000012647	RFX4	1	0.735795	2.84463	3.2473	0.381032
ENSGALG00000041251	HDAC10	1	305.842	0.450953	0.225646	0.0456629
ENSGALG00000008635		1	0.135651	0.789056	4.07366	0.846413
ENSGALG00000039826	CNGA3	1	50.1951	-0.650833	0.405163	0.108197
ENSGALG00000012655	POLR3B	1	2409.32	-0.37169	0.25768	0.149176
ENSGALG00000019384	MAPK12	1	392.916	0.215759	0.176251	0.220891
ENSGALG00000017170	ALKBH8	1	413.207	0.352729	0.219639	0.108285
ENSGALG00000040709		1	5.3279	0.867701	1.04443	0.406093
ENSGALG00000028743		1	0	NA	NA	NA
ENSGALG00000049637		1	0.135651	0.789056	4.07366	0.846413
ENSGALG00000040023	MAPK11	1	667.283	0.719993	0.173157	3.21011e-05
ENSGALG00000015089	GAP43	1	1022.77	-1.14376	0.340364	0.000778326
ENSGALG00000042690	5S_rRNA	1	0.100757	0.710792	4.07651	0.86158
ENSGALG00000053594		1	1.24319	0.516641	2.02856	0.798968
ENSGALG00000039861	PLXNB2	1	3494.31	-0.114856	0.317595	0.717619
ENSGALG00000053188		1	8.42045	1.07713	0.826199	0.192332
ENSGALG00000049074		1	0	NA	NA	NA
ENSGALG00000015094	ZBTB20	1	23.5294	1.26582	0.832587	0.128424
ENSGALG00000015117	DRD3	1	98.5828	1.39306	0.334591	3.13453e-05
ENSGALG00000037353	TMEM131	1	5090.59	0.0695066	0.238093	0.77034
ENSGALG00000012658	TCP11X2	1	2910.92	0.210089	0.333872	0.529185
ENSGALG00000017171	CWF19L2	1	1049.05	0.150297	0.203261	0.459645
ENSGALG00000017172	VMO1	1	0.26714	0.789056	4.07366	0.846413
ENSGALG00000017173	GUCY1A2	1	27.5339	1.13191	0.57763	0.0500451
ENSGALG00000037485	QTRT2	1	1796.14	0.000508218	0.200839	0.997981
ENSGALG00000025213	gga-mir-1709	1	0	NA	NA	NA
ENSGALG00000027981	AASDHPPT	1	225.491	0.196033	0.254183	0.440572
ENSGALG00000053464	CCDC191	1	409.976	-0.211694	0.202167	0.295042
ENSGALG00000033997	ZNF800	1	510.398	-0.280525	0.187876	0.135402
ENSGALG00000028658	KBTBD3	1	55.9083	-0.51743	0.345335	0.134045
ENSGALG00000015123	ZDHHC23	1	426.859	-0.36756	0.321614	0.253096
ENSGALG00000017177	MSANTD4	1	1960.47	-0.0389724	0.150073	0.795103
ENSGALG00000012659	CKAP4	1	7038.13	0.136818	0.154796	0.376772
ENSGALG00000039403	GRM8	1	41.8981	2.27244	0.433138	1.55056e-07
ENSGALG00000029709	INPP4A	1	1483.29	-0.561715	0.186403	0.00258299
ENSGALG00000012662	NUAK1	1	486.616	-0.32402	0.253033	0.200353
ENSGALG00000025697	U1	1	0	NA	NA	NA
ENSGALG00000049783		1	0.100757	0.710792	4.07651	0.86158
ENSGALG00000026311	C12orf75	1	1022.72	0.441482	0.158927	0.00547126
ENSGALG00000038995	GRIA4	1	12.9186	1.03183	0.640199	0.107019
ENSGALG00000035629	GRAMD1C	1	1686.87	0.646581	0.154431	2.82841e-05
ENSGALG00000008740	POT1	1	881.203	0.145423	0.161952	0.369218
ENSGALG00000036791	COA5	1	2565.4	-0.164827	0.178175	0.354922
ENSGALG00000027122	APPL2	1	1769.76	0.0747	0.157104	0.634445
ENSGALG00000036076	UNC50	1	824.82	-0.0128093	0.258587	0.960493
ENSGALG00000030780	MGAT4A	1	193.079	-0.0700532	0.256573	0.784827
ENSGALG00000052687	gga-mir-12210	1	0.0991028	-1.11334	4.06938	0.784401
ENSGALG00000028254	WASHC4	1	1336.98	-0.114724	0.151696	0.449482
ENSGALG00000012691	ALDH1L2	1	7263.82	-2.0731	0.272834	2.99867e-14
ENSGALG00000051066		1	0	NA	NA	NA
ENSGALG00000048078		1	0.0991028	-1.11334	4.06938	0.784401
ENSGALG00000040954	GPR37	1	70.3422	2.69622	0.35152	1.7176e-14
ENSGALG00000054902		1	0.403526	-2.26485	4.02736	0.573867
ENSGALG00000017179	PDGFD	1	3561.84	0.518511	0.260612	0.0466364
ENSGALG00000031527	ARL8BL	1	1860.24	-0.713304	0.197168	0.000297186
ENSGALG00000016755	CRACDL	1	60.4963	0.815678	0.456398	0.073904
ENSGALG00000012694		1	1430.56	-0.0510624	0.23718	0.829542
ENSGALG00000016757	TSGA10	1	7.54516	-1.35596	0.913948	0.137909
ENSGALG00000012697	SLC41A2	1	580.118	0.510136	0.174199	0.00340641
ENSGALG00000008761	SPAM1	1	0.737382	-1.86042	2.76382	0.500861
ENSGALG00000016758	LIPT1	1	569.148	-0.491959	0.218932	0.0246346
ENSGALG00000016760		1	1249.25	-0.223916	0.239268	0.349357
ENSGALG00000008776	HYAL6	1	7.85233	0.441675	0.946558	0.640778
ENSGALG00000030607	CHST11	1	260.382	0.38016	0.213095	0.0744248
ENSGALG00000041814	DYNC2H1	1	1345.34	0.359583	0.294645	0.222316
ENSGALG00000054571		1	117.481	-0.0531226	0.265084	0.841168
ENSGALG00000008797	WASL	1	3840.04	-0.249354	0.140442	0.0758164
ENSGALG00000016759	MITD1	1	487.206	0.188836	0.212646	0.374523
ENSGALG00000043257		1	230.82	0.232902	0.218951	0.287458
ENSGALG00000008805	LMOD2	1	6560.12	-0.0977422	0.163955	0.551072
ENSGALG00000016761	LYG2	1	20.6754	0.393768	0.837815	0.63836
ENSGALG00000008814	ASB15	1	67.9451	-0.217389	0.31261	0.486806
ENSGALG00000008821	NDUFA5	1	5712.11	-0.430376	0.181397	0.0176651
ENSGALG00000035345	TXNRD1	1	409.114	0.256757	0.176407	0.145536
ENSGALG00000008823	IQUB	1	104.695	-0.0122439	0.26541	0.963205
ENSGALG00000054968		1	2.29966	0.0465224	1.61502	0.977019
ENSGALG00000008836	ATP6AP1	1	3252.97	-0.654904	0.185923	0.000427584
ENSGALG00000046548		1	1.34965	-0.528114	2.85377	0.853184
ENSGALG00000032090	TXNDC9	1	3012.05	-0.109873	0.246038	0.655185
ENSGALG00000041193	NFYB	1	2402.81	-0.0266629	0.145437	0.85454
ENSGALG00000016764	EIF5B	1	11328.2	-0.196015	0.19542	0.315839
ENSGALG00000008874	SLC13A1	1	0.700834	-3.07681	3.21532	0.338607
ENSGALG00000016766	REV1	1	1033.68	-0.0497913	0.155004	0.74804
ENSGALG00000019233		1	5.254	1.49045	1.16605	0.201177
ENSGALG00000008926	CADPS2	1	730.534	-0.0640764	0.26967	0.812184
ENSGALG00000039538	CLDND1	1	3285.28	0.199519	0.145435	0.170102
ENSGALG00000038027	gga-mir-7449	1	0	NA	NA	NA
ENSGALG00000017181	DCUN1D5	1	1188.3	-0.227526	0.233241	0.329314
ENSGALG00000016767	AFF3	1	334.584	0.4782	0.268353	0.0747518
ENSGALG00000015133	GPR15	1	0.973542	0.505738	2.17927	0.816485
ENSGALG00000025192		1	0.504035	0.649983	3.74525	0.86222
ENSGALG00000015134	APOV1	1	0	NA	NA	NA
ENSGALG00000016768	LONRF2	1	1012.63	-0.24561	0.265744	0.355363
ENSGALG00000037273		1	15.739	-0.178987	0.628744	0.775894
ENSGALG00000008941	FEZF1	1	0.403526	-2.26485	4.02736	0.573867
ENSGALG00000015136	ILDR1	1	73.6602	0.233005	0.354114	0.510541
ENSGALG00000017183	MMP13	1	3.11934	2.79575	2.00685	0.163589
ENSGALG00000028049	gga-mir-6559	1	0.698683	-0.354835	3.33788	0.91534
ENSGALG00000008953	AASS	1	1620.38	-0.212597	0.269369	0.429971
ENSGALG00000042577	CFAP44	1	43.8179	0.759448	0.385527	0.0488507
ENSGALG00000016769	CHST10	1	1174.3	0.0720477	0.176028	0.682323
ENSGALG00000040114	PTPRZ1	1	91.1591	2.39739	0.329154	3.25288e-13
ENSGALG00000054317		1	263.081	1.23175	0.373439	0.000972375
ENSGALG00000019063	MMP10	1	0.982863	-0.887898	2.62896	0.735561
ENSGALG00000050027	NMS	1	3.30552	-0.713014	1.17658	0.544512
ENSGALG00000016770		1	0	NA	NA	NA
ENSGALG00000015152	BOC	1	1111.37	1.2009	0.368584	0.00112148
ENSGALG00000016771		1	0.372059	1.95961	4.0167	0.625646
ENSGALG00000015172		1	3.94337	0.623384	1.07184	0.560835
ENSGALG00000016772	PDCL3	1	4047.23	-0.17206	0.231889	0.458091
ENSGALG00000026297		1	2.11104	3.17155	1.88602	0.0926446
ENSGALG00000019061	MMP1	1	2.08281	2.39309	1.65631	0.148506
ENSGALG00000016774	NPAS2	1	421.931	0.490187	0.380715	0.197905
ENSGALG00000019060	MMP27	1	5.85499	4.87583	1.45432	0.000800423
ENSGALG00000015182	NEPRO	1	238.307	0.242979	0.220996	0.271561
ENSGALG00000015185	TAF13	1	2270.13	-0.0203535	0.223478	0.927432
ENSGALG00000015190	GTPBP8	1	813.352	0.0391152	0.164483	0.812031
ENSGALG00000017184	MMP7	1	0	NA	NA	NA
ENSGALG00000017185	TMEM123	1	4069.87	0.156625	0.215378	0.467096
ENSGALG00000015191	CD200R1L	1	6.44775	0.458584	0.903787	0.611872
ENSGALG00000016776	TBC1D8	1	438.018	0.40081	0.246838	0.104423
ENSGALG00000025193	7SK	1	0	NA	NA	NA
ENSGALG00000019231	CD200R1	1	86.1205	0.569282	0.448581	0.204415
ENSGALG00000008975	FAM3C	1	3011.59	0.203846	0.166265	0.220187
ENSGALG00000016775	RPL31	1	17116.3	0.106666	0.174038	0.539951
ENSGALG00000029616	HCFC2	1	1301.13	0.18061	0.248003	0.466457
ENSGALG00000017186	BIRC3	1	2719.86	-0.109976	0.251939	0.66246
ENSGALG00000039563	CNOT11	1	2447.93	-0.11673	0.179506	0.515508
ENSGALG00000025284	SNORD89	1	21.3772	0.229694	0.510413	0.652698
ENSGALG00000015193	CCDC80	1	8098.17	1.39485	0.166484	5.36989e-17
ENSGALG00000034078	GLT8D2	1	245.845	1.4475	0.332983	1.37967e-05
ENSGALG00000016779	RNF149	1	760.632	0.13713	0.179938	0.446003
ENSGALG00000040947	CREG2	1	188.598	0.306844	0.210011	0.143993
ENSGALG00000028069	WNT16	1	169.769	0.613995	0.268658	0.0222883
ENSGALG00000045388	RFX8	1	0.473065	0.491019	3.84838	0.898473
ENSGALG00000009002	CPED1	1	227.11	-0.446209	0.359555	0.214605
ENSGALG00000015197	SLC35A5	1	537.783	0.340309	0.17684	0.0543064
ENSGALG00000025216	gga-mir-1645	1	0	NA	NA	NA
ENSGALG00000031457	TDG	1	3760.08	-0.0642738	0.214552	0.764504
ENSGALG00000009023	ING3	1	1295.03	0.275894	0.157651	0.0801145
ENSGALG00000015204	ATG3	1	2572.62	-0.156956	0.23617	0.506313
ENSGALG00000030933	C1H12ORF73	1	866.708	-0.114655	0.245696	0.640748
ENSGALG00000009029	TSPAN12	1	1154.42	-0.066752	0.178192	0.707953
ENSGALG00000033789	HSP90B1	1	31646.9	0.0206964	0.152932	0.892351
ENSGALG00000016781	MAP4K4	1	5810.21	0.163664	0.239622	0.494602
ENSGALG00000038154	YAP1	1	6325.96	0.0595069	0.16449	0.717527
ENSGALG00000029298	F5	1	475.698	0.532583	0.322453	0.0986037
ENSGALG00000015218	SLC19A2	1	152.632	-0.732164	0.343296	0.0329454
ENSGALG00000009066	KCND2	1	30.4969	0.506805	0.450555	0.260654
ENSGALG00000015221	CCDC181	1	94.8563	-0.350623	0.289897	0.226482
ENSGALG00000017189	C1H11ORF70	1	144.439	-0.0283972	0.244398	0.9075
ENSGALG00000015225	BLZF1	1	1595.25	-0.189657	0.190503	0.319466
ENSGALG00000017190	CEP126	1	41.6329	0.321193	0.369369	0.384535
ENSGALG00000009104	ANKRD26	1	1433.18	0.134776	0.319807	0.673442
ENSGALG00000017191	ANGPTL5	1	29.6558	0.70774	0.517587	0.171505
ENSGALG00000052779		1	0	NA	NA	NA
ENSGALG00000050036		1	0	NA	NA	NA
ENSGALG00000047752		1	0	NA	NA	NA
ENSGALG00000029416	TRPC6	1	623.12	1.51876	0.289875	1.61122e-07
ENSGALG00000015230	NME7	1	642.835	-0.314101	0.219946	0.153268
ENSGALG00000048037	gga-mir-7450	1	0	NA	NA	NA
ENSGALG00000049834		1	0	NA	NA	NA
ENSGALG00000051076	gga-mir-7450	1	0	NA	NA	NA
ENSGALG00000029746	NT5DC3	1	510.225	-0.50183	0.216698	0.0205691
ENSGALG00000017195	PGR	1	160.103	0.388399	0.287914	0.177334
ENSGALG00000039245	STAB2	1	317.061	1.84554	0.933925	0.0481424
ENSGALG00000017196	ARHGAP42	1	2185.62	-0.105368	0.255753	0.680346
ENSGALG00000015233	ATP1B1	1	18471.5	-0.262922	0.184939	0.155121
ENSGALG00000017197	CNTN5	1	177.529	4.54703	0.378025	2.52049e-33
ENSGALG00000009110	LSM8	1	756.584	0.0524675	0.237703	0.825305
ENSGALG00000051926		1	0.403526	-2.26485	4.02736	0.573867
ENSGALG00000025385	gga-mir-1690	1	0.100757	0.710792	4.07651	0.86158
ENSGALG00000039376	DPT	1	73.3293	0.755183	0.477611	0.11384
ENSGALG00000037082	ASCL1	1	5.69475	3.49567	1.31264	0.00774296
ENSGALG00000009134	CTTNBP2	1	1757.82	-0.323495	0.295269	0.273256
ENSGALG00000012754	PAH	1	31.7848	4.92416	0.796947	6.46007e-10
ENSGALG00000015235	XCL1	1	29.0765	-0.517489	0.560463	0.355838
ENSGALG00000015244	TBX19	1	10.8153	-0.82274	0.732889	0.261608
ENSGALG00000019228	SFT2D2	1	1175.83	-0.854008	0.206978	3.68982e-05
ENSGALG00000019300		1	0.366243	-0.100584	4.06255	0.980247
ENSGALG00000032986	CFTR	1	165.198	0.392015	0.45978	0.393873
ENSGALG00000015246	TIPRL	1	2684.9	-0.232354	0.172985	0.179206
ENSGALG00000015247	GPR161	1	712.045	-0.218432	0.252901	0.387749
ENSGALG00000015249		1	1640.72	-0.325512	0.173479	0.0606028
ENSGALG00000047209		1	262.608	-0.102961	0.217604	0.6361
ENSGALG00000012755	IGF-I	1	20.8363	1.54159	0.655981	0.018771
ENSGALG00000015240		1	4100.31	-0.590173	0.78736	0.453521
ENSGALG00000012756	PARPBP	1	382.279	-0.183395	0.255126	0.472239
ENSGALG00000050052		1	2.84244	2.90026	1.59151	0.068405
ENSGALG00000017900	U6	1	0	NA	NA	NA
ENSGALG00000046803		1	0.26714	0.789056	4.07366	0.846413
ENSGALG00000054590		1	0	NA	NA	NA
ENSGALG00000050398		1	1.02953	-0.200036	2.02489	0.921306
ENSGALG00000047411		1	0.302272	1.75094	4.02538	0.66358
ENSGALG00000054365		1	0	NA	NA	NA
ENSGALG00000034574	ASZ1	1	15.2614	0.226623	0.594979	0.703283
ENSGALG00000013489	CCDC82	1	821.821	0.523464	0.181631	0.00395132
ENSGALG00000015252	ST3GAL6	1	2764.57	-0.585017	0.172284	0.000684673
ENSGALG00000012757	PMCH	1	78.6229	-0.52325	0.310958	0.0924324
ENSGALG00000030173	WNT2	1	18.5296	0.13293	0.729599	0.855429
ENSGALG00000012759	NUP37	1	2290.53	-0.141249	0.227112	0.533984
ENSGALG00000017199	MAML2	1	1302.65	0.770107	0.262863	0.00339303
ENSGALG00000027124	gga-mir-6570	1	0.806803	-1.2705	3.2573	0.696502
ENSGALG00000037206	ST7	1	624.083	0.0117811	0.203546	0.953845
ENSGALG00000017200	MTMR2	1	1998.44	-0.676605	0.220353	0.00213661
ENSGALG00000012760	WASHC3	1	2100.38	-0.0721631	0.153669	0.63864
ENSGALG00000012761	DRAM1	1	38.9119	0.461316	0.453085	0.308599
ENSGALG00000012763	GNPTAB	1	4152	-0.208636	0.153265	0.173426
ENSGALG00000012766		1	207.993	-0.125338	0.208531	0.547806
ENSGALG00000012769	CHPT1	1	2017.12	-0.0448219	0.145912	0.758704
ENSGALG00000017201	CEP57	1	529.007	-0.38415	0.238737	0.107596
ENSGALG00000017202	FAM76B	1	1015.11	-0.061236	0.156782	0.696107
ENSGALG00000017204	SESN3	1	734.84	-0.123199	0.306809	0.688016
ENSGALG00000017205	ENDOD1	1	268.178	-0.104912	0.284067	0.711889
ENSGALG00000017207	CWC15	1	4458.81	-0.088018	0.203813	0.665846
ENSGALG00000028180		1	5.60558	0.483131	1.01055	0.632586
ENSGALG00000043437	CAPZA2	1	12392.8	0.185667	0.221202	0.401269
ENSGALG00000015253	COL8A1	1	79.3619	1.69884	0.42902	7.50095e-05
ENSGALG00000015258	DCBLD2	1	10857.3	-0.999908	0.210784	2.09797e-06
ENSGALG00000017208	AMOTL1	1	764.227	-0.476968	0.299255	0.110969
ENSGALG00000036883	MET	1	87.1326	-0.381249	0.318215	0.230883
ENSGALG00000022718	FUT4	1	35.0511	-0.0331023	0.463421	0.943055
ENSGALG00000054258		1	10.2593	-0.899467	0.727843	0.216533
ENSGALG00000017210	ANKRD49	1	1046.86	-0.13341	0.218536	0.54155
ENSGALG00000012783	MYBPC1	1	137.443	0.426916	0.418807	0.308031
ENSGALG00000017211	MRE11	1	2357.58	-0.12892	0.209667	0.538634
ENSGALG00000048658		1	0.90634	3.14169	2.5771	0.222813
ENSGALG00000043287	CAV1	1	2491.49	0.364932	0.15416	0.0179222
ENSGALG00000015263		1	63.2808	-0.196497	0.454729	0.665655
ENSGALG00000033295	CAV2	1	650.225	-0.00584456	0.158651	0.970613
ENSGALG00000031934	TES	1	1835.64	0.509221	0.179339	0.00451935
ENSGALG00000015267	CMSS1	1	1008.75	0.0314509	0.169574	0.85286
ENSGALG00000054799	SPIC	1	0.473065	0.491019	3.84838	0.898473
ENSGALG00000040557	TFEC	1	15.5514	0.490551	0.586639	0.403039
ENSGALG00000017212	GPR83	1	24.0118	-3.05004	0.800194	0.000138054
ENSGALG00000026838	MDFIC	1	4268.95	0.376805	0.23419	0.107622
ENSGALG00000025365	gga-mir-1656	1	0.201515	1.31624	4.04759	0.745037
ENSGALG00000037742	gga-mir-1552	1	0.403526	-2.26485	4.02736	0.573867
ENSGALG00000026432	gga-mir-6543	1	0	NA	NA	NA
ENSGALG00000039751	PANX1	1	84.214	0.342124	0.285668	0.231062
ENSGALG00000046326	IL1R2	1	7.34002	0.728576	0.83414	0.38242
ENSGALG00000046187	PARP12	1	1642.47	0.18279	0.228197	0.423122
ENSGALG00000009424	FOXP2	1	1142.28	0.288407	0.28133	0.30529
ENSGALG00000043027	HEPHL1	1	24.0727	-1.52702	0.567331	0.00711142
ENSGALG00000043044	IL1R1	1	835.402	1.34195	0.229562	5.04526e-09
ENSGALG00000028629	TM4SF1a	1	1.16766	2.46208	3.02275	0.415349
ENSGALG00000030526		1	273.189	0.957279	0.265469	0.000310955
ENSGALG00000012791	TBXAS1	1	193.319	0.156187	0.233171	0.502961
ENSGALG00000017216		1	1.27275	-0.72571	1.96637	0.712082
ENSGALG00000016785	IL1RL1	1	1545.8	-0.343652	0.274614	0.210789
ENSGALG00000052846		1	0.337414	-0.323106	4.05558	0.9365
ENSGALG00000053114		1	170.827	0.358159	0.335595	0.285865
ENSGALG00000017217	VSTM5	1	121.485	0.397791	0.380844	0.296255
ENSGALG00000009435	PPP1R3A	1	1.13883	2.07663	2.60191	0.424803
ENSGALG00000009439	GPR85	1	46.3232	0.728239	0.348945	0.0368906
ENSGALG00000053198		1	355.569	0.46383	0.340458	0.173081
ENSGALG00000025332	gga-mir-1695	1	0	NA	NA	NA
ENSGALG00000017218	MED17	1	1613.52	-0.164315	0.184681	0.373615
ENSGALG00000009440	BMT2	1	1265.4	0.048465	0.176501	0.783633
ENSGALG00000015271		1	3760.73	1.33642	0.197157	1.21462e-11
ENSGALG00000009443	TMEM168	1	782.823	0.00240698	0.18198	0.989447
ENSGALG00000009446	LSMEM1	1	835.509	-0.604526	0.191442	0.00158991
ENSGALG00000015273	TBC1D23	1	2307.68	-0.0226606	0.156707	0.885022
ENSGALG00000009448	IFRD1	1	3197.47	-0.0665338	0.174762	0.703417
ENSGALG00000012792	HIPK2	1	3152.84	-0.176638	0.165457	0.285712
ENSGALG00000017219	C1H11ORF54	1	96.7971	0.270669	0.268742	0.313853
ENSGALG00000009454	ZNF277	1	922.369	-0.268929	0.209541	0.199344
ENSGALG00000015275	NIT2	1	908.484	-0.103703	0.180318	0.565216
ENSGALG00000049134		1	0.874439	0.88593	2.29693	0.699718
ENSGALG00000012796	KIAA1549	1	1565.55	-0.129129	0.364564	0.723189
ENSGALG00000040621	IL18R1	1	143.647	1.10008	0.264647	3.22753e-05
ENSGALG00000017220		1	1268.24	0.261533	0.165727	0.114543
ENSGALG00000040666	ATP6V0A4	1	12.1553	-0.642892	0.743894	0.387464
ENSGALG00000015285	TOMM70	1	3535.94	-0.470864	0.17242	0.00631589
ENSGALG00000016788	IL18RAP	1	6.21576	1.34458	1.01039	0.18327
ENSGALG00000009480	DOCK4	1	1285.91	-1.3597	0.459294	0.00307233
ENSGALG00000037439	SLC9A4	1	0.941471	3.25816	2.47469	0.187975
ENSGALG00000012812	SVOPL	1	30.4818	0.135855	0.486348	0.779986
ENSGALG00000016791	SLC9A2	1	9.5864	0.0638988	0.751532	0.932242
ENSGALG00000012823	TRIM24	1	1819.85	0.178917	0.238573	0.453287
ENSGALG00000016792	MFSD9	1	400.567	0.296525	0.175119	0.0904033
ENSGALG00000015287	LNP1	1	15.7423	0.245327	0.560658	0.661698
ENSGALG00000051797		1	0.26714	0.789056	4.07366	0.846413
ENSGALG00000049160	gga-mir-12211	1	0.0991028	-1.11334	4.06938	0.784401
ENSGALG00000038936	TMEM182	1	76.3175	0.833168	0.422512	0.0486166
ENSGALG00000012834	AKR1D1	1	2201.16	1.80068	0.392733	4.53987e-06
ENSGALG00000048730		1	0	NA	NA	NA
ENSGALG00000015293	TMEM45A	1	78.468	1.29926	0.37154	0.000470592
ENSGALG00000050019	5S_rRNA	1	0	NA	NA	NA
ENSGALG00000033739	POU3F3	1	0	NA	NA	NA
ENSGALG00000016794	MRPS9	1	4383.16	-0.712748	0.242369	0.00327414
ENSGALG00000015294	ADGRG7	1	0.60504	-0.713305	3.55403	0.840931
ENSGALG00000009485	IMMP2L	1	201.728	0.138727	0.239275	0.56206
ENSGALG00000034511		1	84.7047	0.505442	0.313529	0.106939
ENSGALG00000015299	TFG	1	4930.86	0.182026	0.173472	0.294037
ENSGALG00000016795	TGFBRAP1	1	588.731	-0.205107	0.333709	0.538801
ENSGALG00000049529		1	74.032	1.87152	0.536923	0.000490969
ENSGALG00000016796	C1H2ORF49	1	2135.92	-0.350176	0.18046	0.0523238
ENSGALG00000009488	LRRN3	1	105.498	2.37938	0.412649	8.11155e-09
ENSGALG00000050401		1	0	NA	NA	NA
ENSGALG00000052984		1	0.337414	-0.323106	4.05558	0.9365
ENSGALG00000009492	DNAJB9	1	1177.26	-0.091545	0.193159	0.635546
ENSGALG00000016797	FHL2	1	28533.8	-1.34651	0.199151	1.36776e-11
ENSGALG00000012847		1	373.195	-0.417173	0.191064	0.0290049
ENSGALG00000035108	KDM7A	1	402.751	0.198918	0.183907	0.279419
ENSGALG00000009494	THAP5	1	1977.62	-0.0436814	0.186564	0.81488
ENSGALG00000012849	SLC37A3	1	1605.56	0.0982172	0.191765	0.608529
ENSGALG00000015307		1	34.1668	2.69602	0.551521	1.01692e-06
ENSGALG00000009497	AVPR2	1	1.03119	0.389426	2.2956	0.865293
ENSGALG00000016799	NCK1	1	3889.56	-0.21763	0.142923	0.127831
ENSGALG00000009505	PNPLA8	1	1388.14	0.0925045	0.157895	0.55797
ENSGALG00000012850	RAB19	1	357.259	-0.525213	0.201838	0.00926386
ENSGALG00000012852	MKRN4P	1	4792.9	-0.203941	0.132965	0.12508
ENSGALG00000043690	ECRG4	1	1198.24	1.3978	0.299904	3.14938e-06
ENSGALG00000009514	NRCAM	1	14.4286	-0.449207	0.596762	0.451605
ENSGALG00000025701		1	0.201763	-1.33585	4.06242	0.742283
ENSGALG00000016801	UXS1	1	1622.63	-0.106567	0.159867	0.505028
ENSGALG00000025662		1	4.35615	-0.911999	1.02774	0.374872
ENSGALG00000040433		1	2501.42	-0.127996	0.212561	0.547068
ENSGALG00000037671		1	62.5237	-0.899714	0.336919	0.00757575
ENSGALG00000017812		1	0	NA	NA	NA
ENSGALG00000017813		1	0	NA	NA	NA
ENSGALG00000017814		1	0	NA	NA	NA
ENSGALG00000017815		1	0	NA	NA	NA
ENSGALG00000024565		1	21.0211	0.249291	0.66513	0.707808
ENSGALG00000025680		1	33.8443	-0.0468773	0.462593	0.919284
ENSGALG00000025003		1	2.34124	-0.376452	1.45172	0.795392
ENSGALG00000025390		1	2.78191	-0.4195	1.5223	0.782878
ENSGALG00000026639	SMCO4	1	748.979	-0.288525	0.31817	0.364498
ENSGALG00000053603		1	0	NA	NA	NA
ENSGALG00000012857	DENND2A	1	3739.42	0.26026	0.177521	0.142626
ENSGALG00000016802		1	25.1449	-1.69598	0.527949	0.00131635
ENSGALG00000044263	DEUP1	1	3.8882	0.90446	1.39356	0.516321
ENSGALG00000012863	ADCK2	1	418.755	0.0905131	0.218362	0.678501
ENSGALG00000051868		1	29.1881	0.248951	0.435345	0.567426
ENSGALG00000016803	ST6GAL2	1	324.873	0.478641	0.465202	0.303532
ENSGALG00000032595	NDUFB2	1	3566.34	-0.223957	0.22453	0.318547
ENSGALG00000017227	SLC36A4	1	105.739	0.159719	0.277118	0.564375
ENSGALG00000015322	IMPG2	1	99.6218	0.685246	0.32115	0.0328655
ENSGALG00000017228	MTNR1B	1	10.7163	1.92909	0.840254	0.0216851
ENSGALG00000047766		1	0.26714	0.789056	4.07366	0.846413
ENSGALG00000044642	SENP7	1	990.127	0.309709	0.236427	0.19021
ENSGALG00000015324		1	5.72157	0.399952	0.918662	0.663299
ENSGALG00000052013	gga-mir-12208	1	0.0991028	-1.11334	4.06938	0.784401
ENSGALG00000053908		1	0	NA	NA	NA
ENSGALG00000012865	BRAF	1	590.865	-0.202274	0.304304	0.506235
ENSGALG00000017229	FAT3	1	1046.35	-0.805771	0.978313	0.410148
ENSGALG00000015327	TXNL4B	1	345.96	-0.0081813	0.243374	0.973183
ENSGALG00000009523	CNTN1	1	218.305	1.52769	0.26628	9.62794e-09
ENSGALG00000015328	TRMT10C	1	2007.59	-0.275136	0.221477	0.214135
ENSGALG00000015330	PCNP	1	5210.91	-0.0159734	0.194231	0.934457
ENSGALG00000016804	SLC5A7	1	2.63897	0.503372	1.84458	0.784935
ENSGALG00000016805	SULT1C3	1	13.9166	4.28623	1.49448	0.00413017
ENSGALG00000015334	ZBTB11	1	479.253	-0.223011	0.228217	0.328477
ENSGALG00000054191		1	76.98	-0.0446704	0.299261	0.881341
ENSGALG00000015339	RPL24	1	22639.4	-0.00499685	0.201007	0.980167
ENSGALG00000052183		1	48.7517	-0.378766	0.350226	0.279479
ENSGALG00000016806	GCC2	1	1873.3	-0.183695	0.221992	0.407962
ENSGALG00000015342		1	272.669	-0.200721	0.196515	0.307063
ENSGALG00000029970	LIMS1	1	1681.99	0.0594983	0.158182	0.706815
ENSGALG00000015344	NXPE3	1	563.553	-0.248424	0.246538	0.313624
ENSGALG00000015346	NFKBIZ	1	508.665	0.654843	0.29367	0.0257568
ENSGALG00000049896		1	0.0991028	-1.11334	4.06938	0.784401
ENSGALG00000035461	CHORDC1	1	1062.51	-0.277544	0.188858	0.141673
ENSGALG00000028879	MRPS33	1	3063.43	-0.217623	0.211136	0.302671
ENSGALG00000015347	ZPLD1	1	18.1899	0.289537	0.723228	0.688907
ENSGALG00000028444	TMEM178B	1	85.5658	0.466827	0.360988	0.195944
ENSGALG00000012870	AGK	1	1480.18	-0.308826	0.193644	0.110755
ENSGALG00000054821	NAALAD2	1	253.432	1.28518	0.322852	6.87132e-05
ENSGALG00000017234	FOLH1	1	404.096	-0.312203	0.268148	0.244306
ENSGALG00000009530	PDZRN4	1	1521.61	1.34022	0.210622	1.97615e-10
ENSGALG00000009532	GXYLT1	1	2026.79	0.6293	0.163145	0.000114638
ENSGALG00000047888		1	1.28588	-3.87783	2.34315	0.0979315
ENSGALG00000044599		1	84.8667	-0.0482026	0.361211	0.89384
ENSGALG00000017235	NOX4	1	404.164	1.08514	0.392973	0.00575592
ENSGALG00000012874	DENND11	1	222.3	-0.0674423	0.244516	0.782687
ENSGALG00000015348	ALCAM	1	12878.5	-0.0123379	0.17546	0.943941
ENSGALG00000012875	WEE2	1	15.4934	0.810563	0.604523	0.179975
ENSGALG00000046960		1	460.823	0.0272152	0.296562	0.926882
ENSGALG00000017237	TYR	1	0.674579	1.24334	2.83213	0.660653
ENSGALG00000009540	YAF2	1	1576.33	0.0317584	0.168446	0.850455
ENSGALG00000012876	SSBP1	1	2763.4	-0.207488	0.27911	0.457243
ENSGALG00000009544	ZCRB1	1	1761.35	-0.217121	0.221723	0.327461
ENSGALG00000012877	CREB3L2	1	936.025	0.165877	0.212309	0.434628
ENSGALG00000009547	PPHLN1	1	1385.13	0.0480412	0.149634	0.748167
ENSGALG00000017238	GRM5	1	3.99929	1.6127	1.29474	0.212921
ENSGALG00000017239	CTSC	1	2843.5	0.114942	0.160733	0.474543
ENSGALG00000048911		1	37.4186	-0.182452	0.456031	0.689092
ENSGALG00000012890	DGKI	1	373.804	-4.87218	0.317593	4.07261e-53
ENSGALG00000051334		1	26.8583	0.105637	0.502286	0.833424
ENSGALG00000028018	RAB38	1	3.989	0.453305	1.14153	0.691292
ENSGALG00000052731		1	1.12399	0.250596	2.25196	0.911395
ENSGALG00000025285	gga-mir-1657	1	0	NA	NA	NA
ENSGALG00000040493	PTN	1	53634.1	0.043318	0.178027	0.807756
ENSGALG00000047269	TMEM135	1	1961.63	-0.390137	0.146919	0.00792014
ENSGALG00000047978	gga-mir-7447	1	7.4969	-0.339505	1.02674	0.740899
ENSGALG00000009556	PRICKLE1	1	3687.66	0.0155215	0.226897	0.945461
ENSGALG00000046504		1	11.478	-0.605539	0.700092	0.387071
ENSGALG00000017242	FZD4	1	3611.26	-0.991462	0.302245	0.00103689
ENSGALG00000009572	ADAMTS20	1	2627.76	-2.24301	0.402263	2.46153e-08
ENSGALG00000017244	PRSS23	1	2564.16	0.570628	0.238776	0.0168571
ENSGALG00000015351	CBLB	1	322.548	0.380729	0.247746	0.124348
ENSGALG00000045815		1	7.49604	-0.309445	0.77672	0.690336
ENSGALG00000017246	ME3	1	2588.68	0.172846	0.157199	0.271534
ENSGALG00000009577	PUS7L	1	382.588	-0.140718	0.201836	0.485686
ENSGALG00000033619		1	60.4641	-0.134504	0.358419	0.70746
ENSGALG00000009586	IRAK4	1	175.604	0.277148	0.26571	0.296928
ENSGALG00000012894	CHRM2	1	1826.44	-0.928841	0.316123	0.00330099
ENSGALG00000021734	gga-mir-490	1	1.00881	-3.56614	3.59728	0.321518
ENSGALG00000053106	FAM181B	1	189.569	-0.138943	0.240245	0.563036
ENSGALG00000015353	BBX	1	1154.87	-0.222659	0.227457	0.327628
ENSGALG00000051894		1	0.401623	-1.02746	3.40477	0.762828
ENSGALG00000037521	PRCP	1	2160.2	1.9117	0.218413	2.08318e-18
ENSGALG00000041619	MTPN	1	9465.97	-0.122526	0.210934	0.561326
ENSGALG00000000071		1	363.829	0.215132	0.267775	0.42174
ENSGALG00000028459	FAM180A	1	0.903269	1.3536	2.30506	0.557051
ENSGALG00000052894		1	247.918	-0.162123	0.316745	0.608761
ENSGALG00000048820		1	2.06239	0.937286	1.61248	0.561058
ENSGALG00000012908	SLC13A4	1	0.389847	-2.06317	4.03708	0.609313
ENSGALG00000017248	RAB30	1	2276.01	-0.458438	0.195836	0.0192362
ENSGALG00000009595	TWF1	1	4095.94	-0.314865	0.179651	0.0796631
ENSGALG00000036355	C7orf73	1	2149.73	0.0412845	0.168354	0.806282
ENSGALG00000054689		1	10.1489	1.79627	0.945024	0.0573327
ENSGALG00000017249	PCF11	1	3440.97	-0.113652	0.185877	0.540909
ENSGALG00000049432		1	12.0396	-0.917636	0.979931	0.349052
ENSGALG00000044260		1	3037.84	-0.253062	0.243757	0.29919
ENSGALG00000012911	SYT10	1	3.67321	5.22481	1.6573	0.00161826
ENSGALG00000017250	ANKRD42	1	36.438	0.478389	0.416219	0.250404
ENSGALG00000012913	PKP2	1	5661.01	-1.28244	0.19656	6.82601e-11
ENSGALG00000015355	CD47	1	6822.24	0.522514	0.142934	0.00025656
ENSGALG00000009596	TMEM117	1	142.483	0.61313	0.329405	0.0626985
ENSGALG00000012919	YARS2	1	1301.16	-0.681642	0.199674	0.000640684
ENSGALG00000012929	DNM1L	1	9221.1	-0.749461	0.162563	4.0214e-06
ENSGALG00000053883		1	0.201763	-1.33585	4.06242	0.742283
ENSGALG00000037072	CCDC90B	1	1493.48	-0.213843	0.200183	0.285414
ENSGALG00000009601	NELL2	1	1033.22	1.49655	0.263782	1.39955e-08
ENSGALG00000045305		1	212.331	0.475686	0.307229	0.121548
ENSGALG00000041225		1	25.4987	0.349537	0.480071	0.466556
ENSGALG00000047652		1	56.2854	0.741289	0.339931	0.0292053
ENSGALG00000009603		1	28.0694	0.626655	0.433462	0.148262
ENSGALG00000042992		1	79.7867	0.829425	0.337626	0.0140244
ENSGALG00000016808		1	2108.19	-0.123369	0.223947	0.581714
ENSGALG00000009604	DBX2	1	755.132	0.97079	0.334358	0.00369079
ENSGALG00000025381		1	0	NA	NA	NA
ENSGALG00000051620		1	1.57393	0.561246	1.71584	0.743595
ENSGALG00000009638	ANO6	1	733.878	2.04884	0.287861	1.09937e-12
ENSGALG00000049171		1	1.70688	0.0295966	1.72698	0.986327
ENSGALG00000046889		1	8.03097	-0.0247471	1.06526	0.981466
ENSGALG00000015356	IFT57	1	855.728	0.177008	0.175512	0.313202
ENSGALG00000014066		1	1678.21	-0.439018	0.180038	0.0147496
ENSGALG00000033074	ARID2	1	1570.68	0.00297902	0.277702	0.991441
ENSGALG00000016809	EDAR	1	39.8157	1.60942	0.428071	0.000170114
ENSGALG00000028849	SCAF11	1	8362.32	-0.477868	0.199152	0.0164168
ENSGALG00000022871	HHLA2	1	420.86	1.23362	0.207198	2.61943e-09
ENSGALG00000054834		1	11.4994	0.126659	0.714095	0.859218
ENSGALG00000016810	SH3RF3	1	171.005	0.0710398	0.342577	0.835722
ENSGALG00000009698	SLC38A1	1	3159.97	-0.662468	0.352137	0.0599341
ENSGALG00000025297	gga-mir-1700	1	0	NA	NA	NA
ENSGALG00000016811	SEPTIN10	1	506.864	0.338221	0.167732	0.0437551
ENSGALG00000008497	SLC38A2	1	8816.94	-0.0562599	0.193807	0.771596
ENSGALG00000037520	CCDC89	1	3.05046	0.374154	1.31136	0.775401
ENSGALG00000026360	SOWAHC	1	210.638	0.131675	0.237625	0.579489
ENSGALG00000015358	MYH15	1	61300	0.525396	0.445527	0.238291
ENSGALG00000016813	CHAMP1	1	2441.5	-0.270371	0.150898	0.073173
ENSGALG00000012932	FGD4	1	69.2627	0.838791	0.48453	0.0834262
ENSGALG00000032681		1	682.043	0.434048	0.178302	0.0149187
ENSGALG00000050442		1	25.1204	-0.0902336	0.563424	0.872761
ENSGALG00000016815		1	38.249	-0.0207018	0.514807	0.967923
ENSGALG00000015360	KIAA1524	1	2164.54	-0.246218	0.194552	0.20567
ENSGALG00000025619	U1	1	1.75748	0.754045	2.01094	0.707681
ENSGALG00000016816	CDC16	1	1640.72	-0.342356	0.221039	0.121418
ENSGALG00000054836		1	1.94144	3.06754	1.87982	0.102716
ENSGALG00000009730	SLC38A4	1	22.5664	1.64028	0.689931	0.0174327
ENSGALG00000028448	SH2D1B	1	0.674579	1.24334	2.83213	0.660653
ENSGALG00000015362	TRAT1	1	6.00992	-0.832565	0.908705	0.359557
ENSGALG00000012934	BICD1	1	291.07	-0.161255	0.249481	0.518045
ENSGALG00000015363	HJURP	1	1635.36	-0.41003	0.24115	0.0890722
ENSGALG00000016817	RASA3	1	2362.16	0.00109228	0.183124	0.995241
ENSGALG00000051944		1	0.995135	-3.52456	2.53992	0.16524
ENSGALG00000045168		1	4477.91	0.0618034	0.139311	0.657305
ENSGALG00000025922	gga-mir-6700	1	0.469507	0.188936	3.85136	0.960874
ENSGALG00000016820	GAS6	1	219.288	-0.373127	0.326258	0.252766
ENSGALG00000012938	AMN1	1	1140.16	-0.537945	0.240312	0.025187
ENSGALG00000015364	GUCA1C	1	9.15121	-1.32031	0.869842	0.129047
ENSGALG00000035839	TMEM255B	1	3.2215	-0.00796746	1.20111	0.994707
ENSGALG00000013247		1	94.7975	0.411206	0.294108	0.162069
ENSGALG00000016822	ATP4B	1	1.90091	-0.97678	1.56064	0.53139
ENSGALG00000027056		1	861.91	-0.34137	0.291245	0.241156
ENSGALG00000009739	AMIGO2	1	277.812	0.159612	0.245106	0.51492
ENSGALG00000047477		1	0.535619	-1.30964	3.07162	0.66984
ENSGALG00000016823	TFDP1	1	5072.92	-0.423724	0.255299	0.096971
ENSGALG00000047952		1	0.835989	0.676254	2.66053	0.799356
ENSGALG00000015367	NECTIN3	1	987.325	-0.411517	0.181433	0.0233199
ENSGALG00000012944	DENND5B	1	2765.68	-0.840683	0.343278	0.0143259
ENSGALG00000039037	PICALM	1	2754.34	-0.0531524	0.145097	0.714125
ENSGALG00000009743	RPAP3	1	2119.3	-0.172434	0.19014	0.36447
ENSGALG00000014060	EED	1	881.93	-0.180755	0.193827	0.351047
ENSGALG00000015375	PLCXD2	1	138.113	-1.06943	0.618018	0.0835561
ENSGALG00000016824	TMCO3	1	785.669	0.206148	0.204784	0.314098
ENSGALG00000015377	PHLDB2	1	6468.06	0.278742	0.137164	0.0421345
ENSGALG00000012946	FAM60A	1	2734.92	-0.194999	0.184888	0.291569
ENSGALG00000001823	HIKESHI	1	2538.52	-0.0294295	0.178643	0.869149
ENSGALG00000029145	DCUN1D2	1	1494.42	-0.490813	0.24524	0.0453538
ENSGALG00000037819		1	12.97	-0.131028	0.798405	0.869642
ENSGALG00000032712		1	0	NA	NA	NA
ENSGALG00000015378	ABHD10	1	339.492	-0.495213	0.197909	0.0123417
ENSGALG00000015379	TAGLN3	1	7.85298	1.10528	0.812078	0.173499
ENSGALG00000054982		1	1423.62	-0.813744	0.232391	0.00046245
ENSGALG00000016826		1	8140.87	-0.742321	0.22355	0.00089825
ENSGALG00000016828	GRTP1	1	2215.04	-1.12302	0.207525	6.24971e-08
ENSGALG00000037697	LAMP1	1	9785.13	0.0124458	0.140129	0.929227
ENSGALG00000015389	TMPRSS7	1	24.4671	0.621161	0.574299	0.279431
ENSGALG00000039029		1	0	NA	NA	NA
ENSGALG00000049023		1	4.64426	-0.442882	1.63273	0.786197
ENSGALG00000009747	ATP23	1	1249.11	-0.129944	0.186975	0.487068
ENSGALG00000016830	CUL4A	1	1377.31	0.0865668	0.161512	0.591975
ENSGALG00000033966	TENM4	1	3963.35	0.74009	0.747524	0.322147
ENSGALG00000026299	C3orf52	1	68.4631	1.11094	0.32876	0.000726975
ENSGALG00000025369	gga-mir-1593	1	0.19986	-0.178853	4.0654	0.964909
ENSGALG00000045596		1	9.40295	0.177389	0.689464	0.796958
ENSGALG00000012947	CAPRIN2	1	1694.65	-0.299898	0.172539	0.0821854
ENSGALG00000015395	CD200L	1	8.86681	-1.12148	0.934225	0.229968
ENSGALG00000012953	IPO8	1	2630.4	-0.429284	0.190477	0.0242128
ENSGALG00000017262	NARS2	1	1213.78	-0.411003	0.163762	0.0120813
ENSGALG00000015396	CD200	1	1499.87	0.427892	0.174094	0.013978
ENSGALG00000012956	TMTC1	1	799.875	1.79936	0.281253	1.57753e-10
ENSGALG00000009755	LRIG3	1	812.269	-0.148545	0.287769	0.605718
ENSGALG00000015400	CGGBP1	1	884.631	-0.200783	0.183483	0.27383
ENSGALG00000054619	GAB2	1	404.347	-0.0422394	0.312266	0.8924
ENSGALG00000053507		1	208.319	0.900973	0.218007	3.58408e-05
ENSGALG00000016831	PCID2	1	2565.13	-0.109439	0.186833	0.558038
ENSGALG00000022866	ZNF654	1	672.427	-0.128198	0.255946	0.616458
ENSGALG00000052684		1	2273.77	0.208762	0.217463	0.337061
ENSGALG00000053509	DDX11	1	696.638	-0.00844863	0.158083	0.957378
ENSGALG00000048028		1	0.337166	1.85913	4.02074	0.643806
ENSGALG00000015402	C3orf38	1	613.227	-0.0228247	0.186094	0.902383
ENSGALG00000035007	USP35	1	29.5029	0.506	0.466503	0.278069
ENSGALG00000015403	EPHA3	1	932.257	0.806484	0.376473	0.0321765
ENSGALG00000012974	WASH1	1	1089.88	0.2726	0.176248	0.121939
ENSGALG00000017268	KCTD21	1	36.9425	0.556286	0.393782	0.157752
ENSGALG00000017893		1	0	NA	NA	NA
ENSGALG00000050139		1	2.10433	-0.842594	1.51675	0.578535
ENSGALG00000019042	ALG8	1	849.764	-0.184165	0.166992	0.270099
ENSGALG00000049710		1	0.401623	-1.02746	3.40477	0.762828
ENSGALG00000009759	SLC16A7	1	821.858	-1.44124	0.320491	6.8929e-06
ENSGALG00000016832	PROZ	1	7.11586	4.07771	1.64821	0.0133598
ENSGALG00000028078		1	0	NA	NA	NA
ENSGALG00000052286	MGAT1	1	906.359	0.107915	0.221682	0.6264
ENSGALG00000029172	NDUFC2	1	2857.14	-0.471285	0.22207	0.0338183
ENSGALG00000015409	PROS1	1	1424.71	0.152539	0.155471	0.326525
ENSGALG00000054981		1	0.0991028	-1.11334	4.06938	0.784401
ENSGALG00000026677	F10	1	289.835	0.53931	0.214951	0.0121077
ENSGALG00000052452		1	0.855193	-1.80072	2.74399	0.511668
ENSGALG00000015412	ARL13B	1	623.501	-0.137416	0.195157	0.481352
ENSGALG00000052108		1	3.4039	-2.45864	1.50077	0.10137
ENSGALG00000042944		1	3.43265	0.430063	1.12576	0.702445
ENSGALG00000015413	STX19	1	7.08055	-0.29539	1.08321	0.785085
ENSGALG00000012975	IQSEC3	1	163.046	-0.0785147	0.438398	0.857864
ENSGALG00000019361	TAFA2	1	409.61	-2.59696	0.799119	0.00115494
ENSGALG00000049735		1	4.05542	-2.87091	1.58567	0.0702139
ENSGALG00000035803	THRSP	1	2.0771	1.90759	1.79526	0.287977
ENSGALG00000016833	F7	1	14.781	0.745714	0.64974	0.251087
ENSGALG00000030024	USP15	1	4778.65	-0.332602	0.192394	0.0838528
ENSGALG00000055000	KCTD14	1	41.8208	0.893076	0.443515	0.0440484
ENSGALG00000015414	NSUN3	1	265.161	-0.372409	0.20902	0.0748
ENSGALG00000000091	INTS4	1	1750.13	0.00917243	0.165431	0.955783
ENSGALG00000016834	MCF2L	1	602.452	0.398823	0.216432	0.0653703
ENSGALG00000041949	AAMDC	1	855.356	0.0920157	0.191438	0.630762
ENSGALG00000040949		1	2.01492	3.18773	1.85875	0.086347
ENSGALG00000015418		1	17.877	-0.116458	0.851208	0.891177
ENSGALG00000050046		1	11.2519	0.160459	0.776193	0.836225
ENSGALG00000041644	ATP11A	1	2992.86	-0.978417	0.305673	0.00137016
ENSGALG00000019215	ARL6	1	467.701	-0.214693	0.189922	0.258296
ENSGALG00000009795	MON2	1	2667.7	0.216808	0.172026	0.207554
ENSGALG00000024077		1	588.012	-0.601962	0.253206	0.0174369
ENSGALG00000039068	RSF1	1	2101.88	0.160572	0.159981	0.315526
ENSGALG00000018237	MIRLET7I	1	3.43676	-0.38482	1.19939	0.748328
ENSGALG00000009805	PPM1H	1	136.893	-1.38662	0.282525	9.20381e-07
ENSGALG00000040567	AVPR1A	1	1.10527	0.811926	2.51703	0.747019
ENSGALG00000039302	MINA	1	1411.54	-0.108093	0.190189	0.5698
ENSGALG00000016836	TUBGCP3	1	1578.55	0.147302	0.163968	0.368993
ENSGALG00000009815	TMEM5	1	554.27	-0.365941	0.206806	0.0768126
ENSGALG00000009825	SRGAP1	1	3562.4	-0.0627938	0.217555	0.772862
ENSGALG00000016837		1	567.16	-0.344625	0.210052	0.100867
ENSGALG00000019291		1	1.12066	-2.47052	2.55108	0.332835
ENSGALG00000049379		1	1035.07	-0.857477	0.307444	0.00528631
ENSGALG00000050064		1	8.75602	-0.545985	1.01822	0.591809
ENSGALG00000008574	CLNS1A	1	4695.86	-0.336999	0.225115	0.134391
ENSGALG00000019290	SLC6A12	1	9.76502	0.730531	1.159	0.528492
ENSGALG00000036798	COL4A1	1	12232.2	0.0974651	0.283393	0.730905
ENSGALG00000048564	gga-mir-12215	1	0	NA	NA	NA
ENSGALG00000012985	SLC6A13	1	227.476	-0.320927	1.53199	NA
ENSGALG00000027682	KICS2	1	870.141	-0.299598	0.205813	0.145481
ENSGALG00000031734	AQP11	1	121.524	0.595004	0.26	0.0221099
ENSGALG00000053194		1	3930.98	-0.649994	0.184808	0.000436238
ENSGALG00000049865	RPL18A	1	13652.2	0.000309813	0.248133	0.999004
ENSGALG00000025464		1	32.95	-0.268677	0.428801	0.530936
ENSGALG00000000681	PAK1	1	571.302	0.233178	0.180797	0.197147
ENSGALG00000009835	XPOT	1	4516.72	-0.122546	0.171235	0.474203
ENSGALG00000012986	KDM5A	1	2911.37	0.0855664	0.207026	0.679377
ENSGALG00000016843	COL4A2	1	8853.33	-0.0694569	0.348007	0.841805
ENSGALG00000012987	CCDC77	1	493.452	-0.0431079	0.23609	0.855119
ENSGALG00000012988	B4GALNT3	1	412.665	-0.313924	0.413077	0.447276
ENSGALG00000012989	NINJ2	1	1204.58	-1.73353	0.17805	2.11252e-22
ENSGALG00000000690	GDPD4	1	499.216	1.23902	0.251178	8.10421e-07
ENSGALG00000009840	TBK1	1	1725.95	-0.0308779	0.202398	0.878745
ENSGALG00000031450	MYO7A	1	3736.24	0.2121	0.271042	0.433899
ENSGALG00000012992	WNK1	1	8582.63	-0.992775	0.771388	0.198095
ENSGALG00000040478	CAPN5	1	521.179	-0.321485	0.200709	0.109212
ENSGALG00000016844	RAB20	1	561.26	0.327948	0.195542	0.0935188
ENSGALG00000000755	ACER3	1	1976.84	0.49741	0.184751	0.00709547
ENSGALG00000009842	RASSF3	1	5818.6	-1.23955	0.166782	1.06827e-13
ENSGALG00000048826		1	0	NA	NA	NA
ENSGALG00000016845	NAXD	1	1911.89	-0.345894	0.142596	0.0152795
ENSGALG00000000761	TSKU	1	1939.59	0.624136	0.181553	0.000586546
ENSGALG00000000808		1	18.2692	0.0741727	0.639684	0.90769
ENSGALG00000009856	GNS	1	8253.64	0.0614898	0.195416	0.75302
ENSGALG00000009859		1	102.959	0.248103	0.259433	0.338908
ENSGALG00000039171	RAD52	1	545.679	-0.255739	0.216972	0.23853
ENSGALG00000028325		1	0	NA	NA	NA
ENSGALG00000051646		1	0	NA	NA	NA
ENSGALG00000000818		1	204.393	2.67025	0.368286	4.15245e-13
ENSGALG00000038551		1	378.415	0.28716	0.210164	0.171824
ENSGALG00000039209	WIF1	1	48.9317	1.61923	0.485813	0.000859062
ENSGALG00000016847	CARS2	1	1443.64	-0.034236	0.174829	0.844747
ENSGALG00000047223		1	392.762	0.00135408	0.227675	0.995255
ENSGALG00000052067		1	36.1962	-0.00437629	0.394994	0.99116
ENSGALG00000009873	LEMD3	1	1175.03	-0.021414	0.180673	0.905653
ENSGALG00000000830		1	207.03	0.0612873	0.249527	0.805981
ENSGALG00000028556		1	5.66662	0.90108	1.01277	0.373619
ENSGALG00000000838	THAP12	1	733.125	0.0416743	0.187871	0.824451
ENSGALG00000026661	MSRB3	1	5364.61	-1.26559	0.197916	1.6098e-10
ENSGALG00000047874		1	0	NA	NA	NA
ENSGALG00000000839	WNT11	1	1167.02	-1.18918	0.284976	3.00718e-05
ENSGALG00000025357	gga-mir-1736	1	0.100757	0.710792	4.07651	0.86158
ENSGALG00000016849	ING1	1	2138.4	-0.0737512	0.168154	0.660957
ENSGALG00000015435		1	1721.92	-0.687653	0.175269	8.7303e-05
ENSGALG00000030125	ANKRD10	1	1727.79	0.405165	0.211196	0.0550563
ENSGALG00000009875	HMGA2	1	1946.5	0.0417216	0.219713	0.849395
ENSGALG00000000845	UVRAG	1	496.689	-0.197141	0.23131	0.394058
ENSGALG00000015437	MPC2	1	3513.75	-0.653328	0.248885	0.00866434
ENSGALG00000019358	LLPH	1	2647.54	-0.0950101	0.268741	0.723685
ENSGALG00000031009	ARHGEF7	1	2064.59	-0.121875	0.201467	0.54522
ENSGALG00000012994	ERC1	1	1466.46	-0.0697794	0.253931	0.783473
ENSGALG00000015438	MPZL1	1	289.727	0.256341	0.212033	0.226675
ENSGALG00000009879		1	2138.68	0.189969	0.173854	0.274529
ENSGALG00000040275	RCSD1	1	8639.03	0.620673	0.181521	0.000627841
ENSGALG00000051023		1	0	NA	NA	NA
ENSGALG00000049398		1	0.100757	0.710792	4.07651	0.86158
ENSGALG00000030353	SOX1	1	0	NA	NA	NA
ENSGALG00000009885	HELB	1	750.781	-0.0584773	0.26931	0.828101
ENSGALG00000012998	WNT5B	1	277.323	0.0636908	0.339795	0.851316
ENSGALG00000025412	gga-mir-1632	1	0	NA	NA	NA
ENSGALG00000052140		1	0.100757	0.710792	4.07651	0.86158
ENSGALG00000040426	CREG1	1	2729.23	0.0937265	0.332075	0.777756
ENSGALG00000051579		1	0.0991028	-1.11334	4.06938	0.784401
ENSGALG00000032159	FBXL14	1	280.617	-0.408078	0.226177	0.0711931
ENSGALG00000015441	CD247	1	54.8117	0.792367	0.428472	0.0644165
ENSGALG00000035533	ADIPOR2	1	1224.81	-0.262905	0.167362	0.116211
ENSGALG00000000871	ART1	1	1.45918	-1.47681	1.8068	0.413722
ENSGALG00000050613		1	0	NA	NA	NA
ENSGALG00000009895	GRIP1	1	579.736	-0.176384	0.258934	0.49575
ENSGALG00000048470		1	0.831025	-1.23369	2.72487	0.650728
ENSGALG00000027166	ART7B	1	53.7986	-3.70519	0.533237	3.69248e-12
ENSGALG00000049591		1	0	NA	NA	NA
ENSGALG00000050358		1	0	NA	NA	NA
ENSGALG00000015446	POU2F1	1	380.695	-0.239612	0.390601	0.539584
ENSGALG00000039979		1	0	NA	NA	NA
ENSGALG00000028988	ART7C	1	1.33365	-2.06082	2.05775	0.316589
ENSGALG00000054160		1	0	NA	NA	NA
ENSGALG00000006443	MADPRT1	1	26.3393	-0.534657	0.449572	0.234338
ENSGALG00000048183		1	0	NA	NA	NA
ENSGALG00000033879		1	6590.32	-0.0750084	0.158073	0.635131
ENSGALG00000000868	RNF121	1	888.751	-0.0803236	0.189626	0.671866
ENSGALG00000036964		1	52.5369	2.18796	0.404506	6.33865e-08
ENSGALG00000050195		1	0	NA	NA	NA
ENSGALG00000035351		1	0.535371	0.448903	3.06976	0.883737
ENSGALG00000053439		1	0	NA	NA	NA
ENSGALG00000009901	DYRK2	1	2401.42	-0.940949	0.261863	0.000326534
ENSGALG00000013008	CHUNK-1	1	16.2484	1.02305	0.586958	0.0813382
ENSGALG00000049342		1	0.290744	-1.33585	4.06242	0.742283
ENSGALG00000050730		1	2.79067	0.979066	1.67146	0.55804
ENSGALG00000017493		1	425.427	-0.126483	0.1753	0.470588
ENSGALG00000026214	LRTM2	1	79.385	1.82203	0.514127	0.000394219
ENSGALG00000009903	IFNG	1	0.905906	-1.48517	2.65632	0.576087
ENSGALG00000050039		1	10.8996	0.220984	0.723561	0.760052
ENSGALG00000050486		1	0	NA	NA	NA
ENSGALG00000053931		1	4.16494	1.41542	1.15538	0.220549
ENSGALG00000048127		1	0	NA	NA	NA
ENSGALG00000013007		1	36.641	4.51852	0.745283	1.33759e-09
ENSGALG00000001258	NUMA1	1	7253.94	-0.0273497	0.194615	0.888239
ENSGALG00000053432		1	0	NA	NA	NA
ENSGALG00000046771		1	1.23198	2.12858	2.4967	0.393904
ENSGALG00000046920		1	0.947731	-1.91215	2.7351	0.484481
ENSGALG00000009904	IL22	1	0	NA	NA	NA
ENSGALG00000054905		1	0	NA	NA	NA
ENSGALG00000043931		1	1.56167	1.05725	2.06134	0.608025
ENSGALG00000015453	STYXL2	1	2329.27	-0.532835	0.304431	0.0800731
ENSGALG00000047336		1	0	NA	NA	NA
ENSGALG00000044138	GPA33	1	0	NA	NA	NA
ENSGALG00000016852	TNFSF13B	1	7.2379	0.0875606	0.845366	0.917505
ENSGALG00000009905	MDM1	1	1080.85	0.260368	0.156413	0.0959888
ENSGALG00000050288	DCP1B	1	612.676	0.795632	0.165932	1.6273e-06
ENSGALG00000019211	MAEL	1	18.148	0.599961	0.520509	0.249057
ENSGALG00000016853	ABHD13	1	1413.96	-0.0251371	0.175897	0.886363
ENSGALG00000016854	LIG4	1	446.857	0.341518	0.175187	0.0512421
ENSGALG00000026994		1	15.4548	2.95264	0.741909	6.89761e-05
ENSGALG00000009927	RAP1B	1	5987.47	0.063117	0.224502	0.778601
ENSGALG00000050660		1	5.62235	-2.1991	1.0985	0.0452932
ENSGALG00000052158		1	1.19144	-2.75246	2.11937	0.194042
ENSGALG00000022762	NALF1	1	3.99186	2.90957	1.35269	0.0314802
ENSGALG00000051202		1	41.0178	0.215803	0.400371	0.589881
ENSGALG00000016855	ARGLU1	1	9576.99	0.0631419	0.139843	0.651616
ENSGALG00000050119	LAMTOR1	1	1188.85	-0.342369	0.241196	0.155764
ENSGALG00000035375	LRTOMT	1	49.7276	-0.597878	0.502827	0.234427
ENSGALG00000029175	EFNB2	1	734.305	0.219409	0.222766	0.324658
ENSGALG00000032499	ANAPC15	1	1697.81	-0.228636	0.245548	0.351788
ENSGALG00000053132		1	194.865	0.123981	0.223277	0.578704
ENSGALG00000013022	CACNA1C	1	2393	-1.54609	0.872107	0.0762586
ENSGALG00000015458	ILDR2	1	593.33	0.29694	0.24435	0.224281
ENSGALG00000017302	SLCO2B1	1	160.774	0.854585	0.319892	0.00755181
ENSGALG00000049532		1	1.38215	1.77173	2.03494	0.383943
ENSGALG00000048309		1	15.3352	0.848989	0.700715	0.225664
ENSGALG00000045327		1	7.58894	0.357418	0.854047	0.675582
ENSGALG00000053912		1	0.26714	0.789056	4.07366	0.846413
ENSGALG00000049807		1	66.0216	1.51803	0.35489	1.89023e-05
ENSGALG00000016858	SLC10A2	1	6.60288	0.312191	0.978315	0.749643
ENSGALG00000009934	NUP107	1	3659.63	-0.260772	0.196174	0.183753
ENSGALG00000048920		1	14.9158	-1.98224	0.769316	0.00997709
ENSGALG00000016859		1	543.763	-1.98016	0.241198	2.21777e-16
ENSGALG00000016860	ERCC5	1	2698.67	-0.56728	0.191392	0.00303707
ENSGALG00000016861	BIVM	1	4093.66	-0.288539	0.143312	0.0440772
ENSGALG00000030652		1	12.3943	0.976622	0.720702	0.175386
ENSGALG00000017304	PGM2L1	1	363.409	0.0262845	0.353635	0.94075
ENSGALG00000022696	KCNE3	1	19.4761	1.09591	0.700891	0.117912
ENSGALG00000016862	POGLUT2	1	4759.32	-0.419782	0.152971	0.00606581
ENSGALG00000047148	LIPT2	1	401.149	-0.238127	0.250946	0.342662
ENSGALG00000016863	TEX30	1	306.128	-0.229162	0.234623	0.328706
ENSGALG00000017307	POLD3	1	2749.67	0.0913131	0.150673	0.544492
ENSGALG00000016864	METTL21C	1	673.882	-0.0181187	0.167798	0.914012
ENSGALG00000009940	SLC35E3	1	3897.91	-0.260353	0.135918	0.0554257
ENSGALG00000015459	ZFP92	1	264.855	0.137266	0.198984	0.490299
ENSGALG00000016865	TPP2	1	3379.92	-0.00372633	0.182768	0.983734
ENSGALG00000009942	MDM2	1	1522.35	-0.217649	0.175667	0.215351
ENSGALG00000047821		1	26.8731	0.0511406	0.431621	0.905683
ENSGALG00000017308	CHRDL2	1	18.6067	-1.02547	0.564504	0.0692809
ENSGALG00000015461		1	303.726	2.29419	0.253188	1.29024e-19
ENSGALG00000016866	FGF14	1	105.843	-2.67811	0.414532	1.04314e-10
ENSGALG00000033887	IL17RA	1	1666.44	-0.430246	0.257514	0.0947677
ENSGALG00000009945	CPM	1	405.146	-0.767628	0.306001	0.0121218
ENSGALG00000016867	ITGBL1	1	2.39414	1.31126	1.73655	0.450193
ENSGALG00000017309	RNF169	1	220.716	-0.0123622	0.277781	0.964503
ENSGALG00000019036	SPCS2	1	904.713	-0.0918598	0.251499	0.714926
ENSGALG00000013026	HDHD5	1	476.808	-0.636645	0.211508	0.00261228
ENSGALG00000047875		1	979.912	-0.0516849	0.198465	0.794537
ENSGALG00000028960	NEU3	1	541.512	0.412263	0.230137	0.0732319
ENSGALG00000019355	CPSF6	1	4796.64	-0.252412	0.153425	0.0999332
ENSGALG00000016868	NALCN	1	251.462	0.935077	0.309946	0.00255369
ENSGALG00000053667		1	784.139	-0.788106	0.335075	0.0186714
ENSGALG00000042030	P4HA3	1	309.631	2.83115	0.357284	2.29827e-15
ENSGALG00000013031	CECR1	1	709.028	0.437822	0.198747	0.0276012
ENSGALG00000015464	PTGFRN	1	1163.73	-0.391916	0.253084	0.121487
ENSGALG00000016870	TMTC4	1	1065.83	-0.202802	0.300338	0.49952
ENSGALG00000017312	PPME1	1	3085.62	-0.0582379	0.150349	0.698497
ENSGALG00000022758	GGACT	1	153.625	-0.304047	0.244257	0.213213
ENSGALG00000009963	LYZ	1	1.09675	-0.777145	2.91522	0.789791
ENSGALG00000029135	YEATS4	1	2056.42	-0.121055	0.258223	0.639211
ENSGALG00000016872	PCCA	1	2517.62	-0.985742	0.166991	3.57067e-09
ENSGALG00000036738	IGSF3	1	1981.24	0.0283059	0.212517	0.89404
ENSGALG00000009966	FRS2	1	401.746	-0.0683727	0.304943	0.82259
ENSGALG00000013034	CECR2	1	1286.83	0.42282	0.392752	0.281678
ENSGALG00000009975	CCT2	1	13304.4	-0.442891	0.26555	0.0953511
ENSGALG00000017314		1	192.367	-0.0285025	0.229401	0.901119
ENSGALG00000015473	ADPRH	1	1430.58	0.0955602	0.180667	0.596853
ENSGALG00000013036	ATP6V1E1	1	3283.06	-0.219441	0.225688	0.330891
ENSGALG00000052611		1	136.533	0.0622436	0.283876	0.826445
ENSGALG00000017316	UCP3	1	19.1881	0.0141706	0.567234	0.980069
ENSGALG00000041083	ZIC2	1	0.401375	0.861297	4.01413	0.830105
ENSGALG00000015474	CD80	1	167.271	0.454577	0.256871	0.0767818
ENSGALG00000047495	LRRC10	1	1028.42	0.516593	0.175809	0.00329936
ENSGALG00000017317	DNAJB13	1	37.4345	0.163398	0.379015	0.666386
ENSGALG00000013037	BCL2L13	1	2886.57	-0.816598	0.182987	8.09717e-06
ENSGALG00000010018	CTSEAL	1	86.3139	0.558501	0.453051	0.217667
ENSGALG00000017318	PAAF1	1	846.071	0.117993	0.21773	0.587873
ENSGALG00000024480	TIMMDC1	1	2471.04	-0.280592	0.192573	0.145097
ENSGALG00000034197	ZIC5	1	0	NA	NA	NA
ENSGALG00000013039	BID	1	3172.4	0.0529622	0.272321	0.845797
ENSGALG00000015480	POGLUT1	1	4077.76	0.349638	0.154216	0.0233782
ENSGALG00000010029	BEST3	1	221.646	0.65025	0.364615	0.0745237
ENSGALG00000016875	CLYBL	1	174.512	-0.221122	0.285655	0.438878
ENSGALG00000009959		1	4959.78	-0.34231	0.171788	0.0463019
ENSGALG00000016878	TM9SF2	1	5894.11	0.0514853	0.131297	0.694963
ENSGALG00000025782	gga-mir-6616	1	0.100757	0.710792	4.07651	0.86158
ENSGALG00000047542	COA4	1	66.7312	0.0709148	0.289858	0.806725
ENSGALG00000047777	gga-mir-2984	1	0.968578	-1.30073	2.57395	0.613316
ENSGALG00000037655	BCL9	1	1653.32	0.0537713	0.353095	0.878962
ENSGALG00000017319	MRPL48	1	2609.38	-0.485198	0.19268	0.0117972
ENSGALG00000043947		1	20.6252	0.239223	0.604942	0.692513
ENSGALG00000016880	UBAC2	1	2303.92	0.0808711	0.187982	0.667045
ENSGALG00000017320	RAB6A	1	3802.31	-0.102147	0.151454	0.500032
ENSGALG00000019352		1	6.74181	0.572705	0.874793	0.512677
ENSGALG00000015485	ACP6	1	661.824	0.166988	0.179113	0.35118
ENSGALG00000010042	CNOT2	1	2332.33	0.0183782	0.187945	0.922103
ENSGALG00000017321	PLEKHB1	1	653.906	0.579619	0.221865	0.00898857
ENSGALG00000039452	GJA5	1	15325.6	-1.69825	0.321733	1.30285e-07
ENSGALG00000015488	GJA8	1	957.298	-2.68124	0.337181	1.83628e-15
ENSGALG00000017323	FAM168A	1	455.358	-0.0667324	0.175523	0.703804
ENSGALG00000013042	MICAL3	1	7544.43	-0.562559	0.426901	0.187579
ENSGALG00000015491	GPR89A	1	1281.94	-0.132934	0.188364	0.480357
ENSGALG00000010044	KCNMB4	1	66.6713	1.88083	0.424899	9.57616e-06
ENSGALG00000016881	GPR183	1	212.289	0.680545	0.262336	0.00948191
ENSGALG00000022750	GPR18	1	36.7395	0.0101629	0.686873	0.988195
ENSGALG00000044739		1	0.839546	0.809988	2.36806	0.732316
ENSGALG00000049427	RELT	1	262.989	0.30217	0.245648	0.218662
ENSGALG00000010049	PTPRB	1	1095.44	1.57118	0.318402	8.03288e-07
ENSGALG00000017326	ARHGEF17	1	3311.76	0.130835	0.220535	0.553007
ENSGALG00000016883	DOCK9	1	2656.59	0.65553	0.247753	0.00814742
ENSGALG00000017327	P2RY6	1	150.732	1.05483	0.307501	0.000602843
ENSGALG00000051948		1	1.27093	1.90272	2.46356	0.43991
ENSGALG00000017329	FCHSD2	1	799.696	-0.0329305	0.245665	0.893366
ENSGALG00000025198	gga-mir-1708	1	0.399968	-2.29404	3.96635	0.56301
ENSGALG00000015492	PDZK1	1	48.4332	-0.195346	0.37931	0.606551
ENSGALG00000017330	RPS3	1	36946.4	0.0475948	0.210977	0.821519
ENSGALG00000019286		1	791.384	-0.0859683	0.158763	0.588171
ENSGALG00000013045	TUBA8B	1	2.55685	-1.00901	1.59549	0.527116
ENSGALG00000013056		1	3.88302	-0.756277	1.26408	0.549651
ENSGALG00000040855	PTPRR	1	6.47619	2.24784	0.990866	0.0232952
ENSGALG00000017817	SNORD15	1	2.07847	-0.581064	1.64687	0.724217
ENSGALG00000017818	SNORD15	1	2.33774	0.182348	1.35462	0.892919
ENSGALG00000025564	SNORD15	1	1.74804	0.918382	1.91329	0.631227
ENSGALG00000016884	SLC15A1	1	19.4953	1.36688	0.555026	0.0137882
ENSGALG00000013057		1	345.886	0.531687	0.192421	0.00572481
ENSGALG00000011214	SERPINH1	1	15944.6	0.205062	0.161477	0.204114
ENSGALG00000010152	TSPAN8	1	7.65572	2.64287	0.955323	0.00566665
ENSGALG00000034967	GDPD5	1	847.314	0.0682581	0.175183	0.696804
ENSGALG00000010163	LGR5	1	501.726	0.378238	0.25186	0.133155
ENSGALG00000010177	ZFC3H1	1	3771.18	-0.075887	0.219549	0.729606
ENSGALG00000050257		1	8.00619	-0.0843925	0.913607	0.926402
ENSGALG00000041783	TMEM19	1	826.79	0.0887275	0.155159	0.567425
ENSGALG00000017332	KLHL35	1	411.817	0.556707	0.240344	0.0205424
ENSGALG00000007441	MAP6	1	401.239	1.00006	0.179884	2.70559e-08
ENSGALG00000010183	RAB21	1	3503.1	-0.0281334	0.157576	0.8583
ENSGALG00000045122	AKR1B1	1	8389.97	-0.331433	0.193492	0.0867308
ENSGALG00000014170	MOGAT2	1	57.6081	0.239093	0.347731	0.491717
ENSGALG00000016885	STK24	1	745.653	-0.097341	0.194906	0.617481
ENSGALG00000040418	DGAT2	1	46.395	1.17938	0.385329	0.00220819
ENSGALG00000010190	TBC1D15	1	2190.78	0.261311	0.20039	0.192229
ENSGALG00000032614	AT2	1	0	NA	NA	NA
ENSGALG00000051726		1	0	NA	NA	NA
ENSGALG00000019284		1	2372.19	-0.150117	0.195858	0.443404
ENSGALG00000049536		1	2.96696	0.456313	1.36396	0.737965
ENSGALG00000022702	CHRNA10	1	1.09516	-0.235428	1.89943	0.901357
ENSGALG00000053854	AKR1E2	1	540.804	0.397332	0.174558	0.0228333
ENSGALG00000040018	NUP98	1	3490.86	-0.101268	0.140823	0.472069
ENSGALG00000054808		1	0.337414	-0.323106	4.05558	0.9365
ENSGALG00000003466		1	621.364	0.0870008	0.176551	0.622167
ENSGALG00000010198	TPH2	1	33.6424	1.17154	0.441347	0.00794362
ENSGALG00000010200	TRHDE	1	175.285	-1.18517	0.259666	5.01367e-06
ENSGALG00000054210		1	2.98762	-0.0768916	1.23937	0.95053
ENSGALG00000016886	FARP1	1	5733.52	-0.570326	0.214034	0.00770698
ENSGALG00000049903		1	116.813	0.272261	0.277866	0.327171
ENSGALG00000015494	HTR1F	1	0.836553	3.04337	3.09565	0.325553
ENSGALG00000010204	KCNC2	1	56.1066	1.5969	0.352818	6.00699e-06
ENSGALG00000013069	BPGM	1	3992.97	0.120918	0.175514	0.490865
ENSGALG00000015495	POU1F1	1	2.9423	0.323068	1.27622	0.800156
ENSGALG00000033471	CALD1	1	5859.72	1.37364	0.214393	1.48266e-10
ENSGALG00000010208	CAPS2	1	17.0701	-0.156731	0.575149	0.785234
ENSGALG00000047516		1	718.104	-0.198554	0.1974	0.314489
ENSGALG00000015496	CHMP2B	1	3920.47	0.121254	0.191098	0.525747
ENSGALG00000051034		1	0.402791	1.94908	4.01711	0.627538
ENSGALG00000013072	AKR1B10	1	747.126	0.760033	0.27339	0.00543532
ENSGALG00000010222		1	6.01851	-0.167167	0.907349	0.853828
ENSGALG00000015497	VGLL3	1	113.501	0.0360218	0.362992	0.920951
ENSGALG00000027762	PGAP2	1	1020.73	0.0625955	0.174742	0.720181
ENSGALG00000028186	RERG	1	917.599	-0.748649	0.185516	5.44871e-05
ENSGALG00000010223		1	0	NA	NA	NA
ENSGALG00000043393	CADM2	1	615.701	-0.0800591	0.306564	0.793977
ENSGALG00000010224	GLIPR1L	1	225.173	2.25842	0.252842	4.17891e-19
ENSGALG00000013085	PTPRO	1	928.558	-1.60602	0.21649	1.18519e-13
ENSGALG00000026995	RHOG	1	125.64	0.0933398	0.315671	0.767469
ENSGALG00000041762	STIM1	1	989.961	0.200257	0.200008	0.316709
ENSGALG00000010227	KRR1	1	2003.64	-0.0587457	0.24058	0.807088
ENSGALG00000013091	EPS8	1	2299.54	-0.851116	0.15523	4.18368e-08
ENSGALG00000027982		1	0.100757	0.710792	4.07651	0.86158
ENSGALG00000013092	STRAP	1	6302.07	-0.0374375	0.206928	0.85643
ENSGALG00000025177	gga-mir-1806	1	0.19986	-0.178853	4.0654	0.964909
ENSGALG00000050351		1	0	NA	NA	NA
ENSGALG00000049771		1	0.372059	1.95961	4.0167	0.625646
ENSGALG00000034788	PHLDA1	1	341.455	-1.1591	0.236025	9.06406e-07
ENSGALG00000049646	gga-mir-12213	1	0	NA	NA	NA
ENSGALG00000042771	GBE1	1	1775.26	-0.381638	0.172594	0.0270227
ENSGALG00000017350	RRM1	1	8672.53	-0.404086	0.192783	0.0360765
ENSGALG00000013095	DERA	1	1565.32	-0.502256	0.188404	0.00767957
ENSGALG00000010238	NAP1L1	1	19339.2	-0.202154	0.234306	0.388259
ENSGALG00000013097	SLC15A5	1	23.2807	1.66858	0.636609	0.00876608
ENSGALG00000025199	gga-mir-1555	1	20.4927	-1.38669	0.692583	0.0452635
ENSGALG00000027248	Metazoa_SRP	1	0.201763	-1.33585	4.06242	0.742283
ENSGALG00000033418		1	0	NA	NA	NA
ENSGALG00000025630	U6	1	0	NA	NA	NA
ENSGALG00000032430	IPO5	1	14494.1	-0.0118515	0.152629	0.938108
ENSGALG00000013098	MGST1	1	2488.28	0.0104766	0.169095	0.950597
ENSGALG00000015511	ROBO1	1	1525.96	0.791104	0.200127	7.71735e-05
ENSGALG00000029040		1	6.78993	-0.584287	1.0406	0.574465
ENSGALG00000019030		1	3.96092	-1.29817	1.37994	0.346835
ENSGALG00000031533		1	0.135651	0.789056	4.07366	0.846413
ENSGALG00000044591	OR51E2	1	0.26714	0.789056	4.07366	0.846413
ENSGALG00000053527		1	0	NA	NA	NA
ENSGALG00000054014		1	1.17139	-1.38065	2.18277	0.527044
ENSGALG00000053623		1	2.31854	0.923157	1.47936	0.532612
ENSGALG00000048553	OR52R1	1	2.19412	-0.843574	1.90435	0.657786
ENSGALG00000030885	OR51M1	1	1.40663	-1.67852	2.2699	0.459622
ENSGALG00000035309	HBE	1	120152	-0.50044	1.72468	NA
ENSGALG00000047152	HBBA	1	0.100757	0.710792	4.07651	0.86158
ENSGALG00000033769		1	223.086	0.132259	0.220886	0.549329
ENSGALG00000036358	LMO3	1	26.7471	4.25484	0.678339	3.55446e-10
ENSGALG00000010246	OSBPL8	1	2388.21	0.0989604	0.155818	0.525362
ENSGALG00000052767		1	92.9523	-0.254023	2.01286	NA
ENSGALG00000028273	HBE1	1	784.69	-0.329097	1.40911	0.815334
ENSGALG00000017347	HBBR	1	188331	-0.512382	1.71252	NA
ENSGALG00000015519	ROBO2	1	170.528	1.25663	0.324837	0.000109514
ENSGALG00000010253	ZDHHC17	1	1377.79	0.0974767	0.211064	0.6442
ENSGALG00000017343	FOLR1	1	13.0805	0.184358	0.643014	0.774335
ENSGALG00000016889	RAP2A	1	976.234	-0.148809	0.191501	0.43712
ENSGALG00000017342		1	1.77496	1.5539	1.68212	0.355605
ENSGALG00000044425		1	0.848629	-1.66633	3.30841	0.614498
ENSGALG00000017341		1	0.605288	-2.82772	3.99168	0.478695
ENSGALG00000025472	5S_rRNA	1	0	NA	NA	NA
ENSGALG00000013112	RERGL	1	388.194	0.734323	0.194665	0.000161784
ENSGALG00000048974		1	0.300866	-1.96344	4.04236	0.627168
ENSGALG00000017299	RPS11	1	24729.2	-0.152804	0.218181	0.483706
ENSGALG00000027990		1	0.135651	0.789056	4.07366	0.846413
ENSGALG00000015662		1	2.42787	3.30546	2.62423	0.207817
ENSGALG00000021766		1	27.1813	0.0542618	0.556753	0.92236
ENSGALG00000021748		1	13.9354	-0.44524	0.671713	0.507431
ENSGALG00000013117	PIK3C2G	1	71.0865	0.416383	0.436167	0.339759
ENSGALG00000044391	RBM11	1	71.9614	-0.229961	0.284695	0.419237
ENSGALG00000003416	FHIP1B	1	1435.16	-0.336688	0.228486	0.140599
ENSGALG00000029921	CSRP2	1	1077.18	1.13554	0.380936	0.00287387
ENSGALG00000015675		1	433.164	0.208307	0.280786	0.458164
ENSGALG00000016890	MBNL2	1	1141.52	0.423386	0.224132	0.0588916
ENSGALG00000013123	PLCZ1	1	0.875608	3.141	2.54582	0.217282
ENSGALG00000022704		1	31.8734	-0.643398	0.478068	0.178357
ENSGALG00000019201	HSPA13	1	631.091	0.165762	0.196548	0.399024
ENSGALG00000039837	CCKBR	1	43.7443	-0.594644	0.384466	0.121941
ENSGALG00000036106	SMPD1	1	1026.48	0.243688	0.237737	0.305347
ENSGALG00000031340	E2F7	1	441.529	-0.038609	0.216511	0.858469
ENSGALG00000040926	SAMSN1	1	50.4554	1.2707	0.386947	0.00102381
ENSGALG00000046164	APBB1	1	2678.3	-0.0820061	0.188185	0.663002
ENSGALG00000013125	CAPZA3	1	0	NA	NA	NA
ENSGALG00000013134	PLEKHA5	1	1027.49	0.576852	0.23918	0.0158742
ENSGALG00000034004	TRIM3	1	4122.76	0.182042	0.150453	0.226294
ENSGALG00000028720		1	0.930678	-1.24313	2.38326	0.601941
ENSGALG00000010311	NAV3	1	567.349	1.82312	0.407818	7.80675e-06
ENSGALG00000015681	NRIP1	1	1013.4	0.00958494	0.27259	0.97195
ENSGALG00000037839	ARFIP2	1	1544.38	-0.0353627	0.157011	0.821805
ENSGALG00000038026	AEBP2	1	1028.2	-0.099169	0.14499	0.493993
ENSGALG00000015693	USP25	1	2573.49	-0.241907	0.168108	0.15015
ENSGALG00000013143	PDE3A	1	1954.83	-1.10777	0.401849	0.00583901
ENSGALG00000042572		1	363.737	0.0409053	0.273009	0.880898
ENSGALG00000017336		1	920.971	-0.00478466	0.168115	0.977295
ENSGALG00000018242	gga-mir-99a	1	0.468903	-0.321087	3.8979	0.934349
ENSGALG00000013154	SLCO1C1	1	1.36995	-0.491402	1.957	0.801737
ENSGALG00000048769		1	183.296	0.156651	0.254874	0.538805
ENSGALG00000018243	MIRLET7C	1	0.603386	-1.64312	2.99413	0.583156
ENSGALG00000018244	gga-mir-125b-2	1	3.79889	0.860438	1.11783	0.441454
ENSGALG00000031642	ILK	1	5915.57	0.0789881	0.21243	0.710019
ENSGALG00000050117		1	1.07786	0.822973	2.48292	0.740302
ENSGALG00000015701	CXADR	1	2856.82	-1.24513	0.24647	4.37512e-07
ENSGALG00000028290	C1H21ORF91	1	575.193	0.298797	0.20223	0.139539
ENSGALG00000019277	SLCO1B3	1	8.10043	4.51936	1.40008	0.00124686
ENSGALG00000046371		1	1267.55	-0.181944	0.268472	0.49796
ENSGALG00000015720	CHODL	1	319.922	1.3892	0.871434	0.110903
ENSGALG00000029731	TPP1	1	4500	-0.0600669	0.257303	0.815414
ENSGALG00000025438	gga-mir-1600	1	63.2798	0.657701	0.443375	0.137969
ENSGALG00000017334		1	3101.75	0.44943	0.723055	0.534224
ENSGALG00000015730	TMPRSS15	1	1.66825	1.88135	1.78002	0.290545
ENSGALG00000019276		1	3.2878	-1.13803	1.21055	0.347168
ENSGALG00000052484		1	0.989427	-1.01671	2.55119	0.690244
ENSGALG00000053300		1	0	NA	NA	NA
ENSGALG00000048907		1	0	NA	NA	NA
ENSGALG00000052645		1	71.242	1.0913	0.298207	0.000252669
ENSGALG00000047472		1	62.4147	1.39224	0.596032	0.019499
ENSGALG00000015737	NCAM2	1	141.22	1.99592	0.359138	2.73631e-08
ENSGALG00000017333	LCMT2	1	1224.89	-0.0990334	0.152533	0.516172
ENSGALG00000054620		1	0.100757	0.710792	4.07651	0.86158
ENSGALG00000031293	SLCO1A2	1	0.736043	1.22095	3.41091	0.720378
ENSGALG00000047728		1	0	NA	NA	NA
ENSGALG00000046958		1	0.135651	0.789056	4.07366	0.846413
ENSGALG00000050918		1	0.290744	-1.33585	4.06242	0.742283
ENSGALG00000017896	U6	1	0	NA	NA	NA
ENSGALG00000047511		1	0.135651	0.789056	4.07366	0.846413
ENSGALG00000018245	gga-mir-155	1	0	NA	NA	NA
ENSGALG00000015742	MRPL39	1	1836.25	-0.58426	0.237601	0.0139325
ENSGALG00000041094	SYT1	1	145.687	1.22201	0.299726	4.56012e-05
ENSGALG00000013168	IAPP	1	9.51883	2.86042	1.11491	0.0102997
ENSGALG00000013173	PYROXD1	1	399.178	-0.0281298	0.19244	0.883784
ENSGALG00000015746	JAM2	1	161.263	0.830681	0.258244	0.00129694
ENSGALG00000013174	RECQL	1	919.944	-0.235394	0.164063	0.15135
ENSGALG00000010320	PAWR	1	861.904	-1.05764	0.197575	8.645e-08
ENSGALG00000046717		1	0.0991028	-1.11334	4.06938	0.784401
ENSGALG00000010325	PPP1R12A	1	7049.83	-0.137317	0.203659	0.500153
ENSGALG00000015751	ATP5PF	1	7418.07	-0.295773	0.175088	0.0911659
ENSGALG00000033855	GOLT1B	1	1747.73	0.187285	0.179571	0.296967
ENSGALG00000015763	GABPA	1	5726.74	-0.137281	0.154729	0.374952
ENSGALG00000026490	RPS16	1	20816.3	-0.13128	0.219382	0.549567
ENSGALG00000010342	OTOGL	1	196.977	-1.22468	0.510176	0.0163727
ENSGALG00000015770	APP	1	26037.2	0.0634097	0.250066	0.799826
ENSGALG00000016891		1	0.504035	0.649983	3.74525	0.86222
ENSGALG00000041311		1	0	NA	NA	NA
ENSGALG00000013177	BCAT1	1	867.972	-0.487486	0.216741	0.0245018
ENSGALG00000025906	HS6ST3	1	179.703	-0.936939	0.31163	0.00264213
ENSGALG00000051633		1	0.300866	-1.96344	4.04236	0.627168
ENSGALG00000034146		1	36.93	-1.10411	0.434621	0.0110729
ENSGALG00000051132		1	13.9484	-0.750335	0.736202	0.30811
ENSGALG00000016893	UGGT2	1	3588.04	-0.640936	0.301062	0.0332609
ENSGALG00000010935	PTPRQ	1	38.0386	-0.534913	0.454897	0.239636
ENSGALG00000010936	MYF6	1	2.92057	-5.0715	2.199	0.0210952
ENSGALG00000016894	DNAJC3	1	5622.08	0.113057	0.142055	0.426108
ENSGALG00000053764	CYYR1	1	258.978	0.155908	0.212301	0.462721
ENSGALG00000028091	MYF5	1	2.94941	-1.54221	2.13818	0.470743
ENSGALG00000010939	LIN7A	1	322.839	0.271292	0.222524	0.222786
ENSGALG00000040342	ADAMTS1	1	3272.37	0.191394	0.243378	0.431628
ENSGALG00000015795	ADAMTS5	1	285.969	-0.577866	0.404937	0.153565
ENSGALG00000055068		1	0	NA	NA	NA
ENSGALG00000048235		1	0	NA	NA	NA
ENSGALG00000050583		1	0	NA	NA	NA
ENSGALG00000053665		1	0	NA	NA	NA
ENSGALG00000050657		1	0	NA	NA	NA
ENSGALG00000051303		1	0	NA	NA	NA
ENSGALG00000027781		1	0	NA	NA	NA
ENSGALG00000010940	ACSS3	1	824.496	0.13468	0.20002	0.500736
ENSGALG00000015802	N6AMT1	1	1078.33	-0.445268	0.192164	0.0204968
ENSGALG00000016895	DZIP1	1	1015.38	0.25796	0.173187	0.136358
ENSGALG00000051667		1	0	NA	NA	NA
ENSGALG00000052622		1	0	NA	NA	NA
ENSGALG00000015804	LTN1	1	2419.94	-0.190215	0.202865	0.348426
ENSGALG00000049759		1	0	NA	NA	NA
ENSGALG00000049640		1	0	NA	NA	NA
ENSGALG00000010958	PPFIA2	1	86.9061	1.82886	0.457011	6.28649e-05
ENSGALG00000019114	CLDN10	1	4.6217	0.00587989	0.969552	0.995161
ENSGALG00000015807	RWDD2B	1	470.99	0.0302984	0.243423	0.900945
ENSGALG00000032768	SOX5	1	231.034	0.0483324	0.209364	0.817429
ENSGALG00000015813	USP16	1	2930.41	-0.270161	0.185794	0.145922
ENSGALG00000015821	CCT8	1	13335.8	-0.329014	0.243371	0.176406
ENSGALG00000028648	CCDC59	1	1289.77	-0.0839453	0.300064	0.779663
ENSGALG00000042269	METTL25	1	314.173	0.373168	0.218087	0.0870641
ENSGALG00000016896	ABCC4	1	289.648	0.510126	0.314025	0.104274
ENSGALG00000010975	TMTC2	1	380.599	0.878984	0.184135	1.80984e-06
ENSGALG00000050123		1	0	NA	NA	NA
ENSGALG00000049237	gga-mir-6608-1	1	0	NA	NA	NA
ENSGALG00000049909	gga-mir-6608-1	1	0	NA	NA	NA
ENSGALG00000049744	gga-mir-6608-1	1	0	NA	NA	NA
ENSGALG00000010992	SLC6A15	1	357.36	2.12626	0.398047	9.2059e-08
ENSGALG00000026464		1	0	NA	NA	NA
ENSGALG00000051324		1	0.605288	-2.82772	3.99168	0.478695
ENSGALG00000027103	TSPAN19	1	4.91924	1.67424	1.14598	0.144024
ENSGALG00000013205	ETNK1	1	2044.79	0.340872	0.241936	0.158854
ENSGALG00000013210	C2CD5	1	2121.02	-0.067506	0.224602	0.763752
ENSGALG00000044478		1	107.494	2.03731	0.337076	1.50285e-09
ENSGALG00000015822		1	125.262	0.741813	0.286503	0.00961988
ENSGALG00000027213	ALX1	1	600.475	5.3883	0.378715	6.15559e-46
ENSGALG00000015828	BACH1	1	1704.22	-0.153728	0.254596	0.54597
ENSGALG00000047575		1	3.26626	5.05375	1.6874	0.00274448
ENSGALG00000027633	RASSF9	1	281.49	4.64805	0.359247	2.73569e-38
ENSGALG00000027192	NTS	1	169.371	6.37455	0.494955	5.90477e-38
ENSGALG00000035157	SOX21	1	8.99904	0.839996	0.869097	0.333786
ENSGALG00000016897	GPR180	1	556.68	-0.26992	0.189662	0.154689
ENSGALG00000013211	ST8SIA1	1	158.149	0.649474	0.287358	0.0238118
ENSGALG00000016898	TGDS	1	697.798	0.164014	0.207028	0.428226
ENSGALG00000015835	GRIK1	1	110.922	1.2665	0.280706	6.42671e-06
ENSGALG00000055024		1	0.300866	-1.96344	4.04236	0.627168
ENSGALG00000028360	MGAT4C	1	2.74585	2.03571	1.3848	0.14155
ENSGALG00000013218	C3AR1	1	77.581	1.62792	0.431577	0.000161931
ENSGALG00000045907		1	0.870278	0.764332	2.37799	0.747892
ENSGALG00000013226		1	0.739957	2.89123	2.68728	0.281974
ENSGALG00000045093		1	803.592	0.0880619	0.170162	0.604795
ENSGALG00000011168	C12orf29	1	683.229	-0.152163	0.169193	0.368469
ENSGALG00000016899	DCT	1	12.4722	1.03863	0.755219	0.169047
ENSGALG00000016900	GPC6	1	37.2689	-0.217304	0.403283	0.589998
ENSGALG00000049176		1	862.744	0.0591973	0.232829	0.799301
ENSGALG00000025670	U7	1	0.399968	-2.29404	3.96635	0.56301
ENSGALG00000049165		1	68.537	-0.60076	0.373283	0.10753
ENSGALG00000052360		1	0.869228	0.148179	2.59363	0.95444
ENSGALG00000051576		1	0.403526	-2.26485	4.02736	0.573867
ENSGALG00000016902	GPC5	1	155.397	0.558133	0.315653	0.0770302
ENSGALG00000018248	gga-mir-92-1	1	3.18423	-0.00608728	1.46361	0.996682
ENSGALG00000018249	gga-mir-19b	1	0.135651	0.789056	4.07366	0.846413
ENSGALG00000018250	gga-mir-20a	1	0	NA	NA	NA
ENSGALG00000018251	gga-mir-19a	1	0	NA	NA	NA
ENSGALG00000018252	gga-mir-18a	1	0	NA	NA	NA
ENSGALG00000013229	CMAS	1	1038.72	0.320141	0.173672	0.0652755
ENSGALG00000018253	gga-mir-17	1	0.0991028	-1.11334	4.06938	0.784401
ENSGALG00000052317		1	1.02598	-0.310295	2.18661	0.887154
ENSGALG00000052615		1	0	NA	NA	NA
ENSGALG00000048478		1	0.680591	-2.94515	3.36947	0.382081
ENSGALG00000045605		1	0.236408	1.46485	4.03931	0.716867
ENSGALG00000026361		1	51.3349	0.0658211	0.563744	0.907052
ENSGALG00000051263		1	171.642	0.130266	0.318015	0.682082
ENSGALG00000050251		1	0	NA	NA	NA
ENSGALG00000013244	ABCC9	1	1600.47	0.581099	0.383257	0.129465
ENSGALG00000055122		1	0	NA	NA	NA
ENSGALG00000054281		1	0.337414	-0.323106	4.05558	0.9365
ENSGALG00000048604		1	0.727013	0.106311	2.49101	0.965958
ENSGALG00000011177		1	455.909	-0.0326864	0.254359	0.897749
ENSGALG00000048294		1	2.457	3.53386	1.78818	0.0481281
ENSGALG00000016904	SLITRK6	1	960.736	1.11936	0.224696	6.30434e-07
ENSGALG00000046911		1	0	NA	NA	NA
ENSGALG00000051313		1	0.335511	0.576229	3.587	0.872374
ENSGALG00000016905	SLITRK1	1	6.21995	3.42917	1.22399	0.00508439
ENSGALG00000047212		1	0	NA	NA	NA
ENSGALG00000016906	SPRY2	1	794.347	0.78955	0.182572	1.52818e-05
ENSGALG00000033106	TMTC3	1	2433.62	-0.0329742	0.185851	0.859176
ENSGALG00000051466	NDFIP2	1	1640.26	-0.460973	0.154543	0.00285616
ENSGALG00000053183		1	0.836485	-2.0942	2.64508	0.428516
ENSGALG00000026373	KCNJ8	1	1470.88	1.98855	0.305774	7.85614e-11
ENSGALG00000011206	KITLG	1	82.7561	2.17727	0.347303	3.63233e-10
ENSGALG00000035836	LDHB	1	44099.2	-0.779676	0.155766	5.57358e-07
ENSGALG00000016910	RBM26	1	5249.72	-0.0833342	0.148571	0.574862
ENSGALG00000016911	OBI1	1	1998.39	0.203911	0.137664	0.138548
ENSGALG00000035441	POU4F1	1	2.28529	1.87181	1.85757	0.313616
ENSGALG00000054730		1	1.41287	2.87947	2.28515	0.207641
ENSGALG00000016912	EDNRB	1	5304.92	-3.62586	0.312518	4.0209e-31
ENSGALG00000013265	GYS2	1	2.5665	2.63644	1.686	0.117882
ENSGALG00000052474		1	0	NA	NA	NA
ENSGALG00000013273	SPX	1	0.704391	-3.05726	3.299	0.354071
ENSGALG00000016913	SLAIN1	1	12.4954	0.552828	0.650995	0.395767
ENSGALG00000011207	DUSP6	1	1466.15	-0.562253	0.202501	0.00549411
ENSGALG00000027514	SCEL	1	1895.38	-1.27648	0.202033	2.64631e-10
ENSGALG00000014011	LRMP	1	63.4786	0.364398	0.327511	0.265868
ENSGALG00000035493	POC1B	1	1135.47	-0.117188	0.177371	0.50881
ENSGALG00000044073		1	0.300617	0.426593	4.0364	0.915831
ENSGALG00000030550	ATP2B1	1	3894.45	-0.125501	0.193195	0.515947
ENSGALG00000015841	CLDN8	1	4.65428	1.08241	1.38435	0.43428
ENSGALG00000015842	TIAM1	1	1415.02	0.59193	0.243174	0.0149254
ENSGALG00000016915	MYCBP2	1	4962.36	-0.0232737	0.328825	0.943574
ENSGALG00000015844	SOD1	1	9639.61	-0.132681	0.272717	0.626602
ENSGALG00000033965	SCAF4	1	1492.27	-0.136805	0.157885	0.386227
ENSGALG00000011269	EPYC	1	1.63267	-0.101863	1.72193	0.952828
ENSGALG00000011270	KERA	1	15.9684	3.27184	1.15139	0.00448829
ENSGALG00000015879	HUNK	1	2069.29	0.23626	0.167337	0.157984
ENSGALG00000025522	gga-mir-1738	1	0.26714	0.789056	4.07366	0.846413
ENSGALG00000015884	MIS18A	1	1113.97	-0.269283	0.206046	0.191243
ENSGALG00000015887	URB1	1	1342.27	-0.0347085	0.155517	0.823394
ENSGALG00000011271	LUM	1	2527.09	5.60489	0.320064	1.16436e-68
ENSGALG00000032882	EVA1C	1	145.466	1.44378	0.265926	5.65863e-08
ENSGALG00000037962	C1H21ORF59	1	1108.53	-0.374219	0.237524	0.11514
ENSGALG00000011274	DCN	1	8576.82	0.804833	0.182023	9.79674e-06
ENSGALG00000034317	SYNJ1	1	698.46	-0.292442	0.265694	0.271039
ENSGALG00000036833	PAXBP1	1	2808.36	-0.11682	0.18658	0.531242
ENSGALG00000011276	BTG1	1	18617.6	-0.054381	0.261612	0.835331
ENSGALG00000011277	PLEKHG7	1	12.084	-0.628475	0.805726	0.435385
ENSGALG00000011280	EEA1	1	3680.09	-0.3635	0.22529	0.106641
ENSGALG00000040059	C21orf62	1	0.389847	-2.06317	4.03708	0.609313
ENSGALG00000031010	OLIG2	1	0	NA	NA	NA
ENSGALG00000041867	IFNAR2	1	2781.45	-0.00943948	0.145691	0.94834
ENSGALG00000011285		1	3773.26	-0.277378	0.133778	0.0381332
ENSGALG00000030515	UBE2N	1	6072.48	-0.294347	0.21608	0.17313
ENSGALG00000011293	MRPL42	1	960.26	-0.0380957	0.208375	0.854937
ENSGALG00000048716	FBXL3	1	1490.67	0.428137	0.161221	0.00791711
ENSGALG00000037989	IL10RB	1	376.761	0.1182	0.190856	0.535707
ENSGALG00000016917	CLN5	1	611.559	-0.409614	0.195966	0.0365967
ENSGALG00000016918	GATD3AL1	1	3691.35	0.277899	0.223206	0.213119
ENSGALG00000050619	SOCS2	1	67.0689	-0.243272	0.372581	0.513797
ENSGALG00000011297	CRADD	1	793.629	0.102852	0.171942	0.549721
ENSGALG00000016919	ACOD1	1	61.0185	0.361378	0.314616	0.250707
ENSGALG00000030363	IFNAR1	1	1194.5	0.355785	0.227834	0.118384
ENSGALG00000011309	PLXNC1	1	1432.53	0.182633	0.304485	0.548633
ENSGALG00000051914		1	3.04433	-0.702175	1.49393	0.638341
ENSGALG00000033816	KCTD12	1	895.825	-0.918998	0.248422	0.000216154
ENSGALG00000027869		1	0	NA	NA	NA
ENSGALG00000019336	CEP83	1	893.822	0.0775262	0.163565	0.635515
ENSGALG00000016920	LMO7	1	4188.89	-0.364363	0.172238	0.0343903
ENSGALG00000011320	TMCC3	1	80.7806	0.95251	0.304251	0.00174407
ENSGALG00000032660	IFNGR2	1	1940.65	-0.141982	0.141266	0.314865
ENSGALG00000042479	gga-mir-7451	1	0	NA	NA	NA
ENSGALG00000014030	DNAI7	1	76.2463	0.128027	0.320952	0.689969
ENSGALG00000034396	TMEM50B	1	1638.13	0.291223	0.148176	0.0493702
ENSGALG00000011323	SNAPC3	1	523.304	0.113403	0.225605	0.615202
ENSGALG00000011325	NDUFA12	1	4889.3	-0.484654	0.21582	0.0247274
ENSGALG00000037414	DNAJC28	1	604.563	-0.492241	0.18508	0.00782284
ENSGALG00000033199		1	56.8929	0.475585	0.392556	0.225701
ENSGALG00000014031	ETFRF1	1	668.041	-0.190893	0.159776	0.232184
ENSGALG00000011327	NR2C1	1	897.314	0.0479573	0.186722	0.797304
ENSGALG00000016921	UCHL3	1	2772.14	-0.221575	0.214429	0.30145
ENSGALG00000030943	KRAS	1	836.501	-0.475535	0.176503	0.00705572
ENSGALG00000016922	COMMD6	1	838.862	0.119314	0.157763	0.449475
ENSGALG00000037076	GART	1	3129.07	0.00578337	0.162624	0.971631
ENSGALG00000054273	RASSF8	1	2312.88	0.00998234	0.163099	0.951197
ENSGALG00000048539	BHLHE41	1	130.371	-0.703333	0.334571	0.0355362
ENSGALG00000014042	SSPN	1	7189.14	-1.0194	0.180001	1.48469e-08
ENSGALG00000016925	TBC1D4	1	1441.6	-0.902899	0.213936	2.43858e-05
ENSGALG00000014071	ITPR2	1	2037.05	0.0886535	0.211262	0.674749
ENSGALG00000011342	FGD6	1	2548.02	-0.825571	0.371487	0.0262604
ENSGALG00000016926	KLF12	1	771.241	-0.0895411	0.224663	0.690219
ENSGALG00000011357	VEZT	1	1590.87	-0.286239	0.248875	0.25009
ENSGALG00000048502		1	0	NA	NA	NA
ENSGALG00000047534		1	70.4393	-1.38088	0.399595	0.000548855
ENSGALG00000014083	INTS13	1	8709.46	-0.512951	0.191239	0.00731283
ENSGALG00000052354		1	12280.2	-0.0135694	0.306583	0.964697
ENSGALG00000014084	FGFR1OP2	1	1310.62	-0.568265	0.212014	0.00735507
ENSGALG00000016927	KLF5	1	286.37	-0.0155356	0.380367	0.967421
ENSGALG00000011377	METAP2	1	8446.45	-0.354261	0.300875	0.239021
ENSGALG00000038649	DONSON	1	514.931	0.0374495	0.160468	0.815469
ENSGALG00000016929	PIBF1	1	654.743	0.0513595	0.190493	0.787457
ENSGALG00000014085	TM7SF3	1	404.844	-0.0196111	0.241757	0.935348
ENSGALG00000028788	5S_rRNA	1	1.16268	0.601221	2.2572	0.789964
ENSGALG00000011400	USP44	1	931.538	0.193418	0.164829	0.240617
ENSGALG00000011406	NTN4	1	184.016	0.907925	0.278641	0.00112041
ENSGALG00000016930	DIS3	1	2224.28	-0.274595	0.182175	0.131731
ENSGALG00000011409	SNRPF	1	2681.32	-0.168527	0.197611	0.393756
ENSGALG00000011414	AMDHD1	1	70.1861	0.876784	0.321462	0.00638179
ENSGALG00000029670	CRYZL1	1	1712.69	0.0194918	0.184806	0.916002
ENSGALG00000011421	HAL	1	29.053	0.868676	0.439808	0.0482539
ENSGALG00000016931	BORA	1	1100.66	-0.389545	0.209777	0.0633189
ENSGALG00000027435	MED21	1	1091.89	0.118459	0.205839	0.564959
ENSGALG00000014094	STK38L	1	1258.87	-0.367375	0.163582	0.0247157
ENSGALG00000033709	LTA4H	1	3700.27	0.110714	0.186826	0.553446
ENSGALG00000054818		1	10.626	0.618256	0.717396	0.388794
ENSGALG00000014096	ARNTL2	1	1743.32	0.203006	0.145044	0.161626
ENSGALG00000053455		1	6.13602	-1.22246	1.18324	0.301534
ENSGALG00000043701	ELK3	1	3188.6	0.87903	0.154388	1.24364e-08
ENSGALG00000045540		1	590.027	-0.0152211	0.217679	0.944254
ENSGALG00000051297		1	954.307	0.0851047	0.185095	0.645668
ENSGALG00000016932	MZT1	1	1203.85	0.0679359	0.207328	0.743159
ENSGALG00000011456	CDK17	1	1663.7	-0.201043	0.1855	0.278459
ENSGALG00000042023		1	1602.54	-0.0205908	0.194387	0.91564
ENSGALG00000047594	U2	1	0	NA	NA	NA
ENSGALG00000049206	U2	1	0	NA	NA	NA
ENSGALG00000037015	DACH1	1	484.473	-0.36774	0.253274	0.146516
ENSGALG00000029624	DHRS4	1	2028.55	0.12063	0.187576	0.52016
ENSGALG00000036677	ITSN1	1	5197.75	0.19754	0.15553	0.204045
ENSGALG00000025547	gga-mir-1743	1	0.436516	-0.957017	3.31458	0.772789
ENSGALG00000055070		1	0	NA	NA	NA
ENSGALG00000050128		1	0	NA	NA	NA
ENSGALG00000038527	CARMIL3	1	322.725	0.138055	0.218109	0.526758
ENSGALG00000016907	KLHL1	1	16.2061	1.26376	0.746391	0.0904248
ENSGALG00000014106	PPFIBP1	1	9046.97	-0.197639	0.225922	0.381676
ENSGALG00000048330		1	0.403029	2.08224	4.00978	0.603559
ENSGALG00000046962		1	0	NA	NA	NA
ENSGALG00000016908		1	39.3939	1.9187	0.427554	7.20203e-06
ENSGALG00000042611		1	694.033	-0.225639	0.212037	0.287261
ENSGALG00000051651		1	0.26714	0.789056	4.07366	0.846413
ENSGALG00000025709	SNORD63	1	0	NA	NA	NA
ENSGALG00000048560		1	4.92991	0.0710555	1.17343	0.951715
ENSGALG00000030056		1	4.64103	1.1027	1.04653	0.292034
ENSGALG00000051781		1	0.19986	-0.178853	4.0654	0.964909
ENSGALG00000052244		1	0.0991028	-1.11334	4.06938	0.784401
ENSGALG00000049642		1	0	NA	NA	NA
ENSGALG00000011459		1	40.3826	-0.0267656	0.418528	0.949009
ENSGALG00000050315	CLC2DL3	1	1207.3	-0.155167	0.178211	0.38392
ENSGALG00000052974		1	1.26263	-0.615117	1.81479	0.734649
ENSGALG00000044238		1	10.8006	-0.741993	0.685853	0.279317
ENSGALG00000054029		1	0.271302	1.59979	4.03242	0.691565
ENSGALG00000047489		1	53.2111	-0.165399	0.521987	0.751346
ENSGALG00000040645	gga-mir-7445-2	1	0	NA	NA	NA
ENSGALG00000016934		1	253.271	-1.17798	0.266018	9.50324e-06
ENSGALG00000052022		1	0	NA	NA	NA
ENSGALG00000047329		1	0.135651	0.789056	4.07366	0.846413
ENSGALG00000030853		1	160.632	0.215858	0.342749	0.528835
ENSGALG00000049088		1	0	NA	NA	NA
ENSGALG00000048185		1	0.100757	0.710792	4.07651	0.86158
ENSGALG00000016936	TDRD3	1	2944.67	-0.0574159	0.180022	0.749773
ENSGALG00000041812		1	14924.4	-0.531909	0.207673	0.0104289
ENSGALG00000048857		1	8.55449	-0.157018	0.858304	0.854845
ENSGALG00000053510		1	158.942	-0.037225	0.224192	0.868125
ENSGALG00000027579	MRPS6	1	4042.35	0.355087	0.232018	0.125911
ENSGALG00000050833		1	0.533717	-0.351413	3.09174	0.909506
ENSGALG00000051677		1	11.4651	-0.139029	0.683857	0.8389
ENSGALG00000028382	gga-mir-3524a	1	0.135651	0.789056	4.07366	0.846413
ENSGALG00000030793	KCNE2	1	6.63971	2.01311	0.950805	0.034237
ENSGALG00000031626		1	9.34501	1.5196	0.735762	0.0388913
ENSGALG00000034083		1	436.036	-0.103348	0.225766	0.647119
ENSGALG00000016011		1	0	NA	NA	NA
ENSGALG00000016014	RCAN1	1	1823.48	0.191197	0.151793	0.207817
ENSGALG00000041494	GOLGB1	1	3383.05	0.440762	0.326814	0.177445
ENSGALG00000016020	CLIC6	1	11.0531	-0.194904	0.6848	0.77594
ENSGALG00000031699	NEDD1	1	3285.73	-0.410675	0.158589	0.00960976
ENSGALG00000016937	DIAPH3	1	1071.75	-0.52538	0.183243	0.00414221
ENSGALG00000016022	RUNX1	1	17.3885	0.344694	0.57179	0.546619
ENSGALG00000039682	HCLS1	1	115.661	1.12177	0.345066	0.00115047
ENSGALG00000025410	gga-mir-1691	1	0	NA	NA	NA
ENSGALG00000025889		1	0.0991028	-1.11334	4.06938	0.784401
ENSGALG00000026407		1	0	NA	NA	NA
ENSGALG00000038044	NME6	1	224.356	-0.168021	0.231363	0.467702
ENSGALG00000049981		1	0.100757	0.710792	4.07651	0.86158
ENSGALG00000029125		1	0.503787	2.39373	3.99026	0.548577
ENSGALG00000026453		1	0.806069	1.52341	2.40646	0.5267
ENSGALG00000016024	SETD4	1	296.303	-0.165137	0.193471	0.393353
ENSGALG00000018238	gga-mir-135a-2	1	0	NA	NA	NA
ENSGALG00000032458	RABL2A	1	305.718	0.163619	0.235935	0.487999
ENSGALG00000011504	TMPO	1	8884.35	-0.292924	0.158602	0.0647606
ENSGALG00000016027	CBR3	1	2234.36	-0.0722563	0.179379	0.687086
ENSGALG00000014122	CYB5R1	1	6530.84	-0.25122	0.145699	0.0846635
ENSGALG00000047768		1	9.64268	-2.38344	0.820383	0.00366922
ENSGALG00000016036	DOP1B	1	1002.72	0.152761	0.275005	0.578562
ENSGALG00000035824	ARSA	1	802.223	-0.0165729	0.166253	0.920595
ENSGALG00000034366		1	0.391502	-0.401376	4.05844	0.921218
ENSGALG00000050523	gga-mir-12207	1	0.236408	1.46485	4.03931	0.716867
ENSGALG00000011514	SLC25A3	1	30900.7	-0.544732	0.180524	0.0025486
ENSGALG00000033919		1	1672.54	-0.0986483	0.301353	0.743402
ENSGALG00000014126		1	63.711	0.715159	0.630749	0.256868
ENSGALG00000035329	gga-mir-7452	1	0	NA	NA	NA
ENSGALG00000019262		1	9.17409	-0.342026	0.881678	0.698071
ENSGALG00000024964	SNORA53	1	22.5839	0.133952	0.532094	0.801238
ENSGALG00000014128	A4GALT	1	955.144	-0.597727	0.310074	0.0538937
ENSGALG00000036556	MORC4	1	2564.67	-0.081034	0.172852	0.639209
ENSGALG00000026284	IKBIP	1	670.597	-0.204084	0.184992	0.269939
ENSGALG00000014140	ARFGAP3	1	3350.18	0.0831367	0.157738	0.598155
ENSGALG00000011531	APAF1	1	954.373	-0.257922	0.182013	0.156467
ENSGALG00000034440	gga-mir-6708	1	0	NA	NA	NA
ENSGALG00000038707	gga-mir-1604	1	0.406953	2.06335	4.0111	0.606966
ENSGALG00000051055	MAPK8IP2	1	181.707	0.0797529	0.267494	0.76559
ENSGALG00000052929		1	35.3817	-0.148388	0.404526	0.713753
ENSGALG00000054904		1	78.8778	-0.456226	0.339122	0.178524
ENSGALG00000011549	ANKS1B	1	264.206	0.691311	0.216461	0.00140461
ENSGALG00000016042	CHAF1B	1	2161.02	-0.404256	0.201354	0.0446761
ENSGALG00000053146		1	0	NA	NA	NA
ENSGALG00000050267	CALU	1	2194.16	0.0293319	0.202509	0.884836
ENSGALG00000048059		1	156.993	-1.08606	0.481778	0.0241792
ENSGALG00000053846		1	1407.29	-0.784785	0.375293	0.036517
ENSGALG00000054163		1	140.571	-1.23254	0.605037	0.0416363
ENSGALG00000047166		1	334.578	0.126073	0.19459	0.517057
ENSGALG00000048258		1	9.56129	0.28825	1.04328	0.782324
ENSGALG00000055132		1	0	NA	NA	NA
ENSGALG00000011557	UHRF1BP1L	1	1330.46	-0.0910051	0.201116	0.650908
ENSGALG00000054512		1	677.657	0.309994	0.263618	0.239626
ENSGALG00000051789		1	16.32	-0.110931	0.623963	0.858892
ENSGALG00000040976	ACTR6	1	3502.68	-0.258825	0.220486	0.240442
ENSGALG00000016941	PCDH17	1	235.094	0.532251	0.21088	0.0116045
ENSGALG00000016043	CLDN14	1	0.890573	-2.27862	2.32691	0.327458
ENSGALG00000016044	SIM2	1	20.1255	6.74811	1.49895	6.73545e-06
ENSGALG00000027756		1	0	NA	NA	NA
ENSGALG00000025658		1	0	NA	NA	NA
ENSGALG00000014159	PACSIN2	1	3433.47	-0.0697941	0.150671	0.643205
ENSGALG00000025399		1	0	NA	NA	NA
ENSGALG00000016943	OLFM4	1	44.9707	0.473973	0.448769	0.290894
ENSGALG00000054297		1	2217.59	0.215339	0.21872	0.32485
ENSGALG00000043476	ARF5	1	515.47	0.366088	0.250256	0.143506
ENSGALG00000016047	HLCS	1	781.856	0.00406191	0.169061	0.980832
ENSGALG00000011569	SCYL2	1	1920.75	-0.255716	0.19018	0.178753
ENSGALG00000033149	GCC1	1	818.93	0.0558406	0.185661	0.763593
ENSGALG00000036258	PCDH8	1	679.423	1.42866	0.255124	2.14523e-08
ENSGALG00000054080	RIPPLY3	1	8.62038	1.26189	0.993014	0.20381
ENSGALG00000043771	DENND6B	1	789.157	-0.114982	0.252996	0.649482
ENSGALG00000016945	LECT1	1	5200.51	2.09282	0.225093	1.43705e-20
ENSGALG00000029341	PPP6R2	1	1327.88	-0.366063	0.165809	0.027262
ENSGALG00000014163	TTLL1	1	130.976	-0.166797	0.245008	0.496011
ENSGALG00000041122	SLC17A8	1	17.3747	-2.01886	0.630227	0.00135824
ENSGALG00000035085	gga-mir-1651	1	0.201763	-1.33585	4.06242	0.742283
ENSGALG00000016946	SUGT1	1	3860.55	-0.187259	0.223435	0.401981
ENSGALG00000016050	TTC3	1	3056.29	-0.0104976	0.214363	0.960943
ENSGALG00000043178	SBF1	1	4461.91	-0.200534	0.196038	0.306339
ENSGALG00000014164	BIK	1	58.844	0.149882	0.405639	0.711758
ENSGALG00000011594	NR1H4	1	1.4733	1.1897	2.3097	0.606492
ENSGALG00000034275	MCAT	1	715.503	-0.62763	0.207711	0.00251402
ENSGALG00000028373	GAS2L3	1	624.348	-0.515382	0.223506	0.0211163
ENSGALG00000014166	TSPO	1	699.159	0.276891	0.209304	0.185865
ENSGALG00000016947	ELF1	1	1308.28	0.179394	0.154589	0.245862
ENSGALG00000052442		1	0	NA	NA	NA
ENSGALG00000041965	MIOX	1	3.75865	-0.146719	1.46831	0.920405
ENSGALG00000016949	WBP4	1	3042.39	-0.144433	0.295086	0.624516
ENSGALG00000014167	TTLL12	1	3872.9	-0.117993	0.177118	0.505297
ENSGALG00000016052	VPS26C	1	2033.59	0.0270063	0.152921	0.859821
ENSGALG00000041528	LMF2	1	4826.97	-0.109756	0.176452	0.533931
ENSGALG00000011614	ANO4	1	22.1688	2.70768	0.691512	9.01805e-05
ENSGALG00000054793	NCAPH2	1	1800.67	-0.295012	0.160307	0.0657253
ENSGALG00000046885	SCO2	1	682.877	-0.125897	0.290204	0.664418
ENSGALG00000016053	DYRK1A	1	1185.2	-0.24181	0.19386	0.21227
ENSGALG00000039982	IRF5	1	95.2303	-0.123775	0.369142	0.737395
ENSGALG00000016951	MTRF1	1	1628.6	-0.094275	0.157976	0.550661
ENSGALG00000014178	SCUBE1	1	108.116	1.24705	0.322466	0.000110082
ENSGALG00000039420	TNPO3	1	1695.82	-0.190115	0.176161	0.280493
ENSGALG00000036114	SMO	1	4675.2	-0.0333535	0.162147	0.837026
ENSGALG00000016054	KCNJ6	1	16.8427	0.0275494	0.55685	0.960542
ENSGALG00000040808		1	440.383	-0.473626	0.194392	0.0148324
ENSGALG00000032868	AHCYL2	1	1527.36	-0.164739	0.168558	0.328399
ENSGALG00000011633	SLC5A8	1	43.2573	4.27289	0.752549	1.36369e-08
ENSGALG00000028323		1	0	NA	NA	NA
ENSGALG00000016055	KCNJ15	1	24.7368	0.761161	0.462932	0.100131
ENSGALG00000011643	UTP20	1	2750.01	-0.171885	0.211459	0.416302
ENSGALG00000014186	MPPED1	1	901.98	0.423844	0.180246	0.0186994
ENSGALG00000032808		1	1387.38	-0.484125	0.200774	0.015896
ENSGALG00000016058	ERG	1	661.272	1.11213	0.184538	1.67491e-09
ENSGALG00000016954	RGCC	1	18.5324	-0.204027	0.639515	0.749701
ENSGALG00000038520	STRIP2	1	1200.14	-0.742704	0.207253	0.000338945
ENSGALG00000011651	ARL1	1	4497.11	-0.241582	0.184693	0.190866
ENSGALG00000016955	VWA8	1	2035.31	-0.707898	0.281936	0.0120442
ENSGALG00000047596	SMKR1	1	23.7526	0.62076	0.470504	0.187052
ENSGALG00000014188		1	1.30937	3.71309	2.21543	0.0937353
ENSGALG00000052391		1	3.51535	3.22528	1.5632	0.039088
ENSGALG00000040060	NRF1	1	388.751	-0.150455	0.20484	0.462643
ENSGALG00000014189	SULT4A1	1	488.405	0.465518	0.214323	0.0298525
ENSGALG00000016059	ETS2	1	1053.08	0.819128	0.210272	9.79708e-05
ENSGALG00000011662	NUP205	1	6099.41	0.0896894	0.179367	0.617052
ENSGALG00000017789	5S_rRNA	1	0.399968	-2.29404	3.96635	0.56301
ENSGALG00000029308	PNPLA3	1	1003.53	0.0736146	0.156297	0.637648
ENSGALG00000016959	DGKH	1	224.28	0.358877	0.576554	0.533645
ENSGALG00000016062	PSMG1	1	2245.97	-0.213009	0.21156	0.314007
ENSGALG00000014194	SAMM50	1	5403.55	-0.448731	0.208478	0.0313646
ENSGALG00000054860	gga-mir-182	1	0	NA	NA	NA
ENSGALG00000048065	gga-mir-96	1	0	NA	NA	NA
ENSGALG00000011682	CNOT4	1	1147.28	-0.100564	0.15718	0.522302
ENSGALG00000024492	gga-mir-183	1	0	NA	NA	NA
ENSGALG00000016065	BRWD1	1	2677.48	-0.0956599	0.195451	0.624536
ENSGALG00000031975	UBE2H	1	4531.94	-0.174503	0.204049	0.39244
ENSGALG00000022739	AKAP11	1	1346.34	-0.167962	0.275445	0.542005
ENSGALG00000026163	TNFSF11	1	4.68045	1.19364	1.04	0.251083
ENSGALG00000008003	ZC3HC1	1	971.377	-0.243276	0.240637	0.312034
ENSGALG00000027129	gga-mir-6676	1	0	NA	NA	NA
ENSGALG00000008013	KLHDC10	1	647.209	-0.190774	0.187494	0.30892
ENSGALG00000016964		1	30.3202	0.368408	0.539104	0.494373
ENSGALG00000016067	HMGN1	1	8972.26	-0.438849	0.236676	0.0637079
ENSGALG00000014201	PARVB	1	8168.73	0.24522	0.216557	0.257485
ENSGALG00000030571		1	12.1744	-0.560677	0.742218	0.450004
ENSGALG00000028816	gga-mir-6629	1	1.49887	-3.15289	2.24781	0.160721
ENSGALG00000036140		1	7.4504	-0.942195	0.998229	0.345238
ENSGALG00000016965	DNAJC15	1	1475.25	-0.393575	0.205412	0.0553617
ENSGALG00000011717		1	62.0939	0.164695	0.567886	0.771805
ENSGALG00000008036	TMEM209	1	935.597	0.0385307	0.173257	0.824009
ENSGALG00000016070	WRB	1	2061.35	0.174643	0.165594	0.291586
ENSGALG00000011722	STRA8	1	4.64924	1.46985	1.02608	0.152004
ENSGALG00000011724	WDR91	1	2933.55	-0.059829	0.166099	0.718698
ENSGALG00000008048	CPA2	1	0	NA	NA	NA
ENSGALG00000014203	PARVG	1	144.704	0.426584	0.269978	0.114091
ENSGALG00000016125	LCA5L	1	124.288	0.00773069	0.257239	0.976025
ENSGALG00000016967	ENOX1	1	1063.53	0.742532	0.181184	4.16345e-05
ENSGALG00000016127		1	5742.13	-0.699217	0.193967	0.000312356
ENSGALG00000044155	TMEM140	1	106.274	0.472691	0.305037	0.121234
ENSGALG00000016128	B3GALT5	1	134.054	-0.667127	0.351712	0.0578546
ENSGALG00000011727	AGBL3	1	2.44492	0.632358	1.46094	0.665128
ENSGALG00000016132	IGSF5	1	39.2151	-1.20273	0.382336	0.00165658
ENSGALG00000027296	CPA5	1	0.399968	-2.29404	3.96635	0.56301
ENSGALG00000048495	gga-mir-6555	1	0.60504	-0.713305	3.55403	0.840931
ENSGALG00000047890	PCP4	1	81.8309	0.835332	0.471497	0.0764511
ENSGALG00000025735	PDE6H	1	7.9729	-1.20991	1.01465	0.233089
ENSGALG00000016969		1	57.8344	1.53536	0.366818	2.84404e-05
ENSGALG00000016138	DSCAM	1	33.9089	1.85538	0.677208	0.00614871
ENSGALG00000011738	ARHGDIB	1	4059.26	0.300659	0.18688	0.107652
ENSGALG00000008087	CPA1	1	0.502628	-2.57622	3.68427	0.484397
ENSGALG00000011739	ERP27	1	3.57491	0.153383	1.32862	0.908093
ENSGALG00000034932	BACE2	1	462.135	-0.00608403	0.257203	0.981128
ENSGALG00000016140	FAM3B	1	120.469	-0.359586	0.259002	0.165029
ENSGALG00000011740	MGP	1	38.6614	1.56313	0.429131	0.000269964
ENSGALG00000051495		1	0	NA	NA	NA
ENSGALG00000036598	SHISAL1	1	6.10628	2.12809	1.21321	0.0794153
ENSGALG00000008103	CEP41	1	465.143	-0.195913	0.172562	0.25624
ENSGALG00000052311		1	0	NA	NA	NA
ENSGALG00000016968	CCDC122	1	37.4659	0.585699	0.385218	0.128402
ENSGALG00000028560	OC3	1	0	NA	NA	NA
ENSGALG00000014213	PRR5	1	453.893	0.699129	0.352725	0.0474703
ENSGALG00000051442	TSC22D1	1	2656.36	0.621555	0.222754	0.00526559
ENSGALG00000011742	ART4	1	13.6386	0.742264	0.722692	0.304382
ENSGALG00000008111	MEST	1	183.245	-0.0150989	0.253188	0.952446
ENSGALG00000016971		1	1149.64	-0.238581	0.279453	0.393247
ENSGALG00000011743	SMCO3	1	1.00294	3.28527	2.96109	0.267223
ENSGALG00000016972	NUFIP1	1	1299.82	-0.238098	0.175425	0.174698
ENSGALG00000011745		1	4227.19	-0.151829	0.181868	0.403812
ENSGALG00000049268	H2A-VIII	1	0	NA	NA	NA
ENSGALG00000016142	MX1	1	196.178	-0.163939	0.234237	0.483997
ENSGALG00000050451		1	0	NA	NA	NA
ENSGALG00000011747		1	180.506	-0.490052	0.463422	0.2903
ENSGALG00000008144	COPG2	1	3984.73	-0.161304	0.192887	0.403008
ENSGALG00000050350	HIST1H2B7	1	7.7917	-0.321752	1.00252	0.748252
ENSGALG00000048231		1	0	NA	NA	NA
ENSGALG00000053680	HIST1H46L2	1	0	NA	NA	NA
ENSGALG00000031567	GPALPP1	1	1160.06	0.136814	0.191209	0.474289
ENSGALG00000031571	H2A-VIII	1	0	NA	NA	NA
ENSGALG00000048795		1	0	NA	NA	NA
ENSGALG00000049408	HIST1H2B8	1	17.9326	0.810203	0.592763	0.17168
ENSGALG00000008162	FBXO18	1	585.687	0.0120562	0.236041	0.959264
ENSGALG00000019261	ARHGAP8	1	223.321	-1.03888	0.280315	0.000210471
ENSGALG00000038969		1	1.73583	-1.83519	1.81569	0.312142
ENSGALG00000037322	HIST1H46	1	9.8193	0.918237	0.763879	0.229336
ENSGALG00000008168	ANKRD16	1	195.633	0.577388	0.239217	0.0157932
ENSGALG00000036908		1	3.98973	0.247618	1.04669	0.812989
ENSGALG00000025645	U6	1	0	NA	NA	NA
ENSGALG00000053262	HIST2H4B	1	0	NA	NA	NA
ENSGALG00000049859	H2AFJ	1	48.5512	0.716167	0.455811	0.116138
ENSGALG00000016974	GTF2F2	1	2392.33	-0.122166	0.239936	0.610638
ENSGALG00000049629		1	0	NA	NA	NA
ENSGALG00000049751		1	47.5285	0.88914	0.365676	0.0150367
ENSGALG00000014218	PHF21B	1	50.8359	-0.180994	0.357616	0.612777
ENSGALG00000008169	GDI1	1	9063.83	0.0105169	0.169548	0.95054
ENSGALG00000031159	HIST1H110	1	248.509	0.598205	0.235859	0.0112037
ENSGALG00000047126		1	10.0387	0.353285	0.687008	0.607086
ENSGALG00000035244		1	99.0051	0.054812	0.494365	0.911717
ENSGALG00000014222	NUP50	1	4763.06	-0.341617	0.179699	0.0572954
ENSGALG00000016975	KCTD4	1	37.6138	1.31	0.4962	0.00828899
ENSGALG00000051325		1	73.2934	0.484152	0.364019	0.183513
ENSGALG00000025639		1	43.4815	-0.190588	0.374949	0.61124
ENSGALG00000048097		1	44.375	0.981199	0.372135	0.00837228
ENSGALG00000028872	TPT1	1	53732.7	0.0771261	0.242666	0.750616
ENSGALG00000037167	HIST1H103	1	607.531	-0.190242	0.237408	0.422941
ENSGALG00000042491		1	8.27365	-0.463035	0.874466	0.596455
ENSGALG00000048451		1	2.21673	0.516385	1.64548	0.753658
ENSGALG00000017810		1	28.5599	-0.32208	0.464511	0.488075
ENSGALG00000055014		1	0	NA	NA	NA
ENSGALG00000016979	SLC25A30	1	535.395	-0.285864	0.232051	0.217987
ENSGALG00000046198		1	1.40731	0.257386	2.03835	0.899517
ENSGALG00000048212	H2A-VIII	1	0	NA	NA	NA
ENSGALG00000049248		1	0	NA	NA	NA
ENSGALG00000016980	COG3	1	754.594	-0.00382223	0.228066	0.986629
ENSGALG00000050250		1	0.436268	0.98159	3.26649	0.763793
ENSGALG00000055101	TASOR2	1	1141.71	-0.164474	0.306679	0.591747
ENSGALG00000031874	HIST1H101	1	1338.81	0.634288	0.170114	0.000192544
ENSGALG00000050157		1	125.634	0.0811407	0.271059	0.764675
ENSGALG00000054083	H2A-VIII	1	17.6466	0.556108	0.533574	0.297304
ENSGALG00000016981	SPERT	1	29.902	-5.79627	0.980596	3.40099e-09
ENSGALG00000052897		1	0	NA	NA	NA
ENSGALG00000014226	KIAA0930	1	1067.05	0.33893	0.181237	0.0614704
ENSGALG00000027571		1	144.547	1.07531	0.259591	3.43812e-05
ENSGALG00000026849	SIAH3	1	8.01692	1.29383	0.823734	0.116254
ENSGALG00000052030	H2A-VIII	1	0.290744	-1.33585	4.06242	0.742283
ENSGALG00000016984	ZC3H13	1	11408.7	-0.0149758	0.18691	0.93614
ENSGALG00000014227	UPK3A	1	43.064	-0.355524	0.440455	0.419566
ENSGALG00000008401	ASB13	1	321.771	-0.0155577	0.182059	0.9319
ENSGALG00000048312		1	0	NA	NA	NA
ENSGALG00000050309		1	9.99297	0.0861766	0.721036	0.904865
ENSGALG00000014228	SMC1B	1	16.0747	-0.0443579	0.648215	0.945443
ENSGALG00000032645	H2A-VIII	1	10.9508	0.455878	0.713234	0.522712
ENSGALG00000047886		1	0	NA	NA	NA
ENSGALG00000016985	CPB2	1	26.5738	6.22162	2.84578	NA
ENSGALG00000008424	CALML3	1	2.57465	0.474811	1.39764	0.734066
ENSGALG00000052649	HIST1H2B5	1	9.08347	1.43547	0.886647	0.10545
ENSGALG00000014232	RIBC2	1	63.082	0.232739	0.36503	0.523742
ENSGALG00000008437	NET1	1	3801.96	-0.01207	0.155267	0.938037
ENSGALG00000027064	HIST1H3H	1	5.7446	0.238414	0.99974	0.811512
ENSGALG00000046904		1	0	NA	NA	NA
ENSGALG00000014233	FBLN1	1	11015.2	-0.318834	0.159661	0.0458305
ENSGALG00000051251		1	0	NA	NA	NA
ENSGALG00000016986	LCP1	1	1031.76	0.408338	0.239609	0.0883471
ENSGALG00000052284	H2A-VIII	1	30.3129	0.294929	0.452779	0.514804
ENSGALG00000047026		1	604.055	0.0894742	0.190185	0.638027
ENSGALG00000047073		1	0	NA	NA	NA
ENSGALG00000008444	TUBAL3	1	5738.23	0.227714	0.192336	0.236439
ENSGALG00000011783	HIST1H111R	1	10.9324	-0.680011	0.728386	0.350517
ENSGALG00000053511	APOLD1	1	364.784	1.15182	0.313041	0.000233743
ENSGALG00000011794	DDX47	1	1746.56	-0.290248	0.217664	0.182379
ENSGALG00000032978		1	51.9793	2.03378	0.54241	0.000177166
ENSGALG00000018270	gga-mir-205b	1	0.135651	0.789056	4.07366	0.846413
ENSGALG00000047442		1	564.897	1.1152	0.46688	0.0169116
ENSGALG00000011796		1	11.6776	0.191192	0.664469	0.773549
ENSGALG00000014234	ATXN10	1	700.539	-0.2595	0.230749	0.260759
ENSGALG00000011798	HEBP1	1	1276.92	-0.637409	0.808057	0.430219
ENSGALG00000038187	SLC35B4	1	1189.87	0.0320805	0.15455	0.835562
ENSGALG00000011799		1	5.81572	1.10717	0.962257	0.249899
ENSGALG00000011800	FAM234B	1	848.381	-0.0516325	0.21505	0.810257
ENSGALG00000037842	LRGUK	1	45.7654	0.841709	0.450899	0.0619385
ENSGALG00000036255	WNT7B	1	1.43618	-0.372071	2.32962	0.873107
ENSGALG00000027940		1	0	NA	NA	NA
ENSGALG00000018240	gga-let-7a-3	1	0	NA	NA	NA
ENSGALG00000018241	gga-let-7b	1	5.86993	-0.419707	0.886113	0.63575
ENSGALG00000008477	EXOC4	1	2798.55	-0.051628	0.144714	0.721273
ENSGALG00000011802	GSG1	1	39.7881	-0.169736	0.383123	0.657742
ENSGALG00000041470	PPARA	1	360.046	-0.835534	0.254927	0.00104712
ENSGALG00000011803	EMP1	1	986.307	-0.2561	0.211029	0.224911
ENSGALG00000026121	gga-mir-6581	1	0	NA	NA	NA
ENSGALG00000011809	GRIN2B	1	96.2172	-0.228589	0.409283	0.576496
ENSGALG00000011814	ATF7IP	1	1479.2	0.0367272	0.175587	0.834317
ENSGALG00000028216	gga-mir-6659	1	0.403526	-2.26485	4.02736	0.573867
ENSGALG00000049508	gga-mir-12214	1	0	NA	NA	NA
ENSGALG00000047120		1	0.335511	0.576229	3.587	0.872374
ENSGALG00000006489	CHCHD3	1	7774.62	-0.406527	0.215411	0.059131
ENSGALG00000016988	RUBCNL	1	767.702	-0.600705	0.236749	0.0111708
ENSGALG00000028840	CDPF1	1	273.038	0.00911834	0.262206	0.972259
ENSGALG00000029583	PLBD1	1	1602.65	-0.0783849	0.159419	0.622938
ENSGALG00000051852		1	44.3303	-0.131577	0.409142	0.747761
ENSGALG00000048687		1	2085.81	-0.231376	0.416789	0.5788
ENSGALG00000006473	PLXNA4	1	396.541	0.237662	0.88994	0.789427
ENSGALG00000016144	TMPRSS2	1	31.3907	0.544097	0.626481	0.385122
ENSGALG00000040189	RIPK4	1	332.424	0.261812	0.253529	0.301758
ENSGALG00000011838	GUCY2C	1	8.8276	2.0687	0.909019	0.022861
ENSGALG00000047970		1	0	NA	NA	NA
ENSGALG00000027460	gga-mir-6621	1	0	NA	NA	NA
ENSGALG00000014551		1	1028.87	-0.229785	0.260926	0.378505
ENSGALG00000019178	PRDM15	1	826.89	-0.0553204	0.168902	0.743268
ENSGALG00000016990	LRCH1	1	856.326	-0.106338	0.20494	0.60385
ENSGALG00000006409	PODXL	1	10913.1	0.244497	0.165868	0.140468
ENSGALG00000011847	TTC26	1	1217.22	0.332147	0.161657	0.0399138
ENSGALG00000016148	C2CD2	1	1432.78	-0.145738	0.166618	0.381747
ENSGALG00000011854	UBN2	1	920.222	-0.120578	0.317342	0.703974
ENSGALG00000016991	ESD	1	5572.83	0.343181	0.181737	0.0589804
ENSGALG00000006356	MKLN1	1	2352.96	-0.290864	0.163134	0.0745894
ENSGALG00000050747		1	10.0371	-1.86739	1.1874	0.115795
ENSGALG00000011856	FMC1	1	558.304	-0.0891378	0.277955	0.748444
ENSGALG00000016147	ZBTB21	1	411.949	-0.0334669	0.173058	0.846657
ENSGALG00000048362		1	10.6457	-0.976345	0.680231	0.151198
ENSGALG00000036238	LUC7L2	1	5388.94	-0.0604837	0.173635	0.727586
ENSGALG00000013911	ZC3HAV1	1	460.313	-0.242517	0.181717	0.182012
ENSGALG00000052523		1	0.740205	1.30908	2.85726	0.646837
ENSGALG00000011859	GBE	1	4.44619	-1.87256	1.19154	0.116056
ENSGALG00000052368		1	0.93534	-0.791191	2.23894	0.723805
ENSGALG00000012921	ETV6	1	1221.73	0.278381	0.162249	0.0862041
ENSGALG00000018236	gga-mir-29b-1	1	0.135651	0.789056	4.07366	0.846413
ENSGALG00000028016		1	56.5805	-0.218603	0.406446	0.590687
ENSGALG00000018235	gga-mir-29a	1	0	NA	NA	NA
ENSGALG00000016992	HTR2A	1	404.256	0.291032	0.366193	0.426759
ENSGALG00000017894	U12	1	1.00735	1.8798	2.61592	0.472388
ENSGALG00000041978	K123	1	9.05078	-0.379331	0.917053	0.679137
ENSGALG00000011863	POLDIP3	1	3652.86	-0.0645218	0.192312	0.737244
ENSGALG00000016993	SUCLA2	1	7630.82	-0.797216	0.202633	8.34445e-05
ENSGALG00000026856	gga-mir-1727	1	1.61299	0.687036	1.68525	0.683512
ENSGALG00000011544	BCL2L14	1	21.5159	1.86669	0.661387	0.00476678
ENSGALG00000042471	IL2RA	1	0.701754	0.823811	2.53041	0.744755
ENSGALG00000011866	RRP7A	1	1304.51	-0.297424	0.230988	0.19788
ENSGALG00000016157		1	8.98213	2.89538	0.899284	0.00128348
ENSGALG00000011867	SERHL	1	876.51	0.00311453	0.169292	0.985322
ENSGALG00000006332	RBM17	1	3752.3	-0.188371	0.183226	0.303914
ENSGALG00000031503	LRP6	1	844.425	0.0511536	0.360658	0.887211
ENSGALG00000016994	NUDT15	1	434.645	0.0609015	0.219006	0.78095
ENSGALG00000023193	SOCS1L	1	490.686	0.210148	0.211424	0.320239
ENSGALG00000011872		1	109.156	-0.0662208	0.266791	0.80397
ENSGALG00000048672		1	0.135651	0.789056	4.07366	0.846413
ENSGALG00000025388	gga-mir-1581	1	7.28133	-0.199422	0.88691	0.822095
ENSGALG00000016164	ABCG1	1	237.665	-0.961959	0.247319	0.000100432
ENSGALG00000040369	PFKFB3	1	78.7815	-0.0913216	0.290015	0.752848
ENSGALG00000011878	TCF20	1	3087.33	-0.0151039	0.22529	0.946548
ENSGALG00000011894	CYP2D6	1	1274.1	0.0981379	0.179578	0.584727
ENSGALG00000016165	TFF2	1	0.391502	-0.401376	4.05844	0.921218
ENSGALG00000016169	TMPRSS3	1	0.871932	1.68478	2.69502	0.531877
ENSGALG00000035223	NDUFA6	1	2692.29	-0.436964	0.207937	0.0356038
ENSGALG00000016173	UBASH3A	1	1.03168	-2.35839	2.62782	0.369468
ENSGALG00000011897	SMDT1	1	2465.23	-0.0537169	0.217494	0.804923
ENSGALG00000011898	PHETA2	1	1392.78	-0.316328	0.241432	0.190122
ENSGALG00000047528	gga-mir-12212	1	0.198206	-1.63185	4.05445	0.687328
ENSGALG00000038710	MANSC1	1	504.595	0.597119	0.212378	0.00492971
ENSGALG00000011900	NAGA	1	811.796	-0.223937	0.18423	0.224164
ENSGALG00000034970		1	295.71	0.253794	0.276517	0.358711
ENSGALG00000040393	BORCS5	1	1028.97	0.00533115	0.198775	0.978603
ENSGALG00000043976	RSPH1	1	6.87562	-0.140203	0.868158	0.871704
ENSGALG00000028155	DUSP16	1	551.798	-0.0875531	0.23775	0.712682
ENSGALG00000048616		1	0	NA	NA	NA
ENSGALG00000016185	SLC37A1	1	997.737	-0.925274	0.220091	2.62181e-05
ENSGALG00000037030	CREBL2	1	800.695	0.248388	0.173904	0.153206
ENSGALG00000011908	WBP2NL	1	2670.25	-0.149237	0.139246	0.283834
ENSGALG00000045619	GPR19	1	0.300866	-1.96344	4.04236	0.627168
ENSGALG00000009279	SFMBT2	1	244.619	-0.0983934	0.390231	0.800932
ENSGALG00000026896		1	772.403	0.276543	0.192521	0.150881
ENSGALG00000016186	PDE9A	1	210.198	-1.30921	0.2246	5.57319e-09
ENSGALG00000016995	MED4	1	1242.41	-0.129508	0.21557	0.547995
ENSGALG00000029446		1	19.9447	1.27147	0.563748	0.0241091
ENSGALG00000016996	ITM2B	1	11841.1	0.0228855	0.150679	0.879279
ENSGALG00000022980	CDKN1B	1	3801.45	0.493917	0.196752	0.0120612
ENSGALG00000016187	WDR4	1	1869.22	-0.279475	0.206913	0.176796
ENSGALG00000036730	MRPS35	1	2131.48	-0.513724	0.205316	0.0123454
ENSGALG00000011913	SEPTIN3	1	1.88755	0.578143	1.6184	0.720918
ENSGALG00000022813	NDUFV3	1	2755.54	-0.306663	0.218637	0.160732
ENSGALG00000026372	MANSC4	1	24.7936	1.7548	0.798726	0.0280202
ENSGALG00000006891	ITIH5	1	244.229	1.37867	0.417575	0.000961294
ENSGALG00000049127		1	2.84367	-1.2499	1.34204	0.351676
ENSGALG00000017296	KLHL42	1	263.97	-0.568069	0.237066	0.0165637
ENSGALG00000011914	CENPM	1	811.061	-0.420326	0.222481	0.0588563
ENSGALG00000019322	TNFRSF13C	1	0	NA	NA	NA
ENSGALG00000006833	ITIH2	1	88.4874	3.24087	1.302	0.0128051
ENSGALG00000017295	PTHLH	1	19.0195	0.00720493	0.578268	0.990059
ENSGALG00000016191	PKNOX1	1	858.068	-0.286181	0.19218	0.136453
ENSGALG00000045762		1	26.9084	0.450936	0.45391	0.320492
ENSGALG00000016997	RB1	1	2685.47	-0.318432	0.191763	0.096803
ENSGALG00000041687	SREBF2	1	2846.37	-0.218901	0.136172	0.107937
ENSGALG00000018239	gga-mir-33-1	1	0	NA	NA	NA
ENSGALG00000011918	CCDC134	1	462.3	-0.696602	0.225369	0.00199525
ENSGALG00000030702	KIN	1	848.763	-0.122404	0.219904	0.577783
ENSGALG00000031186		1	72.4563	-0.616209	0.389837	0.11395
ENSGALG00000050576		1	53.766	-0.490875	0.439566	0.264111
ENSGALG00000031666	CCDC91	1	515.114	0.177608	0.208367	0.394003
ENSGALG00000019175		1	13.1318	-2.46731	0.75579	0.00109639
ENSGALG00000011931	SNU13	1	5511.92	-0.365118	0.239221	0.126941
ENSGALG00000016196		1	753.75	-0.300914	0.381981	0.43083
ENSGALG00000011932	XRCC6	1	1511.28	-0.215484	0.194606	0.268173
ENSGALG00000006753	ATP5C1	1	15631.4	-0.580048	0.191977	0.00251572
ENSGALG00000047248	DESI1	1	5133.6	-0.389722	0.16549	0.0185245
ENSGALG00000051865		1	0.807051	-3.24392	3.86133	0.40085
ENSGALG00000038599	PMM1	1	536.452	-0.49441	0.188534	0.00873159
ENSGALG00000030101	CSDC2	1	44.7704	0.749742	0.405463	0.064443
ENSGALG00000017291	FAR2	1	928.457	-0.279268	0.156958	0.0751981
ENSGALG00000011947	POLR3H	1	864.924	-0.132947	0.200203	0.506652
ENSGALG00000006731	TAF3	1	2788.14	-0.0988022	0.187116	0.597481
ENSGALG00000016198	U2AF1	1	6537.08	-0.00687707	0.230588	0.976207
ENSGALG00000029270	GATA3	1	79.861	0.450031	0.286418	0.116128
ENSGALG00000011950	ACO2	1	25402.9	-0.904674	0.162934	2.81795e-08
ENSGALG00000050900		1	0	NA	NA	NA
ENSGALG00000017290		1	1720.42	0.0140464	0.175716	0.936286
ENSGALG00000011953	PHF5A	1	2359.95	-0.271383	0.242596	0.263286
ENSGALG00000017289	C12orf4	1	1253.43	-0.116281	0.210395	0.580482
ENSGALG00000011957	TOB2	1	1602.91	-0.0372003	0.235715	0.874599
ENSGALG00000016199	CRYAA	1	2.16885	0.281214	1.49195	0.850495
ENSGALG00000017287	FGF6	1	0.672677	1.69964	2.80839	0.545045
ENSGALG00000011958	TEF	1	986.307	0.0230609	0.186875	0.901788
ENSGALG00000027791	FGF23	1	11.3423	0.248601	0.83179	0.765036
ENSGALG00000034590	CELF2	1	1341.06	-0.112307	0.195889	0.56643
ENSGALG00000016998	LPAR6	1	156.563	1.46867	0.233595	3.23184e-10
ENSGALG00000041988	SIK1	1	11147.4	-0.28659	0.294931	0.331191
ENSGALG00000026776		1	1245.06	-0.566279	0.215418	0.00857002
ENSGALG00000011965	ZC3H7B	1	3722.98	-0.326144	0.219185	0.136755
ENSGALG00000017000	RCBTB2	1	738.54	-0.0460063	0.230467	0.841776
ENSGALG00000017283	CCND2	1	2341.47	0.260151	0.15491	0.0930795
ENSGALG00000011966	RANGAP1	1	3948.79	-0.53358	0.183189	0.00358294
ENSGALG00000016202	HSF2BP	1	529.853	0.68589	0.16573	3.49421e-05
ENSGALG00000017282	NDUFA9	1	6785.45	-0.507644	0.17282	0.00330964
ENSGALG00000011970	CHADL	1	33.2476	0.538837	0.535576	0.314373
ENSGALG00000035696	RRP1B	1	3612.62	-0.0933021	0.167198	0.576821
ENSGALG00000050065	CYSLTR2	1	15.506	0.691559	0.626411	0.269592
ENSGALG00000016205	PDXK	1	650.921	-0.371739	0.20424	0.068742
ENSGALG00000011976	L3MBTL2	1	1046.81	0.109667	0.164933	0.506105
ENSGALG00000017002	FNDC3A	1	3156.46	-0.0681646	0.143952	0.635839
ENSGALG00000040681		1	79.7069	-0.217511	0.296151	0.462668
ENSGALG00000031932	AGPAT3	1	1358.04	0.2918	0.160686	0.0693757
ENSGALG00000053475		1	0.805018	0.564213	2.7104	0.835099
ENSGALG00000049435		1	3.23437	-0.161602	1.28686	0.900065
ENSGALG00000051678		1	127.465	0.207362	0.478148	0.664522
ENSGALG00000022804		1	1683.66	-0.102141	0.188312	0.58754
ENSGALG00000052262	KCNA5	1	197.64	0.232645	0.210697	0.26952
ENSGALG00000045726		1	1566.94	-0.267171	0.208417	0.199876
ENSGALG00000046707		1	5.88346	0.0100523	0.953988	0.991593
ENSGALG00000049772		1	5.90359	-1.38893	0.988536	0.16001
ENSGALG00000050991		1	1.18978	-3.82664	2.30555	0.0969645
ENSGALG00000053526	NTF3	1	459.9	1.66167	0.2459	1.4038e-11
ENSGALG00000017271	ANO2	1	7.24385	1.35355	0.851981	0.112125
ENSGALG00000019171	GATD3A	1	7503.27	-0.595161	0.191237	0.00185718
ENSGALG00000053338		1	0.201763	-1.33585	4.06242	0.742283
ENSGALG00000048984		1	0.337166	1.85913	4.02074	0.643806
ENSGALG00000046714		1	64.4252	0.0927125	0.396958	0.815328
ENSGALG00000011992	EP300	1	3094.09	0.123806	0.393144	0.752827
ENSGALG00000052076		1	8.28007	-0.334861	0.908422	0.712412
ENSGALG00000045925		1	41.0934	1.3056	0.408788	0.00140397
ENSGALG00000031637	ICOSLG	1	688.155	0.75158	0.158786	2.20905e-06
ENSGALG00000011993	RBX1	1	1960.25	0.231962	0.234087	0.321723
ENSGALG00000025224	gga-mir-1683	1	35.522	-0.47368	0.396972	0.232777
ENSGALG00000012003	XPNPEP3	1	1534.46	-0.329415	0.165402	0.0464143
ENSGALG00000026773	gga-mir-222a	1	0	NA	NA	NA
ENSGALG00000017272	VWF	1	2305.87	3.71202	0.387237	9.16415e-22
ENSGALG00000018247	gga-mir-221	1	1.66235	-0.464871	1.64922	0.77804
ENSGALG00000017003	MLNR	1	38.8722	-0.0193256	0.445325	0.965385
ENSGALG00000012007	ST13P5	1	8363.3	-0.0483135	0.180966	0.789488
ENSGALG00000016215	DIPK2B	1	1002.46	0.954543	0.213578	7.8479e-06
ENSGALG00000017004	CDADC1	1	179.689	0.0116359	0.217222	0.95728
ENSGALG00000012013	SLC25A17	1	1345.16	0.0834391	0.238526	0.72648
ENSGALG00000017005	CAB39L	1	1585.97	-0.017312	0.15859	0.913074
ENSGALG00000016217		1	2734.51	0.161778	0.260066	0.533898
ENSGALG00000025441	gga-mir-1626	1	0.406953	2.06335	4.0111	0.606966
ENSGALG00000012024	MRTFA	1	1890.35	0.458857	0.201815	0.0229872
ENSGALG00000025473	gga-mir-1596	1	0.201763	-1.33585	4.06242	0.742283
ENSGALG00000049014		1	97.7909	0.0530195	0.322101	0.869255
ENSGALG00000012033	SGSM3	1	255.722	-0.029676	0.219605	0.892506
ENSGALG00000035563	USP6NL	1	1381.64	0.107587	0.183364	0.557377
ENSGALG00000048819		1	0.201763	-1.33585	4.06242	0.742283
ENSGALG00000006690	ECHDC3	1	1226.23	-0.637726	0.175179	0.000272197
ENSGALG00000028187	FUNDC1	1	2442.21	-0.000184938	0.196993	0.999251
ENSGALG00000012034	ADSL	1	5339.51	-0.444732	0.222348	0.0454831
ENSGALG00000055058		1	299.896	0.222172	0.244291	0.363109
ENSGALG00000017006	SETDB2	1	1045.02	-0.515774	0.179137	0.0039867
ENSGALG00000016221	EFHC2	1	63.6047	0.0595249	0.304256	0.844891
ENSGALG00000033772	UPF2	1	3181.62	-0.196689	0.163906	0.230136
ENSGALG00000019094	PHF11	1	665.504	-0.0300569	0.163946	0.854536
ENSGALG00000003674	DHTKD1	1	1818.13	-0.796652	0.169142	2.47763e-06
ENSGALG00000017897	U6	1	0	NA	NA	NA
ENSGALG00000036300	SEC61A2	1	2410.97	-0.396474	0.152083	0.00913523
ENSGALG00000016222	NDP	1	41.9424	0.618746	0.431675	0.151755
ENSGALG00000012050	TNRC6B	1	1523.16	-0.472368	0.443236	0.286547
ENSGALG00000017008	RCBTB1	1	3041.87	-0.193397	0.17751	0.275935
ENSGALG00000045936	FAM83F	1	0.938162	1.41169	2.25338	0.531001
ENSGALG00000013967	NUDT5	1	345.117	0.547945	0.339541	0.106575
ENSGALG00000012056	GRAP2	1	1.50757	2.20586	1.94036	0.255608
ENSGALG00000032836		1	301.748	0.405291	0.231309	0.0797456
ENSGALG00000014038	CDC123	1	1033.84	-0.13321	0.20174	0.509058
ENSGALG00000016224	MAOA	1	2306.13	-1.71216	0.212682	8.25769e-16
ENSGALG00000017274	CD9	1	491.073	1.78031	0.203424	2.10133e-18
ENSGALG00000035051		1	8.67275	0.896779	0.782772	0.251942
ENSGALG00000033051	CAMK1D	1	2768.4	-0.619249	0.315468	0.0496511
ENSGALG00000022733	ARL11	1	115.93	-0.801315	0.26605	0.00259627
ENSGALG00000017009	KPNA3	1	3432.93	0.153036	0.147535	0.299603
ENSGALG00000043916		1	2.35533	1.29162	1.75262	0.461142
ENSGALG00000054232	gga-mir-12209	1	0	NA	NA	NA
ENSGALG00000024676	7SK	1	0	NA	NA	NA
ENSGALG00000029810	RPS19BP1	1	1398.12	-0.00345347	0.203753	0.986477
ENSGALG00000017010	SPRYD7	1	1381.92	-0.238095	0.209363	0.255441
ENSGALG00000017276		1	61.8555	0.990776	0.396385	0.0124357
ENSGALG00000012135	ATF4	1	13905.7	-0.270238	0.247278	0.274459
ENSGALG00000013272	PRMT8	1	735.87	0.662894	0.190506	0.000502079
ENSGALG00000030140	CCDC3	1	54.5346	3.47549	0.616616	1.73646e-08
ENSGALG00000012144	MIEF1	1	657.013	-0.487102	0.223949	0.0296259
ENSGALG00000054994		1	14.1522	0.715614	0.773951	0.355162
ENSGALG00000042400	CASK	1	3348.18	0.00526462	0.183644	0.97713
ENSGALG00000013738	OPTN	1	2534.73	-0.192624	0.177257	0.277173
ENSGALG00000028989		1	62.5683	-0.364053	0.354669	0.304676
ENSGALG00000017011	TRIM13	1	781.209	0.0541842	0.229535	0.813385
ENSGALG00000036743	MGAT3	1	1675.45	-0.887654	0.282022	0.00164692
ENSGALG00000047524		1	0	NA	NA	NA
ENSGALG00000014347		1	354.184	-0.00429298	0.211167	0.98378
ENSGALG00000017012	KCNRG	1	74.0541	-0.569739	0.318784	0.0739011
ENSGALG00000018254	gga-mir-16-1	1	0	NA	NA	NA
ENSGALG00000018255	gga-mir-15a	1	0.201763	-1.33585	4.06242	0.742283
ENSGALG00000012150	TAB1	1	1052.85	-0.554692	0.213782	0.0094684
ENSGALG00000028232		1	1.20487	-1.40396	2.35988	0.551891
ENSGALG00000014346	TSPAN9	1	1318.89	0.110988	0.170791	0.515792
ENSGALG00000017015	RNASEH2B	1	3493.01	-0.229328	0.220644	0.298639
ENSGALG00000027665	SYNGR1	1	641.647	-0.322734	0.19694	0.101267
ENSGALG00000051073		1	0.201763	-1.33585	4.06242	0.742283
ENSGALG00000052513		1	1.37922	-1.88241	2.426	0.437791
ENSGALG00000044763	GPR82	1	15.1012	-1.26246	0.851226	0.138045
ENSGALG00000017016	FAM124A	1	361.565	0.323226	0.331901	0.330125
ENSGALG00000016227	GPR34	1	168.968	0.881255	0.274737	0.00133831
ENSGALG00000012172	RPL3	1	23148.3	0.0864948	0.208896	0.678833
ENSGALG00000017017	SERPINE3	1	7.12666	-0.0877491	0.882841	0.920826
ENSGALG00000016228	NYX	1	4.29383	-0.601527	1.11769	0.590446
ENSGALG00000017018	INTS6	1	1773.96	0.240787	0.235831	0.307247
ENSGALG00000016231	DDX3X	1	33606.9	0.0445995	0.162979	0.784353
ENSGALG00000014342	TEAD4	1	2519.67	-0.371502	0.152902	0.0151129
ENSGALG00000034198	MCM10	1	834.73	-0.194281	0.185236	0.294255
ENSGALG00000053773		1	9.48604	0.01262	0.819246	0.98771
ENSGALG00000017019	WDFY2	1	586.522	0.200108	0.164799	0.224653
ENSGALG00000048520		1	18.105	0.303764	0.505903	0.548213
ENSGALG00000017808	SNORD83A	1	0.864566	-0.174662	2.42805	0.942654
ENSGALG00000036151	gga-mir-3538	1	0	NA	NA	NA
ENSGALG00000012178	PDGFB	1	128.511	0.954111	0.306287	0.00183893
ENSGALG00000051529		1	13.5012	-0.234744	0.591348	0.691393
ENSGALG00000041236	CBX7	1	57.9418	-0.299817	0.41087	0.465567
ENSGALG00000048038		1	71.9106	0.822826	0.310979	0.00814691
ENSGALG00000036867	CBX6	1	639.547	0.0684764	0.165877	0.679743
ENSGALG00000054675		1	31.9588	-0.286949	0.473213	0.54426
ENSGALG00000035636	PHYH	1	956.562	-1.08026	0.174384	5.83814e-10
ENSGALG00000016232	RPL8	1	46798.6	0.101288	0.222845	0.649452
ENSGALG00000041604	NPTXR	1	32.1829	0.136397	0.464978	0.769262
ENSGALG00000017021	ATP7B	1	10.4731	0.661901	0.736973	0.369114
ENSGALG00000016236		1	10143.6	-0.2948	0.273299	0.280733
ENSGALG00000043451	DNAL4	1	1309.32	0.103787	0.186639	0.578154
ENSGALG00000048223		1	1.37291	-0.545418	2.02396	0.78756
ENSGALG00000017022	ALG11	1	505.186	0.0241013	0.166312	0.884777
ENSGALG00000034504		1	38.7616	-0.377512	0.402473	0.348254
ENSGALG00000014575	SEPHS2L	1	3050.31	0.141487	0.162894	0.385076
ENSGALG00000028230	SUN2	1	906.316	0.040305	0.200395	0.840599
ENSGALG00000016238	MED14	1	1931.28	-0.149738	0.232682	0.519879
ENSGALG00000017023	NEK5	1	89.1117	-0.0164448	0.407087	0.967777
ENSGALG00000013424	TULP3	1	1801.21	-0.083949	0.145916	0.565071
ENSGALG00000030783	GTPBP1	1	5648.93	-0.155807	0.144387	0.280544
ENSGALG00000006682	BEND7	1	987.221	-0.350461	0.165951	0.0347005
ENSGALG00000017024	NEK3	1	529.512	0.310227	0.178184	0.0816755
ENSGALG00000016241	ATP6AP2	1	2425.04	-0.419837	0.143254	0.00338188
ENSGALG00000013422	RHNO1	1	139.773	0.0709964	0.27113	0.793434
ENSGALG00000041766	JOSD1	1	394.58	0.0963782	0.198745	0.627722
ENSGALG00000043593		1	1585.6	0.0480515	0.181208	0.790877
ENSGALG00000019316	TOMM22	1	7165.84	-0.222771	0.213891	0.297636
ENSGALG00000013420	FOXM1	1	1627.13	-0.252782	0.214651	0.238939
ENSGALG00000012218	CBY1	1	789.922	-0.229251	0.189746	0.226971
ENSGALG00000017025	CKAP2	1	8079.13	-0.355051	0.222218	0.110096
ENSGALG00000016245	BCOR	1	2113.84	-0.0163159	0.298857	0.956462
ENSGALG00000012236	DMC1	1	105.496	0.0334431	0.325818	0.918246
ENSGALG00000037360	DDX17	1	7154.59	-0.0893178	0.16777	0.59446
ENSGALG00000014335	ITFG2	1	1089.9	-0.195258	0.171387	0.254588
ENSGALG00000027310	gga-mir-6672	1	0	NA	NA	NA
ENSGALG00000044020		1	417.596	-0.009508	0.352905	0.978506
ENSGALG00000034992	FRMD4A	1	432.942	0.56201	0.328291	0.0869102
ENSGALG00000041078	MID1IP1	1	2483.46	-0.0953253	0.200997	0.635312
ENSGALG00000016251		1	6009.13	-0.807905	0.171722	2.54197e-06
ENSGALG00000050213		1	62.9404	0.568384	0.398116	0.153383
ENSGALG00000032313	KDELR3	1	1462.51	0.594904	0.16436	0.000295149
ENSGALG00000017026	VPS36	1	1856.31	-0.0184311	0.150575	0.902579
ENSGALG00000025161	gga-mir-1460	1	0	NA	NA	NA
ENSGALG00000012254	KCNJ4	1	27.601	-0.427079	0.421857	0.311357
ENSGALG00000016254	OTC	1	0.300866	-1.96344	4.04236	0.627168
ENSGALG00000053778		1	6.76731	-0.571312	0.968547	0.555282
ENSGALG00000014331	FKBP4	1	12464.4	-0.107642	0.233602	0.644947
ENSGALG00000028083	THSD1	1	243.381	1.0505	0.325124	0.00123322
ENSGALG00000033226	FAM107B	1	8697.43	0.383446	0.168409	0.0227936
ENSGALG00000032257	CSNK1E	1	1825.16	0.0786104	0.148346	0.596174
ENSGALG00000017029		1	2.18088	-0.0797137	1.65664	0.961623
ENSGALG00000012272	TMEM184B	1	3348.22	-0.274707	0.153826	0.0741265
ENSGALG00000036284	RPGR	1	606.489	0.138178	0.173377	0.425462
ENSGALG00000012277	MAFF	1	1616.67	-0.135007	0.195485	0.489798
ENSGALG00000035201	HSPA14	1	1762.04	-0.158257	0.20606	0.442478
ENSGALG00000017031		1	222.249	-0.310758	0.227475	0.171902
ENSGALG00000043100	SRPX	1	762.894	0.463447	0.166355	0.00533815
ENSGALG00000012281	PLA2G6	1	1081.77	-0.471148	0.206686	0.0226352
ENSGALG00000037656	NECAP1	1	4722.48	-0.0588729	0.155656	0.705265
ENSGALG00000013920	SUV39H2	1	1562.15	-0.24617	0.169363	0.146084
ENSGALG00000016258	SYTL5	1	5.00292	1.74034	1.2719	0.171218
ENSGALG00000013926	DCLRE1C	1	352.617	0.0433348	0.257937	0.866579
ENSGALG00000016259	DYNLT3	1	1650.62	-0.379473	0.211611	0.0729317
ENSGALG00000014329	FOXJ2	1	1514.33	-0.0258098	0.167583	0.877601
ENSGALG00000012285	BAIAP2L2	1	10.3133	-0.275327	0.708457	0.697551
ENSGALG00000016261	CYBB	1	118.429	1.04707	0.287427	0.00026957
ENSGALG00000000451	MEIG1	1	9.09351	0.602395	0.814089	0.459323
ENSGALG00000051690		1	1.10436	-3.71689	2.77811	0.180923
ENSGALG00000014324	SLC2A14	1	985.197	-0.112471	0.221276	0.611254
ENSGALG00000006633	TMEM243	1	114.74	0.76415	0.285877	0.00751744
ENSGALG00000036897	SLC16A8	1	5.46616	-0.397923	0.987846	0.687081
ENSGALG00000041823	PICK1	1	1200.35	-0.056923	0.173142	0.742333
ENSGALG00000030844	DMTF1	1	1001.57	0.149518	0.153257	0.329262
ENSGALG00000053547		1	0.100757	0.710792	4.07651	0.86158
ENSGALG00000016262	XK	1	11.9509	0.307346	0.749874	0.681907
ENSGALG00000012290	SOX10	1	17.5631	3.24988	0.849505	0.000130445
ENSGALG00000016265	LANCL3	1	144.018	-0.119518	0.308139	0.698112
ENSGALG00000027772	NANOG	1	0.97912	1.07018	2.67575	0.689191
ENSGALG00000016266	PRRG1	1	1790.48	0.0904794	0.157272	0.565084
ENSGALG00000014280	AICDA	1	2.3037	-0.35944	1.35825	0.79129
ENSGALG00000012291	POLR2F	1	2584.5	-0.321649	0.193901	0.0971496
ENSGALG00000033788		1	4.12103	1.42526	1.2026	0.235956
ENSGALG00000047320	MFAP5	1	1441.5	0.408525	0.249677	0.101794
ENSGALG00000012293	C22orf23	1	57.3323	0.974063	0.383819	0.0111547
ENSGALG00000030324	ELAPOR2	1	191.826	0.658033	0.276483	0.0173121
ENSGALG00000040184	RIMKLB	1	972.715	0.172622	0.192928	0.370922
ENSGALG00000012265	MICALL1	1	1502.52	-0.616582	0.270296	0.0225403
ENSGALG00000050720		1	15.9851	0.91251	0.904735	0.31317
ENSGALG00000016268		1	52.5908	0.0950766	0.368673	0.796493
ENSGALG00000017032	SLC25A15	1	1358.5	-0.646525	0.162794	7.14448e-05
ENSGALG00000036447		1	113.723	0.18397	0.509551	0.718067
ENSGALG00000051209		1	211.579	0.379401	0.443152	0.391919
ENSGALG00000006576	GRM3	1	6.64167	1.32625	1.02703	0.196587
ENSGALG00000012299	ANKRD54	1	1857.18	-0.0460241	0.158763	0.771899
ENSGALG00000054682		1	0	NA	NA	NA
ENSGALG00000012296	EIF3L	1	10851.2	0.108783	0.166483	0.513487
ENSGALG00000052883		1	0.300617	0.426593	4.0364	0.915831
ENSGALG00000017033	MRPS31	1	5056.3	-0.500649	0.226685	0.0272044
ENSGALG00000006563	SEMA3D	1	2906.61	0.284853	0.185296	0.124222
ENSGALG00000054550		1	10.6951	-0.188699	0.705392	0.789077
ENSGALG00000052583		1	1.50483	2.8337	2.09471	0.176125
[truncated: 22,357 more rows]

## Sheet: AT ENRICHED GENES
GENE ID	GENE NAME	chromosome	baseMean	log2FoldChange (SAN/At)	lfcSE	pvalue
ENSGALG00000016981	SPERT	1	29.902	-5.79627	0.980596	3.40099e-09
ENSGALG00000023626	NTN1	18	1792.73	-5.16308	0.349845	2.72566e-49
ENSGALG00000012890	DGKI	1	373.804	-4.87218	0.317593	4.07261e-53
ENSGALG00000038543	KCNH7	7	2004.33	-4.78045	0.711479	1.82945e-11
ENSGALG00000050754		3	15.5814	-4.77175	0.931529	3.01533e-07
ENSGALG00000000120	BMP10	22	13645.2	-4.31151	0.385151	4.34693e-29
ENSGALG00000004572	NPPC	21	196.133	-4.29993	0.31688	6.06604e-42
ENSGALG00000015237	PPIL6	3	178.698	-4.20745	0.340749	5.01579e-35
ENSGALG00000046861		6	100.32	-3.96843	0.549603	5.17812e-13
ENSGALG00000028402		5	14.9758	-3.92521	0.849964	3.87301e-06
ENSGALG00000004574	NPPA	21	34760.5	-3.79004	0.266329	5.91478e-46
ENSGALG00000027166	ART7B	1	53.7986	-3.70519	0.533237	3.69248e-12
ENSGALG00000035104	HAND1	13	1181.84	-3.66178	0.372552	8.45294e-23
ENSGALG00000029073		Z	32.4408	-3.65243	0.665504	4.06014e-08
ENSGALG00000016912	EDNRB	1	5304.92	-3.62586	0.312518	4.0209e-31
ENSGALG00000047552		1	11.6803	-3.61938	1.36952	0.00822226
ENSGALG00000041634	ACTG2	22	2946.85	-3.60004	0.358302	9.42478e-24
ENSGALG00000011314	LRRC3B	2	722.99	-3.58928	0.337875	2.32733e-26
ENSGALG00000052008		11	19.8305	-3.48763	0.652735	9.13683e-08
ENSGALG00000004849	WSCD2	15	64.1742	-3.47976	0.480021	4.19295e-13
ENSGALG00000028991	RNP	21	11.349	-3.31095	1.0206	0.00117818
ENSGALG00000030932	NKX2-3	6	251.843	-3.22381	0.505725	1.83403e-10
ENSGALG00000016558	VEGFD	1	475.846	-3.22261	0.450418	8.38588e-13
ENSGALG00000009081	ZNF106	5	7039.78	-3.21236	0.38212	4.21846e-17
ENSGALG00000041404	SALL3	2	501.212	-3.20071	0.400101	1.24666e-15
ENSGALG00000012505	LRFN5	5	822.63	-3.1987	0.283555	1.63451e-29
ENSGALG00000002845	CTNNA3	6	8809.53	-3.18488	0.313748	3.27745e-24
ENSGALG00000003588	IRX5	11	168.638	-3.05336	0.336488	1.14503e-19
ENSGALG00000048295	IRX6	11	315.209	-3.05204	0.307802	3.56157e-23
ENSGALG00000043582		2	56.1377	-3.05007	0.522722	5.37984e-09
ENSGALG00000017212	GPR83	1	24.0118	-3.05004	0.800194	0.000138054
ENSGALG00000052517		7	14.685	-3.02374	1.16334	0.00934443
ENSGALG00000008262	RASGRF1	10	691.167	-2.97762	0.305934	2.18289e-22
ENSGALG00000051537		3	13.9461	-2.96108	2.24786	0.187741
ENSGALG00000005621	CAMK2A	13	575.837	-2.95471	0.267165	1.9727e-28
ENSGALG00000015602	CKMT2	Z	108.015	-2.94606	0.348714	2.95432e-17
ENSGALG00000054998		4	76.2447	-2.94107	0.526866	2.37499e-08
ENSGALG00000032749		Z	14.8731	-2.92789	0.726643	5.59351e-05
ENSGALG00000009724	GREM1	5	69.219	-2.92376	0.43638	2.08371e-11
ENSGALG00000004448	BRINP2	8	251.29	-2.83614	0.303551	9.34746e-21
ENSGALG00000039812		4	13.7644	-2.83388	0.771385	0.000239011
ENSGALG00000041921	CWH43	4	45.9428	-2.80252	0.624607	7.22844e-06
ENSGALG00000050089		7	237.426	-2.79965	1.52341	0.0660995
ENSGALG00000005754		11	13.6375	-2.77288	0.705546	8.49038e-05
ENSGALG00000051388		9	93.6656	-2.75599	0.497136	2.96086e-08
ENSGALG00000038984		23	104.582	-2.7372	0.413287	3.51995e-11
ENSGALG00000054791		9	54.2019	-2.71923	0.580723	2.83407e-06
ENSGALG00000004518		Z	2567.73	-2.71511	0.328075	1.2751e-16
ENSGALG00000007972	TRPC5	4	27.9397	-2.69422	0.644932	2.94698e-05
ENSGALG00000015488	GJA8	1	957.298	-2.68124	0.337181	1.83628e-15
ENSGALG00000051538		4	84.8163	-2.67878	0.547808	1.00836e-06
ENSGALG00000016866	FGF14	1	105.843	-2.67811	0.414532	1.04314e-10
ENSGALG00000016388	KLHL34	1	283.701	-2.66142	0.456308	5.45966e-09
ENSGALG00000054351		11	20.1767	-2.63436	0.869598	0.0024504
ENSGALG00000051229		7	437.21	-2.62957	1.72414	0.127222
ENSGALG00000054169		9	27.7758	-2.61948	0.953277	0.00599843
ENSGALG00000015115	MAMDC2	Z	303.133	-2.60659	0.311778	6.25025e-17
ENSGALG00000032404	MYH1C	18	318.341	-2.59784	0.54417	1.80652e-06
ENSGALG00000019361	TAFA2	1	409.61	-2.59696	0.799119	0.00115494
ENSGALG00000009100	FSHR	3	84.2053	-2.58212	0.4528	1.18015e-08
ENSGALG00000005400	CACNA2D3	12	35.4056	-2.56643	0.54357	2.34188e-06
ENSGALG00000029768	PTGDR	5	277.516	-2.5466	0.288213	9.93596e-19
ENSGALG00000027583	PLN	3	721.296	-2.5423	0.282075	2.0073e-19
ENSGALG00000042045	IRX3	11	156.323	-2.52842	0.397871	2.08612e-10
ENSGALG00000001793	MYL10	19	594.161	-2.52694	0.282636	3.86967e-19
ENSGALG00000005292	KLHL40	2	83.3479	-2.52662	0.403717	3.88986e-10
ENSGALG00000052741		7	612.596	-2.5172	1.2963	0.0521568
ENSGALG00000014858	ADCYAP1	2	12554	-2.47137	0.265663	1.36963e-20
ENSGALG00000019175		1	13.1318	-2.46731	0.75579	0.00109639
ENSGALG00000005297	HHATL	2	213.558	-2.44971	0.259015	3.1449e-21
ENSGALG00000008914	NRAP	6	238.647	-2.43941	0.313034	6.55504e-15
ENSGALG00000007720	AIFM3	15	1288.21	-2.43752	0.295286	1.52159e-16
ENSGALG00000050403	LYPD1	7	533.282	-2.4197	0.321799	5.50737e-14
ENSGALG00000011447	GADL1	2	68.1674	-2.40311	0.430986	2.46316e-08
ENSGALG00000033271	PFKM	33	1200.07	-2.39568	0.221615	3.08369e-27
ENSGALG00000006172	ABCC8	5	2785.84	-2.35468	0.348548	1.42162e-11
ENSGALG00000027255	NRXN3	5	1340.62	-2.34656	0.409854	1.0321e-08
ENSGALG00000017052	CCNA1	1	18.5265	-2.34426	0.626463	0.000182524
ENSGALG00000013615	MTUS1	4	5280.46	-2.33842	0.210433	1.0916e-28
ENSGALG00000049262		11	93.4406	-2.31217	0.358204	1.08303e-10
ENSGALG00000015080	SLC24A2	Z	83.3618	-2.30509	0.384208	1.97795e-09
ENSGALG00000004449	CYP3A5	14	19.3187	-2.2932	0.808961	0.00458617
ENSGALG00000051003		7	16.512	-2.28779	0.881915	0.00948346
ENSGALG00000026658	LACTBL1	21	36.307	-2.27186	0.487216	3.11728e-06
ENSGALG00000020505	KCNJ11	5	347.007	-2.27037	0.272981	9.02533e-17
ENSGALG00000031058		18	78.5377	-2.26751	0.373348	1.25189e-09
ENSGALG00000005257		8	10114.7	-2.26647	0.325148	3.15644e-12
ENSGALG00000030034	G6PC1	27	110.756	-2.25708	0.381896	3.41693e-09
ENSGALG00000005718	BHLHE23	20	43.9989	-2.24963	0.471589	1.83938e-06
ENSGALG00000048918		3	188.826	-2.24942	0.283017	1.8955e-15
ENSGALG00000003105	ANKFN1	18	34.8423	-2.24924	0.569581	7.84963e-05
ENSGALG00000009572	ADAMTS20	1	2627.76	-2.24301	0.402263	2.46153e-08
ENSGALG00000040444	SEMA3C	1	481.21	-2.22794	0.442859	4.88428e-07
ENSGALG00000004631	DRAXIN	21	1912.06	-2.206	0.272115	5.19512e-16
ENSGALG00000050290		6	12.4319	-2.2034	0.871582	0.0114698
ENSGALG00000029679	PLEKHA7	5	5521.28	-2.19484	0.252605	3.66266e-18
ENSGALG00000046681		W	10.6488	-2.18294	0.924986	0.0182762
ENSGALG00000002886	NKX2-5	13	4227.22	-2.18022	0.744341	0.00339993
ENSGALG00000011551	JCHAIN	4	11.9754	-2.17369	0.759858	0.00422769
ENSGALG00000008508	PYGB	3	10946.3	-2.15484	0.211139	1.86788e-24
ENSGALG00000023099	ZDHHC22	5	49.5545	-2.14413	0.756378	0.00458631
ENSGALG00000005483	CDH13	11	2599.92	-2.13412	0.353819	1.62272e-09
ENSGALG00000006112	SCN5A	2	8162.49	-2.12927	0.493937	1.6266e-05
ENSGALG00000035602	ZNF536	11	227.965	-2.11807	0.412452	2.81664e-07
ENSGALG00000036360	TRPV4	15	95.3593	-2.11568	0.323118	5.84266e-11
ENSGALG00000052907		7	3192.08	-2.11016	1.07297	0.0492222
ENSGALG00000052297		1	13.9192	-2.10161	0.798879	0.00852082
ENSGALG00000005062	FOXN4	15	14.2242	-2.08562	0.89967	0.0204384
ENSGALG00000050750	NRN1L	11	158.104	-2.0821	0.256014	4.19543e-16
ENSGALG00000021163		Z	33.142	-2.08137	0.445853	3.03718e-06
ENSGALG00000012691	ALDH1L2	1	7263.82	-2.0731	0.272834	2.99867e-14
ENSGALG00000003126	ERBB4	7	1364.97	-2.06883	0.744843	0.00547716
ENSGALG00000012537	KCNJ3	7	175.691	-2.0598	0.44171	3.11275e-06
ENSGALG00000028612		18	525.89	-2.05935	0.485559	2.22329e-05
ENSGALG00000054973	C1QL4	33	29.7969	-2.04996	0.535714	0.000129931
ENSGALG00000002466	SLC2A5	21	129.041	-2.04143	0.345605	3.48726e-09
ENSGALG00000045131		W	22.8964	-2.03737	0.634539	0.0013237
ENSGALG00000012623	CFC1	Z	2429.45	-2.02839	0.177	2.09871e-30
ENSGALG00000009791	PROX1	3	688.656	-2.02127	0.424876	1.96176e-06
ENSGALG00000041122	SLC17A8	1	17.3747	-2.01886	0.630227	0.00135824
ENSGALG00000012190	TMEM163	7	3520.22	-2.01069	0.17632	4.0101e-30
ENSGALG00000015140		2	507.131	-2.00551	0.30598	5.58684e-11
ENSGALG00000032628	SRCIN1	27	1434.75	-1.99455	0.356608	2.23033e-08
ENSGALG00000053982		1	947.524	-1.9892	0.268101	1.17461e-13
ENSGALG00000014989	S100Z	Z	54.4975	-1.98771	0.450437	1.02017e-05
ENSGALG00000038512	AGTR1	9	69.7958	-1.98576	0.410734	1.33377e-06
ENSGALG00000053013		2	1162.48	-1.98294	0.376027	1.33918e-07
ENSGALG00000048920		1	14.9158	-1.98224	0.769316	0.00997709
ENSGALG00000016859		1	543.763	-1.98016	0.241198	2.21777e-16
ENSGALG00000048310		7	7355.46	-1.97543	1.25428	0.115269
ENSGALG00000012197	ACMSD	7	108.71	-1.96991	0.348463	1.5755e-08
ENSGALG00000037744	CACNA1S	26	257.446	-1.96402	0.36608	8.09424e-08
ENSGALG00000005458	RPL3L	14	110.641	-1.95211	0.299231	6.85719e-11
ENSGALG00000032863		3	11.897	-1.92467	0.767536	0.0121557
ENSGALG00000007740		4	159.389	-1.92463	0.378136	3.58445e-07
ENSGALG00000035981	NOTO	4	30.1131	-1.91325	0.530656	0.000311615
ENSGALG00000048017		4	248.195	-1.89675	0.402599	2.46179e-06
ENSGALG00000008100	RAPSN	5	16.9516	-1.89196	0.669558	0.00471801
ENSGALG00000009415	SMOC1	5	332.604	-1.88805	0.360406	1.61745e-07
ENSGALG00000035237		7	2851.35	-1.87699	0.279318	1.81845e-11
ENSGALG00000029286		4	134.686	-1.8732	0.378344	7.3814e-07
ENSGALG00000007980	KCNG1	20	119.937	-1.87147	0.350991	9.71577e-08
ENSGALG00000050747		1	10.0371	-1.86739	1.1874	0.115795
ENSGALG00000054655	ALPK2	Z	1968.51	-1.85661	0.346244	8.22425e-08
ENSGALG00000005252	GPR88	8	162.228	-1.85168	0.273197	1.22007e-11
ENSGALG00000013722	SEMA3B	12	1061.97	-1.84928	0.33913	4.95206e-08
ENSGALG00000040802	SOWAHA	13	16.8141	-1.84541	0.628762	0.00333559
ENSGALG00000012845	MYLK4	2	1165.01	-1.84483	0.331513	2.62328e-08
ENSGALG00000029935		2	818.302	-1.83932	0.294595	4.27774e-10
ENSGALG00000053917	CD164	3	26536.9	-1.82866	0.172383	2.73227e-26
ENSGALG00000004491	DMGDH	Z	695.727	-1.82735	0.158116	6.8012e-31
ENSGALG00000029882	MYADML2	18	17.71	-1.82429	0.713367	0.0105492
ENSGALG00000051750		15	10.1046	-1.81878	0.820325	0.026613
ENSGALG00000014127		4	29.3481	-1.81672	0.642173	0.00466914
ENSGALG00000042570		1	2468.26	-1.81384	0.194138	9.36316e-21
ENSGALG00000026471	CRIP2	8	16110.5	-1.79543	0.264243	1.08589e-11
ENSGALG00000007078	ENTPD1	6	2645.8	-1.79514	0.21634	1.06057e-16
ENSGALG00000035594	MYH7	19	246248	-1.78879	0.261013	7.21902e-12
ENSGALG00000021340	CA9	Z	5222.83	-1.78806	0.187854	1.75968e-21
ENSGALG00000049383		2	31.7906	-1.7866	0.449359	7.01163e-05
ENSGALG00000005790		20	67.1992	-1.77861	0.415523	1.86557e-05
ENSGALG00000012422		1	69.359	-1.77665	0.316318	1.94696e-08
ENSGALG00000012396	PTGER2	5	105.544	-1.77546	0.311615	1.21499e-08
ENSGALG00000006344	GSTT1	15	351.589	-1.77468	0.271431	6.22574e-11
ENSGALG00000008888	IL1RAPL2	4	248.706	-1.77268	0.243219	3.13666e-13
ENSGALG00000035393	LRRC14B	2	10.405	-1.76388	0.731768	0.0159334
ENSGALG00000006947	BDH1A	9	14702.4	-1.75679	0.195934	3.06806e-19
ENSGALG00000054474		Z	16.2745	-1.74723	0.675817	0.00972785
ENSGALG00000013372	IL7R	Z	18.243	-1.74713	0.745145	0.0190432
ENSGALG00000039587	SYNDIG1	3	65.0522	-1.73833	0.34275	3.94263e-07
ENSGALG00000012989	NINJ2	1	1204.58	-1.73353	0.17805	2.11252e-22
ENSGALG00000047347	Metazoa_SRP	5	14.0198	-1.73223	0.705812	0.0141186
ENSGALG00000032259	SIX3	3	14.9016	-1.72551	0.776601	0.026292
ENSGALG00000005359		6	147.013	-1.72534	1.22591	0.159311
ENSGALG00000048441		25	22.4692	-1.72412	0.903507	0.0563583
ENSGALG00000050688		2	777.41	-1.7196	0.361889	2.01678e-06
ENSGALG00000009422	RGS10	6	3727.62	-1.71485	0.287749	2.52966e-09
ENSGALG00000016224	MAOA	1	2306.13	-1.71216	0.212682	8.25769e-16
ENSGALG00000027980	NANOS1	6	3754.9	-1.70791	0.235466	4.06662e-13
ENSGALG00000048682	MYLPF	KZ626839.1	25.1131	-1.70642	0.601674	0.00456652
ENSGALG00000039452	GJA5	1	15325.6	-1.69825	0.321733	1.30285e-07
ENSGALG00000028975		4	139.303	-1.69744	0.520727	0.00111513
ENSGALG00000016802		1	25.1449	-1.69598	0.527949	0.00131635
ENSGALG00000004121	LPAR4	4	4800.54	-1.68658	0.226608	9.8631e-14
ENSGALG00000053051		7	10.0571	-1.67789	0.757817	0.0268211
ENSGALG00000013822	TXLNB	3	153.803	-1.67539	0.441181	0.000146156
ENSGALG00000006835	TNNC2	20	1609.45	-1.67473	0.289357	7.13264e-09
ENSGALG00000004436	CYP3A4	14	1109.23	-1.67333	0.218964	2.13804e-14
ENSGALG00000052592	TMEM82	21	254.115	-1.67053	0.307419	5.50936e-08
ENSGALG00000007090	CPN1	6	839.517	-1.66879	0.245879	1.14467e-11
ENSGALG00000004103	FAM81A	10	28.7533	-1.66392	0.49791	0.000832367
ENSGALG00000018293	gga-mir-133a-2	20	26.8518	-1.65537	0.721515	0.021773
ENSGALG00000024266		9	28.3883	-1.65215	0.533703	0.00196393
ENSGALG00000048422		1	10.5861	-1.65144	1.2384	0.182358
ENSGALG00000032418	RAB26	14	461.639	-1.6497	0.235227	2.32904e-12
ENSGALG00000001434	STOM	17	595.89	-1.64858	0.234709	2.15678e-12
ENSGALG00000036638	TACR1	22	88.0571	-1.64284	0.401803	4.33881e-05
ENSGALG00000004334	MYLK3	11	8965.97	-1.64153	0.196039	5.59353e-17
ENSGALG00000015618		Z	130.406	-1.63836	0.357418	4.56438e-06
ENSGALG00000052635		8	18.938	-1.63825	0.905731	0.0704884
ENSGALG00000053105	RAP1GAP	21	90.9118	-1.63609	0.465827	0.000444387
ENSGALG00000012830	IRF4	2	29.3151	-1.62907	0.561239	0.00370038
ENSGALG00000051502		Z	11.7649	-1.62308	0.761451	0.033043
ENSGALG00000049569		6	20.5939	-1.6208	0.516752	0.00170971
ENSGALG00000047464	FBXL22	10	3326.85	-1.61119	0.321729	5.50211e-07
ENSGALG00000047706		8	62.7186	-1.61109	0.36065	7.92609e-06
ENSGALG00000005135	SERPINE2	9	34678.4	-1.60725	0.169185	2.09951e-21
ENSGALG00000013085	PTPRO	1	928.558	-1.60602	0.21649	1.18519e-13
ENSGALG00000047998		33	742.787	-1.60584	0.252848	2.13899e-10
ENSGALG00000054099		15	88.9482	-1.60464	0.305339	1.47801e-07
ENSGALG00000005448	MYL3	2	185144	-1.6018	0.20583	7.13092e-15
ENSGALG00000000112	PLP1	4	12.5506	-1.60057	0.669022	0.0167383
ENSGALG00000051376		2	38.4554	-1.59375	0.415233	0.000123939
ENSGALG00000047968		4	22.1326	-1.59331	0.538075	0.00306514
ENSGALG00000008947	PAK5	3	215.167	-1.59099	0.347437	4.66714e-06
ENSGALG00000009403	GRK5	6	357.349	-1.58886	0.244209	7.7095e-11
ENSGALG00000047158		7	11.0191	-1.58841	0.929135	0.0873478
ENSGALG00000014988	POPDC2	1	15824.8	-1.58718	0.172055	2.83976e-20
ENSGALG00000007867	SLC9A5	11	217.462	-1.58066	0.309005	3.13209e-07
ENSGALG00000052720		5	17.0793	-1.57876	0.58103	0.00658433
ENSGALG00000004418	SSTR2	18	67.9934	-1.57513	0.437417	0.000317021
ENSGALG00000038433	SPON2	4	399.502	-1.5709	0.277059	1.42874e-08
ENSGALG00000005662	AMPD3	5	323.101	-1.56938	0.299504	1.60655e-07
ENSGALG00000012216	BMPR1B	4	144.233	-1.56726	0.391458	6.23696e-05
ENSGALG00000050175		1	29.9831	-1.56589	0.570663	0.00606985
ENSGALG00000020788	CCDC141	7	52575.2	-1.56443	0.352872	9.27553e-06
ENSGALG00000033522		27	2672.84	-1.55718	0.218824	1.11006e-12
ENSGALG00000000505	KCNH6	27	2999.48	-1.55301	0.32018	1.23196e-06
ENSGALG00000028520	CST3	3	16606.8	-1.55283	0.188722	1.90181e-16
ENSGALG00000039238	SALL1	11	261.71	-1.54731	0.231308	2.24098e-11
ENSGALG00000013022	CACNA1C	1	2393	-1.54609	0.872107	0.0762586
ENSGALG00000034274	GRAMD4	1	2318.42	-1.54558	0.227878	1.18144e-11
ENSGALG00000011889		5	192.837	-1.54172	0.208385	1.37819e-13
ENSGALG00000012712	RBM24	2	17958.7	-1.53899	0.224377	6.93592e-12
ENSGALG00000037826		33	900.937	-1.53702	0.277163	2.93081e-08
ENSGALG00000031754	KCNG2	2	520.477	-1.53694	0.270516	1.33521e-08
ENSGALG00000027887		Z	37.0047	-1.53548	1.01909	0.131884
ENSGALG00000029944	FAM222A	15	129.497	-1.52945	0.397168	0.000117687
ENSGALG00000043027	HEPHL1	1	24.0727	-1.52702	0.567331	0.00711142
ENSGALG00000003886	SGCD	13	3055.57	-1.52637	0.327603	3.17438e-06
ENSGALG00000000863	DYRK3	26	2564.43	-1.52419	0.271795	2.04818e-08
ENSGALG00000037864	MYH1A	18	391.083	-1.52176	0.382899	7.05779e-05
ENSGALG00000014997	PLA1A	1	1188.09	-1.51624	0.232692	7.21846e-11
ENSGALG00000001723		8	15.4601	-1.51408	0.748192	0.0430056
ENSGALG00000009704	CHST15	6	608.254	-1.50643	0.211155	9.73493e-13
ENSGALG00000013073	UPP1	2	517.599	-1.50418	0.187527	1.04766e-15
ENSGALG00000029971	PGLYRP2	30	16.1786	-1.49408	0.657489	0.0230627
ENSGALG00000013225	VAT1L	11	798.124	-1.48994	0.242632	8.21498e-10
ENSGALG00000008148	MYBPC3	5	133849	-1.4896	0.284024	1.56612e-07
ENSGALG00000051152		6	2948.92	-1.48795	0.382235	9.91074e-05
ENSGALG00000011560	PACRG	3	318.009	-1.48558	0.263094	1.63697e-08
ENSGALG00000011562	PRKN	3	244.305	-1.48505	0.215516	5.55283e-12
ENSGALG00000007140	NRP1	2	1796.12	-1.48208	0.283354	1.6904e-07
ENSGALG00000027492	TEDC1	8	1630.1	-1.4819	0.163057	1.0071e-19
ENSGALG00000010268		4	65.4789	-1.48031	0.317834	3.20091e-06
ENSGALG00000038722	SORBS1	6	5993.14	-1.47933	0.336081	1.07406e-05
ENSGALG00000026091	CACNG4	18	193.267	-1.47869	0.362462	4.51157e-05
ENSGALG00000008969	EPCAM	3	355.916	-1.47828	0.4045	0.00025761
ENSGALG00000046550		4	2731.46	-1.47585	0.207623	1.17462e-12
ENSGALG00000012541	MB	1	868.772	-1.47415	0.314973	2.86535e-06
ENSGALG00000033635	PTGS2	8	2874.27	-1.47239	0.347762	2.29671e-05
ENSGALG00000047682		W	71.0723	-1.47127	0.41998	0.000459731
ENSGALG00000033034	SLC25A34	21	514.225	-1.46738	0.191245	1.68269e-14
ENSGALG00000050319		2	55.0338	-1.46321	0.490493	0.00285302
ENSGALG00000009844	ACTC1	5	196199	-1.46242	0.236225	5.98692e-10
ENSGALG00000053422		17	16.1999	-1.4621	0.660105	0.0267633
ENSGALG00000052302		8	10236.8	-1.45772	0.476734	0.00223033
ENSGALG00000016608	ADCY3	3	1540.22	-1.45368	0.292247	6.55361e-07
ENSGALG00000001304		21	816.63	-1.45139	0.21822	2.90988e-11
ENSGALG00000053246	OCM2	14	179.78	-1.44623	0.288425	5.32449e-07
ENSGALG00000035879	ITGA7	33	3439.98	-1.44487	0.252387	1.03555e-08
ENSGALG00000041417	ACADSB	6	10837.4	-1.44394	0.203622	1.32882e-12
ENSGALG00000054240		30	20.7788	-1.4439	0.805315	0.072978
ENSGALG00000009759	SLC16A7	1	821.858	-1.44124	0.320491	6.8929e-06
ENSGALG00000002893	STC2	13	1509.84	-1.43932	0.264653	5.3724e-08
ENSGALG00000005078	NUP210	12	1022.44	-1.43915	0.23839	1.5706e-09
ENSGALG00000043064	EXFABP	17	399.705	-1.43897	0.242578	2.99322e-09
ENSGALG00000005524	NTSR1	20	129.869	-1.43484	0.490024	0.00341044
ENSGALG00000042289	SUSD5	2	48.6763	-1.43224	0.377072	0.000145681
ENSGALG00000053325		Z	11.9072	-1.42787	0.725564	0.049074
ENSGALG00000004885	SLC24A5	10	1003.07	-1.42326	0.27224	1.7139e-07
ENSGALG00000023936		21	360.356	-1.42306	0.900244	0.113937
ENSGALG00000011680	EPHA5	4	507.937	-1.4209	0.335271	2.25441e-05
ENSGALG00000010258	LTBP2	5	2729.31	-1.41986	0.457689	0.00192066
ENSGALG00000017405	NPR3	Z	11896	-1.41848	0.276173	2.80369e-07
ENSGALG00000055073		9	1443.92	-1.41739	0.207863	9.17451e-12
ENSGALG00000016382	MBTPS2	1	801.709	-1.41486	0.211662	2.31646e-11
ENSGALG00000044085	IQCJ	9	42.4327	-1.41279	0.425227	0.000892299
ENSGALG00000029606	MYH1E	18	381.379	-1.40591	0.391937	0.00033439
ENSGALG00000007311	CLDN2	4	152.862	-1.40586	0.479669	0.00337991
ENSGALG00000009880	INPP4B	4	1029.21	-1.40134	0.300606	3.13575e-06
ENSGALG00000035761		2	447.805	-1.39983	0.308948	5.87159e-06
ENSGALG00000041273	KIAA0319	2	522.516	-1.39711	0.38898	0.000328486
ENSGALG00000013281	RSPH6A	4	11.3278	-1.39658	0.698543	0.0455792
ENSGALG00000054732		5	26.4159	-1.39238	0.689586	0.0434713
ENSGALG00000028871	SLC38A3	12	211.282	-1.38887	0.487248	0.00436591
ENSGALG00000013634	LRRC2	Z	90.0913	-1.38862	0.331659	2.82799e-05
ENSGALG00000015624	VCAN	Z	16329.9	-1.38698	0.91257	0.128546
ENSGALG00000025199	gga-mir-1555	1	20.4927	-1.38669	0.692583	0.0452635
ENSGALG00000015345		3	602.814	-1.38668	0.181521	2.18566e-14
ENSGALG00000009805	PPM1H	1	136.893	-1.38662	0.282525	9.20381e-07
ENSGALG00000047534		1	70.4393	-1.38088	0.399595	0.000548855
ENSGALG00000026875		21	564.743	-1.38059	0.300812	4.44254e-06
ENSGALG00000034675	XKR9	2	20.9711	-1.3796	0.540124	0.0106422
ENSGALG00000027742		28	98.9319	-1.37707	0.293434	2.69282e-06
ENSGALG00000003578	FN1	7	115731	-1.3746	0.705516	0.0513716
ENSGALG00000041365	SALL4	20	371.517	-1.37335	0.300928	5.02555e-06
ENSGALG00000031487	FSTL4	13	377.835	-1.37227	0.2597	1.26363e-07
ENSGALG00000000994		23	24.5125	-1.37172	0.586802	0.0194069
ENSGALG00000040296		MT	11.0623	-1.36841	0.857119	0.110372
ENSGALG00000004260		5	46.5708	-1.36578	0.373127	0.000251874
ENSGALG00000006190	FHL1	4	6648.87	-1.36495	0.208264	5.60378e-11
ENSGALG00000000585	MYL4	27	16677.9	-1.36063	0.444294	0.00219524
ENSGALG00000009480	DOCK4	1	1285.91	-1.3597	0.459294	0.00307233
ENSGALG00000000336	PPP1R12B	26	10023.7	-1.35825	0.320003	2.19089e-05
ENSGALG00000004809	PPIF	6	2035.23	-1.35467	0.251663	7.33042e-08
ENSGALG00000014144	CORIN	4	3934.79	-1.35428	0.417158	0.00116853
ENSGALG00000054831	TMEM121	8	4823.03	-1.34899	0.202908	2.96521e-11
ENSGALG00000016797	FHL2	1	28533.8	-1.34651	0.199151	1.36776e-11
ENSGALG00000000309		26	1636.48	-1.34406	0.26897	5.82055e-07
ENSGALG00000043598		MT	59603.3	-1.34104	0.813763	0.0993633
ENSGALG00000051596		7	13.7071	-1.33912	0.695459	0.0541636
ENSGALG00000016430	PDHA2	1	7597.04	-1.33311	0.192905	4.82284e-12
ENSGALG00000051841		4	48.9891	-1.33014	0.391346	0.000676579
ENSGALG00000021620	TMEM59L	28	21.5516	-1.31861	0.603206	0.0288156
ENSGALG00000043556		Z	61.9327	-1.31683	0.459914	0.00419362
ENSGALG00000054516		31	37.3099	-1.31619	0.916991	0.151191
ENSGALG00000008659	HACD1	2	1977.34	-1.31507	0.194576	1.39325e-11
ENSGALG00000001645	KCNT1	17	197.143	-1.31227	0.453189	0.0037838
ENSGALG00000012715	CAP2	2	8833.92	-1.31209	0.181939	5.52658e-13
ENSGALG00000015542	PLPPR1	Z	4377.46	-1.31208	0.193423	1.17328e-11
ENSGALG00000034326	TMEM158	2	700.301	-1.31073	0.22163	3.33826e-09
ENSGALG00000049230		5	16.8066	-1.31004	0.646104	0.0426016
ENSGALG00000002266	OGDHL	6	201.007	-1.30993	0.366002	0.000344877
ENSGALG00000016186	PDE9A	1	210.198	-1.30921	0.2246	5.57319e-09
ENSGALG00000008177	NOS1	15	836.012	-1.30732	0.443481	0.00319992
ENSGALG00000039727		6	397.845	-1.30367	0.286129	5.2078e-06
ENSGALG00000035113	DEXI	14	78.9193	-1.30239	0.345587	0.000164158
ENSGALG00000030372	MPZ	25	11.8417	-1.30034	0.85899	0.130075
ENSGALG00000043198		7	10347.5	-1.29708	0.448001	0.00378839
ENSGALG00000030969	CLEC3B	2	713.471	-1.29675	0.200936	1.09258e-10
ENSGALG00000013223	CLEC3A	11	50.2393	-1.29649	0.481781	0.00712309
ENSGALG00000047141		3	358.245	-1.29209	0.200812	1.24047e-10
ENSGALG00000004613	P2RX5	19	877.563	-1.28964	0.265198	1.15652e-06
ENSGALG00000008701	XDH	3	15.0425	-1.28732	0.667289	0.0537094
ENSGALG00000012913	PKP2	1	5661.01	-1.28244	0.19656	6.82601e-11
ENSGALG00000016367	SNTG2	3	124.621	-1.27999	0.260286	8.7598e-07
ENSGALG00000047519		6	11.2507	-1.2798	0.71323	0.0727537
ENSGALG00000028567	MYL9	20	30348	-1.2785	0.287961	9.00215e-06
ENSGALG00000030175	FBXL2	2	1626.61	-1.27744	0.222052	8.77283e-09
ENSGALG00000027514	SCEL	1	1895.38	-1.27648	0.202033	2.64631e-10
ENSGALG00000009718	FAM53B	6	167.737	-1.27429	0.271385	2.65956e-06
ENSGALG00000036789	ADGRL2	8	6792.87	-1.27393	0.403494	0.00159267
ENSGALG00000039696	ENTPD2	17	2681.4	-1.27232	0.185355	6.68482e-12
ENSGALG00000050541		4	12.4356	-1.27188	0.916166	0.165058
ENSGALG00000029968	GADD45B	28	872.106	-1.2716	0.185668	7.44703e-12
ENSGALG00000038850	WNK2	12	3088.06	-1.27098	0.360632	0.000424575
ENSGALG00000008544	SLC8A1	3	24421.1	-1.26958	0.381702	0.000880723
ENSGALG00000043925		28	46.8177	-1.26887	0.457325	0.0055277
ENSGALG00000028183		9	11349.2	-1.26878	0.192733	4.6079e-11
ENSGALG00000010769	HPGD	4	1343.65	-1.26801	0.206444	8.14209e-10
ENSGALG00000001977	LDB3	6	4198.08	-1.26746	0.23218	4.78904e-08
ENSGALG00000026661	MSRB3	1	5364.61	-1.26559	0.197916	1.6098e-10
ENSGALG00000052208		8	15.9702	-1.26339	0.797647	0.113218
ENSGALG00000044763	GPR82	1	15.1012	-1.26246	0.851226	0.138045
ENSGALG00000009048	ABLIM1	6	3202.6	-1.26129	0.360237	0.000463038
ENSGALG00000047380		16	112.945	-1.26112	0.342214	0.000228546
ENSGALG00000006394		14	28.3834	-1.26033	0.511458	0.013732
ENSGALG00000016605	EFR3B	3	1364.87	-1.25899	0.183859	7.50996e-12
ENSGALG00000004568	CELA2A	21	32.4224	-1.25295	0.674972	0.0634101
ENSGALG00000051433		12	19.7672	-1.25187	0.806107	0.120427
ENSGALG00000045362		5	106.78	-1.25062	0.442206	0.00468176
ENSGALG00000054429		6	48.9295	-1.24932	0.447683	0.00526059
ENSGALG00000015701	CXADR	1	2856.82	-1.24513	0.24647	4.37512e-07
ENSGALG00000039173	RGMA	10	107.456	-1.24182	0.406814	0.00226904
ENSGALG00000009842	RASSF3	1	5818.6	-1.23955	0.166782	1.06827e-13
ENSGALG00000005938		14	100.06	-1.23764	0.339958	0.000272027
ENSGALG00000002728	SLC16A3	18	2162.89	-1.23717	0.272989	5.84476e-06
ENSGALG00000043172	CLVS1	2	44.5798	-1.23705	0.36684	0.000745771
ENSGALG00000037889	PTPRT	20	291.712	-1.23648	0.504559	0.0142609
ENSGALG00000039628	AFAP1L1	13	5621.68	-1.23621	0.186695	3.55485e-11
ENSGALG00000054163		1	140.571	-1.23254	0.605037	0.0416363
ENSGALG00000046564	ASB18	7	115.379	-1.23231	0.366485	0.000772349
ENSGALG00000009052	LBH	3	12389.7	-1.23136	0.169768	4.07005e-13
ENSGALG00000047018		1	23.3461	-1.23084	0.568274	0.0303162
ENSGALG00000005924		13	3450.23	-1.22989	0.160552	1.85408e-14
ENSGALG00000010614	SLC25A4	4	19714.3	-1.22915	0.174587	1.91812e-12
ENSGALG00000028759	LYPD6B	7	3000.31	-1.22811	0.234422	1.6154e-07
ENSGALG00000027771	CACNG1	18	16.1906	-1.22768	0.574768	0.0326823
ENSGALG00000014668	MCTP1	Z	241.538	-1.22476	0.217438	1.77429e-08
ENSGALG00000010342	OTOGL	1	196.977	-1.22468	0.510176	0.0163727
ENSGALG00000002390	CA6	21	35.8348	-1.22444	0.454936	0.00711408
ENSGALG00000048882		15	15.7762	-1.22383	0.703456	0.0819047
ENSGALG00000050470	OPN1LW	KZ626833.1	61.8567	-1.22243	0.747325	0.101893
ENSGALG00000039935	PDE1C	2	908.05	-1.22079	0.325636	0.000177579
ENSGALG00000013655	ZDHHC2	4	1713.59	-1.22018	0.230589	1.21258e-07
ENSGALG00000031565	NEBL	2	15134.3	-1.2179	0.324637	0.000175733
ENSGALG00000035392		MT	36.7911	-1.21745	0.795578	0.125949
ENSGALG00000048029		Z	38.7977	-1.21701	0.401669	0.00244644
ENSGALG00000041266	CNN1	30	1710.6	-1.21278	0.44451	0.00636533
ENSGALG00000047847		13	754.287	-1.21166	0.183156	3.70333e-11
ENSGALG00000026553		Z	11421.9	-1.21104	0.454585	0.00772025
ENSGALG00000035960		KZ626838.1	440.655	-1.20998	0.22798	1.11201e-07
ENSGALG00000028721	LMOD1	26	1700.22	-1.20545	0.251163	1.59073e-06
ENSGALG00000037769	NEBL	2	10771.3	-1.20322	0.332189	0.000292226
ENSGALG00000016132	IGSF5	1	39.2151	-1.20273	0.382336	0.00165658
ENSGALG00000038266	CTXN2	10	38.266	-1.19671	0.410462	0.00355101
ENSGALG00000016497	UBXN2A	3	3327.84	-1.19645	0.192832	5.48299e-10
ENSGALG00000032146	SLC4A5	22	97.4505	-1.19618	0.44873	0.0076829
ENSGALG00000008909	USP13	9	4451.51	-1.19437	0.289223	3.6344e-05
ENSGALG00000048850		8	19.6548	-1.19399	0.684069	0.0809103
ENSGALG00000053029		2	11.9356	-1.1937	0.7341	0.103935
ENSGALG00000054662		1	343.067	-1.19331	0.497238	0.0164002
ENSGALG00000039355		1	73.9236	-1.19289	0.381786	0.00178115
ENSGALG00000005284	LRRC39	8	351.343	-1.19176	0.27022	1.0321e-05
ENSGALG00000016362	SH3YL1	3	676.562	-1.19025	0.205528	6.98913e-09
ENSGALG00000000839	WNT11	1	1167.02	-1.18918	0.284976	3.00718e-05
ENSGALG00000046009		4	26.3616	-1.18722	0.542043	0.0285046
ENSGALG00000043167	TNFRSF11B	2	399.425	-1.18701	0.211673	2.04945e-08
ENSGALG00000030858	FRMD5	10	256.673	-1.18701	0.238531	6.48004e-07
ENSGALG00000004420	SDK1	14	5794.73	-1.18541	0.824672	0.150594
ENSGALG00000007098	KIF21A	1	1724.32	-1.18533	0.300933	8.18679e-05
ENSGALG00000010200	TRHDE	1	175.285	-1.18517	0.259666	5.01367e-06
ENSGALG00000004162	SLC16A6	18	675.892	-1.18472	0.222794	1.05183e-07
ENSGALG00000033885	RAP1GAP2	19	733.14	-1.18449	0.435098	0.00648185
ENSGALG00000033780		10	1451.5	-1.18189	0.178156	3.26637e-11
ENSGALG00000011164		2	2245.25	-1.17867	0.285143	3.57096e-05
ENSGALG00000051365		6	101.738	-1.17847	0.280548	2.66203e-05
ENSGALG00000014699	MEGF10	Z	871.356	-1.17806	0.386468	0.00230158
ENSGALG00000016934		1	253.271	-1.17798	0.266018	9.50324e-06
ENSGALG00000019802	PHLDA3	26	12.873	-1.17733	0.745071	0.114072
ENSGALG00000053140		15	177.104	-1.17668	0.536816	0.0283826
ENSGALG00000053746		18	38.3142	-1.17445	0.714833	0.100387
ENSGALG00000009289	SLC18A2	6	802.052	-1.17432	0.266754	1.07119e-05
ENSGALG00000033671	FREM2	1	854.257	-1.17021	0.825139	0.156134
ENSGALG00000028638	CNP1	1	11.2146	-1.16884	0.665863	0.0791955
ENSGALG00000045036		4	134.925	-1.16858	0.23627	7.57748e-07
ENSGALG00000033626		2	2397.46	-1.16822	0.174857	2.3736e-11
ENSGALG00000014935	GREB1L	2	665.527	-1.16596	0.283594	3.93296e-05
ENSGALG00000046353		2	93.4592	-1.16395	0.42682	0.00639061
ENSGALG00000050503	TNFRSF4	21	271.579	-1.16327	0.282364	3.79281e-05
ENSGALG00000031843	ARHGAP18	3	2597.62	-1.16201	0.215517	6.97729e-08
ENSGALG00000054772	NAT8L	4	113.704	-1.16159	0.501191	0.0204675
ENSGALG00000034788	PHLDA1	1	341.455	-1.1591	0.236025	9.06406e-07
ENSGALG00000047259		1	22.3171	-1.15558	0.634898	0.0687428
ENSGALG00000052346		1	21.5822	-1.15544	0.717658	0.107395
ENSGALG00000030276	SHTN1	6	2356.42	-1.15538	0.17876	1.02424e-10
ENSGALG00000016522	PPEF1	1	60.3571	-1.15535	0.391396	0.00315871
ENSGALG00000038884	SRL	14	2997.46	-1.15437	0.203717	1.45718e-08
ENSGALG00000049372		2	4366.88	-1.15327	0.216988	1.06718e-07
ENSGALG00000034585	BFSP2	2	44.6871	-1.1515	0.426885	0.00698753
ENSGALG00000011284	LRRC7	8	277.808	-1.15115	0.437359	0.00848724
ENSGALG00000015490	FBXL4	3	265.815	-1.14838	0.332499	0.000552804
ENSGALG00000013149	MOCOS	2	137.641	-1.14719	0.269713	2.10578e-05
ENSGALG00000007484	GOT1	6	8199.2	-1.14594	0.217862	1.44105e-07
ENSGALG00000048337		6	831.932	-1.14531	0.380016	0.00257965
ENSGALG00000015089	GAP43	1	1022.77	-1.14376	0.340364	0.000778326
ENSGALG00000002186	UNC45B	19	13261.6	-1.143	0.223059	2.98837e-07
ENSGALG00000006217	S100B	7	13.4244	-1.14079	0.697444	0.101907
ENSGALG00000019157	SMPX	1	16569.9	-1.14078	0.192575	3.14567e-09
ENSGALG00000002125	TMOD1	Z	23318.9	-1.14035	0.177628	1.36382e-10
ENSGALG00000045218	MYO18B	15	4019.78	-1.13863	0.341053	0.000842071
ENSGALG00000030996		15	13.3665	-1.13745	0.844607	0.178071
ENSGALG00000025792	FRRS1L	2	1117.86	-1.13703	0.264539	1.72216e-05
ENSGALG00000037336	PRTG	10	377.898	-1.13688	0.400778	0.00455853
ENSGALG00000046869		9	11.8936	-1.13679	0.758121	0.133747
ENSGALG00000027397		2	263.975	-1.13648	0.220051	2.40953e-07
ENSGALG00000006637		4	193.04	-1.1359	0.255417	8.69814e-06
ENSGALG00000002759	PEAK1	10	3453.64	-1.13415	0.442032	0.0102947
ENSGALG00000047653		21	182.415	-1.13356	0.328364	0.000556119
ENSGALG00000009650		4	7351.7	-1.13308	0.266412	2.10835e-05
ENSGALG00000043754	GLUL	8	3707.77	-1.1329	0.213433	1.10842e-07
ENSGALG00000004840		15	18.1301	-1.13229	0.647814	0.0804889
ENSGALG00000052050		4	30.9225	-1.13023	0.664451	0.0889441
ENSGALG00000006670	PPP1R3C	6	860.297	-1.1302	0.192474	4.30655e-09
ENSGALG00000021542	SNCB	13	106.282	-1.12971	0.352008	0.0013304
ENSGALG00000054582		3	28.2514	-1.12896	0.544822	0.0382508
ENSGALG00000048859		1	18.7326	-1.12511	0.561893	0.0452467
ENSGALG00000012319		4	839.676	-1.12415	0.269252	2.97908e-05
ENSGALG00000016828	GRTP1	1	2215.04	-1.12302	0.207525	6.24971e-08
ENSGALG00000046293		5	22.8934	-1.12233	0.771865	0.145934
ENSGALG00000011007	OSBPL3	2	1711.91	-1.12061	0.31027	0.000304168
ENSGALG00000002549	RGS1	8	40.0095	-1.11932	0.444674	0.01183
ENSGALG00000006982	EEF2K	14	1267.52	-1.11912	0.202186	3.11019e-08
ENSGALG00000036502	CDIP1	14	591.585	-1.11128	0.225078	7.92061e-07
ENSGALG00000013143	PDE3A	1	1954.83	-1.10777	0.401849	0.00583901
ENSGALG00000032308	LRMDA	6	67.7311	-1.10754	0.330523	0.000805579
ENSGALG00000048800		2	10.2035	-1.10656	0.704742	0.116377
ENSGALG00000038238		4	347.022	-1.10534	0.195149	1.47791e-08
ENSGALG00000019718	KRT13	27	676.585	-1.10531	0.191921	8.45201e-09
ENSGALG00000009031	SESTD1	7	9140.51	-1.1044	0.193274	1.10239e-08
ENSGALG00000034146		1	36.93	-1.10411	0.434621	0.0110729
ENSGALG00000006025	XIRP1	2	14556.8	-1.10355	0.299261	0.000226376
ENSGALG00000030254	METAP1D	7	211.815	-1.10267	0.215941	3.28428e-07
ENSGALG00000004306	SYT12	5	136.277	-1.10102	0.337215	0.00109447
ENSGALG00000055026		6	1114.78	-1.10071	0.462253	0.0172571
ENSGALG00000010027	CFL2	5	18057.6	-1.09744	0.227627	1.42692e-06
ENSGALG00000032736	MGLL	12	2895.35	-1.09669	0.219419	5.78854e-07
ENSGALG00000009278	RBM46	4	236.814	-1.09432	0.309798	0.000411853
ENSGALG00000049578		5	59.612	-1.09416	0.427626	0.010507
ENSGALG00000052932	SHROOM3	4	1757.02	-1.09188	0.316033	0.000550383
ENSGALG00000052226		1	709.236	-1.08718	0.285424	0.000139533
ENSGALG00000037443	CRAT	17	1261.61	-1.08615	0.222654	1.07055e-06
ENSGALG00000048059		1	156.993	-1.08606	0.481778	0.0241792
ENSGALG00000048656		7	108.461	-1.08566	0.302828	0.000336991
ENSGALG00000041442		27	14.6047	-1.08519	0.62759	0.0837847
ENSGALG00000008231	PACSIN3	5	3099.31	-1.08452	0.191014	1.36516e-08
ENSGALG00000030303	PPP1R3B	4	4111.53	-1.08344	0.222028	1.06215e-06
ENSGALG00000027323	MYH1D	18	105003	-1.08275	0.364312	0.00295834
ENSGALG00000047503		1	15.8077	-1.08175	0.606482	0.0744812
ENSGALG00000010440	MKNK1	8	337.318	-1.08075	0.211789	3.34402e-07
ENSGALG00000035636	PHYH	1	956.562	-1.08026	0.174384	5.83814e-10
ENSGALG00000015142	DSG2	2	2509.07	-1.07893	0.268794	5.97108e-05
ENSGALG00000015937	FABP1	4	321.02	-1.0789	0.47475	0.0230523
ENSGALG00000006008	HOMER2	10	1401.18	-1.07782	0.204545	1.3691e-07
ENSGALG00000027778		5	649.273	-1.0759	0.215869	6.22669e-07
ENSGALG00000033510	ERBB3	33	2797.81	-1.07419	0.293578	0.000253231
ENSGALG00000010826	PRKAA2	8	1293.92	-1.07326	0.34676	0.00196743
ENSGALG00000042257	MYH1F	18	3094.31	-1.073	0.383228	0.00511164
ENSGALG00000007331	SVIL	2	42251	-1.07094	0.286852	0.000188881
ENSGALG00000015375	PLCXD2	1	138.113	-1.06943	0.618018	0.0835561
ENSGALG00000029197	KIRREL3	24	5617.78	-1.06882	0.216304	7.7612e-07
ENSGALG00000007080		13	139.581	-1.06672	0.386169	0.00573945
ENSGALG00000051830		8	50.1388	-1.0632	0.541867	0.0497491
ENSGALG00000020067	VASH2	3	1007.12	-1.06092	0.210019	4.38183e-07
ENSGALG00000046976		21	336.179	-1.05931	0.344826	0.0021262
ENSGALG00000011350	NEGR1	8	361.956	-1.0591	0.372773	0.00449518
ENSGALG00000038771	TECRL	4	39662.9	-1.05896	0.229626	3.99439e-06
ENSGALG00000009545	SLC25A12	7	4153.84	-1.05848	0.172603	8.65172e-10
ENSGALG00000010320	PAWR	1	861.904	-1.05764	0.197575	8.645e-08
ENSGALG00000002086	RASL10B	19	249.227	-1.05745	0.282512	0.000181817
ENSGALG00000001459	TNNC1	12	76690.7	-1.05724	0.229919	4.25949e-06
ENSGALG00000003726	EGFLAM	Z	4740.94	-1.05718	0.210809	5.30718e-07
ENSGALG00000020139	DTHD1	4	10.1223	-1.05623	0.793244	0.183016
ENSGALG00000032997	EMILIN2	2	7586.09	-1.05583	0.243463	1.44622e-05
ENSGALG00000032220	ELN	19	19199.8	-1.05559	0.718002	0.141513
ENSGALG00000032994	SOX17	2	49.3593	-1.0551	0.465369	0.0233765
ENSGALG00000054751		7	10.2317	-1.05414	0.7656	0.16855
ENSGALG00000013948	RASL11B	4	3275.85	-1.05355	0.175985	2.14262e-09
ENSGALG00000008047		5	26.2521	-1.05271	0.618477	0.0887378
ENSGALG00000015015	CYTL1	4	112.368	-1.05178	0.4572	0.0214206
ENSGALG00000046992	MCRIP2	14	3963.45	-1.05132	0.250043	2.61601e-05
ENSGALG00000006034	PITPNM3	19	677.564	-1.05111	0.331428	0.00151673
ENSGALG00000026446	CPLX3	10	48.7447	-1.04987	0.357446	0.00331241
ENSGALG00000041693		18	61.2754	-1.04877	0.404494	0.00952025
ENSGALG00000049089		3	11.145	-1.04793	0.682324	0.124581
ENSGALG00000001709	MUSTN1	12	52.1097	-1.04765	0.349375	0.00271179
ENSGALG00000002790	ABLIM3	13	933.328	-1.04737	0.244337	1.81452e-05
ENSGALG00000003076	FASLG	8	16.2748	-1.04627	0.579495	0.071
ENSGALG00000016415	MAP7D2	1	144.58	-1.04614	0.290346	0.000314486
ENSGALG00000012377	HNMT	7	1414.09	-1.04526	0.319263	0.00106043
ENSGALG00000049504		31	43.855	-1.04523	0.378333	0.00573227
ENSGALG00000051180		2	12.7744	-1.04481	0.631097	0.0978127
ENSGALG00000041373	ARAP2	4	435.821	-1.04421	0.443524	0.0185555
ENSGALG00000014463	ACTN2	3	39529.5	-1.04412	0.255837	4.48037e-05
ENSGALG00000019261	ARHGAP8	1	223.321	-1.03888	0.280315	0.000210471
ENSGALG00000033311		4	51.9552	-1.03819	0.366611	0.00462776
ENSGALG00000001828		19	358.001	-1.03496	0.268525	0.000116088
ENSGALG00000016313	GCLC	3	1706.14	-1.0333	0.216445	1.80655e-06
ENSGALG00000048973		2	122.339	-1.03283	0.297418	0.000515364
ENSGALG00000047526		5	19.2692	-1.03248	0.550855	0.0608859
ENSGALG00000053577		8	15.9618	-1.03078	0.698218	0.139865
ENSGALG00000005670	SLMAP	12	6175.72	-1.02953	0.206361	6.0689e-07
ENSGALG00000031142	ACAA2	Z	7383.2	-1.02931	0.180043	1.0842e-08
ENSGALG00000048316		15	27.575	-1.02856	0.544872	0.0590651
ENSGALG00000037829	LOXHD1	Z	70.4487	-1.02746	0.424078	0.0154006
ENSGALG00000009378	PDGFC	4	960.763	-1.02557	0.230032	8.25747e-06
ENSGALG00000017308	CHRDL2	1	18.6067	-1.02547	0.564504	0.0692809
ENSGALG00000000364	STC1	22	54.5266	-1.02536	0.456516	0.0247005
ENSGALG00000015410	BVES	3	11444.7	-1.02531	0.159054	1.14607e-10
ENSGALG00000000234	EPB41L4A	Z	261.382	-1.02507	0.252764	5.00345e-05
ENSGALG00000013155		2	1567.2	-1.02473	0.207584	7.95541e-07
ENSGALG00000011175	TMEM150C	4	754.578	-1.02385	0.170952	2.10994e-09
ENSGALG00000013999	FBXO40	1	289.005	-1.02357	0.291333	0.000442392
ENSGALG00000031590	B3GAT2	3	266.855	-1.02315	0.472531	0.0303684
ENSGALG00000006300	LDHA	5	9484.47	-1.02253	0.203832	5.2611e-07
ENSGALG00000028301		18	683.602	-1.02165	0.30975	0.000972705
ENSGALG00000035052	BMP3	4	601.72	-1.0213	0.332576	0.00213437
ENSGALG00000042392		13	22.5499	-1.02124	0.676135	0.130938
ENSGALG00000026081	RBM38	20	7318.21	-1.02104	0.274542	0.00019996
ENSGALG00000010010	RHOQ	3	709.042	-1.02054	0.214761	2.01417e-06
ENSGALG00000014042	SSPN	1	7189.14	-1.0194	0.180001	1.48469e-08
ENSGALG00000006292		2	3167.47	-1.01891	0.199626	3.32348e-07
ENSGALG00000034346	RDH10	2	10236.5	-1.01823	0.185072	3.75951e-08
ENSGALG00000005854	CLUH	19	4854.83	-1.01721	0.151527	1.90565e-11
ENSGALG00000016651		3	2743.52	-1.01612	0.368685	0.00584993
ENSGALG00000042150		7	12.0786	-1.01566	0.649591	0.117926
ENSGALG00000035099	LRRN1	12	7570	-1.01292	0.371739	0.00643371
ENSGALG00000000394	SLC6A17	26	817.085	-1.01291	0.353024	0.00411472
ENSGALG00000015343	RTN4IP1	3	1248.35	-1.01098	0.242295	3.01261e-05
ENSGALG00000046262		15	14.4088	-1.00982	0.766457	0.187667
ENSGALG00000008902	GIPC2	8	183.679	-1.00844	0.322445	0.00176308
ENSGALG00000033883	PCDH7	4	692.344	-1.00747	0.492049	0.0406085
ENSGALG00000047756		KZ626838.1	53.6718	-1.00719	0.483795	0.037356
ENSGALG00000054960		5	12.4082	-1.00709	0.64342	0.117534
ENSGALG00000001797	GPSM1	17	414.409	-1.00425	0.270167	0.000201477
ENSGALG00000030466	CS	33	11909.4	-1.00357	0.256381	9.06351e-05
ENSGALG00000015783	IMMT	4	12436.4	-1.0033	0.181877	3.46104e-08
ENSGALG00000009845	GJD2	5	346.208	-1.00307	0.327394	0.00218548
ENSGALG00000054287		1	328.235	-1.00271	0.248291	5.38027e-05
ENSGALG00000041996		3	1848.62	-1.00155	0.204957	1.02573e-06
ENSGALG00000006969	USP28	24	6288.74	-1.00138	0.175723	1.20783e-08
ENSGALG00000015258	DCBLD2	1	10857.3	-0.999908	0.210784	2.09797e-06
ENSGALG00000000806	LINGO3	28	656.198	-0.999858	0.17969	2.63109e-08
ENSGALG00000031244	ADCY6	7	2093.59	-0.999835	0.391068	0.0105677
ENSGALG00000029917	SGCA	27	198.513	-0.996876	0.304139	0.00104657
ENSGALG00000015626		4	862.974	-0.993885	0.280095	0.000387601
ENSGALG00000012992	WNK1	1	8582.63	-0.992775	0.771388	0.198095
ENSGALG00000000164	MYBPHL	26	665.816	-0.992614	0.266604	0.000196733
ENSGALG00000041565		5	109.527	-0.992045	0.338403	0.00337271
ENSGALG00000017242	FZD4	1	3611.26	-0.991462	0.302245	0.00103689
ENSGALG00000041419		12	5562.19	-0.9895	0.218095	5.70548e-06
ENSGALG00000053272		1	80.775	-0.987086	0.385744	0.0104999
ENSGALG00000016872	PCCA	1	2517.62	-0.985742	0.166991	3.57067e-09
ENSGALG00000050012		Z	14.3308	-0.984141	0.741253	0.184286
ENSGALG00000046580	MGARP	4	326.399	-0.982948	0.352466	0.00529084
ENSGALG00000049697		1	35.7063	-0.981692	0.462274	0.0337021
ENSGALG00000005675		9	2203.6	-0.981636	0.220731	8.69974e-06
ENSGALG00000006707	NOX1	4	36.2052	-0.979557	0.425813	0.0214232
ENSGALG00000001605	PPM1J	26	317.662	-0.979144	0.210259	3.21102e-06
ENSGALG00000041644	ATP11A	1	2992.86	-0.978417	0.305673	0.00137016
ENSGALG00000009725	SCG5	5	56.9709	-0.97824	0.323768	0.00251594
ENSGALG00000028081	ONECUT3	28	14.4524	-0.976742	0.62566	0.118491
ENSGALG00000048362		1	10.6457	-0.976345	0.680231	0.151198
ENSGALG00000016518	PHKA2	1	1728.21	-0.975089	0.194009	5.00808e-07
ENSGALG00000003921	DBNDD2	20	1556.94	-0.974159	0.171312	1.29696e-08
ENSGALG00000006854	NEURL2	20	237.704	-0.973974	0.256943	0.000150273
ENSGALG00000003837	ADCY7	11	169.72	-0.973466	0.357811	0.00651604
ENSGALG00000048144		8	3250.43	-0.973339	0.185422	1.52674e-07
ENSGALG00000035086	MYL6	33	48094.5	-0.972016	0.261971	0.000206939
ENSGALG00000051676	INA	6	10.7706	-0.971975	0.703066	0.166824
ENSGALG00000054937		13	286.443	-0.971587	0.543858	0.0740226
ENSGALG00000012244	KLHDC2	5	5435.02	-0.970437	0.169139	9.60785e-09
ENSGALG00000010938	KLHL7	2	8041.01	-0.968307	0.195032	6.87532e-07
ENSGALG00000013535	CYP4V2	4	121.199	-0.965811	0.336543	0.00410738
ENSGALG00000013235	PDK1	7	3739.74	-0.96531	0.171654	1.8705e-08
ENSGALG00000037401	IDH3A	10	5454.29	-0.964887	0.185918	2.10473e-07
ENSGALG00000035685		MT	100.492	-0.964658	0.610784	0.11425
ENSGALG00000016164	ABCG1	1	237.665	-0.961959	0.247319	0.000100432
ENSGALG00000054657		17	32.4645	-0.961519	0.509856	0.0593133
ENSGALG00000047638		28	29.6778	-0.958974	0.446658	0.0317934
ENSGALG00000016646		3	32.3394	-0.958926	0.619207	0.12147
ENSGALG00000021357		20	22.0121	-0.958875	0.514605	0.0624168
ENSGALG00000017418	NPTX1	18	34.2312	-0.958793	0.437406	0.0283798
ENSGALG00000052912		1	22.2281	-0.958501	0.489036	0.0499982
ENSGALG00000036133	KLF15	12	365.417	-0.95668	0.306057	0.00177309
ENSGALG00000016655	GYG2	1	197.985	-0.956462	0.242055	7.76875e-05
ENSGALG00000010005	EPAS1	3	2379.88	-0.955495	0.272242	0.00044856
ENSGALG00000011855	RHOJ	5	795.084	-0.95543	0.353128	0.00681771
ENSGALG00000026687	PLCD4	7	112.566	-0.954724	0.259176	0.000229888
ENSGALG00000008735	BFSP1	3	13.2637	-0.954464	0.671034	0.154917
ENSGALG00000045029		8	136.59	-0.954346	0.310501	0.00211514
ENSGALG00000005493	ITGB1BP2	4	2055.78	-0.953614	0.320432	0.0029201
ENSGALG00000025751	NMRK2	28	1756.31	-0.953487	0.281031	0.000691775
ENSGALG00000047047		5	14.0881	-0.951122	0.642011	0.13848
ENSGALG00000000208	MCC	Z	2132.07	-0.950563	0.224331	2.26192e-05
ENSGALG00000016309	KLHL31	3	4929.8	-0.949603	0.260022	0.000260198
ENSGALG00000006219	PRKAG2	2	3334.85	-0.949547	0.217553	1.27315e-05
ENSGALG00000041327	TRIM55	2	17507.6	-0.948869	0.17436	5.26837e-08
ENSGALG00000041830		3	27.7441	-0.947345	0.719968	0.188236
ENSGALG00000047292		11	103.113	-0.947164	0.267115	0.00039127
ENSGALG00000005551	DKK3	5	9405.27	-0.946974	0.202358	2.87304e-06
ENSGALG00000037506	SIPA1L2	3	3353.15	-0.944921	0.382659	0.0135356
ENSGALG00000041456	SLC35G1	6	36.4139	-0.943222	0.462761	0.0415252
ENSGALG00000009567	TLL1	4	440.533	-0.943219	0.313634	0.00263506
ENSGALG00000012612	FBP2	Z	136.623	-0.943207	0.298829	0.00159758
ENSGALG00000009172	OSBPL6	7	590.283	-0.942054	0.218443	1.61359e-05
ENSGALG00000009901	DYRK2	1	2401.42	-0.940949	0.261863	0.000326534
ENSGALG00000026077	ALDOC	19	23747.6	-0.939994	0.239832	8.87742e-05
ENSGALG00000040541	SLC5A6	3	1114.33	-0.939565	0.191041	8.73724e-07
ENSGALG00000005207	SYNPO2L	6	8477.37	-0.939228	0.2099	7.65406e-06
ENSGALG00000009826	CLGN	4	1077.44	-0.937853	0.225348	3.15756e-05
ENSGALG00000025906	HS6ST3	1	179.703	-0.936939	0.31163	0.00264213
ENSGALG00000007320	FXYD2	24	68.2271	-0.936314	0.422844	0.0268065
ENSGALG00000048670	gga-mir-12271	4	12.9115	-0.936301	0.678285	0.167465
ENSGALG00000004889	SLC2A1	21	5097.71	-0.935432	0.226107	3.51699e-05
ENSGALG00000051260		30	1603.45	-0.933261	0.272275	0.000608833
ENSGALG00000010942	NUP42	2	828.343	-0.929615	0.204814	5.65702e-06
ENSGALG00000007158	SOCS1	14	396.376	-0.928845	0.204328	5.47142e-06
ENSGALG00000012894	CHRM2	1	1826.44	-0.928841	0.316123	0.00330099
ENSGALG00000005046	SHMT1	14	707.733	-0.928498	0.204364	5.53692e-06
ENSGALG00000027353	C10orf71	6	728.949	-0.92611	0.313943	0.00317843
ENSGALG00000035325	PMAIP1	Z	36.6575	-0.925694	0.3808	0.0150605
ENSGALG00000038639	AGBL5	3	955.708	-0.925575	0.187697	8.17187e-07
ENSGALG00000016185	SLC37A1	1	997.737	-0.925274	0.220091	2.62181e-05
ENSGALG00000017163	ACAT1	1	11480.6	-0.924916	0.202174	4.76545e-06
ENSGALG00000030706	MAP3K6	23	277.503	-0.924546	0.239898	0.000116248
ENSGALG00000023844		20	60.944	-0.921666	0.371502	0.0131045
ENSGALG00000012888	PHLPP1	2	2708.55	-0.919603	0.307917	0.00282167
ENSGALG00000034218		33	13312.4	-0.919175	0.21509	1.9247e-05
ENSGALG00000033816	KCTD12	1	895.825	-0.918998	0.248422	0.000216154
ENSGALG00000002121	PLEKHN1	21	125.758	-0.918251	0.285757	0.00131176
ENSGALG00000053645		5	52.3206	-0.917978	0.381405	0.0160914
ENSGALG00000051692		3	23.168	-0.917953	0.482103	0.0569024
ENSGALG00000007904	DLAT	24	4612.56	-0.917058	0.165643	3.08862e-08
ENSGALG00000008591	CACNB2	2	1540.23	-0.9152	0.352493	0.0094215
ENSGALG00000002203	FGF18	13	458.322	-0.912488	0.219683	3.27192e-05
ENSGALG00000023172		4	108.715	-0.912102	0.379787	0.016323
ENSGALG00000005861		14	57.2219	-0.910928	0.376388	0.0155127
ENSGALG00000043584		3	586.491	-0.910636	0.46314	0.0492731
ENSGALG00000003163	GNAO1	11	580.872	-0.908542	0.200063	5.59153e-06
ENSGALG00000004504		14	109.482	-0.908289	0.415631	0.0288649
ENSGALG00000043118	ATP10A	1	706.6	-0.907827	0.247051	0.000238176
ENSGALG00000035369		27	2277.52	-0.907289	0.169327	8.40488e-08
ENSGALG00000011185	PLEKHA8	2	1114.07	-0.906874	0.181906	6.18372e-07
ENSGALG00000011950	ACO2	1	25402.9	-0.904674	0.162934	2.81795e-08
ENSGALG00000036678	ETV4	27	755.684	-0.903573	0.197498	4.76005e-06
ENSGALG00000011020	CYCS	2	15029.9	-0.903085	0.24164	0.000185995
ENSGALG00000016925	TBC1D4	1	1441.6	-0.902899	0.213936	2.43858e-05
ENSGALG00000026405	gga-mir-6712	17	17.1461	-0.902468	0.619459	0.145154
ENSGALG00000041775	ESRRB	5	67.0576	-0.902061	0.385303	0.0192232
ENSGALG00000037671		1	62.5237	-0.899714	0.336919	0.00757575
ENSGALG00000015338	QRSL1	3	1058.45	-0.899495	0.207272	1.42693e-05
ENSGALG00000047364		30	17.913	-0.899371	0.692904	0.194296
ENSGALG00000014192	ATP10D	4	1663.74	-0.898272	0.323423	0.00547972
ENSGALG00000009645	ESRRG	3	1267.25	-0.897906	0.261485	0.000595018
ENSGALG00000013167	SDHA	2	10524.6	-0.897755	0.189709	2.22006e-06
ENSGALG00000007912	ATP9A	20	536.701	-0.897568	0.386135	0.0200991
ENSGALG00000011661	SOD2	3	6950.83	-0.897514	0.201338	8.28205e-06
ENSGALG00000013138	TMEM245	2	1600.61	-0.895648	0.340903	0.00860711
ENSGALG00000028949	CORO6	19	1262.88	-0.894128	0.181411	8.27549e-07
ENSGALG00000041873	MFN1	9	6422.34	-0.893915	0.194959	4.53656e-06
ENSGALG00000053254	EHHADH	9	1807.53	-0.892973	0.144504	6.42752e-10
ENSGALG00000010237	NPC2	5	3298.35	-0.892442	0.181179	8.40387e-07
ENSGALG00000040710		4	12.3882	-0.892226	0.662964	0.178363
ENSGALG00000000549	URAH	11	13.1187	-0.891353	0.651415	0.171208
ENSGALG00000051449		5	38.0875	-0.890178	0.435311	0.0408621
ENSGALG00000036743	MGAT3	1	1675.45	-0.887654	0.282022	0.00164692
ENSGALG00000035818		33	231.12	-0.887444	0.307174	0.00386393
ENSGALG00000041255	ADAM12	6	3729.4	-0.886846	0.208077	2.02504e-05
ENSGALG00000029083	NXPH2	7	718.404	-0.886134	0.244114	0.000283423
ENSGALG00000003657	UNC119	19	278.104	-0.885261	0.219789	5.63052e-05
ENSGALG00000038745	LACTB2	2	2521.02	-0.884367	0.188996	2.87879e-06
ENSGALG00000015147	ALDH1A1	Z	33.3178	-0.883755	0.65572	0.177735
ENSGALG00000005580	TMEM56	8	760.547	-0.88358	0.286788	0.00206342
ENSGALG00000009095	LHCGR	3	106.294	-0.882206	0.403743	0.0288836
ENSGALG00000010858	LRP2	7	1409.02	-0.881911	0.470028	0.0606148
ENSGALG00000000302	TNNT2	26	181139	-0.881836	0.190811	3.8097e-06
ENSGALG00000047910		2	2453.62	-0.880083	0.233493	0.000163773
ENSGALG00000039977	MYH1B	18	740.146	-0.87788	0.413497	0.0337487
ENSGALG00000028326	HSD11B2	11	36.5558	-0.877715	0.421636	0.0373712
ENSGALG00000014869	NNT	Z	9679.58	-0.874879	0.222025	8.13275e-05
ENSGALG00000003470	ZMAT4	22	375.392	-0.874715	0.202299	1.53313e-05
ENSGALG00000033512	CPEB4	13	1004.29	-0.874649	0.291404	0.00268656
ENSGALG00000003123	CNTNAP1	27	667.706	-0.873112	0.264859	0.000978921
ENSGALG00000001975	TMEM120A	19	1065.12	-0.872902	0.171448	3.55511e-07
ENSGALG00000047605		3	280.145	-0.87129	0.533065	0.102156
ENSGALG00000049848	CNR1	3	1774.01	-0.869438	0.270342	0.0012996
ENSGALG00000013090	LOXL4	6	67.6192	-0.868637	0.375486	0.0207026
ENSGALG00000052931	FOXL3	14	35.6626	-0.867546	0.502568	0.0843066
ENSGALG00000054949		5	38.8373	-0.864509	0.538962	0.108708
ENSGALG00000046299	CNKSR1	23	130.326	-0.86415	0.236719	0.000261697
ENSGALG00000021848		Z	179.585	-0.863981	0.307516	0.00496109
ENSGALG00000007668	BMP7	20	3836.91	-0.862156	0.26459	0.00112017
ENSGALG00000050631		14	758.096	-0.861848	0.424161	0.0421651
ENSGALG00000011865	SMTN	15	4340.35	-0.858073	0.155777	3.62196e-08
ENSGALG00000049379		1	1035.07	-0.857477	0.307444	0.00528631
ENSGALG00000010288		3	37.3988	-0.857019	0.460442	0.0627025
ENSGALG00000003059	HLF	18	707.964	-0.856989	0.188702	5.58547e-06
ENSGALG00000029863	PHYHIPL	6	93.9783	-0.856931	0.279756	0.00219031
ENSGALG00000035389		9	20.1215	-0.856034	0.539809	0.112783
ENSGALG00000035930	PHACTR3	20	369.06	-0.854941	0.222707	0.000123611
ENSGALG00000003135	ANK3	6	12070.1	-0.854682	0.336348	0.0110515
ENSGALG00000029095	PDZD8	6	2146.46	-0.854351	0.205636	3.25735e-05
ENSGALG00000051402		Z	17.028	-0.854012	0.55503	0.123883
ENSGALG00000019228	SFT2D2	1	1175.83	-0.854008	0.206978	3.68982e-05
ENSGALG00000038087	CACNG3	14	104.613	-0.85342	0.273137	0.001781
ENSGALG00000036490	CYRIB	2	3350.02	-0.852598	0.169235	4.70539e-07
ENSGALG00000014124	TEC	4	673.158	-0.852102	0.238411	0.000351444
ENSGALG00000011639		5	1981.52	-0.851825	0.3631	0.0189771
ENSGALG00000030792		19	218.513	-0.851204	0.241064	0.000413953
ENSGALG00000013091	EPS8	1	2299.54	-0.851116	0.15523	4.18368e-08
ENSGALG00000016098	EXOC6B	4	1798.41	-0.850889	0.314771	0.00686764
ENSGALG00000022891		1	1695.51	-0.850833	0.244814	0.000510053
ENSGALG00000002321	GOT2	11	5220.67	-0.850038	0.245114	0.000524495
ENSGALG00000001995	LIMS2	9	2649.94	-0.84971	0.153675	3.21546e-08
ENSGALG00000015779	PM20D2	3	1046.38	-0.849669	0.208577	4.62845e-05
ENSGALG00000054028		3	201.671	-0.848326	0.576495	0.141149
ENSGALG00000008007	ITGA11	10	904.128	-0.847723	0.390922	0.0301192
ENSGALG00000041922		MT	61.5446	-0.845788	0.391851	0.0308936
ENSGALG00000005888	PGP	14	1457.54	-0.844645	0.172267	9.4336e-07
ENSGALG00000007334	ABAT	14	1152.21	-0.844505	0.187546	6.70292e-06
ENSGALG00000036956		MT	41957.9	-0.843393	0.439392	0.0549271
ENSGALG00000029819	SCG2	9	882.445	-0.842085	0.237115	0.000383209
ENSGALG00000016456	LPIN1	3	427.334	-0.84206	0.202675	3.25669e-05
ENSGALG00000005575	AKAP1	19	6845.58	-0.841625	0.225704	0.000192332
ENSGALG00000015109	TJP2	Z	4365.84	-0.841146	0.183412	4.516e-06
ENSGALG00000012944	DENND5B	1	2765.68	-0.840683	0.343278	0.0143259
ENSGALG00000008253	TBX5	15	13332.7	-0.839762	0.223157	0.000167814
ENSGALG00000010234	MMACHC	8	224.541	-0.839378	0.196268	1.89686e-05
ENSGALG00000011369	LHX8	8	31.9587	-0.839209	0.575033	0.144452
ENSGALG00000005721	DGKG	9	149.506	-0.839061	0.358602	0.0192936
ENSGALG00000037400		14	108.72	-0.839054	0.342662	0.0143397
ENSGALG00000005367	MRPS22	9	2140.83	-0.838347	0.227911	0.000234703
ENSGALG00000050133		1	475.999	-0.838277	0.391254	0.0321501
ENSGALG00000014846	OXCT1	Z	24270.3	-0.838115	0.171143	9.72261e-07
ENSGALG00000003161	GDF3	28	1408.46	-0.83782	0.228586	0.00024711
ENSGALG00000012211	PDLIM5	4	7008.88	-0.836892	0.197159	2.18835e-05
ENSGALG00000009067	GPR50	4	111.472	-0.836631	0.317949	0.00850499
ENSGALG00000009369	PRDX3	6	8751.61	-0.836183	0.276629	0.00250478
ENSGALG00000023772	HSPB7	21	356.378	-0.835812	0.218917	0.000134571
ENSGALG00000003026		14	3544.72	-0.835641	0.3975	0.035532
ENSGALG00000041470	PPARA	1	360.046	-0.835534	0.254927	0.00104712
ENSGALG00000048754		23	232.377	-0.83504	0.212203	8.31636e-05
ENSGALG00000040573	FMO3	8	251.979	-0.834893	0.483289	0.0840735
ENSGALG00000008945	NEXN	8	27733.7	-0.834489	0.195398	1.94847e-05
ENSGALG00000000313	TNNI1	26	55706.7	-0.834391	0.221442	0.000164562
ENSGALG00000052222		1	65.7529	-0.833655	0.411094	0.0425713
ENSGALG00000051838		1	571.781	-0.832494	0.2391	0.000498085
ENSGALG00000014678	ELL2	Z	195.275	-0.830083	0.258192	0.00130453
ENSGALG00000033753	PDHX	5	2271.96	-0.828999	0.242984	0.000645477
ENSGALG00000034756		23	66.8815	-0.828723	0.362291	0.0221694
ENSGALG00000052717		15	66.4186	-0.828311	0.445638	0.0630688
ENSGALG00000008911	RNF208	17	948.675	-0.827596	0.226697	0.000261558
ENSGALG00000055135		23	104.614	-0.82751	0.389594	0.0336675
ENSGALG00000011342	FGD6	1	2548.02	-0.825571	0.371487	0.0262604
ENSGALG00000003816	NT5C1A	23	689.647	-0.82386	0.16963	1.19293e-06
ENSGALG00000053336		5	4057.38	-0.823825	0.24965	0.000967108
ENSGALG00000053607		1	16.5273	-0.822854	0.58249	0.157759
ENSGALG00000002204	SLC7A4	15	97.3651	-0.820961	0.273877	0.00272154
ENSGALG00000051535		13	21.4651	-0.820917	0.540189	0.12859
ENSGALG00000039951	TRAP1	14	7378.98	-0.820715	0.147009	2.36731e-08
ENSGALG00000043373	ARVCF	15	6145.68	-0.820458	0.301032	0.0064207
ENSGALG00000040842	HSPB2	24	2046.42	-0.820426	0.189993	1.5732e-05
ENSGALG00000029020	PLPP4	6	242.845	-0.817768	0.239219	0.000629705
ENSGALG00000050394		4	80.1767	-0.817123	0.324423	0.0117791
ENSGALG00000050535		5	35.2078	-0.816911	0.555658	0.141516
ENSGALG00000013037	BCL2L13	1	2886.57	-0.816598	0.182987	8.09717e-06
ENSGALG00000004936		4	45.5254	-0.815136	0.401801	0.0424884
ENSGALG00000011299	KIF25	3	350.779	-0.814981	0.191951	2.17831e-05
ENSGALG00000054982		1	1423.62	-0.813744	0.232391	0.00046245
ENSGALG00000033760	PTGES2	17	4662.77	-0.813401	0.166253	9.95321e-07
ENSGALG00000001343	LAMB3	26	916.574	-0.813379	0.452664	0.0723558
ENSGALG00000032544	ALDH5A1	2	4563.09	-0.81332	0.206304	8.06914e-05
ENSGALG00000006755	USP2	24	2025.48	-0.813217	0.220423	0.000224829
ENSGALG00000010386	DLK2	3	109.579	-0.812592	0.306679	0.00805746
ENSGALG00000030703	CYBRD1	7	177.394	-0.812246	0.280765	0.00381608
ENSGALG00000041401	SDHB	21	5478.61	-0.811591	0.201049	5.41901e-05
ENSGALG00000007594	ASB12	4	3924.41	-0.811315	0.188044	1.59961e-05
ENSGALG00000053100	FITM2	20	1285.09	-0.809531	0.194734	3.22282e-05
ENSGALG00000033328	PACS2	8	2420.71	-0.809242	0.224783	0.000318097
ENSGALG00000010793	SLC24A4	5	49.9763	-0.808167	0.532124	0.128824
ENSGALG00000016251		1	6009.13	-0.807905	0.171722	2.54197e-06
ENSGALG00000008420		12	1734.47	-0.807784	0.203469	7.18572e-05
ENSGALG00000001130	GALNT17	19	3121.25	-0.80764	0.29615	0.00638884
ENSGALG00000011242	OBSL1	7	8444.17	-0.806557	0.414967	0.0519357
ENSGALG00000001330	ATP5MC1	27	18259	-0.804991	0.180272	7.99121e-06
ENSGALG00000028135		Z	377.174	-0.804612	0.210301	0.000130237
ENSGALG00000014847	MYOM1	2	30990.1	-0.804054	0.418061	0.0544434
ENSGALG00000007606	PGAM1	6	25511.1	-0.80379	0.212293	0.000152948
ENSGALG00000001856	MOB3B	Z	30.5177	-0.803498	0.466397	0.0849285
ENSGALG00000006672	LARP4B	2	7808.18	-0.803254	0.438001	0.0666672
ENSGALG00000014855	GHR	Z	1623.98	-0.803178	0.228768	0.00044661
ENSGALG00000005438	PARVA	5	1097.14	-0.802726	0.226143	0.000385757
ENSGALG00000022733	ARL11	1	115.93	-0.801315	0.26605	0.00259627
ENSGALG00000017154	ZC3H12C	1	361.153	-0.801175	0.372825	0.0316401
ENSGALG00000013780	AIG1	3	982.089	-0.800142	0.191632	2.97446e-05
ENSGALG00000027232	C1QTNF2	13	629.432	-0.799876	0.29808	0.00728729
ENSGALG00000030775	HIGD1C	2	1649.25	-0.798354	0.291015	0.00608165
ENSGALG00000000997	GJC3	27	1178.18	-0.797789	0.180701	1.01021e-05
ENSGALG00000002891	ACADL	7	12243	-0.797587	0.171516	3.31568e-06
ENSGALG00000016993	SUCLA2	1	7630.82	-0.797216	0.202633	8.34445e-05
ENSGALG00000003674	DHTKD1	1	1818.13	-0.796652	0.169142	2.47763e-06
ENSGALG00000013756	ZC2HC1B	3	144.696	-0.796288	0.338238	0.0185614
ENSGALG00000003713		21	37.1178	-0.795299	0.418182	0.0571972
ENSGALG00000006837	TSPAN4	5	4961.91	-0.795213	0.309518	0.0101933
ENSGALG00000008603	ITPKA	5	1056.94	-0.795138	0.171197	3.40761e-06
ENSGALG00000008552	MAL	3	39.6684	-0.794934	0.534393	0.136871
ENSGALG00000002769	DNAJC12	6	2563.87	-0.794715	0.178113	8.12499e-06
ENSGALG00000006069	SMTNL2	19	759.128	-0.793258	0.279325	0.00451261
ENSGALG00000008606	NDUFS1	7	14923.8	-0.793109	0.150668	1.41001e-07
ENSGALG00000008434	SORCS3	6	1227.19	-0.790825	0.477569	0.0977344
ENSGALG00000038574		18	104.833	-0.790238	0.329561	0.0164917
ENSGALG00000051385		5	72.3341	-0.789879	0.356001	0.0265036
ENSGALG00000006016	PASK	9	811.138	-0.789765	0.168329	2.70814e-06
ENSGALG00000037880	ATP5A1Z	Z	40682.7	-0.789646	0.211784	0.000192593
ENSGALG00000046375	SULT6B1	3	54.4022	-0.789356	0.405992	0.0518632
ENSGALG00000053667		1	784.139	-0.788106	0.335075	0.0186714
ENSGALG00000007378	FAM162A	1	2831.56	-0.788102	0.225904	0.000485439
ENSGALG00000038964		9	30.3409	-0.787814	0.445095	0.0767286
ENSGALG00000005226	MYOZ1	6	176.954	-0.787387	0.40911	0.0542751
ENSGALG00000027565		8	213.503	-0.785925	0.302713	0.00942409
ENSGALG00000037479	IGSF21	21	378.46	-0.785922	0.219872	0.000350962
ENSGALG00000002804	RND2	27	619.408	-0.78542	0.240175	0.00107472
ENSGALG00000039878	TFEB	26	1791.27	-0.785242	0.21383	0.0002404
ENSGALG00000002223	LHX9	8	663.079	-0.785021	0.278037	0.00475105
ENSGALG00000054877		15	97.741	-0.784823	0.532768	0.140722
ENSGALG00000053846		1	1407.29	-0.784785	0.375293	0.036517
ENSGALG00000001949	MDH2	19	15527.1	-0.784715	0.203657	0.000116617
ENSGALG00000037558		28	239.383	-0.783957	0.271725	0.00391274
ENSGALG00000001620		17	30.5523	-0.783857	0.448921	0.0807954
ENSGALG00000030442	FOXC1	2	525.561	-0.783809	0.258852	0.00246164
ENSGALG00000004272	ASB1	7	623.817	-0.782877	0.20227	0.000108633
ENSGALG00000005789	UQCRC1	12	15315.4	-0.78247	0.16974	4.03026e-06
ENSGALG00000007559	PDSS1	2	1674.08	-0.78106	0.218352	0.000347462
ENSGALG00000039523	MRM1	19	656.841	-0.780883	0.218721	0.000356682
ENSGALG00000026698	FEV	7	19.5992	-0.780784	0.51565	0.129981
ENSGALG00000009995	AKAP6	5	1454.24	-0.780778	0.338166	0.0209515
ENSGALG00000000674	MYO1D	27	2221.82	-0.780541	0.242348	0.00127857
ENSGALG00000008999	AFAP1L2	6	1157.73	-0.779922	0.182121	1.84863e-05
ENSGALG00000035836	LDHB	1	44099.2	-0.779676	0.155766	5.57358e-07
ENSGALG00000016285		1	532.381	-0.77791	0.231804	0.000791083
ENSGALG00000033102	LRRFIP2	2	5542.8	-0.777892	0.247603	0.00167973
ENSGALG00000012462	KIF5C	7	1703.15	-0.777478	0.235066	0.000941366
ENSGALG00000043352		28	1265.91	-0.777289	0.153356	4.00879e-07
ENSGALG00000002925	ETFA	10	10643.3	-0.776893	0.205063	0.000151524
ENSGALG00000049502		2	20.9935	-0.776741	0.562544	0.167351
ENSGALG00000048601		4	86.8282	-0.776481	0.570018	0.173133
ENSGALG00000026971	RRAGD	3	5462.99	-0.775535	0.193745	6.2578e-05
ENSGALG00000042679	RETREG1	2	233.605	-0.775481	0.363021	0.032664
ENSGALG00000003349	PLEKHA2	22	350.084	-0.775187	0.180172	1.68891e-05
ENSGALG00000007072	ACADS	15	3931.59	-0.774527	0.142169	5.09562e-08
ENSGALG00000039257	CYP4F11	30	119.659	-0.773415	0.290175	0.00769106
ENSGALG00000010853	C8B	8	77.4517	-0.771568	0.534209	0.14865
ENSGALG00000013887	FAM210A	2	1984.76	-0.77117	0.17585	1.15784e-05
ENSGALG00000016281	DMD	1	8217.93	-0.770164	0.309406	0.0128043
ENSGALG00000003160	CERS1	28	1015.06	-0.768632	0.227647	0.000734357
ENSGALG00000016580	SCARA5	3	398.049	-0.76846	0.276732	0.00548788
ENSGALG00000052512	NPS	6	26.2233	-0.768339	0.500215	0.124534
ENSGALG00000008084	NDUFS3	5	6177.79	-0.768118	0.236544	0.00116528
ENSGALG00000008321	RNPEPL1	9	742.127	-0.768006	0.245371	0.00174817
ENSGALG00000009568	SPOCK3	4	899.266	-0.76787	0.157744	1.12827e-06
ENSGALG00000009945	CPM	1	405.146	-0.767628	0.306001	0.0121218
ENSGALG00000012639	MTERF2	1	184.401	-0.76743	0.224358	0.000624945
ENSGALG00000000883	MAPKAPK2	26	5148.73	-0.767356	0.212291	0.000300764
ENSGALG00000030988	RBPMS2	10	10047	-0.767105	0.175923	1.29786e-05
ENSGALG00000052274		2	126.441	-0.766231	0.4698	0.102896
ENSGALG00000005522	DYNLL2	19	4018.1	-0.766129	0.174366	1.1139e-05
ENSGALG00000047838		KZ626836.1	157.053	-0.766118	0.358478	0.0325864
ENSGALG00000002099		12	1883.86	-0.766	0.239898	0.00140789
ENSGALG00000053940		17	1472.9	-0.765883	0.380379	0.0440648
ENSGALG00000012570	TANC1	7	6658.57	-0.765699	0.320466	0.016879
ENSGALG00000009442	ETFDH	4	9897.39	-0.765684	0.196634	9.86254e-05
ENSGALG00000003022		8	202.969	-0.765321	0.217362	0.000429988
ENSGALG00000032250	COQ10A	33	417.179	-0.763508	0.232316	0.00101439
ENSGALG00000003227	RAB11FIP4	18	688.774	-0.762734	0.263697	0.00382235
ENSGALG00000015660	SNX30	Z	2226.24	-0.762404	0.231172	0.000973803
ENSGALG00000001950	PMPCA	17	4208.95	-0.762334	0.165038	3.85335e-06
ENSGALG00000054870		W	24.3845	-0.760503	0.488068	0.119188
ENSGALG00000015303	AFG1L	3	268.745	-0.760453	0.243579	0.00179624
ENSGALG00000008795	GPAM	6	841.154	-0.759721	0.240382	0.00157511
ENSGALG00000008094	HSPD1	7	23245	-0.759046	0.221962	0.000626883
ENSGALG00000048675		11	89.4222	-0.758982	0.318363	0.0171249
ENSGALG00000044841		19	56.0725	-0.75883	0.43793	0.0831375
ENSGALG00000041911	AAK1	22	2561.66	-0.758713	0.280553	0.00684389
ENSGALG00000011483	MPC1L	3	3050.75	-0.757254	0.243232	0.00185006
ENSGALG00000007383	HSPB8	15	2771.37	-0.756249	0.225614	0.000802397
ENSGALG00000037097	GRK3	15	3650.84	-0.756208	0.254135	0.00292398
ENSGALG00000014804	THBS4	Z	1536.77	-0.754257	0.23565	0.00137071
ENSGALG00000006038	TGFBR3	8	940.363	-0.754048	0.266961	0.00473454
ENSGALG00000049561		8	100.686	-0.752418	0.438835	0.0864224
ENSGALG00000039468		9	5340.91	-0.751974	0.158555	2.10927e-06
ENSGALG00000012260	LCT	7	193.856	-0.751837	0.440565	0.0879096
ENSGALG00000001583	TRAF1	17	466.818	-0.751283	0.237275	0.00154391
ENSGALG00000053315		3	178.566	-0.750983	0.267016	0.00491581
ENSGALG00000010681	CPT2	8	4244.31	-0.750904	0.174584	1.69941e-05
ENSGALG00000002597	MSS51	14	105.436	-0.750244	0.406176	0.0647336
ENSGALG00000003789		17	463.774	-0.749852	0.325277	0.0211513
ENSGALG00000012929	DNM1L	1	9221.1	-0.749461	0.162563	4.0214e-06
ENSGALG00000028186	RERG	1	917.599	-0.748649	0.185516	5.44871e-05
ENSGALG00000051915		3	52.6867	-0.748163	0.408088	0.0667528
ENSGALG00000009634	GFM1	9	4110.15	-0.746977	0.185609	5.7105e-05
ENSGALG00000010013	EDNRA	4	7585.59	-0.746876	0.159512	2.8372e-06
ENSGALG00000030964	LRRC20	6	413.293	-0.746836	0.252186	0.00306193
ENSGALG00000006543	PFKL	9	2897.46	-0.746193	0.201739	0.000216615
ENSGALG00000050984		Z	1066.67	-0.745846	0.263075	0.00458102
ENSGALG00000040212	FYCO1	2	1756.78	-0.744968	0.307525	0.0154157
ENSGALG00000053886		Z	118.498	-0.744025	0.291933	0.0108151
ENSGALG00000004003	AIFM1	4	6001.47	-0.744008	0.17128	1.40033e-05
ENSGALG00000038520	STRIP2	1	1200.14	-0.742704	0.207253	0.000338945
ENSGALG00000016826		1	8140.87	-0.742321	0.22355	0.00089825
ENSGALG00000038801	ATP5B	33	57950.3	-0.741827	0.262329	0.00468614
ENSGALG00000035565	ZAR1	4	61.1424	-0.741484	0.328844	0.0241445
ENSGALG00000051250		5	22.7336	-0.740427	0.526061	0.159282
ENSGALG00000034282		32	530.822	-0.739782	0.191185	0.000109078
ENSGALG00000000352	TIMM44	28	4680.18	-0.739565	0.187463	7.97565e-05
ENSGALG00000005034	ACAD9	12	7319.07	-0.739204	0.150331	8.77971e-07
ENSGALG00000001595	PHF19	17	247.109	-0.738825	0.262928	0.00495434
ENSGALG00000001918	DNAJB5	Z	522.109	-0.73875	0.280924	0.00854556
ENSGALG00000009252	PLD1	9	2054.67	-0.738663	0.337263	0.0285122
ENSGALG00000009286	ATP5G3	7	13777.2	-0.738349	0.2535	0.00358409
ENSGALG00000030707		W	126.262	-0.738233	0.289209	0.0106923
ENSGALG00000007755	NEXMIF	4	158.32	-0.737349	0.434976	0.0900475
ENSGALG00000025339		4	20.4067	-0.736898	0.533877	0.167501
ENSGALG00000011031	JAK1	8	13690	-0.735786	0.169015	1.34057e-05
ENSGALG00000021135	HAPLN3	10	2897.32	-0.735449	0.226681	0.00117687
ENSGALG00000011353	TNNI3K	8	2940.69	-0.734195	0.31808	0.0209876
ENSGALG00000006939	PFKP	2	7623.09	-0.734028	0.138476	1.15328e-07
ENSGALG00000002558	ASL1	19	23.0408	-0.733614	0.510855	0.150988
ENSGALG00000007727		12	42.6485	-0.733492	0.37574	0.0509233
ENSGALG00000050207	EMP2	14	944.383	-0.733437	0.196131	0.000184368
ENSGALG00000015218	SLC19A2	1	152.632	-0.732164	0.343296	0.0329454
ENSGALG00000035946	GUCY1A1	4	577.876	-0.731449	0.256255	0.00431208
ENSGALG00000006221	KIF1A	9	1908.92	-0.731266	0.309618	0.0181851
ENSGALG00000044485	F2RL3	28	124.404	-0.731009	0.329008	0.0262928
ENSGALG00000048104		7	842.058	-0.730622	0.427879	0.0877213
ENSGALG00000053621		5	17.562	-0.730483	0.568541	0.198849
ENSGALG00000032992	NR3C1	13	388.873	-0.729335	0.301627	0.015606
ENSGALG00000000557	ETNK2	26	191.591	-0.728595	0.214886	0.000697351
ENSGALG00000053998		6	163.445	-0.727383	0.438846	0.0974209
ENSGALG00000033017	C2orf88	7	158.923	-0.726963	0.320666	0.0233879
ENSGALG00000004991	MKRN2	12	1397.52	-0.725475	0.147836	9.23359e-07
ENSGALG00000005043		15	109.731	-0.72505	0.44381	0.102323
ENSGALG00000047060		KZ626838.1	166.225	-0.724664	0.362703	0.0457218
ENSGALG00000026585	TAFA3	26	55.5993	-0.723029	0.359787	0.0444735
ENSGALG00000039712	DHRS7C	18	377.865	-0.723006	0.331854	0.0293551
ENSGALG00000046180	TDRD1	6	184.197	-0.721717	0.311876	0.0206613
ENSGALG00000042809	NDUFV1	5	8250.71	-0.721391	0.215276	0.000805182
ENSGALG00000030220	ELMO3	11	572.498	-0.72121	0.260333	0.00559978
ENSGALG00000003802	OTUD7A	10	501.937	-0.721117	0.304364	0.0178238
ENSGALG00000014236	ATP8A1	4	991.044	-0.718894	0.260225	0.00573456
ENSGALG00000041114	GOLGA4	2	4915.99	-0.718805	0.260757	0.00584051
ENSGALG00000044404		20	1519.65	-0.718355	0.192681	0.000192847
ENSGALG00000027658	TESK1	Z	662.199	-0.717768	0.248513	0.00387392
ENSGALG00000047074		28	23.4912	-0.717458	0.488736	0.142108
ENSGALG00000002421	FAM213A	6	1768.47	-0.717422	0.198201	0.000294987
ENSGALG00000054455		27	82.3568	-0.716072	0.39273	0.0682553
ENSGALG00000046985		8	39.3357	-0.714892	0.433881	0.0994207
ENSGALG00000005567	MSI2	19	1039.12	-0.714704	0.207143	0.000559974
ENSGALG00000009272		4	1669.46	-0.714609	0.213746	0.000828006
ENSGALG00000051199		23	358.711	-0.714457	0.198221	0.000312948
ENSGALG00000055061		3	925.685	-0.714044	0.236996	0.00258768
ENSGALG00000011086	ACTA1	3	22057.3	-0.714038	0.279366	0.0105906
ENSGALG00000031527	ARL8BL	1	1860.24	-0.713304	0.197168	0.000297186
ENSGALG00000016794	MRPS9	1	4383.16	-0.712748	0.242369	0.00327414
ENSGALG00000002598	TPST1	19	2854.07	-0.712344	0.174625	4.51733e-05
ENSGALG00000027345	SLC46A2	Z	136.138	-0.712178	0.487156	0.143766
ENSGALG00000043034	KIFC3	11	2692.65	-0.709531	0.193856	0.000252133
ENSGALG00000037950	ALPK3	10	8814.49	-0.708565	0.32102	0.0272981
ENSGALG00000016955	VWA8	1	2035.31	-0.707898	0.281936	0.0120442
ENSGALG00000001048	OLFML2A	17	2059.09	-0.707681	0.221474	0.00139672
ENSGALG00000005414	MSRB1	14	209.837	-0.707586	0.209435	0.000728685
ENSGALG00000014788	CENPH	Z	1514.43	-0.707381	0.28559	0.0132526
ENSGALG00000011566	GYPC	7	2046.88	-0.706204	0.182395	0.000108016
ENSGALG00000002490	UQCRC2	14	16122.8	-0.704671	0.18348	0.000122744
ENSGALG00000011405	SLC4A7	2	4812.25	-0.704202	0.411108	0.0867242
ENSGALG00000005814		Z	123.183	-0.704034	0.311599	0.0238569
ENSGALG00000011858	KCNH5	5	146.182	-0.703998	0.523887	0.179014
ENSGALG00000048539	BHLHE41	1	130.371	-0.703333	0.334571	0.0355362
ENSGALG00000046950		KZ626838.1	68.9355	-0.701977	0.535092	0.18956
ENSGALG00000026298	SERTAD2	3	574.908	-0.701521	0.292876	0.0166074
ENSGALG00000016707	CLIC5	3	149.676	-0.700373	0.297673	0.0186311
ENSGALG00000010290	VEGFA	3	1714.61	-0.699995	0.270427	0.00964013
ENSGALG00000028283	CCDC92B	19	87.4575	-0.699906	0.358771	0.0510756
ENSGALG00000016127		1	5742.13	-0.699217	0.193967	0.000312356
ENSGALG00000031177		1	115.037	-0.698923	0.318651	0.0282799
ENSGALG00000049998	gga-mir-7468	4	25.4001	-0.698768	0.485075	0.149716
ENSGALG00000051548		9	171.211	-0.698055	0.256556	0.00651109
ENSGALG00000017085	SLC7A1	1	518.916	-0.697773	0.238031	0.00337403
ENSGALG00000008859	WDR31	17	214.265	-0.697238	0.271161	0.0101317
ENSGALG00000020884		8	62.0206	-0.696718	0.345608	0.0438086
ENSGALG00000011918	CCDC134	1	462.3	-0.696602	0.225369	0.00199525
ENSGALG00000004869	ISCU	15	7627.12	-0.695137	0.232079	0.00274208
ENSGALG00000011548	PPP1R13B	5	7730.99	-0.695125	0.261981	0.00797002
ENSGALG00000026033	SYT2	26	258.099	-0.695024	0.217908	0.00142503
ENSGALG00000036492	DAGLA	5	576.645	-0.694126	0.33055	0.0357369
ENSGALG00000034301		8	39.9387	-0.692546	0.443605	0.118482
ENSGALG00000032287	ATP2A2	15	79266.2	-0.691618	0.325119	0.0333974
ENSGALG00000033207	HIBADH	2	4384.18	-0.69152	0.179741	0.000119423
ENSGALG00000034168	WNT5A	12	438.02	-0.690593	0.208263	0.000913286
ENSGALG00000001926	HSPB1	19	12941.9	-0.690245	0.302347	0.0224331
ENSGALG00000031563	ECI1	14	4253	-0.690229	0.271008	0.0108687
ENSGALG00000003948	ALAS1	12	4045.82	-0.68942	0.186422	0.000217164
ENSGALG00000005280	DBT	8	3852.3	-0.689209	0.190625	0.000299734
ENSGALG00000002495	CHCHD2P9	19	6877.42	-0.689186	0.328878	0.0361207
ENSGALG00000047899	gga-mir-12224	14	20.4333	-0.689033	0.495742	0.164558
ENSGALG00000009788	SMYD2	3	4614.67	-0.688938	0.153654	7.33598e-06
ENSGALG00000014708	GSTK1	1	9490.25	-0.68825	0.184463	0.000190642
ENSGALG00000015435		1	1721.92	-0.687653	0.175269	8.7303e-05
ENSGALG00000006613	CTSD	5	15857.6	-0.686679	0.146808	2.90555e-06
ENSGALG00000033304	MYBL1	2	344.696	-0.686558	0.198516	0.000543288
ENSGALG00000011990	USP53	4	881.89	-0.68557	0.298247	0.0215239
ENSGALG00000008550	MRPS5	3	3240.01	-0.684126	0.231041	0.00306583
ENSGALG00000029659	BPHL	2	226.871	-0.683492	0.21023	0.00114932
ENSGALG00000033171	TGM4	2	194.142	-0.683396	0.311454	0.0282201
ENSGALG00000006334	LAP3	4	3337.31	-0.683168	0.215757	0.00154346
ENSGALG00000017118	MIPEP	1	4799.09	-0.683123	0.211698	0.00125153
ENSGALG00000016318	PCYT1B	1	49.2845	-0.682368	0.433234	0.115244
ENSGALG00000043772		27	183.049	-0.682073	0.37633	0.069919
ENSGALG00000030064		4	1822.26	-0.681868	0.223413	0.00227283
ENSGALG00000008807	DCUN1D1	9	3323.09	-0.681727	0.167536	4.71886e-05
ENSGALG00000012919	YARS2	1	1301.16	-0.681642	0.199674	0.000640684
ENSGALG00000037611		Z	1452.36	-0.680779	0.21248	0.00135547
ENSGALG00000042564	UBAC1	17	1760.95	-0.680681	0.189651	0.000331782
ENSGALG00000041635	CAMK2D	4	1057.07	-0.6804	0.270262	0.0118171
ENSGALG00000004257	TSPAN15	6	91.2579	-0.680254	0.297545	0.0222414
ENSGALG00000031895	SDK2	18	1193.8	-0.679119	0.375264	0.0703409
ENSGALG00000031973	ANKRD52	33	1449.11	-0.678894	0.335663	0.04312
ENSGALG00000050604		2	50.0843	-0.678647	0.457849	0.138274
ENSGALG00000041086	MRPL15	2	3634.9	-0.678508	0.224819	0.00254436
ENSGALG00000009828	PPP2R5A	3	4835.06	-0.678415	0.188143	0.000311135
ENSGALG00000004740	TMOD2	10	124.856	-0.677708	0.248721	0.00643466
ENSGALG00000016500	FKBP1B	3	27866.2	-0.677001	0.199711	0.000699177
ENSGALG00000017200	MTMR2	1	1998.44	-0.676605	0.220353	0.00213661
ENSGALG00000007669	EGR1	13	512.662	-0.675369	0.2535	0.00771777
ENSGALG00000007936	PGK2	4	15653	-0.674293	0.203895	0.000942819
ENSGALG00000008858	MDH1	3	27684.9	-0.674289	0.168672	6.39796e-05
ENSGALG00000028451	MT4	11	1069.41	-0.673009	0.237444	0.00459128
ENSGALG00000030530	HAND2	4	3967.48	-0.672168	0.212549	0.00156472
ENSGALG00000048204		Z	52.9377	-0.671888	0.361354	0.0629755
ENSGALG00000010875	ITGB8	2	242.978	-0.671848	0.383354	0.0796792
ENSGALG00000005979	OXSR1	2	1718.24	-0.671793	0.18502	0.000282403
ENSGALG00000009967	LRPPRC	3	11747.9	-0.671484	0.182211	0.000228519
ENSGALG00000010896	TMEM161B	Z	444.713	-0.67145	0.311832	0.0312994
ENSGALG00000003862	LRRFIP1	7	3000.1	-0.671285	0.297734	0.0241558
ENSGALG00000005632	IRAG1	5	935.395	-0.671157	0.288784	0.0201211
ENSGALG00000020249	RAPGEF2	4	2761.84	-0.671082	0.340587	0.0487961
ENSGALG00000011266	PPM1K	4	2841.2	-0.670657	0.176155	0.000140555
ENSGALG00000048701		5	26.2702	-0.669198	0.508227	0.187929
ENSGALG00000032467	C11orf52	24	236.967	-0.667968	0.205567	0.00115654
ENSGALG00000010286	DLST	5	7218.79	-0.667853	0.200488	0.000864927
ENSGALG00000010120	KIF2C	8	2391.93	-0.667776	0.22568	0.00308695
ENSGALG00000016128	B3GALT5	1	134.054	-0.667127	0.351712	0.0578546
ENSGALG00000006886	DACH2	4	353.299	-0.666704	0.214886	0.0019183
ENSGALG00000005683	ARHGAP29	8	2697.38	-0.666202	0.250463	0.00781687
ENSGALG00000004966	NYAP2	9	29.1176	-0.666038	0.501498	0.184146
ENSGALG00000034434	IDH2	10	20483.4	-0.66579	0.208734	0.00142439
ENSGALG00000048256		15	101.423	-0.665562	0.427306	0.119333
ENSGALG00000051083		3	314.72	-0.665192	0.520281	0.201064
ENSGALG00000014645	MEF2C	Z	1948.93	-0.665132	0.298026	0.0256288
ENSGALG00000049218	DYX1C1	10	754.889	-0.664353	0.166255	6.44249e-05
ENSGALG00000011624	PNLDC1	3	55.1318	-0.662992	0.36301	0.0677942
ENSGALG00000021180	PAQR9	9	84.5972	-0.662922	0.383151	0.0835975
ENSGALG00000009698	SLC38A1	1	3159.97	-0.662468	0.352137	0.0599341
ENSGALG00000028501	DCK	4	2095.83	-0.662379	0.195347	0.000696935
ENSGALG00000048349	PRC1	10	1525.44	-0.662343	0.218787	0.00246721
ENSGALG00000007800	ZDHHC15	4	109.372	-0.661071	0.357574	0.0644914
ENSGALG00000031158	OAT	6	7148.03	-0.65946	0.181169	0.000272614
ENSGALG00000035465	WDR76	10	2244.11	-0.658444	0.279513	0.0184885
ENSGALG00000051142	FAM180B	5	41.6715	-0.658335	0.427456	0.12353
ENSGALG00000002679	GLT1D1	15	424.799	-0.655903	0.192746	0.00066667
ENSGALG00000037326	MAP3K9	5	464.562	-0.655779	0.478769	0.170775
ENSGALG00000053469		2	47.7089	-0.655577	0.42072	0.119179
ENSGALG00000007507	MASTL	2	1811.88	-0.654945	0.199622	0.00103467
ENSGALG00000008836	ATP6AP1	1	3252.97	-0.654904	0.185923	0.000427584
ENSGALG00000051919	BAALC	2	109.202	-0.654835	0.275049	0.0172752
ENSGALG00000051398		2	3762.97	-0.654474	0.20812	0.0016626
ENSGALG00000008998	FAM179A	3	154.279	-0.653526	0.325682	0.0447886
ENSGALG00000015437	MPC2	1	3513.75	-0.653328	0.248885	0.00866434
ENSGALG00000002763	FRZB	7	4039.75	-0.651573	0.191735	0.00067806
ENSGALG00000008179	NT5C2	6	3303.09	-0.65104	0.147826	1.06227e-05
ENSGALG00000039826	CNGA3	1	50.1951	-0.650833	0.405163	0.108197
ENSGALG00000052781		20	90.0622	-0.650617	0.445468	0.144146
ENSGALG00000015961	SUCLG1	4	7109.23	-0.650488	0.179222	0.000283958
ENSGALG00000053194		1	3930.98	-0.649994	0.184808	0.000436238
ENSGALG00000003919	MRPL22	13	2500.27	-0.648459	0.196718	0.000979355
ENSGALG00000009837	DTL	3	1019.44	-0.647747	0.18826	0.000580215
ENSGALG00000032373		6	3966.84	-0.646664	0.184059	0.000442495
ENSGALG00000044797		Z	207.986	-0.646637	0.264262	0.0144067
ENSGALG00000017032	SLC25A15	1	1358.5	-0.646525	0.162794	7.14448e-05
ENSGALG00000011235	GALNT15	2	298.198	-0.646119	0.270821	0.0170429
ENSGALG00000048771		19	4695.34	-0.645822	0.193545	0.000847476
ENSGALG00000004897	GTSE1	1	2571.07	-0.645805	0.251075	0.0101065
ENSGALG00000041238		17	657.494	-0.645049	0.192833	0.000822461
ENSGALG00000032029	SRF	3	5232.64	-0.644652	0.175544	0.000240364
ENSGALG00000000795	MFSD12	28	530.121	-0.644098	0.184157	0.000469554
ENSGALG00000004612	MTHFR	21	1298.18	-0.643957	0.157087	4.1427e-05
ENSGALG00000022704		1	31.8734	-0.643398	0.478068	0.178357
ENSGALG00000001568	NFS1	20	7106.35	-0.643361	0.217426	0.00308646
ENSGALG00000013728	PPAT	4	2649.42	-0.642467	0.212497	0.00249935
ENSGALG00000038733	TRAK1	2	2570.84	-0.641454	0.239801	0.00747431
ENSGALG00000011618	ADSS1	5	1048.65	-0.641064	0.202313	0.00153133
ENSGALG00000016893	UGGT2	1	3588.04	-0.640936	0.301062	0.0332609
ENSGALG00000036582		14	48.3472	-0.640759	0.359827	0.0749541
ENSGALG00000005521	PER2	9	2789.03	-0.640123	0.285148	0.024776
ENSGALG00000011306	DES	7	28710	-0.64008	0.196453	0.00112128
ENSGALG00000013830	PRELID3A	2	422.529	-0.639724	0.240751	0.00787932
ENSGALG00000004424	SEC16B	8	85.367	-0.639253	0.351569	0.0690202
ENSGALG00000005845	SLC7A5	11	3854.35	-0.639214	0.19008	0.000771385
ENSGALG00000000168	ADORA1	26	320.486	-0.638908	0.216899	0.00322285
ENSGALG00000004550	PPTC7	15	1837.24	-0.638873	0.27644	0.020829
ENSGALG00000010211	ALDH6A1	5	5136.01	-0.638587	0.161147	7.40906e-05
ENSGALG00000046637		3	262.138	-0.638368	0.441701	0.148388
ENSGALG00000001319	CAMK1G	26	303.012	-0.638363	0.485317	0.188391
ENSGALG00000053125		2	384.71	-0.638222	0.253787	0.0119101
ENSGALG00000045856	BBOF1	5	477.328	-0.6382	0.191719	0.000872129
ENSGALG00000007892	SPAG6	2	350.848	-0.637868	0.335183	0.0570346
ENSGALG00000047904		W	31.4758	-0.637795	0.399618	0.110486
ENSGALG00000006690	ECHDC3	1	1226.23	-0.637726	0.175179	0.000272197
ENSGALG00000046358	FBLN7	3	117.699	-0.637667	0.29815	0.0324565
ENSGALG00000015656	PALM2AKAP2	Z	4729.61	-0.637371	0.192578	0.00093402
ENSGALG00000010197	COQ6	5	1374.29	-0.637093	0.232158	0.00606552
ENSGALG00000013026	HDHD5	1	476.808	-0.636645	0.211508	0.00261228
ENSGALG00000035031	HEY1	2	433.78	-0.636176	0.201699	0.00161001
ENSGALG00000007839	NCAM1	24	17086.1	-0.635224	0.271387	0.0192498
ENSGALG00000041418	NDUFS2	25	6506.07	-0.634734	0.228739	0.00552142
ENSGALG00000054420		2	3259.14	-0.634056	0.239804	0.00819183
ENSGALG00000020615	STK32C	6	168.096	-0.633357	0.279923	0.0236596
ENSGALG00000037423	PTPRK	3	4724.57	-0.633209	0.299608	0.0345612
ENSGALG00000036117	TENT5B	23	292.711	-0.632464	0.214698	0.00322081
ENSGALG00000014861	NIM1K	Z	277.931	-0.632252	0.338242	0.0615912
ENSGALG00000007557	RUBCN	9	671.758	-0.63187	0.214375	0.00320357
ENSGALG00000002726	KIF1B	21	14043.6	-0.631128	0.312706	0.0435623
ENSGALG00000014442	GAPDH	1	193586	-0.630692	0.18863	0.000827159
ENSGALG00000004350	WDR41	Z	487.995	-0.630565	0.175609	0.000329753
ENSGALG00000007515	SFRP5	6	69.8948	-0.630346	0.355495	0.0762037
ENSGALG00000035332		6	47.4872	-0.629607	0.421832	0.135554
ENSGALG00000005088	CAMK2G	6	1471.04	-0.629464	0.179299	0.000446935
ENSGALG00000011379	SLC44A5	8	795.971	-0.629285	0.255851	0.01391
ENSGALG00000030012	EMILIN3	20	488.526	-0.628865	0.215147	0.00346728
ENSGALG00000052408		17	200.699	-0.628083	0.367107	0.0870998
ENSGALG00000015002	MRPS27	Z	3267.65	-0.627803	0.218197	0.0040118
ENSGALG00000043318	NMNAT1	21	703.488	-0.627792	0.259579	0.0155846
ENSGALG00000034275	MCAT	1	715.503	-0.62763	0.207711	0.00251402
ENSGALG00000004956	GPI	11	28563.2	-0.627418	0.206631	0.00239408
ENSGALG00000027822		18	527.999	-0.627251	0.247147	0.01115
ENSGALG00000001375	COX10	18	1092.16	-0.627095	0.161172	9.98938e-05
ENSGALG00000032329	NPM3	6	779.626	-0.627	0.331475	0.0585518
ENSGALG00000052240		16	1033.12	-0.626884	0.179853	0.000491166
ENSGALG00000040017	THRA	27	2329.39	-0.626151	0.25568	0.0143268
ENSGALG00000009848	LPGAT1	3	2660.51	-0.625104	0.2784	0.0247457
ENSGALG00000007821	DNAJA3	14	3116.26	-0.625024	0.18712	0.000837101
ENSGALG00000021262	GHITM	6	21047.7	-0.624993	0.227874	0.0060934
ENSGALG00000048523		4	30.9724	-0.624924	0.421952	0.138598
ENSGALG00000033557	CTSH	10	1643.53	-0.624826	0.241198	0.00958342
ENSGALG00000001473	MIB2	21	1888.84	-0.624084	0.259579	0.0162073
ENSGALG00000002563	TPM4	28	66326.1	-0.623948	0.228402	0.00629909
ENSGALG00000009219	C3H1orf95	3	158.655	-0.623821	0.26842	0.0201227
ENSGALG00000028302	UQCRQ	13	4866.84	-0.623528	0.159167	8.94942e-05
ENSGALG00000026380	UBE2C	20	3792.3	-0.622639	0.273636	0.0228805
ENSGALG00000033446	COX5B	22	4924.55	-0.621303	0.342084	0.069335
ENSGALG00000034030	L3MBTL3	3	1241.48	-0.620463	0.237713	0.00905054
ENSGALG00000050058	REEP1	4	1836.84	-0.62018	0.442268	0.160835
ENSGALG00000001209	TP53INP2	20	144.86	-0.619533	0.419887	0.140085
ENSGALG00000036775	SETBP1	Z	1433.14	-0.619527	0.428213	0.147961
ENSGALG00000000399	DUSP28	9	120.345	-0.619336	0.312692	0.0476296
ENSGALG00000033051	CAMK1D	1	2768.4	-0.619249	0.315468	0.0496511
ENSGALG00000010182	SLC29A1	3	753.407	-0.619222	0.207797	0.00288315
ENSGALG00000011275	DEPDC1	8	1289.51	-0.619052	0.195357	0.00153062
ENSGALG00000040173	NDUFS8	5	4038.3	-0.61846	0.222039	0.00534672
ENSGALG00000011473	RPS6KA2	3	411.732	-0.618122	0.203145	0.00234417
ENSGALG00000010406	TMEM63C	5	1826.82	-0.617894	0.294019	0.0355929
ENSGALG00000012177		7	921.046	-0.617783	0.31821	0.0522062
ENSGALG00000008486	CACNA2D1	1	7256.99	-0.617777	0.470628	0.189296
ENSGALG00000042411	GASK1B	4	8250.62	-0.617488	0.212146	0.00360649
ENSGALG00000010009	TTC29	4	107.074	-0.617162	0.37667	0.101324
ENSGALG00000000843	DOT1L	28	2583.63	-0.616623	0.346927	0.0755047
ENSGALG00000012265	MICALL1	1	1502.52	-0.616582	0.270296	0.0225403
ENSGALG00000042485		23	1136.44	-0.616402	0.198369	0.00188775
ENSGALG00000004799		19	606.646	-0.61636	0.250781	0.0139806
ENSGALG00000031186		1	72.4563	-0.616209	0.389837	0.11395
ENSGALG00000040254	UQCC1	20	1655.85	-0.61552	0.216304	0.00443245
ENSGALG00000001184	COQ9	11	3025.56	-0.615355	0.228842	0.00716678
ENSGALG00000015018	CASQ2	1	6458.02	-0.61518	0.216733	0.00453368
ENSGALG00000047265		28	79.2888	-0.614781	0.321271	0.0556723
ENSGALG00000043758		W	11100.2	-0.614492	0.199165	0.00203325
ENSGALG00000030886	PTGDS	17	71.8691	-0.614359	0.350741	0.0798422
ENSGALG00000049273	MICOS13	28	1534.69	-0.614208	0.18365	0.000824468
ENSGALG00000049668	MFSD4B	3	516.838	-0.614012	0.258072	0.0173488
ENSGALG00000011861	SYT16	5	243.141	-0.613761	0.282535	0.0298303
ENSGALG00000036783		8	301.115	-0.613431	0.311137	0.0486578
ENSGALG00000051033		1	111.163	-0.613036	0.24725	0.0131597
ENSGALG00000027365	HIVEP3	23	513.707	-0.61295	0.409231	0.134183
ENSGALG00000053062		5	49.0388	-0.612124	0.373742	0.101458
ENSGALG00000010664	KIF26B	3	644.115	-0.61186	0.400527	0.126603
ENSGALG00000014841	HDDC2	3	2225.15	-0.6115	0.219346	0.0053061
ENSGALG00000032097	TBX20	2	6570.03	-0.611256	0.200146	0.00225779
ENSGALG00000009639	DDX60	4	138.322	-0.610973	0.398413	0.125148
ENSGALG00000047276		31	158.609	-0.610578	0.331707	0.065663
ENSGALG00000050757	ZDHHC12	17	952.661	-0.610426	0.202461	0.00256958
ENSGALG00000028424		23	219.503	-0.610091	0.349273	0.0806815
ENSGALG00000008369	ABCC5	9	3393.07	-0.609656	0.291359	0.0363978
ENSGALG00000040492	LONP1	28	4782.68	-0.609368	0.176313	0.000547918
ENSGALG00000031248	RMDN1	2	678.082	-0.609277	0.20671	0.0032036
ENSGALG00000008811	SLC1A4	3	685.575	-0.608194	0.198996	0.00224072
ENSGALG00000026449		12	548.197	-0.607491	0.31018	0.0501697
ENSGALG00000029011	SLC35F1	3	580.814	-0.606422	0.233972	0.00954591
ENSGALG00000011361	CRYZ	8	1579.08	-0.606385	0.150985	5.91459e-05
ENSGALG00000053950		27	2613.29	-0.605758	0.296054	0.0407459
ENSGALG00000049557		33	1145.94	-0.605151	0.282235	0.0320216
ENSGALG00000014769	NLN	Z	1748.52	-0.604885	0.17203	0.000437826
ENSGALG00000046852		3	163.951	-0.604685	0.362597	0.0953848
ENSGALG00000009446	LSMEM1	1	835.509	-0.604526	0.191442	0.00158991
ENSGALG00000049069		W	73.4824	-0.60449	0.317277	0.0567479
ENSGALG00000007579	APBB1IP	2	449.267	-0.603967	0.202278	0.00282813
ENSGALG00000010187	SLC1A1	Z	267.025	-0.603544	0.245823	0.0140807
ENSGALG00000003439	PLEKHM2	21	2879.39	-0.602757	0.211272	0.00433108
ENSGALG00000024077		1	588.012	-0.601962	0.253206	0.0174369
ENSGALG00000009076	NDUFB5	9	6428.95	-0.601825	0.200668	0.00270768
ENSGALG00000014857		Z	634.778	-0.601676	0.304178	0.0479239
ENSGALG00000008097	CELF1	5	2304.31	-0.601225	0.238366	0.0116598
ENSGALG00000049165		1	68.537	-0.60076	0.373283	0.10753
ENSGALG00000016988	RUBCNL	1	767.702	-0.600705	0.236749	0.0111708
ENSGALG00000010214	JADE1	4	514.202	-0.600035	0.184928	0.00117576
ENSGALG00000016555	HADHB	3	7672.66	-0.59986	0.138803	1.54864e-05
ENSGALG00000016675	PAQR8	3	249.197	-0.599285	0.248293	0.0157948
ENSGALG00000032893	SHISA4	26	1236.05	-0.598878	0.221331	0.00681403
ENSGALG00000009062	CDK14	2	1712.42	-0.598593	0.24438	0.0143079
ENSGALG00000049219		W	66.2003	-0.598359	0.41979	0.154048
ENSGALG00000003911	CACNG5	18	233.146	-0.597887	0.348712	0.0864261
ENSGALG00000028608	BTC	4	81.4377	-0.597862	0.385713	0.121137
ENSGALG00000014128	A4GALT	1	955.144	-0.597727	0.310074	0.0538937
ENSGALG00000040373	EXOSC2	17	3764.83	-0.596807	0.224825	0.00794177
ENSGALG00000013824	HECA	3	1358.05	-0.595676	0.279054	0.0327913
ENSGALG00000009269	PTGR2	5	2418.16	-0.595609	0.155467	0.000127579
ENSGALG00000033568	TMEM70	2	3198.79	-0.595604	0.195718	0.00234095
ENSGALG00000015110	FAM189A2	Z	407.419	-0.595423	0.244843	0.0150216
ENSGALG00000020057	PIGF	3	706.647	-0.595187	0.175886	0.000714571
ENSGALG00000019171	GATD3A	1	7503.27	-0.595161	0.191237	0.00185718
ENSGALG00000002234	UNC13D	18	189.486	-0.595062	0.219054	0.00659745
ENSGALG00000002055	HES4	21	1451.12	-0.594872	0.212866	0.00519667
ENSGALG00000034918		28	207.746	-0.594789	0.328031	0.0697995
ENSGALG00000047842		4	50.8587	-0.594774	0.401221	0.138232
ENSGALG00000039837	CCKBR	1	43.7443	-0.594644	0.384466	0.121941
ENSGALG00000009822	PACC1	3	1250.16	-0.59457	0.150205	7.54537e-05
ENSGALG00000033453		2	129.598	-0.594394	0.243707	0.0147292
ENSGALG00000037545	GRIP2	12	670.728	-0.593554	0.387113	0.125206
ENSGALG00000050189		2	79.3086	-0.593382	0.287941	0.0393245
ENSGALG00000029585	FUNDC2	4	2743.88	-0.593288	0.270361	0.0282047
ENSGALG00000001603	NARF	18	3227.42	-0.593143	0.360793	0.100177
ENSGALG00000008428	CDK15	7	38.0075	-0.592103	0.402533	0.141306
ENSGALG00000028696	FTL	5	607.057	-0.591848	0.316811	0.061742
ENSGALG00000030011	ZNF704	2	1551.44	-0.590497	0.206475	0.00423789
ENSGALG00000025819	UQCRFS1	11	9748.48	-0.590014	0.179956	0.00104302
ENSGALG00000002579	RIMBP2	15	819.499	-0.588364	0.359166	0.101392
ENSGALG00000004570	NCOA3	20	1430.77	-0.58816	0.320638	0.0666035
ENSGALG00000007426	MKX	2	191.178	-0.587682	0.334281	0.0787393
ENSGALG00000006048		19	919.727	-0.587334	0.208864	0.00492276
ENSGALG00000016504	ITSN2	3	2577.45	-0.586949	0.230938	0.0110351
ENSGALG00000007483	LRIG1	12	619.317	-0.586799	0.238505	0.0138814
ENSGALG00000013754	PLAGL1	3	2588.27	-0.586769	0.253555	0.0206585
ENSGALG00000037682	CCSER2	6	713.266	-0.586634	0.390519	0.133047
ENSGALG00000015683	GNG10	Z	1392.79	-0.586541	0.159829	0.000242736
ENSGALG00000002539	KCNN2	Z	90.881	-0.586399	0.336269	0.0811875
ENSGALG00000046030		21	36.3266	-0.585886	0.378388	0.121533
ENSGALG00000054449	SDHC	25	3766.76	-0.585839	0.26789	0.0287524
ENSGALG00000015252	ST3GAL6	1	2764.57	-0.585017	0.172284	0.000684673
ENSGALG00000003841		4	63.8068	-0.584993	0.335849	0.0815377
ENSGALG00000015742	MRPL39	1	1836.25	-0.58426	0.237601	0.0139325

## Sheet: SAN ENRICHED GENES
GENE ID	GENE NAME	chromosome	baseMean	log2FoldChange (SAN/At)	lfcSE	pvalue
ENSGALG00000019845	AvBD9	3	52.8866	7.95828	3.00807	3.45436e-68
ENSGALG00000010974	GSC	5	194.008	7.42325	1.2941	9.68051e-09
ENSGALG00000035539	HOXC4	33	16.6066	7.40435	1.36506	5.82154e-08
ENSGALG00000031211	LBX2	4	42.4201	6.94096	1.08144	1.37819e-10
ENSGALG00000030416		33	22.2173	6.8431	1.29576	1.28373e-07
ENSGALG00000016044	SIM2	1	20.1255	6.74811	1.49895	6.73545e-06
ENSGALG00000030991	IRX1	2	34.8511	6.66014	1.11242	2.13626e-09
ENSGALG00000016473	OSR1	3	148.156	6.62751	0.691102	8.82814e-22
ENSGALG00000025929	HOXA5	2	274.439	6.53559	1.135	8.50134e-09
ENSGALG00000037272	HOXD8	7	28.6811	6.4368	1.08459	2.9423e-09
ENSGALG00000027192	NTS	1	169.371	6.37455	0.494955	5.90477e-38
ENSGALG00000039092	STAC	2	43.953	6.36921	0.973183	5.96087e-11
ENSGALG00000010572	TSHR	5	150.906	6.2449	0.633003	5.87364e-23
ENSGALG00000013193	IRX2	2	25.7357	6.17403	1.21284	3.56997e-07
ENSGALG00000015967	LRRTM1	4	13.2125	6.08476	1.31942	3.99416e-06
ENSGALG00000003193	CRABP-I	10	359.759	5.83967	0.480575	5.63781e-34
ENSGALG00000027925	HOXA3	2	544.836	5.73465	0.329318	6.49456e-68
ENSGALG00000007831	TLX1	6	15.5192	5.64579	1.20302	2.69228e-06
ENSGALG00000047108		4	50.8868	5.62203	0.683073	1.86442e-16
ENSGALG00000011271	LUM	1	2527.09	5.60489	0.320064	1.16436e-68
ENSGALG00000039728	SHOX2	9	2178.04	5.51906	0.426375	2.5355e-38
ENSGALG00000011003	SLC35F3	3	209.323	5.45978	0.43887	1.57445e-35
ENSGALG00000022622	HOXA4	2	473.176	5.45552	0.409136	1.46314e-40
ENSGALG00000027213	ALX1	1	600.475	5.3883	0.378715	6.15559e-46
ENSGALG00000028236	PRRX2	17	168.07	5.38677	0.62438	6.27659e-18
ENSGALG00000029510	STK32B	4	72.5357	5.29195	1.54393	0.000608977
ENSGALG00000040521	HOXA2	2	283.006	5.24308	0.383048	1.20125e-42
ENSGALG00000032282	CALB1	2	96.3228	5.21689	0.51438	3.59339e-24
ENSGALG00000026989	HOXA7	2	36.9822	5.18184	0.726835	1.00862e-12
ENSGALG00000039101	ASIP	20	11.4028	5.06326	1.242	4.56806e-05
ENSGALG00000003034	SS2	21	95.3071	5.04282	0.582776	5.0121e-18
ENSGALG00000012106	SCTR	7	234.2	5.01326	0.399461	3.97192e-36
ENSGALG00000012754	PAH	1	31.7848	4.92416	0.796947	6.46007e-10
ENSGALG00000029264	PI15	2	612.983	4.90242	0.492852	2.59816e-23
ENSGALG00000032409		3	16.8308	4.88064	1.10398	9.82744e-06
ENSGALG00000014966	HGD	1	10.4756	4.86418	1.83629	0.0080752
ENSGALG00000014766	HAO2	1	12.8292	4.79462	1.09055	1.10002e-05
ENSGALG00000028908	HOXA6	2	10.0064	4.7275	1.38935	0.000667324
ENSGALG00000049009		5	33.0522	4.64821	0.788026	3.66707e-09
ENSGALG00000027633	RASSF9	1	281.49	4.64805	0.359247	2.73569e-38
ENSGALG00000041878	AQP5	33	106.538	4.57455	0.542308	3.30279e-17
ENSGALG00000017197	CNTN5	1	177.529	4.54703	0.378025	2.52049e-33
ENSGALG00000026395	TRABD2A	Z	735.066	4.54378	0.294771	1.30567e-53
ENSGALG00000028095	HOXA1	2	28.4017	4.54001	0.706467	1.30692e-10
ENSGALG00000011182	DLL1	3	196.8	4.53699	0.400555	9.67152e-30
ENSGALG00000004722	ASPN	12	89.258	4.53158	0.6281	5.40337e-13
ENSGALG00000005985	GDF10	6	29.756	4.52981	0.683779	3.48031e-11
ENSGALG00000002118	KCNMB1	13	127.909	4.52232	0.400112	1.27344e-29
ENSGALG00000013007		1	36.641	4.51852	0.745283	1.33759e-09
ENSGALG00000051780		2	20.895	4.50483	0.926099	1.14858e-06
ENSGALG00000038090		1	12.3954	4.40462	1.06661	3.63458e-05
ENSGALG00000005797	COL20A1	20	51.1	4.37988	0.685473	1.66356e-10
ENSGALG00000048528		4	38.1807	4.34035	0.577448	5.62905e-14
ENSGALG00000048045		8	38.4436	4.28699	0.67589	2.25729e-10
ENSGALG00000016805	SULT1C3	1	13.9166	4.28623	1.49448	0.00413017
ENSGALG00000008060	PRKAR2B	1	768.89	4.28514	0.325092	1.12422e-39
ENSGALG00000011633	SLC5A8	1	43.2573	4.27289	0.752549	1.36369e-08
ENSGALG00000014884	ISL1	Z	181.336	4.2654	0.349133	2.51887e-34
ENSGALG00000036358	LMO3	1	26.7471	4.25484	0.678339	3.55446e-10
ENSGALG00000032740	HOXB7	27	34.2733	4.24691	0.75159	1.59919e-08
ENSGALG00000009926	HAAO	3	16.4259	4.13518	1.39808	0.00309883
ENSGALG00000036390	PPP1R17	2	471.749	4.12663	0.357246	7.27793e-31
ENSGALG00000005123	WNT7A	12	17.3044	4.10892	0.958374	1.80785e-05
ENSGALG00000016288	IL1RAPL1	1	19.4431	4.1062	0.843703	1.13377e-06
ENSGALG00000005242		2	36.0756	4.09196	0.594631	5.92195e-12
ENSGALG00000044794		14	43.235	4.08574	0.589621	4.22526e-12
ENSGALG00000009041		3	182.839	4.07011	0.30185	1.94591e-41
ENSGALG00000040320	HOXB8	27	15.6127	4.06302	0.878478	3.74473e-06
ENSGALG00000010794	MEOX2	2	384.375	4.05723	0.3229	3.28986e-36
ENSGALG00000028158	FGF7	10	15.7119	4.03164	1.14924	0.000451318
ENSGALG00000042389	EN1	7	32.2886	4.02856	0.683227	3.71594e-09
ENSGALG00000050793		9	12.4508	4.02639	1.19696	0.000768648
ENSGALG00000005857	ALOX5	6	433.976	4.02116	0.288154	2.93725e-44
ENSGALG00000041043	ABRA	2	226.433	3.99563	0.410831	2.34232e-22
ENSGALG00000028682	CBLN2	2	74.0822	3.97704	0.411653	4.40868e-22
ENSGALG00000023303	SIX2	3	28.1417	3.94954	0.745399	1.16724e-07
ENSGALG00000023419	HOXD4	7	19.0246	3.94488	0.94663	3.08239e-05
ENSGALG00000006471	SLCO2A1	9	218.75	3.93176	0.322165	2.952e-34
ENSGALG00000041736	FSTL5	4	17.7339	3.91527	0.778342	4.89791e-07
ENSGALG00000007139	FAM107A	12	41.253	3.91343	0.541003	4.70145e-13
ENSGALG00000053402		5	14.325	3.86825	1.014	0.000136264
ENSGALG00000037777	MSC	2	47.4862	3.86452	0.665872	6.48712e-09
ENSGALG00000044070	CCDC78	14	18.1277	3.84754	0.776616	7.26126e-07
ENSGALG00000006346	CXCL14	13	265.618	3.81315	1.23273	0.00197967
ENSGALG00000035825		28	15.0379	3.79997	0.842512	6.47385e-06
ENSGALG00000011117	AGT	3	16.4832	3.79199	1.35607	0.00516916
ENSGALG00000031656	EYA4	3	361.736	3.77582	0.355362	2.27329e-26
ENSGALG00000009719	PCDH10	4	95.6416	3.76798	0.375938	1.2093e-23
ENSGALG00000050415		20	23.5813	3.76754	0.661151	1.20904e-08
ENSGALG00000050196		14	104.347	3.7609	0.585186	1.30279e-10
ENSGALG00000026263	RGS8	8	20.3995	3.75937	0.743179	4.22559e-07
ENSGALG00000028685	SEMA5A	2	2013.05	3.73823	0.345609	2.87975e-27
ENSGALG00000005554	ADIPOQ	9	117.7	3.72823	0.327363	4.76266e-30
ENSGALG00000031341		KZ626839.1	410.855	3.72515	0.99656	0.00018548
ENSGALG00000017272	VWF	1	2305.87	3.71202	0.387237	9.16415e-22
ENSGALG00000004279	GRIFIN	14	35.1967	3.70829	0.751872	8.13599e-07
ENSGALG00000006821	TNMD	4	153.522	3.70573	0.389685	1.91455e-21
ENSGALG00000026736	OGN	12	913.85	3.68986	0.294548	5.30058e-36
ENSGALG00000004196	UGT1A1	7	43.6048	3.68953	0.744416	7.18591e-07
ENSGALG00000005347	ADAMTS18	11	335.479	3.63762	0.420099	4.76065e-18
ENSGALG00000012973	ESR1	3	13.038	3.60056	0.856691	2.63551e-05
ENSGALG00000010391	MMRN1	4	387.768	3.57425	0.330576	3.01418e-27
ENSGALG00000001347	LHX6	17	76.9091	3.56319	0.489847	3.4878e-13
ENSGALG00000015623	HGFAC	4	13.9297	3.55909	1.27447	0.00522856
ENSGALG00000000653	CNTN2	26	42.5683	3.55378	0.604568	4.14731e-09
ENSGALG00000004093	TBX22	4	31.608	3.50394	0.654253	8.52536e-08
ENSGALG00000005981	GDF2	6	52.5156	3.48779	0.710545	9.17223e-07
ENSGALG00000005801	CHRNA4	20	87.2691	3.48397	0.419248	9.56656e-17
ENSGALG00000030140	CCDC3	1	54.5346	3.47549	0.616616	1.73646e-08
ENSGALG00000054418		3	31.8087	3.46512	0.604056	9.66993e-09
ENSGALG00000026790	DMRT2	Z	29.4006	3.4514	0.674712	3.13147e-07
ENSGALG00000029006	SYPL1	1	536.43	3.39855	0.27386	2.31204e-35
ENSGALG00000047316		9	13.0218	3.3955	0.897024	0.000153528
ENSGALG00000017044	TRPC4	1	133.636	3.37913	0.370035	6.7289e-20
ENSGALG00000015028	RLN3	Z	30.6921	3.37852	0.712788	2.1386e-06
ENSGALG00000004358	AMZ1	14	12.9173	3.37154	0.816879	3.66989e-05
ENSGALG00000002170		26	80.2149	3.32248	0.387252	9.51754e-18
ENSGALG00000008072	CHRDL1	4	1000.51	3.32032	0.360894	3.57107e-20
ENSGALG00000017168	SLN	1	2502.54	3.31864	0.314941	5.81267e-26
ENSGALG00000020292	GABRE	4	19.9342	3.30676	0.7595	1.33756e-05
ENSGALG00000041344	FABP5	2	660.612	3.29386	0.341567	5.2426e-22
ENSGALG00000011270	KERA	1	15.9684	3.27184	1.15139	0.00448829
ENSGALG00000018557	SOD3	4	1169.35	3.26338	0.220953	2.30208e-49
ENSGALG00000012290	SOX10	1	17.5631	3.24988	0.849505	0.000130445
ENSGALG00000006833	ITIH2	1	88.4874	3.24087	1.302	0.0128051
ENSGALG00000000284	HOXB4	27	999.112	3.23685	0.316269	1.38943e-24
ENSGALG00000040415		5	77.9671	3.20448	0.371454	6.30679e-18
ENSGALG00000013900	MAP7	3	289.229	3.19602	0.380587	4.55666e-17
ENSGALG00000005401	WNT9A	2	121.615	3.19047	1.06487	0.00273441
ENSGALG00000034684		3	13.5744	3.18076	0.817576	0.000100049
ENSGALG00000027494	SPTSSB	9	74.9707	3.17295	0.510935	5.29557e-10
ENSGALG00000013454	HOXB1	27	15.9618	3.16094	0.731944	1.57056e-05
ENSGALG00000050860		6	38.7676	3.14939	0.566054	2.64022e-08
ENSGALG00000038364	CCN3	2	325.396	3.14595	0.240725	4.97217e-39
ENSGALG00000023436	HDC	10	32.8759	3.14239	0.596599	1.38534e-07
ENSGALG00000006376	TMC3	10	38.9503	3.13191	0.56095	2.36091e-08
ENSGALG00000033960	ADGRB1	2	120.982	3.11123	0.37402	8.92065e-17
ENSGALG00000015434	GRIK2	3	55.5639	3.10123	0.473789	5.92621e-11
ENSGALG00000039311	SMAGP	33	33.1372	3.09858	0.666859	3.37571e-06
ENSGALG00000029301	BMP2	3	2400.79	3.09367	0.177088	2.44142e-68
ENSGALG00000045052	MAB21L1	1	21.9394	3.07641	0.768161	6.20431e-05
ENSGALG00000000639	LRRN2	26	64.1635	3.07307	0.379028	5.15612e-16
ENSGALG00000001936	MYO7B	9	122.289	3.06999	0.460663	2.65964e-11
ENSGALG00000003952	RBPJL	20	245.991	3.05996	0.282983	2.97957e-27
ENSGALG00000033407	BRINP3	8	112.459	3.05892	0.43578	2.22794e-12
ENSGALG00000006807	PLSCR5	9	16.1886	3.0572	0.775203	8.02187e-05
ENSGALG00000034751	TRPA1	2	80.7647	3.05201	0.34771	1.67188e-18
ENSGALG00000033664	MOV10L1	1	75.4344	3.04592	0.567142	7.84518e-08
ENSGALG00000015248	SNTG1	2	101.748	3.04553	0.31942	1.50516e-21
ENSGALG00000039411	COL25A1	4	11.222	3.04053	0.897792	0.000707442
ENSGALG00000014742	HTR1A	Z	10.1773	3.00704	0.905339	0.000895508
ENSGALG00000035094	CDH17	2	51.801	3.00035	0.442309	1.174e-11
ENSGALG00000009498	NPY1R	4	28.3195	2.98653	0.525294	1.30472e-08
ENSGALG00000041640	TWIST1	2	389.901	2.98033	0.308226	4.07112e-22
ENSGALG00000030836	PSD2	13	73.8789	2.9787	0.422422	1.77036e-12
ENSGALG00000050866	HSD3B1	1	14.6795	2.96924	0.750831	7.66595e-05
ENSGALG00000009042	ISM1	3	111.454	2.96588	0.402535	1.73196e-13
ENSGALG00000039145	CA8	2	217.6	2.96485	0.375861	3.06731e-15
ENSGALG00000004246	SLC6A4	19	246.991	2.96334	0.338157	1.89783e-18
ENSGALG00000034325	RBFOX1	14	64.8668	2.95438	0.435551	1.17633e-11
ENSGALG00000026994		1	15.4548	2.95264	0.741909	6.89761e-05
ENSGALG00000047014		8	36.8493	2.95141	0.48175	8.98725e-10
ENSGALG00000015630	EDIL3	Z	171.355	2.94558	0.277783	2.85861e-26
ENSGALG00000011612	GC	4	29.7734	2.9418	1.16206	0.0113563
ENSGALG00000012710	NCS1	17	2727.81	2.91396	0.216841	3.60818e-41
ENSGALG00000052123		12	21.6143	2.9086	0.622183	2.94204e-06
ENSGALG00000032856	GFRA2	22	13.6528	2.90693	0.977015	0.00292685
ENSGALG00000043015	FOXS1	20	54.7578	2.90646	0.500102	6.18248e-09
ENSGALG00000005661		2	15.3241	2.87274	0.776448	0.000215733
ENSGALG00000003324	PRRX1	8	340.006	2.86919	0.304614	4.54947e-21
ENSGALG00000038740	AMY2A	8	12.3029	2.86333	0.78791	0.000278975
ENSGALG00000028895		14	10.0489	2.85727	0.886848	0.00127378
ENSGALG00000040241	NTRK3	10	64.2146	2.8412	0.485865	4.9835e-09
ENSGALG00000053345		33	13.853	2.8348	0.943407	0.00265711
ENSGALG00000004969	TIMP4	12	541.18	2.83185	0.320067	8.93641e-19
ENSGALG00000042030	P4HA3	1	309.631	2.83115	0.357284	2.29827e-15
ENSGALG00000007157	TENT5D	4	22.5061	2.81657	0.762651	0.000221505
ENSGALG00000011190	PLAC8	4	101.855	2.81347	0.616897	5.09879e-06
ENSGALG00000000367	ASIC2	27	38.7766	2.79617	0.519839	7.49351e-08
ENSGALG00000000317	NEFM	22	669.867	2.78201	0.390085	9.90531e-13
ENSGALG00000036373	GSG1L	14	50.8115	2.74909	0.470727	5.21722e-09
ENSGALG00000043532	SBSPON	2	96.1539	2.731	0.331675	1.81138e-16
ENSGALG00000030255	AMBP	17	20.5046	2.72225	1.18257	0.0213365
ENSGALG00000014908	FST	Z	170.727	2.70988	0.953866	0.00449806
ENSGALG00000011614	ANO4	1	22.1688	2.70768	0.691512	9.01805e-05
ENSGALG00000040954	GPR37	1	70.3422	2.69622	0.35152	1.7176e-14
ENSGALG00000015307		1	34.1668	2.69602	0.551521	1.01692e-06
ENSGALG00000007045	ADGRA1	6	55.8744	2.6937	0.486745	3.12797e-08
ENSGALG00000021303	NPY7R	13	77.5546	2.68063	0.446052	1.8588e-09
ENSGALG00000006290	HS3ST4	14	13.907	2.68022	0.792971	0.000724921
ENSGALG00000036806	GDF11	33	21.4404	2.67983	0.637253	2.60753e-05
ENSGALG00000050148	HS3ST6	14	22.7291	2.67748	0.622886	1.71946e-05
ENSGALG00000011294	THRB	2	75.6345	2.67442	0.343073	6.41628e-15
ENSGALG00000000818		1	204.393	2.67025	0.368286	4.15245e-13
ENSGALG00000039990	TNC	17	592.322	2.67003	0.484037	3.46474e-08
ENSGALG00000010259	COL28A1	2	11.5021	2.66422	0.890951	0.00278698
ENSGALG00000026098	IL8	4	10.0251	2.65957	0.821984	0.00121409
ENSGALG00000006644		13	728.738	2.65951	0.337989	3.58521e-15
ENSGALG00000050170		5	135.112	2.65675	0.421987	3.05811e-10
ENSGALG00000035230	CSMD1	3	71.7719	2.64604	0.46977	1.77475e-08
ENSGALG00000033880	CRISPLD1	2	2452.12	2.64402	0.26515	2.02585e-23
ENSGALG00000034907	HOXB5	27	484.696	2.63003	0.424519	5.81705e-10
ENSGALG00000035679	LMO1	5	59.5821	2.62531	0.439855	2.39322e-09
ENSGALG00000009241	SFRP2	4	2637.03	2.61449	0.223146	1.04886e-31
ENSGALG00000005019	DUPD1	6	46.0468	2.61361	0.431629	1.4022e-09
ENSGALG00000053185		5	61.1993	2.58458	0.47086	4.04087e-08
ENSGALG00000053580		9	124.12	2.56975	0.46995	4.54805e-08
ENSGALG00000005903	NRIP3	5	142.71	2.55246	0.278074	4.34913e-20
ENSGALG00000048583		15	643.434	2.5423	0.254471	1.67686e-23
ENSGALG00000016653	FAM167A	3	21.0765	2.53558	0.628962	5.54501e-05
ENSGALG00000003005	CHRNB4	10	58.1278	2.52602	0.55584	5.50663e-06
ENSGALG00000013625		3	51.6142	2.51294	0.553589	5.6424e-06
ENSGALG00000049888		4	25.6341	2.51131	0.653441	0.000121437
ENSGALG00000030420	ECEL1	9	426.096	2.5113	0.292041	8.03138e-18
ENSGALG00000007543	APCDD1L	20	590.303	2.51004	0.288964	3.74265e-18
ENSGALG00000038848	MSX2	13	211.567	2.4879	0.533379	3.09492e-06
ENSGALG00000031578	CSMD3	2	37.9104	2.47844	0.678412	0.0002589
ENSGALG00000007269	GABRA3	4	55.6186	2.46769	0.372464	3.46506e-11
ENSGALG00000002132	KCNIP1	13	12.5136	2.46164	0.751917	0.00106107
ENSGALG00000012155	EGF	4	19.1058	2.4558	0.66761	0.00023461
ENSGALG00000050141		W	120.026	2.45482	0.531073	3.7937e-06
ENSGALG00000052383		2	10.3479	2.44428	0.826769	0.00311222
ENSGALG00000001437	NTM	24	115.522	2.44122	0.339742	6.69657e-13
ENSGALG00000020836	FAM237A	7	13.7024	2.43473	0.720628	0.00072851
ENSGALG00000036412	TMEM108	2	96.2353	2.42982	0.314599	1.13145e-14
ENSGALG00000015010	NSG1	4	527.626	2.42711	0.333285	3.27935e-13
ENSGALG00000010494	SLC5A9	8	77.9544	2.42065	0.403032	1.90044e-09
ENSGALG00000053138		1	12.525	2.41973	0.746889	0.00119636
ENSGALG00000041955	LRRC56	5	33.2337	2.41549	0.534674	6.25205e-06
ENSGALG00000002911	MOXD1	3	455.715	2.4093	1.17887	0.0409799
ENSGALG00000012421	ARHGAP15	7	237.537	2.4038	0.309065	7.38898e-15
ENSGALG00000010747	FBLN5	5	541.215	2.39858	0.386698	5.54945e-10
ENSGALG00000040114	PTPRZ1	1	91.1591	2.39739	0.329154	3.25288e-13
ENSGALG00000015075	B3GAT1L	1	833.498	2.39535	0.285443	4.79258e-17
ENSGALG00000003554	OPTC	26	30.7891	2.3868	0.485145	8.66431e-07
ENSGALG00000012971	CCDC170	3	21.928	2.38578	0.627047	0.000141924
ENSGALG00000009488	LRRN3	1	105.498	2.37938	0.412649	8.11155e-09
ENSGALG00000004771	C1QB	21	113.33	2.37472	0.414359	9.98007e-09
ENSGALG00000029401	SIX1	5	49.2757	2.36908	0.562553	2.53897e-05
ENSGALG00000017790	5S_rRNA	2	28.4882	2.36793	0.837365	0.00468633
ENSGALG00000001698	GABRA1	13	69.6303	2.36631	0.333451	1.28013e-12
ENSGALG00000042374	PDE11A	7	118.927	2.36302	0.311139	3.08411e-14
ENSGALG00000040995		7	68.2416	2.35637	0.594701	7.4239e-05
ENSGALG00000051550		5	49.4277	2.35552	0.402211	4.7292e-09
ENSGALG00000003015	SERPINF1	19	572.082	2.35268	0.251192	7.52902e-21
ENSGALG00000040938	NLGN1	9	101.085	2.35207	0.347429	1.28839e-11
ENSGALG00000048867		12	12.145	2.35076	0.782557	0.00266503
ENSGALG00000029596	HAS2	2	574.461	2.34943	0.212427	1.96212e-28
ENSGALG00000029429	TGFBI	13	1744.64	2.34757	0.285234	1.86686e-16
ENSGALG00000005688	DNASE1L3	12	132.747	2.3473	0.388251	1.48641e-09
ENSGALG00000002555	RET	6	60.933	2.34678	0.449617	1.79393e-07
ENSGALG00000036838		20	770.376	2.34458	0.791005	0.00303623
ENSGALG00000030929	STMN4	3	87.6421	2.34257	0.345685	1.23044e-11
ENSGALG00000047244		1	18.3047	2.33817	0.672465	0.000507042
ENSGALG00000007681	HTR2B	9	135.542	2.33569	0.323215	4.95883e-13
ENSGALG00000008447	SH2D1A	4	38.1194	2.33021	0.540816	1.64225e-05
ENSGALG00000055117		2	680.824	2.32674	0.268683	4.72634e-18
ENSGALG00000041501	AMER3	9	64.6668	2.31628	0.397601	5.68945e-09
ENSGALG00000007948	LRRC4C	5	101.415	2.31389	0.345361	2.08544e-11
ENSGALG00000002564	RGS4	8	96.1092	2.31288	0.435826	1.11519e-07
ENSGALG00000030054	PTPRN2	2	530.405	2.31257	0.329419	2.21636e-12
ENSGALG00000044675	MATN2	2	1420.98	2.31143	0.235323	9.01954e-23
ENSGALG00000010926	SPP1	4	22.434	2.30223	0.803866	0.0041839
ENSGALG00000040705		18	18.2969	2.30018	0.596276	0.000114522
ENSGALG00000007226	OSTN	9	30.6957	2.29429	0.60845	0.000162784
ENSGALG00000015461		1	303.726	2.29419	0.253188	1.29024e-19
ENSGALG00000013604	VIP	3	189.323	2.29012	0.33281	5.93688e-12
ENSGALG00000012407	LRP1B	7	112.872	2.28816	0.346197	3.85831e-11
ENSGALG00000054601		8	15.8495	2.28288	0.7898	0.00384688
ENSGALG00000048387		3	32.7672	2.27433	0.571657	6.93563e-05
ENSGALG00000041182	TBX1	15	126.65	2.27391	0.438327	2.12892e-07
ENSGALG00000039403	GRM8	1	41.8981	2.27244	0.433138	1.55056e-07
ENSGALG00000035058	CAMKV	12	266.96	2.2718	0.266763	1.64882e-17
ENSGALG00000034070	GAD1	7	25.6051	2.26914	0.587895	0.000113496
ENSGALG00000016584	EGFL6	1	227.644	2.26912	0.33166	7.82535e-12
ENSGALG00000040432	PAPPA2	8	46.5365	2.26501	0.482983	2.73693e-06
ENSGALG00000027712	SLAMF8	25	28.1449	2.26276	0.537789	2.58184e-05
ENSGALG00000001621	CLDN5	15	609.547	2.2592	0.240568	5.9381e-21
ENSGALG00000015290	LIX1	Z	33.0639	2.25848	0.49141	4.30843e-06
ENSGALG00000010224	GLIPR1L	1	225.173	2.25842	0.252842	4.17891e-19
ENSGALG00000019555	SERPINB1	2	16.8999	2.25768	0.643028	0.000446394
ENSGALG00000047383	CCN5	20	41.1699	2.2548	0.625046	0.000309258
ENSGALG00000016687	P2RY8	1	54.9476	2.25208	0.39076	8.24661e-09
ENSGALG00000001608	UNC5D	22	79.2483	2.25159	0.498403	6.25404e-06
ENSGALG00000006352	CH25H	6	65.2575	2.24653	0.356621	2.98606e-10
ENSGALG00000005007		6	11.501	2.24482	0.827771	0.00669013
ENSGALG00000001115	MMEL1	21	32.6851	2.24094	0.57169	8.86022e-05
ENSGALG00000019509	CCDC102B	2	76.0895	2.24025	0.471106	1.98148e-06
ENSGALG00000039687	NIPAL4	13	18.2579	2.23738	0.602269	0.00020327
ENSGALG00000029211	FKBP6	19	86.1366	2.2292	0.386597	8.10813e-09
ENSGALG00000030960	TRIM67	3	10.1023	2.22818	0.947101	0.0186411
ENSGALG00000005332	CACNA1D	12	1305.43	2.21402	0.489719	6.15469e-06
ENSGALG00000052962		2	33.2151	2.21099	0.628394	0.000434021
ENSGALG00000054234		1	12.3162	2.20851	0.899041	0.0140289
ENSGALG00000040070	PDIA2	14	463.038	2.20348	0.265504	1.04778e-16
ENSGALG00000007416	CD3E	24	122.8	2.20213	0.276641	1.71691e-15
ENSGALG00000026452	CAVIN4	2	62.6276	2.20032	0.381921	8.35214e-09
ENSGALG00000031496	SPINK5	13	1319.89	2.19752	0.407946	7.17322e-08
ENSGALG00000033535	RGS16	8	18.2722	2.1961	0.617428	0.000375311
ENSGALG00000011532	CYP27C1	7	182.918	2.196	0.361918	1.29763e-09
ENSGALG00000054873	NPPC	9	306.014	2.19573	0.331371	3.44407e-11
ENSGALG00000029235	CPNE4	2	279.473	2.19556	0.276587	2.05372e-15
ENSGALG00000006629	RBP4A	6	36.27	2.18814	0.809217	0.00685059
ENSGALG00000036964		1	52.5369	2.18796	0.404506	6.33865e-08
ENSGALG00000004980	KCNMA1	6	313.639	2.18354	0.279907	6.1439e-15
ENSGALG00000010032		3	141.918	2.1804	0.313702	3.63842e-12
ENSGALG00000012442	MFNG	1	19.7006	2.17809	0.613807	0.000387448
ENSGALG00000011206	KITLG	1	82.7561	2.17727	0.347303	3.63233e-10
ENSGALG00000000295		26	88.18	2.17568	0.494675	1.09156e-05
ENSGALG00000033925		4	86.1894	2.17277	0.317444	7.66954e-12
ENSGALG00000037533		2	24.1624	2.17223	0.546742	7.09625e-05
ENSGALG00000029669	C1QC	21	56.6254	2.16832	0.488325	8.9821e-06
ENSGALG00000044225		4	53.9934	2.16728	0.536406	5.3365e-05
ENSGALG00000039553	SULF1	2	612.986	2.16501	0.327457	3.80179e-11
ENSGALG00000011200	THBS2	3	1883.71	2.16431	0.345631	3.80275e-10
ENSGALG00000015079	UPK1B	1	44.0891	2.16339	0.523802	3.62485e-05
ENSGALG00000012522	PVALB	1	767.875	2.16087	0.258913	7.0646e-17
ENSGALG00000013869	IL20RA	3	462.161	2.15983	0.283124	2.37426e-14
ENSGALG00000023444	APELA	4	46.9355	2.15647	0.443165	1.13841e-06
ENSGALG00000047591		13	60.3535	2.15587	0.438198	8.66126e-07
ENSGALG00000029056		Z	39.162	2.15263	0.42525	4.14787e-07
ENSGALG00000028284	PTX3	9	1348.67	2.15012	0.253692	2.3443e-17
ENSGALG00000007419	MASP1	9	13.6118	2.14174	0.771636	0.00551028
ENSGALG00000003751		6	11.4054	2.13872	0.746168	0.00415332
ENSGALG00000026862	CLDN1	9	66.1066	2.13667	0.545674	9.01598e-05
ENSGALG00000053416		2	79.3683	2.13576	0.455759	2.78382e-06
ENSGALG00000005293	GNG13	14	24.0519	2.1356	0.521641	4.23991e-05
ENSGALG00000029788	CCK	2	49.5668	2.13522	0.45294	2.42751e-06
ENSGALG00000011244	DLK1	5	58.3441	2.13319	0.487302	1.20016e-05
ENSGALG00000037493		5	651.285	2.13286	0.257252	1.12378e-16
ENSGALG00000028140	CNTFR	Z	88.9478	2.12888	0.373643	1.21489e-08
ENSGALG00000037675	COL14A1	2	981.458	2.12845	0.437353	1.13494e-06
ENSGALG00000048667		2	16.7332	2.12839	0.629689	0.000724671
ENSGALG00000010992	SLC6A15	1	357.36	2.12626	0.398047	9.2059e-08
ENSGALG00000031449	KCNV1	2	157.124	2.12502	0.316452	1.8788e-11
ENSGALG00000053941		17	20.0437	2.12498	0.629272	0.000733128
ENSGALG00000016744	GABRA5	1	35.0381	2.11966	0.523511	5.14503e-05
ENSGALG00000005672	SLC6A7	13	15.8545	2.11603	0.80804	0.00882605
ENSGALG00000007412	MPZL2	24	233.225	2.11354	0.232871	1.12592e-19
ENSGALG00000005630	CRYBB1	15	59.5145	2.1126	0.345105	9.26296e-10
ENSGALG00000006560	SEMA3A	1	2015.79	2.10724	0.198578	2.63149e-26
ENSGALG00000016945	LECT1	1	5200.51	2.09282	0.225093	1.43705e-20
ENSGALG00000048459	GAREM2	3	30.2432	2.08545	0.477662	1.2657e-05
ENSGALG00000006388	IL16	10	14.6099	2.08409	0.652778	0.00140974
ENSGALG00000008166	TLR15	3	13.0357	2.08015	0.777238	0.00744305
ENSGALG00000044449	LAG3	1	12.8703	2.0784	0.722263	0.00400681
ENSGALG00000020151	NMU	4	28.6074	2.07325	0.661727	0.00172975
ENSGALG00000017155	C11orf87	1	47.4212	2.0714	0.39316	1.37466e-07
ENSGALG00000004290	ANGPTL1	8	241.724	2.06686	0.291281	1.28625e-12
ENSGALG00000005747		4	17.735	2.05951	0.862762	0.0169815
ENSGALG00000009512	TFPI2	2	7310.5	2.0567	0.207722	4.11325e-23
ENSGALG00000037257	HLX	3	181.906	2.0549	0.404294	3.7214e-07
ENSGALG00000050611		2	162.259	2.05434	0.472904	1.39848e-05
ENSGALG00000055082		5	47.1884	2.05321	0.521208	8.17113e-05
ENSGALG00000012873	SERPINB5	2	39.8503	2.05227	0.635711	0.00124522
ENSGALG00000043386	PEX5L	9	26.845	2.05133	0.581152	0.000415932
ENSGALG00000009638	ANO6	1	733.878	2.04884	0.287861	1.09937e-12
ENSGALG00000054676		7	13.159	2.04536	0.698651	0.00341613
ENSGALG00000054848		Z	11.7169	2.04286	0.805152	0.0111732
ENSGALG00000042705	KCNK3	3	10.6078	2.03881	0.79847	0.0106678
ENSGALG00000044478		1	107.494	2.03731	0.337076	1.50285e-09
ENSGALG00000032978		1	51.9793	2.03378	0.54241	0.000177166
ENSGALG00000017040		1	23.1801	2.03244	0.617574	0.000998308
ENSGALG00000048481		1	27.8387	2.03238	0.517387	8.55983e-05
ENSGALG00000003138	OXTR	12	16.9209	2.02946	0.674166	0.00260971
ENSGALG00000010721	GLIS1	8	51.1365	2.02906	0.461465	1.09757e-05
ENSGALG00000000314	NEFL	22	925.405	2.02814	0.475039	1.95981e-05
ENSGALG00000006997	BRINP1	17	102.632	2.02779	0.318638	1.96663e-10
ENSGALG00000001028		19	15.7005	2.02582	0.747964	0.00675991
ENSGALG00000016448	KCNF1	3	110.244	2.02558	0.500985	5.27293e-05
ENSGALG00000035951		20	23.2216	2.01935	0.521164	0.000106757
ENSGALG00000041730	GPR20	2	115.234	2.01658	0.318381	2.39113e-10
ENSGALG00000015419	PENK	2	327.716	2.01581	0.354973	1.35665e-08
ENSGALG00000008716	FLRT3	3	1865.7	2.01158	0.282076	9.94081e-13
ENSGALG00000048940		19	25.9996	2.0111	0.558978	0.000320902
ENSGALG00000013006	ROPN1L	2	125.747	2.0109	0.42881	2.73903e-06
ENSGALG00000054431		2	109.367	2.01047	0.437958	4.42068e-06
ENSGALG00000010470	TCERG1L	6	31.1332	2.00569	0.59373	0.000729851
ENSGALG00000040761	DRD4	5	28.3326	2.00186	0.499651	6.16229e-05
ENSGALG00000028222		4	118.607	1.99908	0.304178	4.96261e-11
ENSGALG00000015737	NCAM2	1	141.22	1.99592	0.359138	2.73631e-08
ENSGALG00000012095		5	47.0616	1.99158	0.40239	7.44492e-07
ENSGALG00000005360	CA4	19	114.37	1.98972	0.444495	7.59255e-06
ENSGALG00000026373	KCNJ8	1	1470.88	1.98855	0.305774	7.85614e-11
ENSGALG00000045478		5	281.726	1.98477	0.224599	9.83559e-19
ENSGALG00000046715		Z	446.804	1.97984	0.374909	1.28586e-07
ENSGALG00000004476	SEMA3G	12	75.4685	1.97483	0.650921	0.0024141
ENSGALG00000049024	CD7	18	11.8547	1.97218	0.74949	0.00850422
ENSGALG00000040716	PRLH	7	83.6788	1.97069	0.364478	6.41324e-08
ENSGALG00000036043	TBX3	15	1090.12	1.97022	0.246365	1.2733e-15
ENSGALG00000048137		2	24.5384	1.96939	0.576713	0.000638172
ENSGALG00000042474	FOXD2	8	12.3419	1.95965	0.956097	0.0404
ENSGALG00000050807		6	111.65	1.95573	0.33401	4.76202e-09
ENSGALG00000023640	RSPO4	20	19.5851	1.95554	0.615194	0.00147915
ENSGALG00000007993	DCX	4	437.64	1.95434	0.259958	5.56573e-14
ENSGALG00000004209	ELFN1	14	69.3372	1.95114	0.533023	0.000251712
ENSGALG00000008757	CNRIP1	3	35.1922	1.95113	0.477374	4.36569e-05
ENSGALG00000002335	DOCK3	12	41.4576	1.95008	0.43045	5.88936e-06
ENSGALG00000052336		2	94.2622	1.94702	0.294754	3.95953e-11
ENSGALG00000010770	SCIN	2	66.7299	1.94243	0.347861	2.35172e-08
ENSGALG00000049436		33	46.9759	1.9398	0.390743	6.89135e-07
ENSGALG00000033183	GABRQ	4	19.5999	1.93834	0.71669	0.00683932
ENSGALG00000027788	CPE	4	8112.69	1.93815	0.197653	1.06255e-22
ENSGALG00000043223	COL26A1	19	3647.72	1.9357	0.257732	5.89031e-14
ENSGALG00000041263	DCLK1	1	277.944	1.92981	0.318605	1.38636e-09
ENSGALG00000003767	NKD1	11	517.43	1.92954	0.202334	1.47902e-21
ENSGALG00000017228	MTNR1B	1	10.7163	1.92909	0.840254	0.0216851
ENSGALG00000025774	HOXB2	27	344.301	1.92856	0.271335	1.18037e-12
ENSGALG00000049050		18	18.28	1.92726	0.832845	0.0206641
ENSGALG00000049551		19	17.9034	1.92716	0.66364	0.0036852
ENSGALG00000006368	PTPN5	5	16.636	1.926	0.733575	0.00865228
ENSGALG00000050441		1	19.915	1.92564	0.667468	0.00391417
ENSGALG00000017106	ATP8A2	1	148.086	1.92177	0.361215	1.03601e-07
ENSGALG00000048035	GCNT2	2	13.4363	1.92013	0.672545	0.00430333
ENSGALG00000016908		1	39.3939	1.9187	0.427554	7.20203e-06
ENSGALG00000054598		1	36.3865	1.91715	0.418605	4.65317e-06
ENSGALG00000037856	CHL1	12	80.3874	1.91391	0.488178	8.83568e-05
ENSGALG00000000667	EDN2	23	286.708	1.91389	0.221616	5.81792e-18
ENSGALG00000037521	PRCP	1	2160.2	1.9117	0.218413	2.08318e-18
ENSGALG00000034111	FOXF1	11	11.7329	1.91009	0.82203	0.0201458
ENSGALG00000001764	HCN4	10	1217.99	1.90674	0.320212	2.60682e-09
ENSGALG00000012886		2	12.7619	1.90593	0.672265	0.00458138
ENSGALG00000012292	BANK1	4	18.2378	1.90286	0.628855	0.00247883
ENSGALG00000024449	RAMP2	27	670.526	1.89921	0.238549	1.69973e-15
ENSGALG00000023781	TREM2	26	97.9207	1.8964	0.336809	1.79703e-08
ENSGALG00000003744	ADAM19	13	62.5347	1.89544	0.556087	0.000653148
ENSGALG00000002182	NR5A2	8	20.5802	1.89515	0.609827	0.00188562
ENSGALG00000002455	LRRTM2	13	44.9627	1.89203	0.494662	0.000130824
ENSGALG00000026584		5	31.8484	1.8885	0.644529	0.00338913
ENSGALG00000007868	BCO2	24	64.0224	1.88661	0.348608	6.23841e-08
ENSGALG00000012594	NTRK2	Z	235.206	1.88326	0.263672	9.16872e-13
ENSGALG00000030151	LUZP2	5	118.15	1.88292	0.447791	2.61187e-05
ENSGALG00000010044	KCNMB4	1	66.6713	1.88083	0.424899	9.57616e-06
ENSGALG00000006482	FAH	10	41.3687	1.88044	0.767563	0.0142904
ENSGALG00000040249	BHLHE22	2	29.1786	1.88011	0.672903	0.00520562
ENSGALG00000047567		33	17.6389	1.87924	0.696915	0.00700691
ENSGALG00000009458		9	1191.05	1.87758	0.335299	2.14708e-08
ENSGALG00000034109	GRIA3	4	359.978	1.8727	0.375246	6.01901e-07
ENSGALG00000049529		1	74.032	1.87152	0.536923	0.000490969
ENSGALG00000041103	SLC18A3	6	109.447	1.86692	0.426782	1.21759e-05
ENSGALG00000011544	BCL2L14	1	21.5159	1.86669	0.661387	0.00476678
ENSGALG00000008465	SORCS1	6	233.357	1.86664	0.361279	2.38195e-07
ENSGALG00000030030	RSPO2	2	134.668	1.86575	0.271549	6.38547e-12
ENSGALG00000027765		2	48.6408	1.86414	0.393361	2.14772e-06
ENSGALG00000042511	PKDCC	3	649.795	1.85826	0.295332	3.13196e-10
ENSGALG00000040136	PSTPIP2	Z	42.0382	1.856	0.476318	9.75692e-05
ENSGALG00000016138	DSCAM	1	33.9089	1.85538	0.677208	0.00614871
ENSGALG00000002987	SERPINF2	19	45.01	1.84607	0.841035	0.0281634
ENSGALG00000039245	STAB2	1	317.061	1.84554	0.933925	0.0481424
ENSGALG00000014485	LDB2	4	1413.15	1.84506	0.205133	2.37351e-19
ENSGALG00000038634	KIT	4	59.7456	1.84416	0.361332	3.32946e-07
ENSGALG00000008885	PDE1A	7	57.8253	1.84102	0.433495	2.16732e-05
ENSGALG00000029862		3	639.857	1.8397	0.229274	1.0236e-15
ENSGALG00000003655	GAS2	5	454.22	1.83919	0.308237	2.41955e-09
ENSGALG00000008615		5	141.907	1.83825	0.449418	4.30826e-05
ENSGALG00000011080	BDKRB2	5	30.1497	1.83786	0.563942	0.00111825
ENSGALG00000008193	RELN	1	1161.51	1.83689	0.418617	1.14398e-05
ENSGALG00000044326		31	38.9547	1.83576	0.428779	1.85754e-05
ENSGALG00000024031	CYB561	27	24.7076	1.83533	0.589442	0.00184776
ENSGALG00000053697	TMEM125	8	37.3676	1.83451	0.56963	0.0012795
ENSGALG00000052574		6	13.2011	1.83314	0.652622	0.00497126
ENSGALG00000010958	PPFIA2	1	86.9061	1.82886	0.457011	6.28649e-05
ENSGALG00000030251	ADCY8	2	89.5331	1.82504	0.4757	0.000124784
ENSGALG00000010311	NAV3	1	567.349	1.82312	0.407818	7.80675e-06
ENSGALG00000026214	LRTM2	1	79.385	1.82203	0.514127	0.000394219
ENSGALG00000050002	COLEC11	3	698.448	1.82151	0.257487	1.50317e-12
ENSGALG00000032584	ALX4	5	38.3742	1.82086	0.650519	0.00512458
ENSGALG00000043734	LIPG	Z	27.1521	1.8179	0.535986	0.000694643
ENSGALG00000011961	TNIP3	4	11.3916	1.81491	0.835951	0.0299256
ENSGALG00000020906		19	10.2302	1.81293	0.768799	0.0183673
ENSGALG00000026422		7	100.662	1.81276	0.306601	3.371e-09
ENSGALG00000005616	ARSI	13	186.334	1.81161	0.260873	3.80057e-12
ENSGALG00000028031	C1QL1	27	33.215	1.81014	0.472443	0.00012739
ENSGALG00000002955	ADAMTSL2	17	644.63	1.80968	0.281293	1.24755e-10
ENSGALG00000012802	F13A1	2	255.894	1.80925	0.363545	6.46841e-07
ENSGALG00000043035	SHISA2	1	11342.8	1.80637	0.331566	5.09439e-08
ENSGALG00000004141	LBFABP	23	21.5011	1.80322	0.568462	0.0015134
ENSGALG00000020626		9	2367.39	1.8026	0.199991	1.99786e-19
ENSGALG00000030719	CLMN	5	337.609	1.8014	0.374979	1.55532e-06
ENSGALG00000012834	AKR1D1	1	2201.16	1.80068	0.392733	4.53987e-06
ENSGALG00000015198	NOL4	2	33.5712	1.80034	0.518077	0.000510764
ENSGALG00000044207	REC114	10	13.1616	1.79968	0.70095	0.0102437
ENSGALG00000012956	TMTC1	1	799.875	1.79936	0.281253	1.57753e-10
ENSGALG00000046693		2	125.979	1.79495	0.415542	1.5636e-05
ENSGALG00000007929	DIXDC1	24	1236.28	1.79306	0.245385	2.72908e-13
ENSGALG00000034741	ETNPPL	4	35.4632	1.78449	0.499742	0.00035585
ENSGALG00000042443		2	635.692	1.78191	0.345103	2.42482e-07
ENSGALG00000044632	PLIN3	28	221.019	1.7815	0.260873	8.55014e-12
ENSGALG00000017274	CD9	1	491.073	1.78031	0.203424	2.10133e-18
ENSGALG00000033974	HGF	1	92.055	1.76882	0.360784	9.45244e-07
ENSGALG00000001442	OPCML	24	227.388	1.76783	0.277669	1.9315e-10
ENSGALG00000036847	PLAC9	6	470.586	1.76465	0.245095	6.02808e-13
ENSGALG00000016725	OPN5	3	78.3022	1.76217	0.437307	5.58717e-05
ENSGALG00000054262	ITPRID1	2	41.7882	1.75955	0.446633	8.16183e-05
ENSGALG00000016375	PHEX	1	52.324	1.75942	0.596524	0.00318342
ENSGALG00000013212		2	109.062	1.75695	0.280351	3.68111e-10
ENSGALG00000026372	MANSC4	1	24.7936	1.7548	0.798726	0.0280202
ENSGALG00000033597		17	87.9454	1.75232	0.450859	0.000101651
ENSGALG00000024136		25	67.0378	1.75184	0.478135	0.000248399
ENSGALG00000034438	GNB3	1	29.9555	1.75082	0.460802	0.000144993
ENSGALG00000002312	TMEM132E	19	118.356	1.74801	0.304521	9.45615e-09
ENSGALG00000040866	P3H2	9	280.914	1.74786	0.291799	2.09919e-09
ENSGALG00000052184		2	804.731	1.74768	0.26345	3.27073e-11
ENSGALG00000032887	CHIR-B3	31	12.2763	1.74387	0.676986	0.00999693
ENSGALG00000048578		4	10.5906	1.74374	0.808488	0.0310223
ENSGALG00000031350	KCNE4	9	140.973	1.74362	0.356934	1.03433e-06
ENSGALG00000020985		9	32.9163	1.74194	0.447701	9.98914e-05
ENSGALG00000031274	SLC4A8	33	241.769	1.74161	0.224397	8.40648e-15
ENSGALG00000005842	GDPD2	4	42.3249	1.73543	0.394963	1.1133e-05
ENSGALG00000047221		4	33.0169	1.73202	0.50117	0.000548361
ENSGALG00000040993	BAMBI	2	3326.89	1.73045	0.253428	8.59945e-12
ENSGALG00000029509	NECAB1	2	392.29	1.72911	0.346482	6.0233e-07
ENSGALG00000050440		33	38.5849	1.72768	0.44799	0.000115013
ENSGALG00000053135		1	73.8094	1.72716	0.443608	9.8835e-05
ENSGALG00000021569	C1QA	21	75.5897	1.7243	0.438273	8.34348e-05
ENSGALG00000000695	MFSD4A	26	76.9424	1.72197	0.451803	0.00013822
ENSGALG00000006882	ST8SIA2	10	413.212	1.72098	0.265268	8.71583e-11
ENSGALG00000003716	GDNF	Z	20.842	1.71742	0.547206	0.001698
ENSGALG00000037164	ZFHX4	2	979.946	1.71677	0.45688	0.000171559
ENSGALG00000024083	TCIM	22	632.012	1.71483	0.354406	1.30744e-06
ENSGALG00000054048		19	668.914	1.71282	0.223143	1.64265e-14
ENSGALG00000053164		2	75.7309	1.71227	0.504066	0.000681485
ENSGALG00000033144	COLEC10	2	506.092	1.70984	0.322193	1.11514e-07
ENSGALG00000001933	CORO2A	Z	249.285	1.7045	0.3606	2.2804e-06
ENSGALG00000035916	SHANK2	5	40.3613	1.70272	0.629305	0.00681567
ENSGALG00000052636		11	12.5989	1.69999	0.755777	0.0244912
ENSGALG00000015253	COL8A1	1	79.3619	1.69884	0.42902	7.50095e-05
ENSGALG00000036780		3	77.9739	1.69568	0.424498	6.48184e-05
ENSGALG00000037387	CLSTN2	9	146.274	1.69375	0.414733	4.42757e-05
ENSGALG00000020703	GRB14	7	112.674	1.6882	0.268957	3.45509e-10
ENSGALG00000003560	SLC6A2	11	56.1354	1.683	0.482882	0.000491533
ENSGALG00000026572	RGS5	8	443.355	1.68273	0.289098	5.8626e-09
ENSGALG00000054460		7	11.5861	1.68071	0.692876	0.0152786
ENSGALG00000005992	PDE8A	10	510.367	1.67803	0.28496	3.89362e-09
ENSGALG00000013616	OPRM1	3	26.51	1.67799	0.490641	0.000626247
ENSGALG00000007623	CACNA1G	18	784.154	1.67561	0.333179	4.92619e-07
ENSGALG00000054607		9	27.1365	1.67558	0.622723	0.00712971
ENSGALG00000053674		2	20.4319	1.67337	0.636082	0.00851993
ENSGALG00000036824	CDH23	6	50.8765	1.67073	0.479656	0.000495477
ENSGALG00000005572	NOXO1	14	18.514	1.66951	0.630603	0.00810923
ENSGALG00000013097	SLC15A5	1	23.2807	1.66858	0.636609	0.00876608
ENSGALG00000032746	ENPP2	2	1207.26	1.6684	0.285352	5.01116e-09
ENSGALG00000044151		17	79.5081	1.66744	0.309341	7.03445e-08
ENSGALG00000020386	BDKRB1	5	36.1328	1.66446	0.546342	0.0023148
ENSGALG00000001894		21	26.246	1.66247	0.552042	0.00259964
ENSGALG00000008996	ANKEF1	3	47.6776	1.66235	0.378145	1.1023e-05
ENSGALG00000049507		11	16.1105	1.66196	0.583432	0.0043914
ENSGALG00000053526	NTF3	1	459.9	1.66167	0.2459	1.4038e-11
ENSGALG00000005763	VILL	2	132.771	1.65985	0.429352	0.000110664
ENSGALG00000034899	NKAIN3	2	62.3862	1.65722	0.352985	2.66772e-06
ENSGALG00000016287	NR0B1	1	227.255	1.65652	0.442644	0.000182329
ENSGALG00000052853		KZ626838.1	35.3655	1.65309	0.534814	0.00199515
ENSGALG00000008918	LAMP5	3	242.03	1.65031	0.215835	2.07076e-14
ENSGALG00000054898		4	34.8267	1.6467	0.561559	0.00336394
ENSGALG00000005094	GRAPL	14	62.9756	1.64603	0.390791	2.53057e-05
ENSGALG00000013697	CNDP1	2	196.743	1.64495	0.241853	1.03588e-11
ENSGALG00000007211	CDH22	20	466.011	1.64272	0.784823	0.0363393
ENSGALG00000021884		28	31.597	1.64167	0.460673	0.000365767
ENSGALG00000039536	C2H8ORF22	2	76.1058	1.64043	0.331495	7.47494e-07
ENSGALG00000009730	SLC38A4	1	22.5664	1.64028	0.689931	0.0174327
ENSGALG00000014835	C7	Z	2019.22	1.63915	0.215396	2.74215e-14
ENSGALG00000053130	MYOZ3	13	29.8848	1.63682	0.505521	0.00120416
ENSGALG00000015838	MRAP2	3	49.9483	1.63349	0.422723	0.000111455
ENSGALG00000026836		23	736.236	1.6315	0.369754	1.02235e-05
ENSGALG00000042159	SLITRK3	9	51.4287	1.63083	0.412828	7.80282e-05
ENSGALG00000013218	C3AR1	1	77.581	1.62792	0.431577	0.000161931
ENSGALG00000010139	SSTR1	5	29.1547	1.62684	0.522027	0.00183083
ENSGALG00000007324	TP63	9	26.1296	1.62153	0.490741	0.000952344
ENSGALG00000001252	CREB3L3	28	18.8956	1.62075	0.714402	0.0232882
ENSGALG00000011093	AK7	5	18.7464	1.62059	0.592838	0.00626445
ENSGALG00000008734	PCSK2	3	1051.14	1.62029	0.188186	7.30414e-18
ENSGALG00000039209	WIF1	1	48.9317	1.61923	0.485813	0.000859062
ENSGALG00000042446	ACSM5	14	14.5407	1.61791	0.622801	0.00938227
ENSGALG00000026153	FOXO6	23	118.74	1.61571	0.293923	3.86157e-08
ENSGALG00000016809	EDAR	1	39.8157	1.60942	0.428071	0.000170114
ENSGALG00000041826	S100A6	25	241.663	1.60645	0.287233	2.23346e-08
ENSGALG00000044226		30	24.8667	1.60624	0.490842	0.00106631
ENSGALG00000046817		8	191.267	1.60426	0.315646	3.72561e-07
ENSGALG00000007955	SLC16A5	18	16.2554	1.60297	0.623069	0.0100909
ENSGALG00000019489	CHST9	2	188.734	1.60171	0.370472	1.53625e-05
ENSGALG00000046616	CHGB	3	4049.91	1.60061	0.292443	4.41854e-08
ENSGALG00000042607	RSPO3	3	823.373	1.59919	0.463607	0.000561737
ENSGALG00000010204	KCNC2	1	56.1066	1.5969	0.352818	6.00699e-06
ENSGALG00000031693	KCNB2	2	67.1046	1.59679	0.319277	5.69545e-07
ENSGALG00000004893	TMEM119	15	481.896	1.59448	0.302054	1.30027e-07
ENSGALG00000041054		4	489.975	1.59163	0.352051	6.15436e-06
ENSGALG00000009902	CFAP57	8	34.1502	1.58911	0.492823	0.00126193
ENSGALG00000054272		14	32.8664	1.58805	0.525275	0.00250054
ENSGALG00000045115		30	79.9496	1.58717	0.355854	8.18872e-06
ENSGALG00000016176	ADGRB3	3	28.8957	1.58624	0.471653	0.000770571
ENSGALG00000016628	NLGN4Y	1	368.741	1.58491	0.244316	8.74908e-11
ENSGALG00000030602	ADAM33	4	1414.33	1.58274	0.244665	9.86647e-11
ENSGALG00000018942	NRGN	24	98.717	1.57667	0.43509	0.000290322
ENSGALG00000036220		17	13.1157	1.57323	0.678611	0.0204327
ENSGALG00000010049	PTPRB	1	1095.44	1.57118	0.318402	8.03288e-07
ENSGALG00000007732	RTN4R	15	97.6543	1.57065	0.328252	1.71077e-06
ENSGALG00000049871		2	357.353	1.57062	0.431322	0.000271152
ENSGALG00000004528	TSHZ3	11	265.962	1.56905	0.253666	6.19098e-10
ENSGALG00000001124	LHX2	17	19.3043	1.56798	0.681923	0.0214851
ENSGALG00000009012	ZNF385B	7	90.8153	1.56654	0.388508	5.52597e-05
ENSGALG00000015126	TRPM3	Z	74.8535	1.56444	0.461986	0.000708337
ENSGALG00000051434		3	86.8707	1.56365	0.370289	2.41309e-05
ENSGALG00000047283		31	92.9976	1.56328	0.325225	1.53388e-06
ENSGALG00000011740	MGP	1	38.6614	1.56313	0.429131	0.000269964
ENSGALG00000033638	SLC26A7	2	11.3637	1.56199	0.787827	0.0474057
ENSGALG00000007314	DSCAML1	24	32.6003	1.5617	0.44126	0.000401382
ENSGALG00000041524		2	23.4626	1.56131	0.524755	0.00292692
ENSGALG00000047514		11	66.0416	1.56019	0.413818	0.000163097
ENSGALG00000012076	TIFA	4	49.1617	1.55768	0.380834	4.31013e-05
ENSGALG00000051854		1	93.7964	1.55732	0.30655	3.77122e-07
ENSGALG00000012906	CDH20	2	54.438	1.55657	0.408014	0.000136186
ENSGALG00000006575	VIPR2	2	36.9904	1.55621	0.463266	0.000781648
ENSGALG00000016575	GPM6B	1	1656.36	1.55215	0.221568	2.46459e-12
ENSGALG00000051849		10	60.0496	1.55202	0.35288	1.09182e-05
ENSGALG00000007007		6	80.618	1.55076	0.354128	1.19181e-05
ENSGALG00000005502	KCNG4	11	111.619	1.54954	0.372381	3.16642e-05
ENSGALG00000046789		W	29.4487	1.54906	0.572046	0.00677032
ENSGALG00000052663		9	28.2852	1.54623	0.660352	0.0192054
ENSGALG00000016661	BLK	3	60.8674	1.54279	0.355015	1.38832e-05
ENSGALG00000012755	IGF-I	1	20.8363	1.54159	0.655981	0.018771
ENSGALG00000010738	TC2N	5	35.3132	1.53587	0.455247	0.000741629
ENSGALG00000016969		1	57.8344	1.53536	0.366818	2.84404e-05
ENSGALG00000015799	ELAVL2	Z	11.9444	1.53158	0.722034	0.0339043
ENSGALG00000052407		1	18.6574	1.52862	0.561694	0.00649972
ENSGALG00000032518	NCALD	2	566.389	1.52861	0.181633	3.89883e-17
ENSGALG00000009652	USH2A	3	358.163	1.52838	0.406163	0.000167907
ENSGALG00000009523	CNTN1	1	218.305	1.52769	0.26628	9.62794e-09
ENSGALG00000047550		28	255.866	1.52721	0.287625	1.09796e-07
ENSGALG00000048429		10	73.3783	1.52447	0.331964	4.38441e-06
ENSGALG00000014845	PLCXD3	Z	38.9117	1.52226	0.427137	0.00036543
ENSGALG00000031615	FAIM2	33	183.815	1.51962	0.276384	3.8366e-08
ENSGALG00000029416	TRPC6	1	623.12	1.51876	0.289875	1.61122e-07
ENSGALG00000049807		1	66.0216	1.51803	0.35489	1.89023e-05
ENSGALG00000026991		W	40.2563	1.51583	0.438697	0.000549695
ENSGALG00000051828		Z	14.8609	1.51404	0.753213	0.0444203
ENSGALG00000053909		5	87.0538	1.51397	0.337952	7.4703e-06
ENSGALG00000028304	MMR1L4	2	129.357	1.51271	0.289193	1.68787e-07
ENSGALG00000031205	GNGT2	27	37.2708	1.51076	0.427575	0.000410366
ENSGALG00000004386	SOX9	18	100.559	1.50939	0.453059	0.000863587
ENSGALG00000052054		3	16.5677	1.50276	0.625872	0.0163477
ENSGALG00000001527	VWA1	21	334.561	1.50263	0.198534	3.77175e-14
ENSGALG00000011708	MYLK	7	5729.29	1.49935	0.232011	1.03048e-10
ENSGALG00000053434		5	188.773	1.49897	0.262045	1.06339e-08
ENSGALG00000007356	MAP3K8	2	43.3027	1.49756	0.37566	6.706e-05
ENSGALG00000009601	NELL2	1	1033.22	1.49655	0.263782	1.39955e-08
ENSGALG00000014686	FBN2	Z	2515.99	1.49654	0.425568	0.00043714
ENSGALG00000014386	SEPSECS	4	10102.1	1.49534	0.20324	1.87381e-13
ENSGALG00000038747	TM4SF18	9	491.258	1.4935	0.190228	4.12335e-15
ENSGALG00000016564	PTK2B	3	33.0131	1.49342	0.453563	0.000992486
ENSGALG00000023581	UTS2R	18	79.9208	1.49208	0.322407	3.69351e-06
ENSGALG00000006175	DPEP1	11	27.3942	1.49189	0.540934	0.00581581
ENSGALG00000028376	FGF19	5	20.3366	1.49113	0.525705	0.00456193
ENSGALG00000032352		20	14.4892	1.49087	0.670274	0.0261308
ENSGALG00000052119		2	18.328	1.49023	0.63151	0.0182853
ENSGALG00000052653	PCDHAC1	13	51.1753	1.48986	0.389063	0.000128479
ENSGALG00000006864		8	791.334	1.48918	0.325648	4.8082e-06
ENSGALG00000006681	BRSK1	5	25.6237	1.48891	0.470325	0.0015471
ENSGALG00000008018	SNAI1	20	1516.23	1.48523	0.237615	4.08936e-10
ENSGALG00000047872		Z	10.505	1.48278	0.745835	0.0468025
ENSGALG00000045938	RBBP8NL	20	635.648	1.481	0.215172	5.86618e-12
ENSGALG00000015627	HAPLN1	Z	93.3145	1.4802	0.365422	5.1071e-05
ENSGALG00000009239	TLR2B	4	14.3503	1.47955	0.641793	0.0211478
ENSGALG00000037194		3	36.476	1.47789	0.414214	0.000359811
ENSGALG00000000059	TUBB3	11	490.839	1.47673	0.467288	0.00157655
ENSGALG00000008309		1	16.3782	1.47608	0.62486	0.0181643
ENSGALG00000009803	MGST2	4	17.6425	1.47197	0.647679	0.0230457
ENSGALG00000007001	TLR4	17	107.775	1.46962	0.326681	6.83916e-06
ENSGALG00000016998	LPAR6	1	156.563	1.46867	0.233595	3.23184e-10
ENSGALG00000012045		7	30.4491	1.46833	0.464063	0.00155575
ENSGALG00000052085		8	32.9512	1.46678	0.584664	0.0121157
ENSGALG00000001416	ADRA1B	13	27.8054	1.46669	0.474987	0.0020161
ENSGALG00000005180		8	601.436	1.46136	0.337518	1.49289e-05
ENSGALG00000010598	KCNK10	5	24.9337	1.46111	0.50302	0.00367625
ENSGALG00000027853	CTNNA2	4	941.44	1.46071	0.198159	1.68856e-13
ENSGALG00000054770	INHA	7	713.413	1.45614	0.260826	2.36666e-08
ENSGALG00000054999		23	266.992	1.45559	0.424042	0.000597684
ENSGALG00000049282		3	14.7768	1.45521	0.588554	0.0134163
ENSGALG00000035317	ID3	23	6849.64	1.45351	0.240426	1.48911e-09
ENSGALG00000052027		1	49.3752	1.45295	0.484827	0.00272798
ENSGALG00000011994	SYNPO2	4	368.259	1.45064	0.28603	3.94451e-07
ENSGALG00000013993	VNN1	3	73.1927	1.45035	0.408836	0.000388874
ENSGALG00000005628	COL9A3	20	192.828	1.4496	0.515377	0.00491266
ENSGALG00000011347	IHH	7	28.4536	1.44875	0.501699	0.0038808
ENSGALG00000050072	EMID1	15	154.477	1.44839	0.307994	2.56812e-06
ENSGALG00000043106	WDR17	4	39.4972	1.44812	0.587341	0.0136803
ENSGALG00000034078	GLT8D2	1	245.845	1.4475	0.332983	1.37967e-05
ENSGALG00000006717		5	10.539	1.44599	0.726909	0.0466763
ENSGALG00000039822	RASSF10	5	113.626	1.44494	0.302299	1.75436e-06
ENSGALG00000032882	EVA1C	1	145.466	1.44378	0.265926	5.65863e-08
ENSGALG00000031776	NFASC	26	144.362	1.44262	0.339038	2.09025e-05
ENSGALG00000036075		13	19.3419	1.44218	0.581759	0.0131751
ENSGALG00000010950	PPP4R4	5	420.946	1.44056	0.196531	2.30241e-13
ENSGALG00000041750	ADAMTS9	12	1248.31	1.44056	0.296406	1.1734e-06
ENSGALG00000052159		28	70.622	1.4372	0.461	0.0018235
ENSGALG00000001690	GABRB2	13	55.299	1.4371	0.388798	0.000218792
ENSGALG00000000357		22	66.9285	1.43706	0.311346	3.91882e-06
ENSGALG00000017169	ELMOD1	1	1167.77	1.43637	0.272564	1.36554e-07
ENSGALG00000010125	CSGALNACT1	4	163.502	1.43448	0.290206	7.69375e-07
ENSGALG00000046160		4	42.2979	1.43087	0.437644	0.00107748
ENSGALG00000036258	PCDH8	1	679.423	1.42866	0.255124	2.14523e-08
ENSGALG00000043052	CD1B	16	41.3132	1.42804	0.4041	0.000409512
ENSGALG00000054822		11	55.0993	1.42666	0.365775	9.60404e-05
ENSGALG00000006072		2	21.6339	1.42639	0.656022	0.0296824
ENSGALG00000040348	EHBP1	3	5092.99	1.42629	0.189273	4.85973e-14
ENSGALG00000004903	CHST8	11	140.705	1.42506	0.42307	0.000756139
ENSGALG00000052282		Z	71.7602	1.42135	0.467595	0.00236808
ENSGALG00000011581	KIF26A	5	3484.19	1.42103	0.249499	1.23003e-08
ENSGALG00000048343		11	138.567	1.41989	0.247451	9.57603e-09
ENSGALG00000048624	SGPP2	9	39.8133	1.4197	0.498378	0.00439074
ENSGALG00000050709		2	22.0991	1.41763	0.511829	0.00561027
ENSGALG00000028709	RNF144A	3	59.8086	1.4127	0.347916	4.89771e-05
ENSGALG00000004974	PPARG	12	63.964	1.41095	0.324689	1.38927e-05
ENSGALG00000050137		9	21.8	1.41083	0.640983	0.0277336
ENSGALG00000038515	LFNG	14	1622.43	1.41033	0.217412	8.76042e-11
ENSGALG00000038141	NCF4	1	48.5896	1.40897	0.458911	0.00213879
ENSGALG00000055067		1	28.0485	1.40742	0.644105	0.0288825
ENSGALG00000038920		1	29.2138	1.40628	0.507919	0.00562802
ENSGALG00000001935		21	18.5816	1.40512	0.635134	0.0269445
ENSGALG00000001031		19	20.9555	1.40362	0.658522	0.0330508
ENSGALG00000025822	CYP1B1	3	7480.98	1.40328	0.188086	8.59574e-14
ENSGALG00000032108	TMEM136-1	24	29.7428	1.40324	0.595651	0.018482
ENSGALG00000034661	ID1	20	2512.62	1.40283	0.269584	1.95364e-07
ENSGALG00000009429	RXFP1	4	50.0231	1.40273	0.410779	0.000638268
ENSGALG00000033561	DGKB	2	33.0615	1.40252	0.496423	0.00472444
ENSGALG00000051001		3	144.853	1.40239	0.445099	0.00162855
ENSGALG00000007996	ANKRD44	7	2279.59	1.40237	0.219452	1.65515e-10
ENSGALG00000048751		28	24.1034	1.40005	0.49118	0.00436674
ENSGALG00000010331	MME	9	327.006	1.39978	0.199531	2.29345e-12
ENSGALG00000011252		7	2215.95	1.39963	0.187698	8.86398e-14
ENSGALG00000000619	ANGPTL4	28	1107.97	1.39958	0.317751	1.05951e-05
ENSGALG00000035690	RAPGEFL1	27	17.3005	1.39911	0.585084	0.016789
ENSGALG00000043219	HOXB3	27	873.197	1.39874	0.202026	4.40424e-12
ENSGALG00000043690	ECRG4	1	1198.24	1.3978	0.299904	3.14938e-06
ENSGALG00000052020	AvBD14	3	23.5928	1.39674	0.534913	0.00902393
ENSGALG00000007358	CILP	10	72.3024	1.3958	0.543267	0.0101911
ENSGALG00000046032	CD83	2	76.8195	1.39521	0.312876	8.22226e-06
ENSGALG00000015193	CCDC80	1	8098.17	1.39485	0.166484	5.36989e-17
ENSGALG00000037366	GRID1	6	205.669	1.39432	0.286766	1.1607e-06
ENSGALG00000015117	DRD3	1	98.5828	1.39306	0.334591	3.13453e-05
ENSGALG00000047472		1	62.4147	1.39224	0.596032	0.019499
ENSGALG00000045754		6	23.1919	1.38852	0.570993	0.0150259
ENSGALG00000032784		7	65.7842	1.38782	0.500798	0.00558473
ENSGALG00000039334		5	265.36	1.38774	0.268112	2.26744e-07
ENSGALG00000053121		19	47.8141	1.38735	0.369489	0.000173491
ENSGALG00000038393	DMB2	16	64.6145	1.38721	0.436302	0.0014754
ENSGALG00000026945	CIDEC	11	623.507	1.3865	0.291425	1.95838e-06
ENSGALG00000009499	NPY5R	4	167.616	1.38244	0.27064	3.25521e-07
ENSGALG00000029151	ISLR2	10	434.124	1.38084	0.203197	1.07883e-11
ENSGALG00000004729	SLC7A10	11	24.606	1.3799	0.470928	0.00338766
ENSGALG00000030728		3	62.9353	1.37932	0.339595	4.87252e-05
ENSGALG00000006891	ITIH5	1	244.229	1.37867	0.417575	0.000961294
ENSGALG00000008704	CUBN	2	991.996	1.37755	0.398649	0.0005492
ENSGALG00000048415		5	23.7335	1.37742	0.551013	0.0124265
ENSGALG00000028147	CTSK	25	1036.17	1.37737	0.270932	3.69895e-07
ENSGALG00000028466		11	23.1921	1.3772	0.609286	0.0237993
ENSGALG00000050840	APCDD1	2	1012.02	1.37604	0.300832	4.78232e-06
ENSGALG00000015685	CFAP99	4	89.8186	1.37428	0.334062	3.89088e-05
ENSGALG00000033471	CALD1	1	5859.72	1.37364	0.214393	1.48266e-10
ENSGALG00000048024		17	208.808	1.37254	0.36473	0.000167773
ENSGALG00000053595	CXXC4	4	109.256	1.37052	0.313744	1.25233e-05
ENSGALG00000021017	DUSP15	20	136.393	1.36996	0.249408	3.95538e-08
ENSGALG00000050287		3	118.366	1.36837	0.256933	1.00527e-07
ENSGALG00000012941		2	45.4154	1.36721	0.474839	0.00398538
ENSGALG00000016884	SLC15A1	1	19.4953	1.36688	0.555026	0.0137882
ENSGALG00000051160		3	78.5089	1.36649	0.392107	0.000492153
ENSGALG00000016590	TLR7	1	39.3686	1.36599	0.424875	0.00130428
ENSGALG00000048815		1	12.7807	1.3628	0.693083	0.0492656
ENSGALG00000004662	DISP3	21	203.484	1.35875	0.353283	0.000120025
ENSGALG00000040923		17	30.5424	1.35797	0.446892	0.00237596
ENSGALG00000051889		4	73.9462	1.35781	0.438822	0.00197342
ENSGALG00000030781	CA2	2	1277.71	1.35357	0.405806	0.000851421
ENSGALG00000001561	MXRA8	21	1878.59	1.35172	0.233481	7.06247e-09
ENSGALG00000007038	ASTN2	17	746.357	1.34485	0.197183	9.08441e-12
ENSGALG00000030237	PITX1	13	12.3736	1.34333	0.678551	0.0477365
ENSGALG00000043044	IL1R1	1	835.402	1.34195	0.229562	5.04526e-09
ENSGALG00000008651	APMAP	3	1813.15	1.34138	0.17105	4.43198e-15
ENSGALG00000009530	PDZRN4	1	1521.61	1.34022	0.210622	1.97615e-10
ENSGALG00000012100	CFAP221	7	35.3706	1.3377	0.495363	0.00692487
ENSGALG00000015271		1	3760.73	1.33642	0.197157	1.21462e-11
ENSGALG00000014267	RBM47	4	42.0402	1.33595	0.389467	0.000603133
ENSGALG00000041791	DPP6	2	224.964	1.3342	0.366632	0.000273629
ENSGALG00000016325	GSTA3	3	385.839	1.33371	0.318986	2.90103e-05
ENSGALG00000014268	CHRNA9	4	135.669	1.3316	0.27111	9.03105e-07
ENSGALG00000030647	MFAP2	21	2575.55	1.32894	0.244101	5.2031e-08
ENSGALG00000001740	MGAT5B	18	72.1713	1.32749	0.351417	0.000158399
ENSGALG00000051174		KZ626838.1	37.1667	1.32707	0.522921	0.0111552
ENSGALG00000037200		3	2010.33	1.32678	0.220788	1.86328e-09
ENSGALG00000051748	NTMT2	8	368.844	1.32644	0.237717	2.40627e-08
ENSGALG00000047297	PROK1	26	49.715	1.3245	0.396149	0.000827462
ENSGALG00000012593	SLC28A3	Z	167.469	1.32042	0.309816	2.02633e-05
ENSGALG00000012055		7	454.955	1.31794	0.274694	1.60395e-06
ENSGALG00000015531	PPP2R2C	4	63.9557	1.3173	0.35018	0.0001687
ENSGALG00000047499		Z	17.7144	1.317	0.657952	0.0453205
ENSGALG00000036589	GFRA4	4	134.536	1.31612	0.475918	0.00568482
ENSGALG00000048315		22	26.2004	1.31513	0.491965	0.00751256
ENSGALG00000050831		11	82.1842	1.3141	0.302968	1.44156e-05
ENSGALG00000029392	GABRB3	1	83.4722	1.31302	0.417854	0.00167629
ENSGALG00000012984		28	11.2078	1.31229	0.662853	0.0477301
ENSGALG00000010156	DOCK8	Z	263.982	1.3101	0.273277	1.6345e-06
ENSGALG00000016975	KCTD4	1	37.6138	1.31	0.4962	0.00828899
ENSGALG00000046991		5	30.044	1.30903	0.608886	0.0315643
ENSGALG00000010540	TTC39A	8	93.611	1.3081	0.282854	3.75262e-06
ENSGALG00000014372	SLC34A2	4	15.3589	1.30804	0.652854	0.0451159
ENSGALG00000003435	PGC	26	163.983	1.30781	0.271155	1.41331e-06
ENSGALG00000042715		2	53.3413	1.30741	0.377545	0.000534363
ENSGALG00000045925		1	41.0934	1.3056	0.408788	0.00140397
ENSGALG00000005426	FREM1	Z	3283.22	1.30401	0.334427	9.64906e-05
ENSGALG00000016622	STS	1	334.29	1.30398	0.245833	1.13091e-07
ENSGALG00000048230		1	31.5883	1.30147	0.534241	0.0148459
ENSGALG00000052173		31	54.6716	1.30117	0.357078	0.000268497
ENSGALG00000016300	TINAG	3	331.064	1.30038	0.378986	0.00060091
ENSGALG00000042116	FUT9	3	20.4651	1.30018	0.600917	0.0304901
ENSGALG00000015293	TMEM45A	1	78.468	1.29926	0.37154	0.000470592
ENSGALG00000047033		10	54.4793	1.29893	0.627585	0.0384783
ENSGALG00000054473	SLC13A3	20	181.049	1.29821	0.307116	2.36731e-05
ENSGALG00000010402	HPGDS	4	256.582	1.29774	0.218489	2.85705e-09
ENSGALG00000026070		25	207.207	1.2962	0.242746	9.30694e-08
ENSGALG00000014225	KCTD8	4	24.089	1.29583	0.544544	0.0173284
ENSGALG00000049574		1	356.611	1.29566	0.208784	5.44447e-10
ENSGALG00000000775	CTSS	25	428.199	1.29431	0.29468	1.12171e-05
ENSGALG00000039738	SLC9A3	2	18.9065	1.29309	0.58664	0.0275087
ENSGALG00000009965	MPL	8	393.266	1.29301	0.246449	1.54981e-07
ENSGALG00000010435	RASGRP3	3	510.579	1.29244	0.17961	6.20875e-13
ENSGALG00000006819	AGBL1	10	76.4829	1.29241	0.460309	0.00498981
ENSGALG00000038645	NXPH3	27	13.8524	1.29055	0.634987	0.0421123
ENSGALG00000054955		1	73.6912	1.28917	0.382925	0.000760875
ENSGALG00000008263	CNTN4	12	76.844	1.28884	0.560556	0.021493
ENSGALG00000051364		3	19.9761	1.28828	0.549744	0.019108
ENSGALG00000054821	NAALAD2	1	253.432	1.28518	0.322852	6.87132e-05
ENSGALG00000031700	TRPS1	2	333.513	1.28505	0.322687	6.82365e-05
ENSGALG00000046455		26	25.5235	1.28354	0.488227	0.00856387
ENSGALG00000011541	BIN1	7	4838.37	1.28105	0.22284	8.99048e-09
ENSGALG00000002112	CSF3R	23	59.7341	1.28088	0.393231	0.00112471
ENSGALG00000016664	NEIL2	3	64.1115	1.2797	0.448661	0.00434081
ENSGALG00000037077	CCR5	2	25.2119	1.27885	0.578577	0.0270819
ENSGALG00000002553	PCDH1	13	197.836	1.27793	0.322877	7.56007e-05
ENSGALG00000047357		3	21.1125	1.27705	0.549642	0.020157
ENSGALG00000005031	DRP2	4	37.1695	1.27577	0.447742	0.00438094
ENSGALG00000015970	COL9A1	3	150.34	1.27548	0.300427	2.1804e-05
ENSGALG00000007631	MEGF11	10	43.0478	1.27548	0.410212	0.00187521
ENSGALG00000041822	FGF22	28	120.611	1.27422	0.271472	2.68266e-06
ENSGALG00000054371		W	48.1533	1.27334	0.501234	0.0110722
ENSGALG00000037626	KCNQ3	2	77.5173	1.27152	0.5034	0.0115417
ENSGALG00000029446		1	19.9447	1.27147	0.563748	0.0241091
ENSGALG00000048332	GPR135	5	56.2268	1.27118	0.361706	0.000440754
ENSGALG00000040926	SAMSN1	1	50.4554	1.2707	0.386947	0.00102381
ENSGALG00000034905		W	553.206	1.26991	0.256129	7.11886e-07
ENSGALG00000002982	SLC2A6	17	32.6618	1.26877	0.481115	0.00836055
ENSGALG00000004860	RASD1	14	27.662	1.26833	0.568379	0.0256485
ENSGALG00000006792	VSTM2L	20	148.832	1.26722	0.320175	7.56124e-05
ENSGALG00000015835	GRIK1	1	110.922	1.2665	0.280706	6.42671e-06
ENSGALG00000035207	TDO2	4	53.5455	1.26588	0.56594	0.0253013
ENSGALG00000029485		20	526.828	1.26489	0.233326	5.92213e-08
ENSGALG00000010843	GPR137B	3	325.169	1.26439	0.231211	4.53729e-08
ENSGALG00000032028	SERTM1	1	109.986	1.26001	0.314593	6.19605e-05
ENSGALG00000030510		10	95.1506	1.25907	0.503702	0.0124326
ENSGALG00000031659		1	376.754	1.2571	0.318261	7.81841e-05
ENSGALG00000015519	ROBO2	1	170.528	1.25663	0.324837	0.000109514
ENSGALG00000033083	ATOH8	4	763.888	1.25233	0.187766	2.56457e-11
ENSGALG00000012576	RASEF	Z	23.7242	1.24964	0.576012	0.0300465
ENSGALG00000006804	ODF2L	8	35.3792	1.24902	0.464444	0.0071607
ENSGALG00000014178	SCUBE1	1	108.116	1.24705	0.322466	0.000110082
ENSGALG00000040051		5	272.54	1.24695	0.215784	7.52886e-09
ENSGALG00000001955	AANAT	18	20.8107	1.2435	0.627507	0.0475188
ENSGALG00000012119	MARCO	7	64.4555	1.24312	0.361272	0.000579638
ENSGALG00000050893	CCR2	2	74.4616	1.24026	0.351146	0.000412369
ENSGALG00000006413	CEMIP	10	501.108	1.23962	0.224123	3.18469e-08
ENSGALG00000015332	CPLX1	Z	92.7643	1.23932	0.357103	0.000519508
ENSGALG00000022887	KBTBD11	3	546.326	1.23918	0.25516	1.19484e-06
ENSGALG00000000690	GDPD4	1	499.216	1.23902	0.251178	8.10421e-07
ENSGALG00000005631	TRPM2	9	63.1959	1.23844	0.34767	0.000367884
ENSGALG00000050645		9	61.2981	1.23805	0.340637	0.000278499
ENSGALG00000001716	C10H15ORF59	10	72.0875	1.23636	0.367932	0.000778579
ENSGALG00000039741	TNFRSF8	21	32.0438	1.23512	0.438741	0.00487556
ENSGALG00000039432	P2RY13	9	69.5268	1.23438	0.311943	7.58766e-05
ENSGALG00000022871	HHLA2	1	420.86	1.23362	0.207198	2.61943e-09
ENSGALG00000010433		8	623.832	1.23354	0.234016	1.35554e-07
ENSGALG00000051214		3	44.9665	1.23321	0.386656	0.00142558
ENSGALG00000054317		1	263.081	1.23175	0.373439	0.000972375
ENSGALG00000003354	KCNH4	27	31.7792	1.23173	0.486147	0.0112881
ENSGALG00000012357	CXCR4	7	49.5288	1.23118	0.424696	0.00374402
ENSGALG00000005352	GATA5	20	31055.6	1.22753	0.177066	4.13106e-12
ENSGALG00000005725	CSF1R	13	874.646	1.22631	0.212768	8.23262e-09
ENSGALG00000034297	TBX2	19	615.285	1.22603	0.215746	1.32554e-08
ENSGALG00000039474	ID4	2	4314.23	1.22593	0.265248	3.804e-06
ENSGALG00000041094	SYT1	1	145.687	1.22201	0.299726	4.56012e-05
ENSGALG00000047338		17	62.079	1.22136	0.453996	0.00714013
ENSGALG00000006361	NEU4	9	40.916	1.2213	0.387429	0.00161978
ENSGALG00000029811	BMPER	2	1385.67	1.22112	0.206784	3.52048e-09
ENSGALG00000026884		Z	25.1989	1.21791	0.515112	0.0180613
ENSGALG00000053092		11	39.0383	1.21694	0.469532	0.00954729
ENSGALG00000001153	AUTS2	19	840.897	1.21617	0.389349	0.00178663
ENSGALG00000028354	METRNL	18	1946.78	1.21513	0.215507	1.71546e-08
ENSGALG00000051496		17	2720.85	1.21455	0.473253	0.0102763
ENSGALG00000012061		7	216.303	1.21152	0.320352	0.000155677
ENSGALG00000023036		Z	40.2782	1.21007	0.510902	0.0178607
ENSGALG00000051766		11	77.5538	1.20897	0.417611	0.00379204
ENSGALG00000003777	NELL1	5	483.815	1.20829	0.259213	3.141e-06
ENSGALG00000008298	LRRC17	1	3095.05	1.20491	0.257767	2.94822e-06
ENSGALG00000020876	AOX2	7	799.81	1.20253	0.444685	0.00684624
ENSGALG00000015152	BOC	1	1111.37	1.2009	0.368584	0.00112148
ENSGALG00000047577		5	409.893	1.20062	0.186843	1.31151e-10
ENSGALG00000009037	SPTLC3	3	18.59	1.19809	0.589625	0.0421581
ENSGALG00000023584	TAFA5	1	81.18	1.19805	0.30458	8.37328e-05
ENSGALG00000016499		3	31.9101	1.19794	0.470268	0.0108541
ENSGALG00000044501		4	60.2066	1.19721	0.339224	0.000416698
ENSGALG00000006479	CCM2L	20	164.209	1.19712	0.257311	3.28068e-06
ENSGALG00000052827		7	25.2282	1.19489	0.505539	0.018098
ENSGALG00000004070	MICALL2	14	1009.3	1.19414	0.230435	2.19385e-07
ENSGALG00000010145	MDGA1	3	109.711	1.19371	0.29989	6.87758e-05
ENSGALG00000000703	SLC45A3	26	56.6373	1.19244	0.433394	0.00593425
ENSGALG00000014585		19	149.667	1.19142	0.251889	2.24562e-06
ENSGALG00000008744	MCF2L2	9	176.735	1.19129	0.255518	3.12793e-06
ENSGALG00000038000	CX3CR1	2	70.9999	1.19018	0.357788	0.000879425
ENSGALG00000042279	CYP24A1	20	19.1268	1.18839	0.526749	0.0240658
ENSGALG00000003980	IQCA1	7	60.7668	1.18729	0.366038	0.00118023
ENSGALG00000004669	ASPA	19	38.2137	1.18598	0.439021	0.00690448
ENSGALG00000009003	SNAP25	3	569.617	1.18564	0.274544	1.57032e-05
ENSGALG00000037841	GRM7	12	108.601	1.18519	0.2749	1.62258e-05
ENSGALG00000006192	USH1C	5	140.132	1.18397	0.346303	0.00062875
ENSGALG00000003836		7	87.2048	1.18312	0.514022	0.0213525
ENSGALG00000002789	MAP2	7	440.73	1.18248	0.26378	7.36568e-06
ENSGALG00000020943	AGXT	9	25.0993	1.18234	0.472903	0.0124132
ENSGALG00000006050	CYP2R1	5	322.203	1.18218	0.272485	1.43445e-05
ENSGALG00000005330	SNCAIP	Z	2675.85	1.18172	0.204154	7.10617e-09
ENSGALG00000005638	IL2RG	4	63.7674	1.1813	0.397097	0.00293155
ENSGALG00000009452	GALNT16	5	220.826	1.18053	0.30814	0.000127545
ENSGALG00000038636	LAPTM5	23	420.604	1.17988	0.21699	5.40452e-08
ENSGALG00000040418	DGAT2	1	46.395	1.17938	0.385329	0.00220819
ENSGALG00000052026		4	40.4274	1.17899	0.398352	0.00307977
ENSGALG00000053833	C1orf210	8	76.4309	1.17875	0.305155	0.000112098
ENSGALG00000008418	LARGE2	5	1170.12	1.17871	0.193506	1.11967e-09
ENSGALG00000007218	MB21D2	9	94.2164	1.17723	0.299636	8.5348e-05
ENSGALG00000004812	FAM129A	8	533.582	1.17502	0.183953	1.68487e-10
ENSGALG00000037193	HECW1	2	562.295	1.17401	0.325848	0.000314643
ENSGALG00000007025	CPNE8	1	81.1837	1.17319	0.323687	0.000289574
ENSGALG00000054988	SLC22A31	11	299.912	1.1728	0.301882	0.000102346
ENSGALG00000008006	CAPN6	4	269.28	1.17195	0.46484	0.0116957
ENSGALG00000010198	TPH2	1	33.6424	1.17154	0.441347	0.00794362
ENSGALG00000014337	NWD2	4	49.1969	1.17126	0.413336	0.00460176
ENSGALG00000008475	ARRDC1	17	725.115	1.1712	0.220251	1.05165e-07
ENSGALG00000003353	RAI14	Z	2668.8	1.1695	0.165603	1.6403e-12
ENSGALG00000002028	GPRC5B	14	384.206	1.16871	0.283041	3.64145e-05
ENSGALG00000032161	SCUBE2	5	39.5845	1.1671	0.463169	0.0117414
ENSGALG00000036969	KLHL14	2	186.708	1.16685	0.352524	0.000932959
ENSGALG00000002594	TFPI	7	1264.41	1.1667	0.171089	9.15109e-12
ENSGALG00000027330	SYNPO	13	952.299	1.16606	0.234127	6.34272e-07
ENSGALG00000005853	HTR2C	4	56.2406	1.15633	0.389673	0.00300287
ENSGALG00000053303		KZ626825.1	28.3611	1.15591	0.569338	0.0423296
ENSGALG00000043433	SCX	2	41.3585	1.15198	0.457791	0.0118568
ENSGALG00000053511	APOLD1	1	364.784	1.15182	0.313041	0.000233743
ENSGALG00000030115	WISP1	2	1074.04	1.15139	0.280215	3.97439e-05
ENSGALG00000041622		8	645.35	1.15136	0.215871	9.63022e-08
ENSGALG00000030908		12	712.726	1.15085	0.413691	0.00540392
ENSGALG00000009205		14	257.121	1.15075	0.278011	3.48498e-05
ENSGALG00000030081	SKAP2	2	979.837	1.15008	0.233767	8.66483e-07
ENSGALG00000035228		1	116.179	1.1474	0.393628	0.00355775
ENSGALG00000014877	EMB	Z	4540.11	1.14683	0.192448	2.53547e-09
ENSGALG00000032087	MC5R	2	151.018	1.14637	0.264354	1.44772e-05
ENSGALG00000034649	TOX3	11	167.057	1.14587	0.230171	6.41282e-07
ENSGALG00000028912	SCRT2	20	26.5201	1.14528	0.445939	0.0102218
ENSGALG00000015572	CCDC125	Z	116.007	1.14523	0.2855	6.03791e-05
ENSGALG00000003550	ARHGAP40	20	109.805	1.14429	0.413296	0.00562828
ENSGALG00000028041		4	137.118	1.14426	0.251944	5.57981e-06
ENSGALG00000000379	ITGB3	27	1466.5	1.1442	0.274942	3.16033e-05
ENSGALG00000008133	AS3MT	6	745.188	1.14247	0.280701	4.70032e-05
ENSGALG00000036240	AKAP12	3	11740.6	1.14053	0.20614	3.15177e-08
ENSGALG00000008127	SPI1	5	215.297	1.14002	0.335221	0.000671859
ENSGALG00000005974	COL6A1	7	2838.98	1.13904	0.331631	0.000593297
ENSGALG00000008439	CD36	1	310.479	1.1379	0.271124	2.70501e-05
ENSGALG00000010931	B3GALT1	7	120.659	1.13651	0.30084	0.000158228
ENSGALG00000029921	CSRP2	1	1077.18	1.13554	0.380936	0.00287387
ENSGALG00000029140	CRABP2	25	1297.62	1.13454	0.253228	7.45264e-06
ENSGALG00000034616	INHBA	2	394.39	1.13341	0.239478	2.21436e-06
ENSGALG00000051658		9	68.7814	1.13222	0.405938	0.00528481
ENSGALG00000009388	SUSD4	3	34.3512	1.13113	0.478939	0.0181898
ENSGALG00000042810		14	851.993	1.1309	0.25299	7.81654e-06
ENSGALG00000004083	GRIA1	13	44.1765	1.1306	0.521177	0.0300584
ENSGALG00000000151	ADAMTS19	Z	715.359	1.12878	0.20847	6.14368e-08
ENSGALG00000047182	ACHE	31	130.427	1.12799	0.301599	0.000184003
ENSGALG00000032506	GEM	2	2228.72	1.12778	0.23458	1.5271e-06
ENSGALG00000023472		11	566.357	1.12766	0.251664	7.43547e-06
ENSGALG00000050332		14	110.432	1.12715	0.312979	0.000316567
ENSGALG00000012089		5	34.1064	1.12531	0.437189	0.0100542
ENSGALG00000020554	ADAMTSL1	Z	235.829	1.12182	0.444778	0.0116621
ENSGALG00000039682	HCLS1	1	115.661	1.12177	0.345066	0.00115047
ENSGALG00000008442	TENM1	4	165.345	1.12073	0.462006	0.0152754
ENSGALG00000021395		18	71.2529	1.12047	0.410333	0.00632135
ENSGALG00000034025	ASIC1	33	169.412	1.12042	0.268396	2.98615e-05
ENSGALG00000016904	SLITRK6	1	960.736	1.11936	0.224696	6.30434e-07
ENSGALG00000006937	P4HTM	12	931.144	1.11891	0.184183	1.23992e-09
ENSGALG00000037249	KCNQ5	3	83.7215	1.11855	0.387455	0.00389028
ENSGALG00000042986	RNASEL	8	290.455	1.11682	0.231357	1.38434e-06
ENSGALG00000047442		1	564.897	1.1152	0.46688	0.0169116
ENSGALG00000016058	ERG	1	661.272	1.11213	0.184538	1.67491e-09
ENSGALG00000026299	C3orf52	1	68.4631	1.11094	0.32876	0.000726975
ENSGALG00000002556	NGF	26	25.8022	1.11074	0.485622	0.0221807
ENSGALG00000020392	PRIMA1	5	181.749	1.10883	0.254016	1.27009e-05
ENSGALG00000055140		9	36.2234	1.1067	0.468878	0.0182592
ENSGALG00000016693	CSF2RA	1	73.4369	1.10664	0.321853	0.000585279
ENSGALG00000007371	IGDCC3	10	141.733	1.10593	0.29785	0.000204772
ENSGALG00000050728		25	49.7896	1.10516	0.387502	0.0043442
ENSGALG00000005305	ACKR2	2	63.0811	1.10284	0.351709	0.00171474
ENSGALG00000053451		Z	33.8609	1.10151	0.459102	0.0164283
ENSGALG00000026034	RGS17	3	30.822	1.10117	0.489331	0.0244255
ENSGALG00000013409		23	52.5163	1.10107	0.395291	0.00534507
ENSGALG00000028142	HACD4	Z	83.4557	1.10065	0.340104	0.00121123
ENSGALG00000040621	IL18R1	1	143.647	1.10008	0.264647	3.22753e-05
ENSGALG00000003589	VTN	19	155.555	1.09939	0.367577	0.00278155
ENSGALG00000046125	PECAM1	18	8443.22	1.09817	0.166022	3.72514e-11
ENSGALG00000028790	DNASE2B	8	220.42	1.09634	0.244233	7.15846e-06
ENSGALG00000045636		Z	36.1221	1.09405	0.447341	0.0144577
ENSGALG00000006719	GNAZ	15	41.9279	1.09399	0.483818	0.0237492
ENSGALG00000008629	MRC1	2	1064	1.09377	0.169516	1.10136e-10
ENSGALG00000035457		13	78.1447	1.09355	0.354169	0.00201746
ENSGALG00000017362	HAVCR1	13	116.358	1.0925	0.296315	0.000226968
ENSGALG00000014561	PTPN6	1	312.9	1.0918	0.22536	1.26794e-06
ENSGALG00000052645		1	71.242	1.0913	0.298207	0.000252669
ENSGALG00000013253	INSRR	25	59.8877	1.08889	0.499423	0.0292357
ENSGALG00000017235	NOX4	1	404.164	1.08514	0.392973	0.00575592
ENSGALG00000003073	RHOBTB1	6	608.873	1.08446	0.174266	4.87727e-10
ENSGALG00000009021	ST6GALNAC5	8	778.719	1.0842	0.349574	0.00192544
ENSGALG00000001449	STRA6	10	1069.92	1.08416	0.195399	2.88268e-08
ENSGALG00000032640	CRIM1	3	1302.13	1.08266	0.348088	0.00186884
ENSGALG00000012735	EDN1	2	328.789	1.08204	0.201272	7.61517e-08
ENSGALG00000007917	LAMB4	1	120.633	1.0813	0.265592	4.67566e-05
ENSGALG00000045312	SEMA6C	25	114.633	1.0789	0.304211	0.000390293
ENSGALG00000030879	AR	4	772.969	1.07864	0.418341	0.00992659
ENSGALG00000027571		1	144.547	1.07531	0.259591	3.43812e-05
ENSGALG00000013627	SLC7A2	4	311.874	1.07448	0.261535	3.98518e-05
ENSGALG00000002707	CHRNB2	25	207.127	1.07219	0.312865	0.000610285
ENSGALG00000017136	GJB6	1	57.6255	1.07195	0.377097	0.00447423
ENSGALG00000006402	NRROS	9	68.5243	1.07181	0.326579	0.00103097
ENSGALG00000004274	TWIST2	7	949.122	1.06904	0.222404	1.53392e-06
ENSGALG00000012004	PRSS12	4	98.7751	1.0685	0.303348	0.000427749
ENSGALG00000037246	RAMP3	2	405.537	1.06792	0.19189	2.61727e-08
ENSGALG00000050299		6	40.9936	1.06718	0.473957	0.0243458
ENSGALG00000002554	TSPAN2	26	175.726	1.06698	0.271918	8.71189e-05
ENSGALG00000010595	GPR65	5	26.8774	1.06684	0.467523	0.0224957
ENSGALG00000028770	INHBB	7	124.854	1.06556	0.257215	3.43279e-05
ENSGALG00000052388	METRN	14	477.098	1.06412	0.213136	5.9539e-07
ENSGALG00000035856	CD48	25	121.246	1.06384	0.394293	0.00697393
ENSGALG00000006851		4	706.546	1.06374	0.346739	0.00215618
ENSGALG00000014537	BMF	5	828.801	1.06343	0.222334	1.72694e-06
ENSGALG00000054784		7	71.703	1.06336	0.358075	0.00298141
ENSGALG00000052818		11	55.0316	1.06334	0.515241	0.0390386
ENSGALG00000003863	P2RX7	15	32.3948	1.06279	0.453352	0.0190631
ENSGALG00000026192	ST8SIA4	Z	158.597	1.06208	0.221546	1.63544e-06
ENSGALG00000014490	P3H3	1	1257.29	1.06158	0.233544	5.4805e-06
ENSGALG00000015776	GABRR2	3	23.4874	1.05836	0.530226	0.0459271
ENSGALG00000030732	MAPK8IP1	5	643.582	1.05783	0.191456	3.29158e-08
ENSGALG00000013672	TSHZ1	2	491.674	1.05674	0.243117	1.38247e-05
ENSGALG00000038768	FAM20C	14	406.556	1.0564	0.289934	0.000268884
ENSGALG00000025946	MOB3C	8	335.328	1.0564	0.247904	2.03233e-05
ENSGALG00000001191	MEOX1	27	209.335	1.056	0.407009	0.00947179
ENSGALG00000027526	COL9A2	23	354.677	1.05599	0.271181	9.85895e-05
ENSGALG00000017327	P2RY6	1	150.732	1.05483	0.307501	0.000602843
ENSGALG00000047771	PGF	5	94.3749	1.05371	0.364008	0.00379469
ENSGALG00000002169	PLEKHB2	9	2173.69	1.0526	0.202693	2.06866e-07
ENSGALG00000045469	BCAN	25	100.653	1.05067	0.327599	0.00134041
ENSGALG00000045196	LAPTM4B	2	267.502	1.0506	0.320351	0.00103982
ENSGALG00000028083	THSD1	1	243.381	1.0505	0.325124	0.00123322
ENSGALG00000006572	TNNT3	5	151.729	1.04966	0.37336	0.00493271
ENSGALG00000034561	C8orf34	2	28.1327	1.04928	0.496704	0.0346458
ENSGALG00000010874	UNC79	5	568.493	1.04861	0.338232	0.00193339
ENSGALG00000016261	CYBB	1	118.429	1.04707	0.287427	0.00026957
ENSGALG00000025862	TMEM26	6	2700.53	1.04415	0.174998	2.4224e-09
ENSGALG00000039817	NOG2	14	42.0314	1.0439	0.398319	0.00877307
ENSGALG00000000141	BLB1	16	30.1508	1.04273	0.496218	0.0356093
ENSGALG00000008337		15	166.563	1.04242	0.23671	1.06388e-05
ENSGALG00000023338	CBX2	18	722.596	1.0423	0.1905	4.46566e-08
ENSGALG00000007242	SLITRK4	4	157.794	1.04136	0.293011	0.000379443
ENSGALG00000004297	DNAH1	12	302.094	1.04021	0.468044	0.0262527
ENSGALG00000002113	LCP2	13	87.423	1.04008	0.339618	0.00219495
ENSGALG00000023886	ZNF804A	7	165.175	1.03904	0.278336	0.000189174
ENSGALG00000048084		9	42.6904	1.03879	0.374582	0.00555104
ENSGALG00000004058	GPR146	14	191.719	1.03855	0.234233	9.25682e-06
ENSGALG00000049151		7	431.995	1.03479	0.236784	1.24133e-05
ENSGALG00000010778	CHRM3	3	201.07	1.03326	0.303829	0.000671889
ENSGALG00000013060	ADCY2	2	723.197	1.03297	0.272576	0.000150846
ENSGALG00000012544		7	54.5658	1.03145	0.394069	0.0088596
ENSGALG00000029195	STK32A	13	183.25	1.03005	0.270204	0.000137776
ENSGALG00000013971	SGK1	3	2533.4	1.02947	0.243799	2.41472e-05
ENSGALG00000010934	PATJ	8	1159.29	1.02872	0.279653	0.000234566
ENSGALG00000014853	CLVS2	3	82.207	1.02806	0.336575	0.00225453
ENSGALG00000004521	GPX3	13	6623.69	1.02802	0.23893	1.688e-05
ENSGALG00000040256	RIMS2	2	130.331	1.02787	0.334286	0.0021062
ENSGALG00000003644		10	50.2299	1.02733	0.390598	0.00853453
ENSGALG00000011111	PGBD5	3	31.5062	1.02619	0.448612	0.0221682
ENSGALG00000017652	TTC9	5	1238.85	1.02401	0.189904	6.95779e-08
ENSGALG00000012111	TMEM37	7	243.348	1.02244	0.320622	0.00142807
ENSGALG00000033593	UBE2E2	2	1508.16	1.02171	0.206159	7.19902e-07
ENSGALG00000006341	SLC25A48	13	49.541	1.02029	0.357998	0.00437216
ENSGALG00000037131		30	199.564	1.01908	0.391186	0.00918428
ENSGALG00000054250		30	63.2227	1.0179	0.424334	0.0164481
ENSGALG00000016358	PTCHD1	1	564.616	1.01764	0.351507	0.00379074
ENSGALG00000036547		4	83.4366	1.01763	0.305432	0.00086294
ENSGALG00000013311	ANO3	5	673.027	1.01749	0.215055	2.23113e-06
ENSGALG00000005958		5	91.55	1.01677	0.326569	0.00184879
ENSGALG00000006343	ACTA2	6	7664.18	1.01645	0.186028	4.65629e-08
ENSGALG00000006507	CLMP	24	769.383	1.016	0.322874	0.00165098
ENSGALG00000002671		15	512.907	1.01587	0.259552	9.08011e-05
ENSGALG00000008121	CYP17A1	6	106.633	1.0146	0.316301	0.00133797
ENSGALG00000002742	TMEM132B	15	228.685	1.01442	0.402433	0.0117114
ENSGALG00000014978	IQGAP2	Z	1843.81	1.01432	0.164055	6.29776e-10
ENSGALG00000035065	FAM110B	2	1772.53	1.01251	0.19011	1.00445e-07
ENSGALG00000004074	KCNS1	20	52.4137	1.01217	0.402202	0.0118502
ENSGALG00000042773	VOPP1	2	204.72	1.00905	0.261211	0.000112016
ENSGALG00000000507	CPNE7	11	24.3533	1.00782	0.467431	0.0310773
ENSGALG00000008113	PLCL1	7	331.636	1.00635	0.240618	2.8849e-05
ENSGALG00000000476	LRRTM4	22	187.602	1.00617	0.270539	0.000199901
ENSGALG00000010870	JUN	8	3284.39	1.00468	0.326685	0.00210247
ENSGALG00000027986	NIPAL1	4	41.2632	1.0039	0.393837	0.0108025
ENSGALG00000007963	NFATC2	20	162.07	1.0038	0.256848	9.30003e-05
ENSGALG00000032231	C4	16	143.718	1.00278	0.375804	0.00762238
ENSGALG00000007070		14	119.919	1.00212	0.347681	0.00394775
ENSGALG00000007441	MAP6	1	401.239	1.00006	0.179884	2.70559e-08
ENSGALG00000008940		5	158.949	0.99949	0.26764	0.000188119
ENSGALG00000011813	HEG1	7	1319.52	0.998543	0.236121	2.34789e-05
ENSGALG00000042726	TRMT9B	4	129.475	0.998199	0.247547	5.52209e-05
ENSGALG00000010303		3	205.66	0.997148	0.222696	7.54822e-06
ENSGALG00000042759	PRKX	1	519.468	0.995668	0.217228	4.57206e-06
ENSGALG00000053916	ABCB1	2	71.2675	0.995603	0.311755	0.0014054
ENSGALG00000053700		2	55.8391	0.994144	0.336141	0.00310123
ENSGALG00000031534	ARID5B	6	1450.35	0.99183	0.295691	0.000795726
ENSGALG00000032701	LY96	2	43.6258	0.991815	0.468912	0.0344178
ENSGALG00000035498	INPP5D	9	519.252	0.991781	0.210419	2.43664e-06
ENSGALG00000004508	EYA2	20	295.103	0.99152	0.250478	7.54196e-05
ENSGALG00000003562	NPTX2	14	199.69	0.991352	0.374156	0.00805939
ENSGALG00000010490	DPYSL4	6	85.4557	0.99112	0.4887	0.0425525
ENSGALG00000017276		1	61.8555	0.990776	0.396385	0.0124357
ENSGALG00000028478	CELF3	25	38.3898	0.990082	0.460578	0.0315831
ENSGALG00000050931		2	491.332	0.988802	0.303632	0.00112762
ENSGALG00000042748		22	71.4041	0.988635	0.328283	0.00259935
ENSGALG00000002557	ADGRD1	15	621.262	0.986337	0.41362	0.0170955
ENSGALG00000026704	GPX8	Z	643.822	0.985792	0.212117	3.36153e-06
ENSGALG00000041563	UNC80	7	170.801	0.985606	0.455768	0.0305785
ENSGALG00000032415	SEZ6L	15	214.645	0.985066	0.348304	0.0046814
ENSGALG00000008456	CACNA1B	17	57.8927	0.982892	0.49983	0.0492465
ENSGALG00000051527		17	62.6137	0.982279	0.387073	0.011158
ENSGALG00000001571	MYO1F	28	182.025	0.981894	0.318374	0.00204176
ENSGALG00000048097		1	44.375	0.981199	0.372135	0.00837228
ENSGALG00000038133	SMIM3	13	362.198	0.980867	0.244991	6.23652e-05
ENSGALG00000021039	HKDC1	6	54.0927	0.98041	0.348896	0.00495356
ENSGALG00000012156	DPP10	7	513.469	0.980069	0.222747	1.08289e-05
ENSGALG00000049402		26	128.218	0.978238	0.245869	6.92964e-05
ENSGALG00000002544	PCDH12	13	254.538	0.978163	0.220769	9.39267e-06
ENSGALG00000039118	MEIS2	5	5484.33	0.977511	0.157803	5.84681e-10
ENSGALG00000020201	CEP44	4	1203.06	0.977369	0.175669	2.64099e-08
ENSGALG00000006958		17	852.948	0.976516	0.257641	0.000150518
ENSGALG00000005472	NAT	11	55.1768	0.975895	0.333353	0.00341686
ENSGALG00000052162	PPM1L	9	380.988	0.975741	0.379361	0.0101095
ENSGALG00000011283		2	160.748	0.975225	0.257777	0.000154822
ENSGALG00000012293	C22orf23	1	57.3323	0.974063	0.383819	0.0111547
ENSGALG00000016443	HPCAL1	3	507.777	0.972859	0.368211	0.00823882
ENSGALG00000014875	HCN1	Z	80.0691	0.971646	0.431426	0.0243112
ENSGALG00000050120		22	33.1732	0.970877	0.405586	0.0166766
ENSGALG00000009604	DBX2	1	755.132	0.97079	0.334358	0.00369079
ENSGALG00000048285	TCN2	15	652.943	0.970536	0.202933	1.73085e-06
ENSGALG00000049278		3	82.3227	0.969993	0.400213	0.0153635
ENSGALG00000003580	MMP2	11	8629	0.967474	0.174635	3.02504e-08
ENSGALG00000014515	C1QTNF7	4	90.6895	0.965102	0.394233	0.0143632
ENSGALG00000002546	COL5A1	17	14070.3	0.964513	0.415383	0.0202336
ENSGALG00000051473		1	148.485	0.963746	0.309737	0.00186142
ENSGALG00000050160		4	26.6682	0.963088	0.450382	0.032486
ENSGALG00000040755	ANGPT4	20	363.879	0.963075	0.280755	0.000602899
ENSGALG00000013414	PDLIM3	4	460.319	0.962011	0.256997	0.000181633
ENSGALG00000016348	SAT1	1	3201.74	0.96143	0.390946	0.0139231
ENSGALG00000002103	TPPP3	11	125.243	0.96113	0.281439	0.000637695
ENSGALG00000012219	UNC5C	4	1400.45	0.960566	0.254694	0.000162297
ENSGALG00000013081	VWC2	2	71.2221	0.960254	0.436979	0.0279859
ENSGALG00000007305	NME1	18	203.54	0.959889	0.227615	2.47401e-05
ENSGALG00000054698		Z	23.4296	0.958643	0.463163	0.0384732
ENSGALG00000034054		27	29.2533	0.95781	0.43627	0.028131
ENSGALG00000000442	KCNA2	26	182.109	0.957735	0.373754	0.010393
ENSGALG00000030526		1	273.189	0.957279	0.265469	0.000310955
ENSGALG00000010166	VLDLR	Z	3603.59	0.956587	0.198117	1.37632e-06
ENSGALG00000031359	GCK	22	62.9697	0.955533	0.322013	0.00300357
ENSGALG00000016215	DIPK2B	1	1002.46	0.954543	0.213578	7.8479e-06
ENSGALG00000045251		24	78.6302	0.954228	0.297158	0.00132193
ENSGALG00000012178	PDGFB	1	128.511	0.954111	0.306287	0.00183893
ENSGALG00000021271	MPZL3	24	94.0741	0.953112	0.318235	0.00274449
ENSGALG00000011320	TMCC3	1	80.7806	0.95251	0.304251	0.00174407
ENSGALG00000032789	TBX18	3	17251.7	0.952121	0.210241	5.93449e-06
ENSGALG00000007123		4	62.8162	0.951897	0.341007	0.00524752
ENSGALG00000034213	TNFRSF1B	21	1341.44	0.951799	0.171666	2.9485e-08
ENSGALG00000055112		24	81.2992	0.951421	0.369636	0.0100547
ENSGALG00000004695	ECM2	12	523.025	0.94693	0.311037	0.0023312
ENSGALG00000030809		3	68.3805	0.946909	0.440238	0.0314839
ENSGALG00000027069	TSC22D4	4	450.478	0.946649	0.245287	0.000113687
ENSGALG00000031548		23	45.4452	0.945535	0.454107	0.0373254
ENSGALG00000032974	ADAMTS2	13	902.839	0.94308	0.376287	0.0122009
ENSGALG00000012124	PELI2	5	367.201	0.942921	0.227677	3.45068e-05
ENSGALG00000000044	WFIKKN1	14	64.202	0.941653	0.351517	0.00738815
ENSGALG00000003529	SYNC	23	432.414	0.939953	0.226504	3.32731e-05
ENSGALG00000003859	KRT222	27	104.026	0.939491	0.324221	0.00375928
ENSGALG00000036111	ITM2C	9	1033	0.938205	0.227902	3.84345e-05
ENSGALG00000007127		5	930.005	0.93725	0.238556	8.53519e-05
ENSGALG00000047067		Z	130.96	0.936975	0.258807	0.000294198
ENSGALG00000016868	NALCN	1	251.462	0.935077	0.309946	0.00255369
ENSGALG00000049395		14	463.768	0.934361	0.261832	0.000358968
ENSGALG00000014725	PLK2	Z	1993.83	0.934199	0.228749	4.42767e-05
ENSGALG00000030902		2	1359.26	0.933927	0.256904	0.000277648
ENSGALG00000045548		Z	612.998	0.932767	0.260619	0.000344858
ENSGALG00000017558		Z	670.15	0.932212	0.258884	0.000317127
ENSGALG00000047426		W	273.576	0.930896	0.25661	0.000285992
ENSGALG00000005470	PLPPR5	8	39.5939	0.924854	0.408901	0.0237094
ENSGALG00000051085		3	1013.28	0.924308	0.325477	0.00451345
ENSGALG00000026970		5	2033.03	0.923643	0.222405	3.28169e-05
ENSGALG00000007349	RASL12	10	178.541	0.922114	0.225036	4.1739e-05
ENSGALG00000051773	JHY	24	37.6434	0.921945	0.3941	0.0193165
ENSGALG00000041233		2	221.123	0.921307	0.285951	0.00127343
ENSGALG00000009520	2022-03-01	4	205.84	0.92092	0.310756	0.00304174
ENSGALG00000033408	ZBTB7C	Z	66.4009	0.920113	0.400358	0.0215491
ENSGALG00000011153	LY75	7	992.977	0.919856	0.297229	0.00196963
ENSGALG00000026152		12	141.967	0.918739	0.261152	0.000434776
ENSGALG00000030493	ENTPD3	2	644.985	0.918652	0.423079	0.0299049
ENSGALG00000012550	HMOX1	1	711.269	0.9183	0.331416	0.00559132
ENSGALG00000032361	STXBP5L	1	386.152	0.914967	0.257797	0.000386441
ENSGALG00000002900	NOTUM	18	49.041	0.914739	0.438692	0.0370557
ENSGALG00000033791	MAP3K12	33	114.634	0.914268	0.382605	0.0168674
ENSGALG00000002283	MAPKAPK3	12	681.821	0.914244	0.182747	5.65061e-07
ENSGALG00000006609	EPHB1	9	997.544	0.910847	0.227694	6.3257e-05
ENSGALG00000043573	CHMP4C	2	78.5087	0.910316	0.29433	0.00198249
ENSGALG00000015713	FAM53A	4	1725.05	0.909488	0.148287	8.60687e-10
ENSGALG00000011406	NTN4	1	184.016	0.907925	0.278641	0.00112041
ENSGALG00000010589	FLRT2	5	709.138	0.90777	0.209061	1.41109e-05
ENSGALG00000049304		4	49.2207	0.907711	0.424067	0.0323155
ENSGALG00000015428		Z	394.737	0.907205	0.339667	0.0075656
ENSGALG00000014880	PARP8	Z	911.962	0.906099	0.20104	6.57295e-06
ENSGALG00000048807		2	80.2517	0.906082	0.312842	0.00377598
ENSGALG00000034119		2	171.238	0.904816	0.396885	0.0226198
ENSGALG00000015977	SMOX	4	612.362	0.904608	0.234304	0.000113002
ENSGALG00000007417	ODAD2	2	42.432	0.904263	0.380402	0.0174481
ENSGALG00000036399		9	32.7652	0.904253	0.456703	0.0477082
ENSGALG00000006715	OAF	24	859.843	0.90348	0.198014	5.05006e-06
ENSGALG00000002081	MMP28	19	260.144	0.901871	0.221875	4.80807e-05
ENSGALG00000031424	SDC2	2	3082.49	0.901042	0.180286	5.79701e-07
ENSGALG00000053507		1	208.319	0.900973	0.218007	3.58408e-05
ENSGALG00000006756		20	450.677	0.900964	0.24339	0.000214138
ENSGALG00000008677	VIM	2	123191	0.900474	0.215653	2.97242e-05
ENSGALG00000051964		23	59.1832	0.900115	0.35932	0.0122434
ENSGALG00000046727		33	334.111	0.899419	0.29969	0.00268953
ENSGALG00000039320	ADGRF5	3	214.13	0.899045	0.302519	0.00296004
ENSGALG00000001264	PLXNA2	26	659.931	0.898463	0.371977	0.0157191
ENSGALG00000021031	CXCR7	7	7991.57	0.897371	0.211395	2.18597e-05
ENSGALG00000001798	BBS4	10	1001.92	0.896463	0.168317	1.00377e-07
ENSGALG00000039498	PPP3CA	4	1514.64	0.89564	0.155116	7.74059e-09
ENSGALG00000037975	CA3B	2	68.4083	0.894798	0.315139	0.00452013
ENSGALG00000030613	PDGFRB	13	670.279	0.893679	0.250257	0.00035556
ENSGALG00000055000	KCTD14	1	41.8208	0.893076	0.443515	0.0440484
ENSGALG00000021345	B3GNT9	11	207.482	0.892699	0.28651	0.00183468
ENSGALG00000012481	TNFAIP6	7	273.859	0.89219	0.263051	0.000694601
ENSGALG00000015969	FAM135A	3	2151.37	0.891586	0.192423	3.59584e-06
ENSGALG00000033351	CTHRC1	2	1507.25	0.891028	0.241459	0.000224093
ENSGALG00000010902	CERS6	7	394.24	0.890305	0.25135	0.000396958
ENSGALG00000041101	GALNT6	33	57.746	0.889623	0.40726	0.0289319
ENSGALG00000049751		1	47.5285	0.88914	0.365676	0.0150367
ENSGALG00000015628	MSANTD1	4	48.5229	0.888877	0.394181	0.0241336
ENSGALG00000054971	ARHGAP30	25	74.5098	0.888755	0.409175	0.0298505
ENSGALG00000048465		31	85.5834	0.886205	0.410082	0.0306918
ENSGALG00000037869		25	1535.09	0.885895	0.226409	9.12285e-05
ENSGALG00000034077	KCNK5	3	156.047	0.885068	0.382313	0.0206111
ENSGALG00000038596	C14orf132	5	74.076	0.881665	0.353767	0.0126947
ENSGALG00000016227	GPR34	1	168.968	0.881255	0.274737	0.00133831
ENSGALG00000026957	SEMA4G	6	618.241	0.880777	0.290761	0.00245194
ENSGALG00000041927	FZD9	19	1815.79	0.880606	0.17443	4.45318e-07
ENSGALG00000043701	ELK3	1	3188.6	0.87903	0.154388	1.24364e-08
ENSGALG00000010975	TMTC2	1	380.599	0.878984	0.184135	1.80984e-06
ENSGALG00000036925	CADM3	25	80.3086	0.878062	0.384312	0.0223265
ENSGALG00000011414	AMDHD1	1	70.1861	0.876784	0.321462	0.00638179
ENSGALG00000010269	KCNAB1	9	487.447	0.876696	0.224933	9.71532e-05
ENSGALG00000052425	BATF3	3	155.131	0.875885	0.356495	0.0140127
ENSGALG00000028924	S100A16	25	184.248	0.875634	0.273209	0.00135061
ENSGALG00000008237	GRAMD2B	Z	946.938	0.874411	0.200321	1.27098e-05
ENSGALG00000033529	BRPF1	12	2542.62	0.873478	0.228	0.000127602
ENSGALG00000037717		18	114.856	0.871366	0.303858	0.00413494
ENSGALG00000005323	DIRAS2	Z	203.573	0.871162	0.309788	0.00492151
ENSGALG00000009809		4	289.299	0.869911	0.316503	0.00598664
ENSGALG00000032022	CDH10	2	65.6783	0.869394	0.368066	0.0181738
ENSGALG00000011421	HAL	1	29.053	0.868676	0.439808	0.0482539
ENSGALG00000052196		23	436.325	0.868659	0.255015	0.000658472
ENSGALG00000050112		5	355.79	0.8678	0.300983	0.00393632
ENSGALG00000027655	TRABD2B	8	442.206	0.866422	0.325519	0.00777556
ENSGALG00000014508	CD38	4	227.505	0.866312	0.232639	0.000196215
ENSGALG00000041407		2	60.0873	0.865906	0.352226	0.0139564
ENSGALG00000004538	TNN	8	47.8864	0.863308	0.342702	0.0117647
ENSGALG00000014261	UCHL1	4	5479.76	0.863181	0.225877	0.00013266
ENSGALG00000049007		19	249.777	0.862992	0.305226	0.0046929
ENSGALG00000039216	COL6A2	7	3858.75	0.862489	0.304449	0.00461198
ENSGALG00000004734		4	45.4218	0.861364	0.37185	0.0205347
ENSGALG00000013771	CRACD	4	47.9012	0.86048	0.353465	0.0149159
ENSGALG00000010169		3	48.2823	0.860045	0.430316	0.0456477
ENSGALG00000054286	APLN	4	121.955	0.859431	0.358917	0.0166426
ENSGALG00000004096	CHRNA7	10	113.636	0.859402	0.396672	0.0302706
ENSGALG00000045199		5	796.875	0.857676	0.261493	0.00103836
ENSGALG00000042744	RGS2	8	350.585	0.857455	0.257546	0.000870542
ENSGALG00000032440	QPCT	3	1481.64	0.857431	0.186497	4.27472e-06
ENSGALG00000007809	TSHZ2	20	306.818	0.856484	0.225356	0.000144355
ENSGALG00000017302	SLCO2B1	1	160.774	0.854585	0.319892	0.00755181
ENSGALG00000047000		4	180.26	0.852661	0.280804	0.00239345
ENSGALG00000016635		1	9736.89	0.85223	0.366368	0.02001
ENSGALG00000006460	TTLL9	20	165.334	0.85067	0.226173	0.000169137
ENSGALG00000038575		18	75.8472	0.850433	0.367388	0.0206233
ENSGALG00000036327	NGEF	9	255.475	0.849745	0.272638	0.00182853
ENSGALG00000042797		3	3186.35	0.849509	0.274705	0.00198517
ENSGALG00000041120	METTL24	3	566.723	0.849324	0.173325	9.57544e-07
ENSGALG00000019663	ACBD7	2	567.687	0.849136	0.22869	0.000204789
ENSGALG00000038265	CREB5	2	232.721	0.849112	0.342565	0.0131868
ENSGALG00000027240	TSPAN13	2	580.686	0.849048	0.27919	0.00235708
ENSGALG00000004758	KCNB1	20	55.992	0.848172	0.34279	0.0133489
ENSGALG00000001387	SPNS2	19	94.942	0.848157	0.27308	0.00189708
ENSGALG00000041010	WBP1L	6	1298.07	0.847733	0.196292	1.56931e-05
ENSGALG00000039264	SLA	2	127.951	0.84746	0.302001	0.0050138
ENSGALG00000035807		5	98.7294	0.847065	0.297534	0.004414
ENSGALG00000038328	ANKRD33B	2	56.1874	0.847061	0.329454	0.0101374
ENSGALG00000008306	FGL2	1	104.146	0.846148	0.324153	0.00904541
ENSGALG00000031572		33	124.697	0.845207	0.294069	0.00405082
ENSGALG00000030543		8	73.0509	0.844787	0.346107	0.0146535
ENSGALG00000012395	PLEKHG1	3	873.062	0.844595	0.232383	0.000278516
ENSGALG00000053000	DNAAF9	4	3485.98	0.844329	0.309392	0.00635286
ENSGALG00000010836	AHR	2	1124.92	0.843345	0.187524	6.88296e-06
ENSGALG00000023396	ASPHD2	15	141.523	0.84317	0.265745	0.0015095
ENSGALG00000027793	SCN9A	7	302.568	0.842986	0.339992	0.0131592
ENSGALG00000018803	TMEM198	7	472.846	0.840897	0.217688	0.000112073
ENSGALG00000002632	CALCRL	7	1897.91	0.840393	0.242809	0.000537925
ENSGALG00000043190		1	45.8315	0.839767	0.409543	0.0403162
ENSGALG00000005901	PCMTD2	20	2352.1	0.839096	0.191914	1.2297e-05
ENSGALG00000041298		14	288.043	0.83891	0.257365	0.00111566
ENSGALG00000042642	RARRES2	2	2467.64	0.838192	0.250519	0.00082038
ENSGALG00000003866	FIBCD1	17	41.4206	0.834743	0.391698	0.033082
ENSGALG00000037166		5	56.3575	0.833683	0.353428	0.0183316
ENSGALG00000012454	CYTH4	1	67.6222	0.833433	0.353646	0.0184388
ENSGALG00000038936	TMEM182	1	76.3175	0.833168	0.422512	0.0486166
ENSGALG00000032239	GCHFR	5	446.625	0.833103	0.275852	0.00252686
ENSGALG00000006583	LSP1P1	5	16509.6	0.832801	0.217862	0.000132046
ENSGALG00000015746	JAM2	1	161.263	0.830681	0.258244	0.00129694
ENSGALG00000009850	NOVA1	5	1396.96	0.830268	0.15967	1.99386e-07
ENSGALG00000042992		1	79.7867	0.829425	0.337626	0.0140244
ENSGALG00000028978	BTBD19	8	140.79	0.827995	0.306436	0.00689204
ENSGALG00000037618	ASAP1	2	1379.21	0.826519	0.211665	9.42842e-05
ENSGALG00000055021	GREM2	3	153.699	0.825837	0.283718	0.00360546
ENSGALG00000010379	SNCA	4	73.8787	0.823778	0.374576	0.0278616
ENSGALG00000002046		6	164.089	0.823284	0.240447	0.000617128
ENSGALG00000006186	RAD21L1	20	100.313	0.822841	0.337568	0.0147869
ENSGALG00000048038		1	71.9106	0.822826	0.310979	0.00814691
ENSGALG00000004035	CRYBA1	19	41.1384	0.821519	0.369312	0.0261175
ENSGALG00000031866		6	44.099	0.821221	0.415898	0.0483166
ENSGALG00000032672	KRT5	33	56.1178	0.820317	0.315741	0.00937489
ENSGALG00000048093		15	99.1852	0.819795	0.334994	0.0143974
ENSGALG00000001812	ATCAY	28	108.545	0.819711	0.260374	0.0016428
ENSGALG00000016059	ETS2	1	1053.08	0.819128	0.210272	9.79708e-05
ENSGALG00000007680	ENKUR	2	80.7761	0.818588	0.31791	0.0100267
ENSGALG00000000783	PTAFR	23	106.667	0.81858	0.390875	0.0362397
ENSGALG00000024296		24	69.594	0.817525	0.308056	0.0079586
ENSGALG00000000604		23	542.759	0.816436	0.182952	8.09803e-06
ENSGALG00000007667	GPR158	2	130.842	0.815618	0.319993	0.0108075
ENSGALG00000010857	DAB1	8	620.96	0.815331	0.229818	0.000388585
ENSGALG00000012610	CTSV	Z	3969.96	0.81491	0.175728	3.52942e-06
ENSGALG00000016292		3	659.511	0.812939	0.360505	0.0241332
ENSGALG00000002958	DNER	9	386.515	0.812921	0.232928	0.000483008
ENSGALG00000046585		4	113.436	0.812472	0.312391	0.00930012
ENSGALG00000009004	ZNF804B	2	49.3651	0.812015	0.3574	0.023086
ENSGALG00000001407	ADAMTS15	24	2010.69	0.810187	0.209793	0.00011254
ENSGALG00000015128	AQP4	2	217.621	0.809354	0.20186	6.08534e-05
ENSGALG00000043632		9	225.791	0.809225	0.206724	9.05879e-05
ENSGALG00000001857	C1QTNF12	21	2006.5	0.809057	0.244719	0.000946183
ENSGALG00000042871	SLIT1	6	2685.95	0.808226	0.223865	0.00030581
ENSGALG00000014730	ELOVL7	Z	219.125	0.808043	0.242556	0.000864211
ENSGALG00000054759	B3GALNT1	9	555.534	0.808008	0.226149	0.000353042
ENSGALG00000015001	LAMA4	3	4204.39	0.807937	0.331008	0.0146531
ENSGALG00000014447	AK3	Z	428.81	0.80741	0.181219	8.37207e-06
ENSGALG00000005256	EPHA4	9	1232.41	0.807376	0.246445	0.00105257
ENSGALG00000000417	SLC16A4	26	192.704	0.806529	0.222386	0.00028706
ENSGALG00000015403	EPHA3	1	932.257	0.806484	0.376473	0.0321765
ENSGALG00000011274	DCN	1	8576.82	0.804833	0.182023	9.79674e-06
ENSGALG00000005204		15	159.856	0.804722	0.304594	0.00824306
ENSGALG00000035017		21	345.019	0.803451	0.182054	1.01824e-05
ENSGALG00000006942	PIK3IP1	15	722.328	0.803007	0.192815	3.11837e-05
ENSGALG00000002326		Z	709.216	0.800684	0.245788	0.00112348
ENSGALG00000019987	LRP11	3	462.991	0.799593	0.187498	2.00322e-05
ENSGALG00000033695	CYP26A1	6	1877.07	0.797938	0.241385	0.000947514
ENSGALG00000007886		5	688.697	0.79754	0.306954	0.00937019
ENSGALG00000004902	TOM1L2	14	3489.32	0.79702	0.214492	0.00020252
ENSGALG00000006174	VSTM4	6	2587.87	0.796409	0.195449	4.60589e-05
ENSGALG00000012704	MYLIP	2	1076.01	0.796313	0.186075	1.87286e-05
ENSGALG00000012801	LY86	2	300.837	0.796264	0.26266	0.00243313
ENSGALG00000007059	IGSF6	14	66.123	0.796202	0.303448	0.00869423
ENSGALG00000005802	FLT4	13	1425.32	0.796117	0.312671	0.0108908
ENSGALG00000017076	B3GLCT	1	1998.26	0.795919	0.160034	6.57779e-07
ENSGALG00000035016	ID2	3	7984.48	0.795689	0.241834	0.00100105
ENSGALG00000050288	DCP1B	1	612.676	0.795632	0.165932	1.6273e-06
ENSGALG00000001289		28	446.914	0.79469	0.208734	0.000140551
ENSGALG00000010364	AADAC	9	95.5166	0.793524	0.315514	0.0119026
ENSGALG00000044466		11	121.594	0.793003	0.281931	0.00491188
ENSGALG00000006137		6	617.918	0.791592	0.19898	6.94253e-05
ENSGALG00000015511	ROBO1	1	1525.96	0.791104	0.200127	7.71735e-05
ENSGALG00000008621	NRP2	7	2452.38	0.790159	0.223433	0.000405539
ENSGALG00000055053	PRSS35	3	1112.58	0.789551	0.176413	7.62035e-06
ENSGALG00000016906	SPRY2	1	794.347	0.78955	0.182572	1.52818e-05
ENSGALG00000007114	APOA1	24	20360.7	0.789316	0.21666	0.000269364
ENSGALG00000036497	SOX4	2	1302.66	0.788949	0.190085	3.31746e-05
ENSGALG00000032577	MECOM	9	1536.15	0.788039	0.24701	0.00142119
ENSGALG00000007712	MYO1B	7	2180.01	0.787945	0.179462	1.13041e-05
ENSGALG00000028115	SFN	23	80.4014	0.786029	0.386059	0.0417472
ENSGALG00000026215		5	390.238	0.785901	0.261791	0.00268194
ENSGALG00000002714	TMEM132C	15	525.817	0.785419	0.201054	9.36371e-05
ENSGALG00000047664		3	1787.93	0.784619	0.15816	7.0156e-07
ENSGALG00000008139	EML6	3	97.134	0.784309	0.366648	0.0324251
ENSGALG00000039187	GKN2	22	7147.6	0.783001	0.317819	0.0137524
ENSGALG00000011241	RFTN1	2	1173.2	0.782874	0.195161	6.03516e-05
ENSGALG00000041662	OPN4-1	4	93.9609	0.781872	0.371288	0.0352184
ENSGALG00000036527	SYBU	2	164.177	0.781658	0.287317	0.00651749
ENSGALG00000043499	EGFL7	17	3337.03	0.7814	0.159676	9.89768e-07
ENSGALG00000034132	CACFD1	17	208.396	0.781327	0.222542	0.000446564
ENSGALG00000008976	ADAM22	2	194.284	0.780526	0.292405	0.00760018
ENSGALG00000049568		3	49.8888	0.780487	0.3789	0.0394103
ENSGALG00000013940	LNX1	4	117.041	0.78026	0.282461	0.00573847
ENSGALG00000005036	SH2D3C	17	1396	0.780185	0.181498	1.7188e-05
ENSGALG00000007252	ANKDD1A	10	95.848	0.779835	0.262243	0.0029422
ENSGALG00000017644	COTL1	11	3897.65	0.779704	0.203634	0.000128693
ENSGALG00000011468	IGFBP5	7	1272.65	0.778114	0.31319	0.0129741
ENSGALG00000012011	L3HYPDH	5	1171.58	0.777857	0.252464	0.00206267
ENSGALG00000010417	VDHAP	8	50.1343	0.7774	0.384119	0.0429854
ENSGALG00000003833	CACNA1E	8	171.319	0.77688	0.351413	0.0270543
ENSGALG00000004394		7	293.221	0.775527	0.219995	0.00042315
ENSGALG00000027093	TLR1B	4	276.826	0.774135	0.213437	0.000286738
ENSGALG00000039872	PDLIM4	13	217.042	0.774096	0.315333	0.0140941
ENSGALG00000005265	SYT9	5	412.757	0.772414	0.208258	0.000208144
ENSGALG00000004113		4	163.295	0.772363	0.24849	0.00188214
ENSGALG00000049832		9	48.9113	0.771645	0.392494	0.0492979
ENSGALG00000003689	PAPSS2	6	125.17	0.771377	0.278859	0.00567163
ENSGALG00000045949	EFCAB10	1	164.805	0.771164	0.279269	0.00575602
ENSGALG00000017199	MAML2	1	1302.65	0.770107	0.262863	0.00339303
ENSGALG00000016102	CYP26B1	4	462.431	0.76996	0.250392	0.00210488
ENSGALG00000040479	P2RX3	5	50.5597	0.76941	0.368124	0.0366104
ENSGALG00000011394	CYP2J21	8	302.021	0.768482	0.274699	0.00514928
ENSGALG00000004986	CERCAM	17	3057.39	0.767335	0.203575	0.000163706
ENSGALG00000046427	SAMD14	27	149.263	0.76661	0.265738	0.00391619
ENSGALG00000015708	FGFR3	4	2129.3	0.765126	0.301354	0.0111183
ENSGALG00000039269	RNF213	18	396.417	0.765086	0.315717	0.0153789
ENSGALG00000015687		4	83.3998	0.764932	0.362587	0.0348883
ENSGALG00000027517	gga-mir-3064	18	205.834	0.764239	0.229548	0.00087059
ENSGALG00000006633	TMEM243	1	114.74	0.76415	0.285877	0.00751744
ENSGALG00000008546	FGD5	12	1841.29	0.763388	0.184543	3.52412e-05
ENSGALG00000011529	NAAA	4	209.327	0.762041	0.274409	0.00548584
ENSGALG00000027351	LRRC71	25	59.9654	0.761016	0.360415	0.0347293
ENSGALG00000028821	GLIPR2	2	2159.5	0.760056	0.231225	0.00101232
ENSGALG00000013072	AKR1B10	1	747.126	0.760033	0.27339	0.00543532
ENSGALG00000042577	CFAP44	1	43.8179	0.759448	0.385527	0.0488507
ENSGALG00000031112	COL5A2	7	14642.2	0.759147	0.318809	0.0172565
ENSGALG00000011434	SLC11A1	7	89.1548	0.758912	0.294394	0.00994099
ENSGALG00000029024	TCF21	3	6441.52	0.75888	0.296688	0.0105327
ENSGALG00000006351	FAS	6	157.721	0.757522	0.242886	0.00181566
ENSGALG00000046223	GPR21	17	123.501	0.756641	0.260949	0.00373676
ENSGALG00000035182	CMKLR1	15	96.3156	0.755008	0.352433	0.0321716
ENSGALG00000008270	CALHM2	6	207.684	0.754148	0.232122	0.00115838
ENSGALG00000005259	VIPR1	2	80.8113	0.752796	0.378557	0.0467459
ENSGALG00000038162	FAM26E	3	191.699	0.752459	0.274443	0.00611094
ENSGALG00000030432	RASSF2	22	469.233	0.752168	0.263672	0.00433534
ENSGALG00000003099	PCTP	18	555.503	0.752014	0.25209	0.00285332
ENSGALG00000039786	FGFR1	22	5385.72	0.751905	0.189831	7.46621e-05
ENSGALG00000031637	ICOSLG	1	688.155	0.75158	0.158786	2.20905e-06
ENSGALG00000017050	SMAD9	1	431.035	0.751235	0.275364	0.00636899
ENSGALG00000013102	COBL	2	302.574	0.749781	0.202039	0.000206386
ENSGALG00000012401	GPR137C	5	672.547	0.749503	0.173349	1.53459e-05
ENSGALG00000007178	FADS2	5	1710.89	0.749492	0.271245	0.00572455
ENSGALG00000002294	SEMA6A	Z	823.717	0.749256	0.297535	0.0117951
ENSGALG00000034722	TLR2A	4	142.515	0.748054	0.274356	0.00639947
ENSGALG00000010806	RIN3	5	401.555	0.745978	0.231768	0.00128799
ENSGALG00000053285		25	954.918	0.744807	0.224161	0.000891701
ENSGALG00000049684		2	142.661	0.744632	0.274017	0.00657836
ENSGALG00000014758	ARHGAP28	2	1347.84	0.744381	0.232213	0.00134785
ENSGALG00000011493	TMEM169	7	576.819	0.744333	0.231502	0.00130336
ENSGALG00000021171		10	370.467	0.743613	0.245329	0.00243675
ENSGALG00000031519	KHDRBS3	2	2069.7	0.743462	0.206177	0.00031103
ENSGALG00000045350		4	1380.02	0.743166	0.15928	3.07445e-06
ENSGALG00000008514	DLL4	5	228.018	0.742782	0.340372	0.0290899
ENSGALG00000007710		4	1635.6	0.742741	0.204044	0.000272527
ENSGALG00000016967	ENOX1	1	1063.53	0.742532	0.181184	4.16345e-05
ENSGALG00000015822		1	125.262	0.741813	0.286503	0.00961988
ENSGALG00000047652		1	56.2854	0.741289	0.339931	0.0292053
ENSGALG00000004360		13	63.2938	0.739742	0.329066	0.0245759
ENSGALG00000043213	CYP26C1	6	91.2084	0.737399	0.300834	0.014239
ENSGALG00000053862		25	176.605	0.737218	0.309479	0.0172129
ENSGALG00000006080	GPC4	4	6403.1	0.737142	0.249942	0.00318547
ENSGALG00000006638	GRIK4	24	69.4355	0.736843	0.322642	0.0223845
ENSGALG00000054942		Z	247.227	0.736574	0.193307	0.000138751
ENSGALG00000015722	TMED11	4	177.417	0.736403	0.313108	0.0186769
ENSGALG00000013112	RERGL	1	388.194	0.734323	0.194665	0.000161784
ENSGALG00000019622	TRIM71	2	118.948	0.733976	0.300286	0.0145152
ENSGALG00000003412		17	1432.96	0.733604	0.207771	0.000414253
ENSGALG00000052514		28	254.199	0.732585	0.241326	0.0024
ENSGALG00000003242	STAR	22	55.3624	0.731643	0.359826	0.0420199
ENSGALG00000006751	THY1	24	1291.5	0.73147	0.25059	0.00351164
ENSGALG00000047764	HSPB3	Z	3945.12	0.73141	0.182917	6.37209e-05
ENSGALG00000030008	HHEX	6	1606.72	0.730919	0.207188	0.000419017
ENSGALG00000007168	CFAP20DC	12	119.46	0.729772	0.23828	0.00219376
ENSGALG00000005643	LYVE1	5	261.496	0.729002	0.276633	0.00840708
ENSGALG00000006588		15	429.554	0.728854	0.248365	0.00333964
ENSGALG00000004519	TRPV2	19	386.009	0.728684	0.228342	0.00141688
ENSGALG00000009439	GPR85	1	46.3232	0.728239	0.348945	0.0368906
ENSGALG00000054783	NDRG1	2	1865.36	0.727478	0.202613	0.000330061
ENSGALG00000005345	CABLES2	20	576.881	0.725675	0.200012	0.000285447
ENSGALG00000051077		17	451.488	0.725128	0.288195	0.011866
ENSGALG00000002622	FCHSD1	13	191.041	0.724462	0.272429	0.00783099
ENSGALG00000040001		1	261.631	0.722414	0.245371	0.00323817
ENSGALG00000030845	ENHO	Z	216.704	0.720836	0.229342	0.00167194
ENSGALG00000040023	MAPK11	1	667.283	0.719993	0.173157	3.21011e-05
ENSGALG00000053043	CARHSP1	14	3839.52	0.719767	0.169589	2.19382e-05
ENSGALG00000016293	BMP5	3	7150.24	0.719196	0.243332	0.00312047
ENSGALG00000034024	RAPGEF5	2	861.638	0.717759	0.247484	0.00372902
ENSGALG00000005473	PNAT3	11	153.434	0.717604	0.314912	0.0226825
ENSGALG00000031398		7	807.172	0.717289	0.32844	0.0289673
ENSGALG00000043053	DAO	15	141.426	0.716834	0.22753	0.00162992
ENSGALG00000028005	GADD45G	Z	382.779	0.716507	0.208035	0.000572809
ENSGALG00000015029	EVC2	4	639.174	0.715547	0.221436	0.0012319
ENSGALG00000036942	KCNA3	26	57.5986	0.714854	0.364099	0.0496056
ENSGALG00000019768	ACSF2	18	1460.52	0.714487	0.199205	0.000334904
ENSGALG00000044388		13	93.4483	0.714439	0.327604	0.0291982
ENSGALG00000026258	MAF	11	1084.56	0.714372	0.209328	0.000643243
ENSGALG00000016636	ARSH	1	507.937	0.713616	0.243259	0.00335092
ENSGALG00000038043	HECTD2	6	223.687	0.713362	0.328741	0.030008
ENSGALG00000006087	GPC3	4	134.558	0.7131	0.243201	0.00336635
ENSGALG00000002577		13	98.3023	0.712381	0.312414	0.0225932
ENSGALG00000041744	OTOS	9	202.93	0.71113	0.221621	0.00133306
ENSGALG00000048159		17	383.771	0.709387	0.194797	0.000270863
ENSGALG00000014976	GATA6	2	2082.08	0.709237	0.213851	0.000911513
ENSGALG00000036916		12	77.2999	0.708533	0.289049	0.0142359
ENSGALG00000038629	EFNA2	28	136.23	0.707789	0.253127	0.005171
ENSGALG00000001531	FN3K	18	103.892	0.707343	0.2831	0.0124697
ENSGALG00000054678		10	103.225	0.706842	0.324882	0.0295786
ENSGALG00000012681	MBOAT1	2	68.2522	0.705752	0.310308	0.0229441
ENSGALG00000010326	FLVCR2	5	171.883	0.70516	0.247383	0.00436538
ENSGALG00000029118		Z	641.816	0.704384	0.214756	0.00103835
ENSGALG00000011902	TAGLN	24	963.124	0.704222	0.28807	0.0145005
ENSGALG00000009047	YPEL5	3	4241.05	0.703353	0.162336	1.47291e-05
ENSGALG00000041353	TP53INP1	2	2212.01	0.703289	0.166719	2.46036e-05
ENSGALG00000037214		4	124.277	0.703218	0.343259	0.0404965
ENSGALG00000014973	GPR156	1	60.7442	0.702872	0.326437	0.031306
ENSGALG00000032190	MICAL1	26	156.521	0.702672	0.302141	0.0200376
ENSGALG00000014999	MAP1B	Z	2728.87	0.702166	0.293558	0.0167607
ENSGALG00000005519	TLL2	6	304.961	0.701912	0.23581	0.00291469
ENSGALG00000026241	GRIN3B	28	400.772	0.700105	0.280044	0.01242
ENSGALG00000009792		4	154.439	0.699847	0.244064	0.00413769
ENSGALG00000014213	PRR5	1	453.893	0.699129	0.352725	0.0474703
ENSGALG00000007920	PRR5L	5	511.924	0.698626	0.247362	0.00473827
ENSGALG00000054469	DISP1	3	2137.07	0.69838	0.269104	0.00945331
ENSGALG00000017658	GAS1	Z	673.977	0.697153	0.244678	0.00438199
ENSGALG00000027983		9	901.369	0.696496	0.243173	0.00418065
ENSGALG00000015037	EVC	4	1154.91	0.696235	0.184205	0.000157038
ENSGALG00000039354	VTG1	8	75.6022	0.694275	0.34107	0.0417924
ENSGALG00000006796	SRPX2	4	348.499	0.694194	0.251128	0.00570451
ENSGALG00000010016	SOCS5	3	1105.65	0.693343	0.179969	0.000116886
ENSGALG00000042354	PREX2	2	317.063	0.693043	0.282442	0.0141372
ENSGALG00000014749	EPHB6	1	975.439	0.693038	0.217431	0.00143565
ENSGALG00000002963	PID1	9	935.772	0.692641	0.236139	0.00335496
ENSGALG00000008589	CMKLR2	7	285.484	0.692617	0.229898	0.00258924
ENSGALG00000016633	HMBOX1	3	611.346	0.692214	0.349598	0.0477006
ENSGALG00000011549	ANKS1B	1	264.206	0.691311	0.216461	0.00140461
ENSGALG00000006724		9	2353.02	0.691311	0.245168	0.00480615
ENSGALG00000042227	GNLY	22	148.018	0.691225	0.288553	0.0165983
ENSGALG00000035060	FKBP11	33	216.717	0.69028	0.307756	0.0249004
ENSGALG00000001161	FLI1	24	3028.04	0.690256	0.160887	1.78415e-05
ENSGALG00000015593	EPHA7	3	1518.15	0.689845	0.327814	0.0353452
ENSGALG00000047864		5	210.169	0.68785	0.294138	0.0193599
ENSGALG00000035935		10	499.988	0.687495	0.283972	0.015478
ENSGALG00000047827	TMEM86A	5	386.405	0.686317	0.249541	0.00595379
ENSGALG00000016202	HSF2BP	1	529.853	0.68589	0.16573	3.49421e-05
ENSGALG00000000731	THEMIS2	23	124.479	0.685621	0.264718	0.00959746
ENSGALG00000042177	GPR182	33	96.1649	0.685265	0.278073	0.013727
ENSGALG00000015322	IMPG2	1	99.6218	0.685246	0.32115	0.0328655
ENSGALG00000028017	EFCAB2	3	113.176	0.684702	0.29996	0.0224515
ENSGALG00000020726		6	102.255	0.684313	0.326464	0.03607
ENSGALG00000033694	IFI30	28	303.434	0.683831	0.29289	0.0195554
ENSGALG00000050885		10	97.9063	0.683615	0.321112	0.0332623
ENSGALG00000032984	MEX3B	10	2259.08	0.682025	0.212142	0.00130471
ENSGALG00000014179	SBK1	14	63.3115	0.681584	0.317182	0.0316443
ENSGALG00000006786	SYTL4	4	544.775	0.681297	0.181897	0.000180036
ENSGALG00000016881	GPR183	1	212.289	0.680545	0.262336	0.00948191
ENSGALG00000013929	PDGFRA	4	3808.91	0.679737	0.243043	0.00516153
ENSGALG00000005831	DNAI1	Z	113.644	0.679673	0.287116	0.0179213
ENSGALG00000007018	SLC26A11	18	285.388	0.675723	0.226761	0.00288355
ENSGALG00000013505	SYNE1	3	1659.61	0.675248	0.298258	0.0235759
ENSGALG00000005120	FBLN2	12	5721.62	0.675018	0.278778	0.0154631
ENSGALG00000030673		5	386.591	0.674542	0.249802	0.00692762
ENSGALG00000035718	DOK1	4	191.624	0.674063	0.283175	0.0172949
ENSGALG00000040527		5	607.511	0.673329	0.189688	0.00038572
ENSGALG00000004841	APLNR	5	528.875	0.672624	0.290237	0.0204764
ENSGALG00000015216	SYK	Z	211.968	0.672198	0.256129	0.00867895
ENSGALG00000029502	CLIC2	4	948.059	0.670985	0.262072	0.0104579
ENSGALG00000003792	FYB	Z	152.074	0.670774	0.314371	0.0328672
ENSGALG00000002623	PCOLCE2	9	360.184	0.669264	0.234667	0.00434489
ENSGALG00000000529	LIMD2	27	2088.81	0.668883	0.243662	0.00604874
ENSGALG00000009280	NPY2R	4	149.095	0.668751	0.284465	0.0187276
ENSGALG00000034118	SOX18	20	401.078	0.667584	0.256145	0.00915339
ENSGALG00000032854	ACP5	30	185.889	0.667185	0.291051	0.0218865
ENSGALG00000031284	PTPRM	2	1653.99	0.667089	0.228356	0.00348615
ENSGALG00000007357	BCL6	9	819.823	0.667068	0.245751	0.00663944
ENSGALG00000009800	SETD7	4	963.497	0.666191	0.20406	0.00109589
ENSGALG00000026983	CHRD	9	326.617	0.665495	0.229537	0.00373999
ENSGALG00000013272	PRMT8	1	735.87	0.662894	0.190506	0.000502079
ENSGALG00000002242	GALNT9	15	68.1963	0.66269	0.329114	0.0440556
ENSGALG00000016359	FBXO25	3	653.539	0.662537	0.222759	0.00293722
ENSGALG00000011715	HSPA2	5	5534.42	0.66252	0.219474	0.00253882
ENSGALG00000036218	RAB4A	3	1276.25	0.662223	0.143823	4.13613e-06
ENSGALG00000009275	TMEM63A	3	820.131	0.661939	0.237789	0.00537396
ENSGALG00000008393	CREB3L1	5	859.114	0.660836	0.258427	0.0105536
ENSGALG00000004234	PGGHG	5	447.094	0.6607	0.181938	0.000281822
ENSGALG00000008040		15	142.762	0.660482	0.274186	0.0160016
ENSGALG00000007582	DPYSL3	13	4488.25	0.659328	0.189368	0.000498185
ENSGALG00000030324	ELAPOR2	1	191.826	0.658033	0.276483	0.0173121
ENSGALG00000010560	EIF2AK2	3	501.716	0.657999	0.208201	0.00157547
ENSGALG00000004221	IL22RA1	23	206.346	0.656507	0.299251	0.0282472
ENSGALG00000039124	KLHL3	13	697.461	0.656275	0.242271	0.0067517
ENSGALG00000025898	SMAD6	10	15292.8	0.655802	0.132169	6.98285e-07
ENSGALG00000016883	DOCK9	1	2656.59	0.65553	0.247753	0.00814742
ENSGALG00000016485	RHOB	3	3968.11	0.655004	0.230095	0.00441799
ENSGALG00000007721	ARHGAP21	2	4633.67	0.654919	0.300212	0.0291446
ENSGALG00000015346	NFKBIZ	1	508.665	0.654843	0.29367	0.0257568
ENSGALG00000030407	IL6R	25	332.841	0.654752	0.268923	0.0149033
ENSGALG00000007511	ITGB2	7	161.533	0.654696	0.257707	0.0110705
ENSGALG00000035184	SDC3	23	411.901	0.653572	0.201595	0.00118692
ENSGALG00000007161	LRRK2	1	1123.23	0.651966	0.321131	0.0423345
ENSGALG00000023437	NQO1	11	135.862	0.651304	0.330045	0.0484522
ENSGALG00000022926	GPR162	1	1433.87	0.651277	0.163702	6.93707e-05
ENSGALG00000013211	ST8SIA1	1	158.149	0.649474	0.287358	0.0238118
ENSGALG00000029533	LRP5	5	677.738	0.648398	0.297115	0.0290863
ENSGALG00000038556	CDC42EP1	1	968.731	0.647757	0.168131	0.000116822
ENSGALG00000008351	CAV3	12	944.196	0.647614	0.191351	0.000713262
ENSGALG00000035629	GRAMD1C	1	1686.87	0.646581	0.154431	2.82841e-05
ENSGALG00000047636		14	2275.34	0.646024	0.192551	0.000793437
ENSGALG00000003499	MAST3	28	685.79	0.645578	0.195118	0.00093746
ENSGALG00000032469	ARHGAP45	28	477.242	0.645272	0.257829	0.0123247
ENSGALG00000051082		3	1161.02	0.645019	0.186011	0.000525054
ENSGALG00000029680		12	624.188	0.644741	0.18352	0.000442754
ENSGALG00000007837	KAZALD1	6	1368.86	0.642531	0.26283	0.0144988
ENSGALG00000023882	MALL	3	219.721	0.639737	0.264782	0.0156884
ENSGALG00000033932	BF1	16	431.267	0.639709	0.281014	0.0228201
ENSGALG00000007253	IL1RAP	9	597.899	0.638582	0.172099	0.000206813
ENSGALG00000003885		8	219.928	0.638177	0.251843	0.011276
ENSGALG00000006826	KLHL25	10	409.046	0.638115	0.21852	0.0034985
ENSGALG00000043089	VWCE	5	259.42	0.637761	0.322988	0.0483174
ENSGALG00000032031	MMP16	2	682.461	0.637147	0.258928	0.0138662
ENSGALG00000011446	TNFAIP2	5	346.457	0.636752	0.227885	0.0052031
ENSGALG00000007536		9	388.706	0.636362	0.262624	0.015389
ENSGALG00000052774		2	84.6616	0.635743	0.287604	0.0270718
ENSGALG00000030016	CTSB	3	18895.6	0.634688	0.162332	9.23667e-05
ENSGALG00000007000	NR2F2	10	6561.22	0.634332	0.180667	0.000446336
ENSGALG00000031874	HIST1H101	1	1338.81	0.634288	0.170114	0.000192544
ENSGALG00000003932	SDC4	20	1000.87	0.63378	0.182708	0.000522765
ENSGALG00000014943	FAM169A	Z	383.217	0.632578	0.253676	0.012644
ENSGALG00000031425	PMP22	18	2000.76	0.631923	0.18052	0.000464278
ENSGALG00000016721	PLCXD1	1	106.679	0.630698	0.273333	0.0210306
ENSGALG00000009532	GXYLT1	1	2026.79	0.6293	0.163145	0.000114638
ENSGALG00000000736	MATK	28	101.11	0.628971	0.308844	0.0416969
ENSGALG00000021193	STARD5	10	216.317	0.627643	0.225109	0.00530053
ENSGALG00000047321		17	635.994	0.626538	0.238673	0.00866263
ENSGALG00000015203		28	165.507	0.624547	0.218284	0.00422087
ENSGALG00000026426		2	301.358	0.624346	0.287533	0.0299019
ENSGALG00000000761	TSKU	1	1939.59	0.624136	0.181553	0.000586546
ENSGALG00000012885	BCL2	2	276.23	0.623648	0.29071	0.0319324
ENSGALG00000011149	PLA2R1	7	1972.12	0.623281	0.198952	0.00173132
ENSGALG00000003819		14	181.438	0.622755	0.215404	0.00383887
ENSGALG00000006705		6	942.117	0.622738	0.249139	0.0124347
ENSGALG00000012126	CFI	4	115.962	0.622291	0.243674	0.0106559
ENSGALG00000015895	HTR1B	3	1240.36	0.621565	0.238255	0.0090856
ENSGALG00000051442	TSC22D1	1	2656.36	0.621555	0.222754	0.00526559
ENSGALG00000040275	RCSD1	1	8639.03	0.620673	0.181521	0.000627841
ENSGALG00000004614	NPL	8	462.04	0.620568	0.21423	0.0037706
ENSGALG00000016459	LRATD1	3	385.403	0.618557	0.234592	0.00837098
ENSGALG00000051258		6	197.724	0.618395	0.283581	0.0292085
ENSGALG00000009212	MND1	4	1545.41	0.617606	0.181492	0.000666634
ENSGALG00000012952	BASP1	2	5153.93	0.617346	0.274656	0.0245947
ENSGALG00000048178	SLC27A3	25	1165.96	0.614587	0.265355	0.020553
ENSGALG00000003106	TOX2	20	358.35	0.614211	0.236289	0.00933863
ENSGALG00000027476	PLEKHG5	21	247.292	0.614067	0.225297	0.00641868
ENSGALG00000028069	WNT16	1	169.769	0.613995	0.268658	0.0222883
ENSGALG00000016294	HMGCLL1	3	480.513	0.613061	0.223761	0.00614756
ENSGALG00000039200	AXIN2	18	415.848	0.612341	0.232253	0.00837606
ENSGALG00000020939	SLC35C2	20	1265.64	0.611354	0.214271	0.00432848
ENSGALG00000015425	LPL	Z	3849.71	0.610304	0.18283	0.000843573
ENSGALG00000032526	B3GNT5	9	1072.87	0.609632	0.198985	0.00218609
ENSGALG00000038336	SLC20A2	4	1490.08	0.609495	0.234604	0.00937764
ENSGALG00000004569	UNC5B	6	2145.94	0.609319	0.230817	0.00829452
ENSGALG00000001470	STOML1	10	372.363	0.609263	0.210333	0.00377152
ENSGALG00000016471		3	412.219	0.609061	0.234301	0.00933648
ENSGALG00000037726	MARCKS	3	4905.06	0.608188	0.244021	0.0126899
ENSGALG00000038772	RNF19A	2	1477.57	0.607982	0.205871	0.0031448
ENSGALG00000023542	ALPL	21	754.162	0.607172	0.211111	0.00402652
ENSGALG00000035387	TMEM240	21	110.068	0.607155	0.283781	0.0323934
ENSGALG00000010579	STON2	5	118.27	0.606685	0.277606	0.0288584
ENSGALG00000036829	RECK	2	1908.06	0.606585	0.152536	6.98847e-05
ENSGALG00000041650	DUSP7	12	1550.36	0.606241	0.220232	0.00590985
ENSGALG00000005351	PRDM6	Z	259.818	0.605021	0.280726	0.0311459
ENSGALG00000048488		6	151.276	0.601381	0.272074	0.0270802
ENSGALG00000011998	SEC24D	4	1398.11	0.599847	0.264591	0.0233857
ENSGALG00000000003	PANX2	1	156.683	0.599776	0.224802	0.00763
ENSGALG00000002080	DOCK2	13	146.927	0.59932	0.234442	0.0105771
ENSGALG00000031159	HIST1H110	1	248.509	0.598205	0.235859	0.0112037
ENSGALG00000038710	MANSC1	1	504.595	0.597119	0.212378	0.00492971
ENSGALG00000002167	PATL2	10	96.873	0.596334	0.28285	0.0350049
ENSGALG00000035950	NGFR	27	342.437	0.596332	0.179303	0.000881528
ENSGALG00000012010	NDST3	4	435.165	0.596166	0.252956	0.0184334
ENSGALG00000050176		19	530.584	0.59542	0.303186	0.049544
ENSGALG00000035769		3	1378.42	0.59508	0.153173	0.000102327
ENSGALG00000018702		25	450.428	0.595076	0.273341	0.029477
ENSGALG00000031734	AQP11	1	121.524	0.595004	0.26	0.0221099
ENSGALG00000032313	KDELR3	1	1462.51	0.594904	0.16436	0.000295149
ENSGALG00000004309	GDAP1L1	20	127.019	0.592338	0.273178	0.0301343
ENSGALG00000015842	TIAM1	1	1415.02	0.59193	0.243174	0.0149254
ENSGALG00000008445	SLC24A3	3	224.014	0.591509	0.251334	0.0185985
ENSGALG00000038529	PLPPR3	28	392.432	0.59144	0.199304	0.00300214
ENSGALG00000030800	IL31RA	Z	108.805	0.591271	0.264354	0.0253083
ENSGALG00000033198	MYO5C	10	300.548	0.591237	0.209623	0.00479529
ENSGALG00000016017	SLC4A11	4	163.485	0.589274	0.258955	0.0228709
ENSGALG00000031380	DENND3	2	511.691	0.588574	0.188413	0.00178499
ENSGALG00000034528	SNTB1	2	4190.36	0.588283	0.191679	0.00214706
ENSGALG00000006401	OSBPL5	5	3834.06	0.587687	0.14527	5.22146e-05
ENSGALG00000004398	CARD11	14	905.878	0.5848	0.194523	0.00264421

## Sheet: AT ENRICHED gProfiler
source	term_name	negative_log10_of_adjusted_p_value	term_size	query_size	intersection_size	effective_domain_size	intersections
GO:MF	small molecule binding	9.21872	2516	820	183	18679	DGKI,ACTG2,TRPC5,IRX5,CKMT2,CAMK2A,GADL1,AIFM3,PFKM,KCNJ11,ABCC8,PYGB,TRPV4,ERBB4,SLC2A5,ALPK2,MYLK4,MYH7,ENTPD1,CYP3A4,RAB26,MYLK3,PAK5,GRK5,POPDC2,DYRK3,BMPR1B,CHST15,ACADSB,ACTC1,ADCY3,MB,OGDHL,EPHA5,P2RX5,ENTPD2,NOS1,HPGD,WNK2,KIF21A,MYO18B,FABP1,SRL,GOT1,MOCOS,ERBB3,GLUL,OSBPL3,PRKAA2,EEF2K,MKNK1,PHYH,RHOQ,RASL11B,GCLC,PEAK1,RASL10B,BVES,LDHA,NOX1,SCG5,ADCY7,PCCA,OSBPL6,NMRK2,PRKAG2,ATP11A,I…
GO:MF	actin binding	7.98492	449	820	54	18679	CTNNA3,TRPC5,NRAP,TRPV4,MYH7,TNNC2,MYL3,MYBPC3,PACRG,SORBS1,PRKN,CAP2,NEBL,SNTG2,MYL4,LDB3,ABLIM1,LMOD1,MYO18B,SHTN1,TMOD1,CNN1,XIRP1,HOMER2,ACTN2,SVIL,CFL2,PAWR,ABLIM3,SHROOM3,TNNC1,VASH2,SYNPO2L,CACNB2,MYOM1,TNNT2,CORO6,PHACTR3,PDLIM5,SMTN,EPS8,NEXN,MYOZ1,TNNI1,PARVA,MYO1D,DMD,MSRB1,MYPN,TMOD2,FHOD3,ADSS1,TPM4,MIB2
GO:MF	cytoskeletal protein binding	7.4614	1001	820	90	18679	BMP10,CTNNA3,TRPC5,NRAP,KCNJ11,MTUS1,SCN5A,TRPV4,MYH7,TNNC2,MYL3,MYBPC3,CACNA1C,PACRG,SORBS1,PRKN,ACTC1,CAP2,NEBL,SNTG2,MYL4,SLC8A1,PTPRT,LDB3,ABLIM1,MYL9,FRMD5,KIF21A,LMOD1,MYO18B,SHTN1,TMOD1,CNN1,XIRP1,HOMER2,ACTN2,SVIL,CFL2,PACSIN3,PAWR,EPB41L4A,ABLIM3,SHROOM3,TNNC1,VASH2,SYNPO2L,ALDOC,AGBL5,CACNB2,ANK3,MYOM1,TNNT2,CORO6,PHACTR3,PDLIM5,SMTN,EPS8,NEXN,MYOZ1,HSPB7,TNNI1,KIF25,PARVA,TNNI3K,KIF5C,…
GO:MF	anion binding	7.17394	2413	820	170	18679	DGKI,ACTG2,TRPC5,CKMT2,CAMK2A,GADL1,AIFM3,PFKM,G6PC1,KCNJ11,ABCC8,PYGB,TRPV4,ERBB4,ALPK2,MYLK4,MYH7,ENTPD1,LPAR4,RAB26,MYLK3,PAK5,GRK5,POPDC2,DYRK3,BMPR1B,CHST15,ACADSB,ACTC1,ADCY3,OGDHL,EPHA5,NPR3,CLVS1,P2RX5,ENTPD2,NOS1,HPGD,WNK2,KIF21A,MYO18B,FABP1,SRL,GOT1,MOCOS,ERBB3,GLUL,PRKAA2,SESTD1,ACTN2,EEF2K,SVIL,MKNK1,GAP43,PHYH,RHOQ,RASL11B,GCLC,PEAK1,RASL10B,BVES,SCG5,ADCY7,PCCA,PLEKHN1,NMRK2,PRKAG2…
GO:MF	nucleotide binding	6.06708	2176	820	153	18679	DGKI,ACTG2,CKMT2,CAMK2A,AIFM3,PFKM,KCNJ11,ABCC8,TRPV4,ERBB4,ALPK2,MYLK4,MYH7,ENTPD1,RAB26,MYLK3,PAK5,GRK5,POPDC2,DYRK3,BMPR1B,CHST15,ACADSB,ACTC1,ADCY3,EPHA5,P2RX5,ENTPD2,NOS1,HPGD,WNK2,KIF21A,MYO18B,SRL,ERBB3,GLUL,PRKAA2,EEF2K,MKNK1,RHOQ,RASL11B,GCLC,PEAK1,RASL10B,BVES,LDHA,NOX1,SCG5,ADCY7,PCCA,NMRK2,PRKAG2,ATP11A,IDH3A,PDK1,ABCG1,ADCY6,MAP3K6,ACAT1,DYRK2,GNAO1,SDHA,RHOJ,MFN1,QRSL1,ATP10A,EHHADH…
GO:MF	nucleoside phosphate binding	6.05307	2177	820	153	18679	DGKI,ACTG2,CKMT2,CAMK2A,AIFM3,PFKM,KCNJ11,ABCC8,TRPV4,ERBB4,ALPK2,MYLK4,MYH7,ENTPD1,RAB26,MYLK3,PAK5,GRK5,POPDC2,DYRK3,BMPR1B,CHST15,ACADSB,ACTC1,ADCY3,EPHA5,P2RX5,ENTPD2,NOS1,HPGD,WNK2,KIF21A,MYO18B,SRL,ERBB3,GLUL,PRKAA2,EEF2K,MKNK1,RHOQ,RASL11B,GCLC,PEAK1,RASL10B,BVES,LDHA,NOX1,SCG5,ADCY7,PCCA,NMRK2,PRKAG2,ATP11A,IDH3A,PDK1,ABCG1,ADCY6,MAP3K6,ACAT1,DYRK2,GNAO1,SDHA,RHOJ,MFN1,QRSL1,ATP10A,EHHADH…
GO:MF	calmodulin-dependent protein kinase activity	5.35729	27	820	11	18679	CAMK2A,MYLK3,EEF2K,MKNK1,PHKA2,ITPKA,MAPKAPK2,CAMK2D,CAMK1D,CAMK2G,CAMK1G
GO:MF	ion binding	4.80928	6056	820	339	18679	DGKI,ACTG2,SALL3,TRPC5,ZNF106,CKMT2,CAMK2A,CACNA2D3,MYL10,GADL1,NRAP,AIFM3,PFKM,G6PC1,KCNJ11,ZNF536,ABCC8,NRXN3,ADAMTS20,CDH13,PYGB,TRPV4,S100Z,ACMSD,ERBB4,TMEM163,CACNA1S,SMOC1,ALPK2,MYLK4,MYH7,CRIP2,CA9,ENTPD1,NANOS1,CYP3A4,LPAR4,CPN1,RAB26,MYLK3,PAK5,TNNC2,MYL3,GRK5,SPON2,POPDC2,DYRK3,MYBPC3,BMPR1B,SALL1,AMPD3,CHST15,CACNA1C,VAT1L,OCM2,PLA1A,PTGS2,ITGA7,ACADSB,B3GAT2,PRKN,NRP1,SALL4,ACTC1,ADCY…
GO:MF	oxidoreductase activity	4.0485	770	820	66	18679	AIFM3,ALDH1L2,DMGDH,MAOA,CYP3A4,VAT1L,PTGS2,ACADSB,OGDHL,PDHA2,MSRB3,NOS1,HPGD,TECRL,LOXHD1,CYP4V2,CRAT,PHYH,LDHA,RTN4IP1,RDH10,NOX1,IDH3A,DLAT,CYCS,SDHA,SOD2,EHHADH,LOXL4,NNT,CYBRD1,FMO3,PRDX3,MMACHC,ALDH5A1,PDHX,PTGES2,SDHB,ACADL,DHTKD1,NDUFS1,CYP4F11,ETFDH,UQCRC1,LDHB,MDH2,ACADS,ETFA,NDUFS3,ACAD9,AIFM1,NDUFV1,MSRB1,DHRS7C,GSTK1,HIBADH,MDH1,IDH2,MTHFR,ALDH6A1,COX10,NDUFS2,GAPDH,UQCRQ,COQ6,COX5B
GO:MF	catalytic activity	4.00865	5682	820	317	18679	DGKI,PPIL6,CKMT2,CAMK2A,GADL1,HHATL,AIFM3,PFKM,G6PC1,ADAMTS20,PYGB,ALDH1L2,ACMSD,ERBB4,ALPK2,ZDHHC22,MYLK4,GPR88,CELA2A,MYH7,DMGDH,CA9,ENTPD1,IL1RAPL2,MAOA,CYP3A4,CPN1,RAB26,MYLK3,PAK5,RAP1GAP,FBXL22,MYL3,PTPRO,GRK5,DYRK3,BMPR1B,AMPD3,CHST15,VAT1L,PLA1A,PTGS2,UPP1,OTOGL,ACADSB,PLCXD2,B3GAT2,PRKN,NRP1,LRRC2,ADCY3,OGDHL,MBTPS2,EPHA5,INPP4B,PDE1C,PPM1H,PPIF,CORIN,PDHA2,PLPPR1,HACD1,PDE9A,PTPRT,MSRB3…
GO:MF	carbohydrate derivative binding	3.75597	2282	820	149	18679	DGKI,ACTG2,CKMT2,CAMK2A,FGF14,PFKM,KCNJ11,ABCC8,TRPV4,ERBB4,SMOC1,ALPK2,MYLK4,MYH7,ENTPD1,LPAR4,RAB26,MYLK3,PAK5,GRK5,SPON2,SERPINE2,POPDC2,DYRK3,BMPR1B,CHST15,SUSD5,NRP1,ACTC1,ADCY3,EPHA5,LTBP2,CLEC3B,P2RX5,ENTPD2,NOS1,VCAN,FN1,WNK2,KIF21A,MYO18B,SRL,ERBB3,GLUL,PRKAA2,EEF2K,MKNK1,GAP43,RHOQ,RASL11B,GCLC,EGFLAM,PEAK1,RASL10B,BVES,SCG5,ADCY7,PCCA,NMRK2,PRKAG2,ATP11A,PDK1,ABCG1,ADCY6,MAP3K6,ACAT1,D…
GO:MF	transporter activity	3.32223	1186	820	88	18679	KCNH7,TRPC5,GJA8,CACNA2D3,SLC24A2,KCNJ11,ABCC8,KCNJ3,SCN5A,TRPV4,KCNG1,SLC2A5,CACNA1S,GJA5,SLC9A5,KCNG2,CACNA1C,KCNH6,CACNG4,SLC24A5,SLC16A7,SLC38A3,SLC4A5,SLC8A1,P2RX5,SLC16A3,SLC18A2,SLC16A6,SLC25A4,KCNT1,FABP1,OSBPL3,SLC25A12,CPLX3,SLC6A17,GJD2,TMEM150C,PITPNM3,MCOLN2,NOX1,OSBPL6,ATP11A,SLC2A1,ABCG1,SLC5A6,SLC37A1,CACNB2,PLEKHA8,NPC2,ATP10A,ATP9A,NNT,ATP10D,TMEM120A,CNR1,CACNG3,RYR2,LRP2,CNGA3…
GO:MF	calmodulin binding	3.24157	203	820	26	18679	CAMK2A,SCN5A,TRPV4,CACNA1S,MYH7,CACNA1C,ADCY3,PDE1C,SLC8A1,NOS1,FBXL2,RGS1,CNN1,EEF2K,MKNK1,GAP43,PHKA2,RYR2,ITPKA,MYO1D,MAPKAPK2,CAMK2D,CAMK1D,CAMK2G,CAMK1G,KCNN2
GO:MF	structural constituent of muscle	2.99259	43	820	11	18679	MYL3,MYBPC3,NEBL,MYL9,ACTN2,MYL6,MYOM1,SMTN,NEXN,DMD,TPM4
GO:MF	ribonucleotide binding	2.92725	1934	820	127	18679	DGKI,ACTG2,CKMT2,CAMK2A,PFKM,KCNJ11,ABCC8,TRPV4,ERBB4,ALPK2,MYLK4,MYH7,ENTPD1,RAB26,MYLK3,PAK5,GRK5,POPDC2,DYRK3,BMPR1B,CHST15,ACTC1,ADCY3,EPHA5,P2RX5,ENTPD2,NOS1,WNK2,KIF21A,MYO18B,SRL,ERBB3,GLUL,PRKAA2,EEF2K,MKNK1,RHOQ,RASL11B,GCLC,PEAK1,RASL10B,BVES,SCG5,ADCY7,PCCA,NMRK2,PRKAG2,ATP11A,PDK1,ABCG1,ADCY6,MAP3K6,ACAT1,DYRK2,GNAO1,RHOJ,MFN1,QRSL1,ATP10A,WNK1,ATP9A,ATP10D,RHOBTB3,TEC,RND2,CNGA3,TRAP…
GO:MF	adenyl ribonucleotide binding	2.85809	1564	820	107	18679	DGKI,ACTG2,CKMT2,CAMK2A,PFKM,KCNJ11,ABCC8,TRPV4,ERBB4,ALPK2,MYLK4,MYH7,ENTPD1,MYLK3,PAK5,GRK5,POPDC2,DYRK3,BMPR1B,CHST15,ACTC1,ADCY3,EPHA5,P2RX5,ENTPD2,WNK2,KIF21A,MYO18B,ERBB3,GLUL,PRKAA2,EEF2K,MKNK1,GCLC,PEAK1,BVES,ADCY7,PCCA,NMRK2,PRKAG2,ATP11A,PDK1,ABCG1,ADCY6,MAP3K6,ACAT1,DYRK2,QRSL1,ATP10A,WNK1,ATP9A,ATP10D,RHOBTB3,TEC,TRAP1,DGKG,KIF25,ITPKA,SUCLA2,ACADL,PASK,TNNI3K,KIF5C,MYO1D,MAPKAPK2,AFG…
GO:MF	actin filament binding	2.84383	213	820	26	18679	CTNNA3,NRAP,TRPV4,MYH7,TNNC2,NEBL,MYL4,ABLIM1,SHTN1,TMOD1,XIRP1,ACTN2,SVIL,CFL2,ABLIM3,SHROOM3,TNNC1,CACNB2,MYOM1,CORO6,NEXN,MYO1D,DMD,FHOD3,ADSS1,TPM4
GO:MF	adenyl nucleotide binding	2.69452	1577	820	107	18679	DGKI,ACTG2,CKMT2,CAMK2A,PFKM,KCNJ11,ABCC8,TRPV4,ERBB4,ALPK2,MYLK4,MYH7,ENTPD1,MYLK3,PAK5,GRK5,POPDC2,DYRK3,BMPR1B,CHST15,ACTC1,ADCY3,EPHA5,P2RX5,ENTPD2,WNK2,KIF21A,MYO18B,ERBB3,GLUL,PRKAA2,EEF2K,MKNK1,GCLC,PEAK1,BVES,ADCY7,PCCA,NMRK2,PRKAG2,ATP11A,PDK1,ABCG1,ADCY6,MAP3K6,ACAT1,DYRK2,QRSL1,ATP10A,WNK1,ATP9A,ATP10D,RHOBTB3,TEC,TRAP1,DGKG,KIF25,ITPKA,SUCLA2,ACADL,PASK,TNNI3K,KIF5C,MYO1D,MAPKAPK2,AFG…
GO:MF	purine ribonucleotide binding	2.68678	1917	820	125	18679	DGKI,ACTG2,CKMT2,CAMK2A,PFKM,KCNJ11,ABCC8,TRPV4,ERBB4,ALPK2,MYLK4,MYH7,ENTPD1,RAB26,MYLK3,PAK5,GRK5,POPDC2,DYRK3,BMPR1B,CHST15,ACTC1,ADCY3,EPHA5,P2RX5,ENTPD2,WNK2,KIF21A,MYO18B,SRL,ERBB3,GLUL,PRKAA2,EEF2K,MKNK1,RHOQ,RASL11B,GCLC,PEAK1,RASL10B,BVES,SCG5,ADCY7,PCCA,NMRK2,PRKAG2,ATP11A,PDK1,ABCG1,ADCY6,MAP3K6,ACAT1,DYRK2,GNAO1,RHOJ,MFN1,QRSL1,ATP10A,WNK1,ATP9A,ATP10D,RHOBTB3,TEC,RND2,CNGA3,TRAP1,DGK…
GO:MF	purine nucleotide binding	2.51932	1932	820	125	18679	DGKI,ACTG2,CKMT2,CAMK2A,PFKM,KCNJ11,ABCC8,TRPV4,ERBB4,ALPK2,MYLK4,MYH7,ENTPD1,RAB26,MYLK3,PAK5,GRK5,POPDC2,DYRK3,BMPR1B,CHST15,ACTC1,ADCY3,EPHA5,P2RX5,ENTPD2,WNK2,KIF21A,MYO18B,SRL,ERBB3,GLUL,PRKAA2,EEF2K,MKNK1,RHOQ,RASL11B,GCLC,PEAK1,RASL10B,BVES,SCG5,ADCY7,PCCA,NMRK2,PRKAG2,ATP11A,PDK1,ABCG1,ADCY6,MAP3K6,ACAT1,DYRK2,GNAO1,RHOJ,MFN1,QRSL1,ATP10A,WNK1,ATP9A,ATP10D,RHOBTB3,TEC,RND2,CNGA3,TRAP1,DGK…
GO:MF	protein binding	2.47063	14767	820	697	18679	NTN1,DGKI,BMP10,PPIL6,NPPC,HAND1,NPPA,EDNRB,LRRC3B,CTNNA3,LRFN5,TRPC5,VEGFD,ZNF106,GREM1,IRX6,CKMT2,CAMK2A,RASGRF1,KLHL34,FSHR,NKX2-5,GJA8,FGF14,KLHL40,PLN,MYL10,MAMDC2,PTGDR,ADCYAP1,NRAP,TAFA2,HHATL,PFKM,G6PC1,KCNJ11,MTUS1,DRAXIN,ABCC8,NRXN3,ANKFN1,KCNJ3,PLEKHA7,BHLHE23,CDH13,PYGB,C1QL4,SCN5A,TRPV4,ALDH1L2,SEMA3C,S100Z,ACMSD,NRN1L,NOTO,ERBB4,CFC1,PROX1,KCNG1,SRCIN1,SLC2A5,CACNA1S,SMOC1,AGTR1,IRF…
GO:MF	identical protein binding	2.35213	2063	820	131	18679	HAND1,VEGFD,GREM1,CAMK2A,GJA8,PLN,PFKM,CDH13,C1QL4,TRPV4,S100Z,NRN1L,ERBB4,SYNDIG1,STOM,RAP1GAP,PTPRO,MYBPC3,STC2,CST3,PTGS2,UPP1,ACADSB,PRKN,NPR3,PPM1H,CLDN2,FHL2,NTSR1,CAP2,PDE9A,PTPRT,CXADR,HPGD,FN1,RASSF3,ZDHHC2,SHTN1,STC1,MGLL,ERBB3,GLUL,HOMER2,ACTN2,SDK1,PACSIN3,PRTG,GIPC2,SLC25A12,TNNC1,PEAK1,PDGFC,LDHA,MCOLN2,KCTD12,KLHL7,FZD4,FBP2,TRIM55,SLC2A1,ABCG1,ESRRG,ACAT1,SHMT1,DLAT,MFN1,MYOM1,SOD…
GO:MF	flavin adenine dinucleotide binding	2.08589	83	820	14	18679	AIFM3,ACADSB,NOS1,SDHA,FMO3,MMACHC,ACADL,ETFDH,ACADS,ETFA,ACAD9,AIFM1,MTHFR,COQ6
GO:MF	phosphotransferase activity, alcohol group as acceptor	2.0693	690	820	55	18679	DGKI,CAMK2A,PFKM,G6PC1,ERBB4,ALPK2,MYLK4,MYLK3,PAK5,GRK5,DYRK3,BMPR1B,NRP1,EPHA5,WNK2,ERBB3,PRKAA2,EEF2K,MKNK1,PEAK1,NMRK2,PRKAG2,PHKA2,PDK1,MAP3K6,DYRK2,WNK1,TEC,DGKG,ITPKA,PASK,TNNI3K,MAPKAPK2,PFKL,GRK3,NRBP2,NIM1K,JAK1,PFKP,AAK1,ETNK2,TGFBR3,ALPK3,TESK1,OXSR1,CAMK2D,MASTL,PRKCB,CAMK1D,MUSK,CAMK2G,STK32C,RPS6KA2,CAMK1G,CDK14
GO:MF	ATP binding	1.82149	1500	820	99	18679	DGKI,ACTG2,CKMT2,CAMK2A,PFKM,KCNJ11,ABCC8,TRPV4,ERBB4,ALPK2,MYLK4,MYH7,ENTPD1,MYLK3,PAK5,GRK5,DYRK3,BMPR1B,ACTC1,ADCY3,EPHA5,P2RX5,ENTPD2,WNK2,KIF21A,MYO18B,ERBB3,GLUL,PRKAA2,EEF2K,MKNK1,GCLC,PEAK1,ADCY7,PCCA,NMRK2,PRKAG2,ATP11A,PDK1,ABCG1,ADCY6,MAP3K6,DYRK2,QRSL1,ATP10A,WNK1,ATP9A,ATP10D,RHOBTB3,TEC,TRAP1,DGKG,KIF25,ITPKA,SUCLA2,PASK,TNNI3K,KIF5C,MYO1D,MAPKAPK2,AFG1L,PFKL,HSPD1,GRK3,NRBP2,NIM1K,…
GO:MF	calcium ion transmembrane transporter activity	1.82057	135	820	18	18679	TRPC5,CACNA2D3,SLC24A2,TRPV4,CACNA1S,CACNA1C,CACNG4,SLC24A5,SLC8A1,MCOLN2,CACNB2,CNR1,CACNG3,RYR2,SLC24A4,ATP2A2,FKBP1B,CACNG5
GO:MF	NAD binding	1.80594	56	820	11	18679	HPGD,LDHA,IDH3A,EHHADH,NNT,NDUFV1,HIBADH,MDH1,IDH2,NDUFS2,GAPDH
GO:MF	ion transmembrane transporter activity	1.78708	845	820	63	18679	KCNH7,TRPC5,CACNA2D3,SLC24A2,KCNJ11,ABCC8,KCNJ3,SCN5A,TRPV4,KCNG1,CACNA1S,SLC9A5,KCNG2,CACNA1C,KCNH6,CACNG4,SLC24A5,SLC16A7,SLC38A3,SLC4A5,SLC8A1,P2RX5,SLC16A3,SLC18A2,SLC25A4,KCNT1,SLC25A12,TMEM150C,MCOLN2,NOX1,SLC2A1,SLC5A6,SLC37A1,CACNB2,NNT,TMEM120A,CNR1,CACNG3,RYR2,CNGA3,ATP5MC1,CLIC5,MPC1L,SLC24A4,ATP8A1,SLC5A11,SLC19A2,ATP2A2,SLC4A7,SLC7A1,FKBP1B,SLC7A5,GABRG1,CACNG5,MFSD12,MPC2,SLC25A15,S…
GO:MF	transmembrane transporter activity	1.74786	1080	820	76	18679	KCNH7,TRPC5,GJA8,CACNA2D3,SLC24A2,KCNJ11,ABCC8,KCNJ3,SCN5A,TRPV4,KCNG1,SLC2A5,CACNA1S,GJA5,SLC9A5,KCNG2,CACNA1C,KCNH6,CACNG4,SLC24A5,SLC16A7,SLC38A3,SLC4A5,SLC8A1,P2RX5,SLC16A3,SLC18A2,SLC16A6,SLC25A4,KCNT1,SLC25A12,CPLX3,SLC6A17,GJD2,TMEM150C,MCOLN2,NOX1,SLC2A1,ABCG1,SLC5A6,SLC37A1,CACNB2,NNT,TMEM120A,CNR1,CACNG3,RYR2,CNGA3,SLC7A4,ATP5MC1,GJC3,CLIC5,MPC1L,SLC24A4,ATP8A1,SLC5A11,SLC19A2,ATP2A2,SL…
GO:MF	tropomyosin binding	1.64457	16	820	6	18679	NEBL,LMOD1,TMOD1,TNNT2,SMTNL2,TMOD2
GO:CC	sarcomere	26.476	211	819	57	18964	BMP10,KLHL40,NRAP,SCN5A,CACNA1S,MYH7,TNNC2,FBXL22,MYL3,MYBPC3,CACNA1C,ACTC1,PPP1R12B,FHL2,NEBL,MYL4,SLC8A1,LDB3,LRRC39,MYL9,LMOD1,MYO18B,TMOD1,SMPX,ACTN2,CFL2,TNNC1,MYBPHL,SYNPO2L,FBP2,SLC2A1,C10ORF71,ITGB1BP2,ANK3,MYOM1,TNNT2,PDLIM5,NEXN,MYOZ1,RYR2,TNNI1,PARVA,OBSL1,SMTNL2,DMD,MYPN,TMOD2,ACTA1,HSPB1,FKBP1B,PPP2R5A,FHOD3,DES,CASQ2,TPM4,STYXL2,KCNN2
GO:CC	myofibril	24.8198	234	819	58	18964	BMP10,KLHL40,NRAP,SCN5A,CACNA1S,MYH7,TNNC2,FBXL22,MYL3,MYBPC3,CACNA1C,ACTC1,PPP1R12B,FHL2,NEBL,MYL4,SLC8A1,LDB3,LRRC39,MYL9,LMOD1,MYO18B,TMOD1,SMPX,ACTN2,SVIL,CFL2,TNNC1,MYBPHL,SYNPO2L,FBP2,SLC2A1,C10ORF71,ITGB1BP2,ANK3,MYOM1,TNNT2,PDLIM5,NEXN,MYOZ1,RYR2,TNNI1,PARVA,OBSL1,SMTNL2,DMD,MYPN,TMOD2,ACTA1,HSPB1,FKBP1B,PPP2R5A,FHOD3,DES,CASQ2,TPM4,STYXL2,KCNN2
GO:CC	contractile fiber	23.9928	242	819	58	18964	BMP10,KLHL40,NRAP,SCN5A,CACNA1S,MYH7,TNNC2,FBXL22,MYL3,MYBPC3,CACNA1C,ACTC1,PPP1R12B,FHL2,NEBL,MYL4,SLC8A1,LDB3,LRRC39,MYL9,LMOD1,MYO18B,TMOD1,SMPX,ACTN2,SVIL,CFL2,TNNC1,MYBPHL,SYNPO2L,FBP2,SLC2A1,C10ORF71,ITGB1BP2,ANK3,MYOM1,TNNT2,PDLIM5,NEXN,MYOZ1,RYR2,TNNI1,PARVA,OBSL1,SMTNL2,DMD,MYPN,TMOD2,ACTA1,HSPB1,FKBP1B,PPP2R5A,FHOD3,DES,CASQ2,TPM4,STYXL2,KCNN2
GO:CC	I band	19.7727	141	819	41	18964	BMP10,KLHL40,NRAP,SCN5A,CACNA1S,MYH7,FBXL22,MYL3,CACNA1C,ACTC1,PPP1R12B,FHL2,NEBL,SLC8A1,LDB3,MYL9,MYO18B,ACTN2,CFL2,SYNPO2L,FBP2,SLC2A1,C10ORF71,ITGB1BP2,ANK3,PDLIM5,NEXN,MYOZ1,RYR2,PARVA,OBSL1,SMTNL2,DMD,MYPN,HSPB1,FKBP1B,PPP2R5A,FHOD3,DES,CASQ2,KCNN2
GO:CC	Z disc	16.451	129	819	36	18964	BMP10,NRAP,SCN5A,MYH7,FBXL22,CACNA1C,PPP1R12B,FHL2,NEBL,SLC8A1,LDB3,MYL9,MYO18B,ACTN2,CFL2,SYNPO2L,FBP2,SLC2A1,C10ORF71,ITGB1BP2,ANK3,PDLIM5,NEXN,MYOZ1,RYR2,PARVA,OBSL1,DMD,MYPN,HSPB1,FKBP1B,PPP2R5A,FHOD3,DES,CASQ2,KCNN2
GO:CC	mitochondrion	15.8266	1678	819	152	18964	CKMT2,CAMK2A,PLN,MYL10,AIFM3,KCNJ11,MTUS1,ABCC8,ALDH1L2,ERBB4,DMGDH,MAOA,STOM,PAK5,GRAMD4,ACADSB,PRKN,NRP1,SLC25A34,OGDHL,PPIF,NTSR1,PDHA2,SLC8A1,MSRB3,NOS1,NAT8L,SLC25A4,GLUL,FBXL4,METAP1D,CRAT,MGARP,PHYH,SLC25A12,GCLC,ACAA2,RTN4IP1,CS,IMMT,PCCA,PLEKHN1,IDH3A,PDK1,ABCG1,ACAT1,DLAT,ACO2,CYCS,SDHA,MFN1,QRSL1,SOD2,NNT,LACTB2,PDZD8,ABAT,CYRIB,CNR1,BCL2L13,OXCT1,PRDX3,AKAP1,GOT2,LPIN1,ALDH5A1,PDHX,MR…
GO:CC	mitochondrial matrix	15.3361	482	819	69	18964	ALDH1L2,ERBB4,DMGDH,ACADSB,OGDHL,PPIF,PDHA2,NAT8L,ACAA2,CS,PCCA,IDH3A,PDK1,ACAT1,DLAT,ACO2,SOD2,LACTB2,ABAT,OXCT1,PRDX3,GOT2,ALDH5A1,PDHX,MRPS22,TRAP1,SUCLA2,ACADL,DHTKD1,NDUFS1,ETFDH,MDH2,PDSS1,ACADS,ETFA,MRM1,PMPCA,MTERF2,NDUFS3,HSPD1,GFM1,TIMM44,GSTK1,MRPS9,NR3C1,YARS2,ISCU,DBT,HIBADH,ALAS1,ECI1,MRPL15,MIPEP,MRPS5,DLST,LRPPRC,PPM1K,IDH2,OAT,SUCLG1,NFS1,PPTC7,ALDH6A1,MRPL22,DNAJA3,NDUFS2,MCAT,F…
GO:CC	cytoplasm	11.6371	11951	819	618	18964	NTN1,DGKI,BMP10,PPIL6,NPPC,HAND1,NPPA,ACTG2,CTNNA3,TRPC5,VEGFD,ZNF106,CWH43,CKMT2,CAMK2A,RASGRF1,BRINP2,FSHR,FGF14,KLHL40,PLN,MYL10,MAMDC2,GADL1,NRAP,TAFA2,IRX3,HHATL,AIFM3,PFKM,G6PC1,KCNJ11,MTUS1,ABCC8,PLEKHA7,CDH13,PYGB,SCN5A,TRPV4,ALDH1L2,ACMSD,ERBB4,PROX1,TMEM163,SRCIN1,SLC2A5,CACNA1S,RPL3L,IRF4,ZDHHC22,GPR88,CELA2A,MYH7,SEMA3B,CD164,DMGDH,CRIP2,SYNDIG1,RGS10,NANOS1,MAOA,CYP3A4,TXLNB,CCDC141,…
GO:CC	cell junction	8.63658	2107	819	156	18964	DGKI,CTNNA3,LRFN5,CAMK2A,GJA8,ADCYAP1,LYPD1,NRAP,KCNJ11,ABCC8,KCNJ3,PLEKHA7,CDH13,SCN5A,TRPV4,ERBB4,TMEM163,SRCIN1,SYNDIG1,RGS10,IL1RAPL2,GJA5,EPCAM,RAB26,PAK5,PTPRO,SERPINE2,CACNA1C,CACNG4,SORBS1,PRKN,NRP1,ACTC1,FHL1,PPM1H,CLDN2,FHL2,NTSR1,CAP2,SLC8A1,PTPRT,LDB3,P2RX5,PKP2,CXADR,SLC16A3,SLC18A2,NOS1,ZDHHC2,AFAP1L1,MCTP1,IGSF5,SNCB,FRMD5,ADGRL2,GOT1,CNN1,SMPX,FRRS1L,GLUL,XIRP1,HOMER2,ACTN2,EEF2K,…
GO:CC	sarcolemma	8.37966	141	819	28	18964	KCNJ11,ABCC8,KCNJ3,SCN5A,SLC2A5,CACNA1S,POPDC2,SGCD,CACNA1C,CACNG4,SNTG2,SLC8A1,PDE9A,NOS1,BVES,SSPN,SLMAP,SGCA,SLC2A1,CACNB2,ANK3,RYR2,GOT2,AKAP6,DMD,CAMK2D,DES,KCNN2
GO:CC	myofilament	8.12401	27	819	13	18964	TNNC2,MYBPC3,LMOD1,TMOD1,TNNC1,MYBPHL,MYOM1,TNNT2,TNNI1,TMOD2,ACTA1,FHOD3,TPM4
GO:CC	supramolecular fiber	8.09595	997	819	90	18964	BMP10,ACTG2,KLHL40,NRAP,MTUS1,SCN5A,TRPV4,CACNA1S,MYH7,TNNC2,FBXL22,MYL3,MYBPC3,CACNA1C,NRP1,ACTC1,PPP1R12B,FHL2,BFSP2,NEBL,MYL4,SLC8A1,LDB3,PKP2,LRRC39,MYL9,RASSF3,ARHGAP18,KIF21A,LMOD1,MYO18B,SHTN1,TMOD1,SMPX,KRT13,ACTN2,SVIL,CFL2,PAWR,RHOQ,SHROOM3,TNNC1,MYBPHL,SYNPO2L,FBP2,TRIM55,ELN,SLC2A1,C10ORF71,ITGB1BP2,ANK3,MYOM1,TNNT2,PDLIM5,SMTN,NEXN,MYOZ1,RYR2,TNNI1,KIF25,PARVA,OBSL1,KIF5C,SMTNL2,DYNL…
GO:CC	supramolecular polymer	7.90987	1005	819	90	18964	BMP10,ACTG2,KLHL40,NRAP,MTUS1,SCN5A,TRPV4,CACNA1S,MYH7,TNNC2,FBXL22,MYL3,MYBPC3,CACNA1C,NRP1,ACTC1,PPP1R12B,FHL2,BFSP2,NEBL,MYL4,SLC8A1,LDB3,PKP2,LRRC39,MYL9,RASSF3,ARHGAP18,KIF21A,LMOD1,MYO18B,SHTN1,TMOD1,SMPX,KRT13,ACTN2,SVIL,CFL2,PAWR,RHOQ,SHROOM3,TNNC1,MYBPHL,SYNPO2L,FBP2,TRIM55,ELN,SLC2A1,C10ORF71,ITGB1BP2,ANK3,MYOM1,TNNT2,PDLIM5,SMTN,NEXN,MYOZ1,RYR2,TNNI1,KIF25,PARVA,OBSL1,KIF5C,SMTNL2,DYNL…
GO:CC	mitochondrial membrane	6.4013	750	819	70	18964	CKMT2,PLN,AIFM3,MAOA,GRAMD4,PRKN,NRP1,SLC25A34,PPIF,NAT8L,SLC25A4,CRAT,MGARP,SLC25A12,RTN4IP1,IMMT,PLEKHN1,CYCS,SDHA,MFN1,NNT,CNR1,BCL2L13,AKAP1,GOT2,LPIN1,MRPS22,TRAP1,ATP5MC1,SDHB,ACADL,NDUFS1,FAM162A,ETFDH,COQ10A,UQCRC1,PMPCA,NDUFS3,MPC1L,AFG1L,GPAM,DMD,HSPD1,DNM1L,CPT2,ACAD9,AIFM1,TIMM44,NDUFV1,MRPS9,UQCRC2,BPHL,MRPL15,MRPS5,REEP1,MPC2,SLC25A15,MRPL22,TRAK1,COX10,NDUFS2,FECH,UQCRQ,COQ6,COX5B,…
GO:CC	actin cytoskeleton	6.13127	517	819	54	18964	ACTG2,TRPV4,SRCIN1,MYH7,MYLK3,TNNC2,MYL3,SORBS1,ACTC1,CORIN,NEBL,MYL4,LDB3,EFR3B,ABLIM1,MYL9,AFAP1L1,LMOD1,MYO18B,TMOD1,XIRP1,ACTN2,SVIL,CFL2,PAWR,ABLIM3,RHOQ,SHROOM3,TNNC1,PEAK1,SYNPO2L,MYL6,SLC2A1,TNNT2,PDLIM5,SMTN,CNR1,NEXN,MYOZ1,HSPB7,TNNI1,PARVA,MYO1D,SMTNL2,DYNLL2,CLIC5,DMD,MSRB1,TMOD2,ACTA1,FHOD3,PRKCB,TPM4,DNAJA3
GO:CC	mitochondrial envelope	5.96312	800	819	72	18964	CKMT2,PLN,AIFM3,MAOA,GRAMD4,PRKN,NRP1,SLC25A34,PPIF,NAT8L,SLC25A4,FBXL4,CRAT,MGARP,SLC25A12,RTN4IP1,IMMT,PLEKHN1,CYCS,SDHA,MFN1,NNT,CNR1,BCL2L13,AKAP1,GOT2,LPIN1,MRPS22,TRAP1,ATP5MC1,SDHB,ACADL,NDUFS1,FAM162A,ETFDH,COQ10A,UQCRC1,PMPCA,NDUFS3,MPC1L,AFG1L,GPAM,DMD,HSPD1,DNM1L,CPT2,ACAD9,AIFM1,TIMM44,NDUFV1,MRPS9,UQCRC2,BPHL,MRPL15,MRPS5,REEP1,MPC2,SLC25A15,PRELID3A,MRPL22,TRAK1,COX10,NDUFS2,FECH,UQ…
GO:CC	supramolecular complex	5.27748	1325	819	101	18964	BMP10,ACTG2,KLHL40,NRAP,MTUS1,SCN5A,TRPV4,CACNA1S,MYH7,TNNC2,FBXL22,MYL3,DYRK3,MYBPC3,CACNA1C,NRP1,ACTC1,PPP1R12B,FHL2,BFSP2,NEBL,MYL4,SLC8A1,LDB3,PKP2,LRRC39,MYL9,RASSF3,ARHGAP18,KIF21A,LMOD1,MYO18B,SHTN1,TMOD1,SMPX,KRT13,PRKAA2,ACTN2,SVIL,CFL2,PAWR,MCRIP2,RHOQ,SHROOM3,TNNC1,MYBPHL,SYNPO2L,FBP2,TRIM55,ELN,SLC2A1,MCC,C10ORF71,ITGB1BP2,SOCS1,ANK3,MYOM1,TNNT2,PDLIM5,SMTN,NEXN,MYOZ1,RYR2,LARP4B,TNNI…
GO:CC	striated muscle thin filament	5.23536	23	819	10	18964	TNNC2,LMOD1,TMOD1,TNNC1,TNNT2,TNNI1,TMOD2,ACTA1,FHOD3,TPM4
GO:CC	synapse	4.89946	1348	819	101	18964	DGKI,LRFN5,CAMK2A,ADCYAP1,LYPD1,ABCC8,KCNJ3,CDH13,ERBB4,TMEM163,SRCIN1,SYNDIG1,RGS10,IL1RAPL2,RAB26,PAK5,PTPRO,SERPINE2,CACNA1C,CACNG4,PRKN,NRP1,PPM1H,NTSR1,CAP2,SLC8A1,PTPRT,P2RX5,SLC16A3,SLC18A2,NOS1,ZDHHC2,MCTP1,SNCB,ADGRL2,GOT1,FRRS1L,GLUL,HOMER2,ACTN2,EEF2K,SDK1,SYT12,GAP43,KIRREL3,ABLIM3,CPLX3,EGFLAM,SLC6A17,SSPN,KCTD12,CHRM2,FZD4,SLC2A1,CACNB2,SORCS3,CPEB4,ANK3,UNC119,CNTNAP1,PDLIM5,CNR1,E…
GO:CC	intercalated disc	4.74235	54	819	14	18964	CTNNA3,NRAP,KCNJ11,SCN5A,GJA5,SLC8A1,PKP2,CXADR,DSG2,SLC2A1,ANK3,OBSL1,AKAP6,DES
GO:CC	integral component of plasma membrane	4.55284	1643	819	116	18964	KCNH7,EDNRB,LRFN5,TRPC5,FSHR,GJA8,SLC24A2,KCNJ11,ABCC8,NRXN3,KCNJ3,SCN5A,TRPV4,SEMA3C,ERBB4,KCNG1,SLC2A5,AGTR1,GPR88,SEMA3B,CD164,SYNDIG1,ENTPD1,PTGER2,NINJ2,TACR1,STOM,LPAR4,GJA5,SSTR2,PTPRO,KCNG2,BMPR1B,CACNA1C,KCNH6,CACNG4,ITGA7,NRP1,ADCY3,SLC16A7,EPHA5,NPR3,SLC38A3,CORIN,NTSR1,PLPPR1,SLC8A1,PTPRT,P2RX5,CXADR,SLC16A3,SLC18A2,ZDHHC2,SLC16A6,SLC25A4,TRHDE,ADGRL2,TNFRSF4,ERBB3,KIRREL3,OPN1LW,SLC6…
GO:CC	A band	4.54987	40	819	12	18964	KLHL40,MYL3,MYBPC3,PPP1R12B,FHL2,MYL4,LRRC39,SMPX,MYOM1,OBSL1,SMTNL2,PPP2R5A
GO:CC	cell periphery	4.44912	6178	819	337	18964	KCNH7,NTN1,DGKI,NPPA,EDNRB,LRRC3B,ACTG2,GPR83,LRFN5,TRPC5,GREM1,RASGRF1,FSHR,GJA8,CACNA2D3,PTGDR,LYPD1,SLC24A2,PFKM,KCNJ11,MTUS1,ABCC8,NRXN3,KCNJ3,ADAMTS20,CDH13,SCN5A,TRPV4,SEMA3C,NRN1L,ERBB4,CFC1,KCNG1,SLC2A5,CACNA1S,SMOC1,AGTR1,ALPK2,ZDHHC22,GPR88,SEMA3B,CD164,CRIP2,CA9,SYNDIG1,ENTPD1,PTGER2,RGS10,IL1RAPL2,NINJ2,TACR1,CCDC141,STOM,LPAR4,GJA5,EPCAM,RAB26,SSTR2,PTPRO,GRK5,SPON2,SERPINE2,POPDC2,S…
GO:CC	intrinsic component of plasma membrane	4.44251	1725	819	120	18964	KCNH7,EDNRB,LRFN5,TRPC5,FSHR,GJA8,SLC24A2,KCNJ11,ABCC8,NRXN3,KCNJ3,SCN5A,TRPV4,SEMA3C,NRN1L,ERBB4,KCNG1,SLC2A5,AGTR1,GPR88,SEMA3B,CD164,SYNDIG1,ENTPD1,PTGER2,NINJ2,TACR1,STOM,LPAR4,GJA5,RAB26,SSTR2,PTPRO,KCNG2,BMPR1B,CACNA1C,KCNH6,CACNG4,ITGA7,NRP1,ADCY3,SLC16A7,EPHA5,NPR3,SLC38A3,CORIN,NTSR1,PLPPR1,SLC8A1,PTPRT,P2RX5,CXADR,SLC16A3,SLC18A2,ZDHHC2,SLC16A6,SLC25A4,TRHDE,ADGRL2,TNFRSF4,ERBB3,KIRREL3…
GO:CC	membrane	3.68144	9829	819	493	18964	KCNH7,DGKI,WSCD2,EDNRB,LRRC3B,GPR83,LRFN5,TRPC5,VEGFD,ZNF106,CWH43,CKMT2,CAMK2A,RASGRF1,FSHR,GJA8,CACNA2D3,PLN,MAMDC2,PTGDR,LYPD1,HHATL,AIFM3,SLC24A2,PFKM,G6PC1,KCNJ11,MTUS1,ABCC8,NRXN3,KCNJ3,PLEKHA7,CDH13,PYGB,SCN5A,TRPV4,SEMA3C,ACMSD,NRN1L,ERBB4,CFC1,KCNG1,TMEM163,SLC2A5,CACNA1S,RPL3L,AGTR1,ALPK2,IRF4,ZDHHC22,MYLK4,GPR88,SEMA3B,CD164,CA9,SYNDIG1,ENTPD1,PTGER2,RGS10,IL1RAPL2,NINJ2,TACR1,MAOA,CYP…
GO:CC	organelle inner membrane	3.67439	564	819	51	18964	CKMT2,AIFM3,PTGS2,SLC25A34,PPIF,P2RX5,SLC25A4,CRAT,SLC25A12,IMMT,CYCS,SDHA,NNT,TMEM120A,GOT2,MRPS22,TRAP1,ATP5MC1,SDHB,NDUFS1,ETFDH,COQ10A,UQCRC1,PMPCA,NDUFS3,MPC1L,DMD,HSPD1,CPT2,ACAD9,AIFM1,TIMM44,NDUFV1,MRPS9,UQCRC2,MRPL15,MRPS5,LRPPRC,MPC2,SLC25A15,MRPL22,COX10,NDUFS2,FECH,UQCRQ,COQ6,COX5B,GHITM,MRPS27,COQ9,MICOS13
GO:CC	mitochondrial inner membrane	3.65331	502	819	47	18964	CKMT2,AIFM3,SLC25A34,PPIF,SLC25A4,CRAT,SLC25A12,IMMT,CYCS,SDHA,NNT,GOT2,MRPS22,TRAP1,ATP5MC1,SDHB,NDUFS1,ETFDH,COQ10A,UQCRC1,PMPCA,NDUFS3,MPC1L,DMD,HSPD1,CPT2,ACAD9,AIFM1,TIMM44,NDUFV1,MRPS9,UQCRC2,MRPL15,MRPS5,MPC2,SLC25A15,MRPL22,COX10,NDUFS2,FECH,UQCRQ,COQ6,COX5B,GHITM,MRPS27,COQ9,MICOS13
GO:CC	cell-cell contact zone	3.54236	76	819	15	18964	CTNNA3,NRAP,KCNJ11,SCN5A,GJA5,SLC8A1,PKP2,CXADR,DSG2,SLC2A1,ANK3,TJP2,OBSL1,AKAP6,DES
GO:CC	neuron to neuron synapse	3.50521	371	819	38	18964	DGKI,LRFN5,CAMK2A,ERBB4,SRCIN1,SYNDIG1,PTPRO,CACNA1C,CACNG4,PRKN,NTSR1,CAP2,SLC8A1,PTPRT,SLC16A3,NOS1,ZDHHC2,HOMER2,ACTN2,EEF2K,SYT12,GAP43,CHRM2,SORCS3,CPEB4,PDLIM5,EPS8,CACNG3,DYNLL2,DMD,TANC1,MTMR2,ADORA1,BAALC,DAGLA,ZDHHC15,CACNG5,SLC1A1
GO:CC	organelle envelope	3.45402	1244	819	90	18964	EDNRB,CKMT2,PLN,AIFM3,KCNJ11,MAOA,GRK5,GRAMD4,PTGS2,RAP1GAP2,PRKN,NRP1,SLC25A34,NUP210,PPIF,P2RX5,SLC16A3,NAT8L,SLC25A4,OSBPL3,FBXL4,CRAT,MGARP,SLC25A12,RTN4IP1,IMMT,PLEKHN1,OSBPL6,KLHDC2,CLGN,NUP42,CYCS,SDHA,MFN1,NNT,TMEM120A,CNR1,BCL2L13,AKAP1,GOT2,LPIN1,MRPS22,TRAP1,ATP5MC1,SDHB,ACADL,NDUFS1,FAM162A,ETFDH,AKAP6,COQ10A,UQCRC1,PMPCA,NDUFS3,MPC1L,AFG1L,GPAM,DMD,HSPD1,DNM1L,CPT2,ACAD9,AIFM1,TIMM44…
GO:CC	envelope	3.45402	1244	819	90	18964	EDNRB,CKMT2,PLN,AIFM3,KCNJ11,MAOA,GRK5,GRAMD4,PTGS2,RAP1GAP2,PRKN,NRP1,SLC25A34,NUP210,PPIF,P2RX5,SLC16A3,NAT8L,SLC25A4,OSBPL3,FBXL4,CRAT,MGARP,SLC25A12,RTN4IP1,IMMT,PLEKHN1,OSBPL6,KLHDC2,CLGN,NUP42,CYCS,SDHA,MFN1,NNT,TMEM120A,CNR1,BCL2L13,AKAP1,GOT2,LPIN1,MRPS22,TRAP1,ATP5MC1,SDHB,ACADL,NDUFS1,FAM162A,ETFDH,AKAP6,COQ10A,UQCRC1,PMPCA,NDUFS3,MPC1L,AFG1L,GPAM,DMD,HSPD1,DNM1L,CPT2,ACAD9,AIFM1,TIMM44…
REAC	Muscle contraction	14.7658	195	516	44	10622	NPPC,NPPA,ACTG2,CAMK2A,NKX2-5,FGF14,PLN,MYL10,KCNJ11,SCN5A,TNNC2,MYL3,MYBPC3,CACNA1C,CACNG4,SORBS1,ACTC1,CORIN,MYL4,SLC8A1,NOS1,MYL9,LMOD1,TMOD1,ACTN2,TNNC1,FXYD2,MYL6,CACNB2,TNNT2,TBX5,RYR2,TNNI1,DMD,GUCY1A1,ATP2A2,TMOD2,ACTA1,FKBP1B,CAMK2D,DES,CASQ2,TPM4,CAMK2G
REAC	The citric acid (TCA) cycle and respiratory electron transport	9.61271	175	516	35	10622	PDHA2,SLC16A3,LDHA,CS,IDH3A,PDK1,DLAT,ACO2,CYCS,SDHA,NNT,PDHX,TRAP1,ATP5MC1,SUCLA2,SDHB,NDUFS1,ETFDH,COQ10A,UQCRC1,LDHB,MDH2,ETFA,NDUFS3,ACAD9,NDUFV1,UQCRC2,DLST,LRPPRC,IDH2,SUCLG1,MPC2,NDUFS2,UQCRQ,COX5B
REAC	Metabolism	9.60272	2077	516	168	10622	CKMT2,GADL1,PFKM,G6PC1,KCNJ11,ABCC8,PYGB,ALDH1L2,ACMSD,RPL3L,DMGDH,CA9,ENTPD1,MAOA,CYP3A4,KCNG2,AMPD3,CHST15,CACNA1C,PLA1A,PTGS2,UPP1,ACADSB,B3GAT2,NUP210,ADCY3,MBTPS2,INPP4B,FHL2,PDHA2,HACD1,SLC16A3,ENTPD2,HPGD,NAT8L,VCAN,CA6,FABP1,GOT1,MGLL,MOCOS,PPP1R3C,GLUL,OSBPL3,PRKAA2,TECRL,CYP4V2,CRAT,PHYH,SLC25A12,HNMT,GCLC,ACAA2,LDHA,PITPNM3,CS,ADCY7,PCCA,OSBPL6,NMRK2,PRKAG2,IDH3A,PHKA2,PDK1,FBP2,HS6ST3…
REAC	Pyruvate metabolism and Citric Acid (TCA) cycle	8.8253	54	516	19	10622	PDHA2,SLC16A3,LDHA,CS,IDH3A,PDK1,DLAT,ACO2,SDHA,NNT,PDHX,SUCLA2,SDHB,LDHB,MDH2,DLST,IDH2,SUCLG1,MPC2
REAC	Striated Muscle Contraction	7.75625	36	516	15	10622	TNNC2,MYL3,MYBPC3,ACTC1,MYL4,TMOD1,ACTN2,TNNC1,TNNT2,TNNI1,DMD,TMOD2,ACTA1,DES,TPM4
REAC	Gluconeogenesis	6.27045	32	516	13	10622	G6PC1,GOT1,SLC25A12,FBP2,ALDOC,SLC37A1,GOT2,PGAM1,MDH2,MDH1,PGK2,GPI,GAPDH
REAC	Citric acid cycle (TCA cycle)	6.15889	22	516	11	10622	CS,IDH3A,ACO2,SDHA,NNT,SUCLA2,SDHB,MDH2,DLST,IDH2,SUCLG1
REAC	Glucose metabolism	5.07242	85	516	19	10622	PFKM,G6PC1,NUP210,GOT1,SLC25A12,FBP2,ALDOC,NUP42,SLC37A1,PGP,GOT2,PGAM1,MDH2,PFKL,PFKP,MDH1,PGK2,GPI,GAPDH
REAC	Cardiac conduction	4.07097	127	516	22	10622	NPPC,NPPA,CAMK2A,NKX2-5,FGF14,PLN,KCNJ11,SCN5A,CACNA1C,CACNG4,CORIN,SLC8A1,NOS1,FXYD2,CACNB2,TBX5,RYR2,ATP2A2,FKBP1B,CAMK2D,CASQ2,CAMK2G
REAC	Respiratory electron transport	2.49169	101	516	17	10622	CYCS,SDHA,TRAP1,SDHB,NDUFS1,ETFDH,COQ10A,UQCRC1,ETFA,NDUFS3,ACAD9,NDUFV1,UQCRC2,LRPPRC,NDUFS2,UQCRQ,COX5B
REAC	Ion homeostasis	2.39596	54	516	12	10622	CAMK2A,PLN,KCNJ11,SLC8A1,NOS1,FXYD2,RYR2,ATP2A2,FKBP1B,CAMK2D,CASQ2,CAMK2G
REAC	Neuronal System	1.91358	400	516	39	10622	KCNH7,CAMK2A,RASGRF1,CACNA2D3,KCNJ11,ABCC8,NRXN3,KCNJ3,KCNG1,IL1RAPL2,MAOA,KCNG2,KCNH6,CACNG4,ADCY3,SLC18A2,GLUL,HOMER2,PRKAA2,ACTN2,SYT12,GJD2,ADCY7,PRKAG2,ADCY6,CACNB2,PDLIM5,ABAT,CACNG3,ALDH5A1,SYT2,LRTOMT,CAMK2D,PRKCB,SLC38A1,CAMK2G,SLC1A1,RPS6KA2,KCNN2
REAC	Respiratory electron transport, ATP synthesis by chemiosmotic coupling, and heat production by uncoupling proteins.	1.7968	125	516	18	10622	CYCS,SDHA,TRAP1,ATP5MC1,SDHB,NDUFS1,ETFDH,COQ10A,UQCRC1,ETFA,NDUFS3,ACAD9,NDUFV1,UQCRC2,LRPPRC,NDUFS2,UQCRQ,COX5B
REAC	Ion transport by P-type ATPases	1.56404	55	516	11	10622	CAMK2A,PLN,FXYD2,ATP11A,ATP10A,ATP9A,ATP10D,ATP8A1,ATP2A2,CAMK2D,CAMK2G
REAC	Pyruvate metabolism	1.4778	30	516	8	10622	PDHA2,SLC16A3,LDHA,PDK1,DLAT,PDHX,LDHB,MPC2
REAC	Aspartate and asparagine metabolism	1.31856	11	516	5	10622	GADL1,NAT8L,GOT1,SLC25A12,GOT2

## Sheet: SAN ENRICHICHED gProfiler
source	term_name	negative_log10_of_adjusted_p_value	term_size	query_size	intersection_size	effective_domain_size	intersections
GO:MF	extracellular matrix structural constituent	15.8002	173	1257	50	18679	LUM,ASPN,OGN,VWF,ADIPOQ,FGG,MMRN1,EDIL3,TNC,SBSPON,OPTC,FBLN5,MATN2,TGFBI,THBS2,COL14A1,TFPI2,COL8A1,CILP,MGP,HAPLN1,VWA1,FBN2,FGB,COL9A3,MFAP2,COL9A1,COL6A1,COL9A2,LAMB4,VTN,DPT,COL5A1,COL12A1,CTHRC1,LAMA4,COL6A2,FGL2,FBN3,DCN,COL5A2,COL1A2,COL6A3,SRPX2,FBLN2,COL1A1,FBN1,IMPG2,COL13A1,PRELP
GO:MF	gated channel activity	13.76	343	1257	70	18679	KCNMB1,CHRNA4,GRIK2,TMC3,TRPA1,ASIC2,NCS1,CHRNB4,GABRA3,GABRA5,GABRA1,CACNA1D,KCNF1,KCNMA1,PEX5L,KCNV1,KCNJ8,ANO6,HCN4,GRIA3,KCNMB4,KCNE4,CACNA1G,PTK2B,KCNG4,KCNB2,KCNC2,TRPM3,GABRB2,GRID1,GRIK1,CHRNA9,TRPM2,GABRB3,KCNQ3,KCNS1,KCNQ5,SNAP25,ASIC1,CACNA1B,CHRNB2,CYBB,HCN1,KCNK5,GRIA1,TMEM37,TRPV1,KCNA2,SCN9A,SCN11A,CHRNA7,NALCN,KCNAB1,CACNA1E,KCNB1,P2RX3,KCNA3,CACNA1H,CLCN2,GRIK4,GRIN3B,CLIC2,GLRB,…
GO:MF	passive transmembrane transporter activity	13.0322	483	1257	85	18679	AQP5,KCNMB1,CHRNA4,TRPC4,GRIK2,TMC3,TRPA1,ASIC2,NCS1,CHRNB4,GABRA3,GABRA5,GABRA1,CACNA1D,KCNF1,KCNMA1,PEX5L,KCNV1,KCNJ8,ANO6,HCN4,GRIA3,KCNMB4,KCNE4,CACNA1G,PTK2B,KCNG4,KCNB2,KCNC2,TRPM3,GABRB2,TRPC6,GRID1,GRIK1,CHRNA9,TRPM2,GABRB3,KCNQ3,KCNS1,KCNQ5,SNAP25,ASIC1,UNC80,GJB6,CACNA1B,CHRNB2,CYBB,HCN1,KCNK5,GRIA1,ANO3,TMEM37,TRPV1,KCNA2,SCN9A,SCN11A,CHRNA7,NALCN,KCNAB1,CACNA1E,KCNB1,AQP4,P2RX3,KCNA3,…
GO:MF	channel activity	13.0322	483	1257	85	18679	AQP5,KCNMB1,CHRNA4,TRPC4,GRIK2,TMC3,TRPA1,ASIC2,NCS1,CHRNB4,GABRA3,GABRA5,GABRA1,CACNA1D,KCNF1,KCNMA1,PEX5L,KCNV1,KCNJ8,ANO6,HCN4,GRIA3,KCNMB4,KCNE4,CACNA1G,PTK2B,KCNG4,KCNB2,KCNC2,TRPM3,GABRB2,TRPC6,GRID1,GRIK1,CHRNA9,TRPM2,GABRB3,KCNQ3,KCNS1,KCNQ5,SNAP25,ASIC1,UNC80,GJB6,CACNA1B,CHRNB2,CYBB,HCN1,KCNK5,GRIA1,ANO3,TMEM37,TRPV1,KCNA2,SCN9A,SCN11A,CHRNA7,NALCN,KCNAB1,CACNA1E,KCNB1,AQP4,P2RX3,KCNA3,…
GO:MF	ion channel activity	12.2911	434	1257	78	18679	KCNMB1,CHRNA4,TRPC4,GRIK2,TMC3,TRPA1,ASIC2,NCS1,CHRNB4,GABRA3,GABRA5,GABRA1,CACNA1D,KCNF1,KCNMA1,PEX5L,KCNV1,KCNJ8,ANO6,HCN4,GRIA3,KCNMB4,KCNE4,CACNA1G,PTK2B,KCNG4,KCNB2,KCNC2,TRPM3,GABRB2,TRPC6,GRID1,GRIK1,CHRNA9,TRPM2,GABRB3,KCNQ3,KCNS1,KCNQ5,SNAP25,ASIC1,UNC80,CACNA1B,CHRNB2,HCN1,KCNK5,GRIA1,ANO3,TMEM37,TRPV1,KCNA2,SCN9A,SCN11A,CHRNA7,NALCN,KCNAB1,CACNA1E,KCNB1,P2RX3,KCNA3,CACNA1H,CLCN2,CALHM2…
GO:MF	cation channel activity	10.7738	338	1257	64	18679	KCNMB1,CHRNA4,TRPC4,GRIK2,TRPA1,ASIC2,NCS1,CHRNB4,CACNA1D,KCNF1,KCNMA1,PEX5L,KCNV1,KCNJ8,ANO6,HCN4,GRIA3,KCNMB4,KCNE4,CACNA1G,PTK2B,KCNG4,KCNB2,KCNC2,TRPM3,TRPC6,GRIK1,CHRNA9,TRPM2,KCNQ3,KCNS1,KCNQ5,SNAP25,ASIC1,UNC80,CACNA1B,CHRNB2,HCN1,KCNK5,GRIA1,TMEM37,TRPV1,KCNA2,SCN9A,SCN11A,CHRNA7,NALCN,KCNAB1,CACNA1E,KCNB1,P2RX3,KCNA3,CACNA1H,CALHM2,TRPV2,GRIK4,GRIN3B,SLC4A11,SLC24A3,TMEM63A,HTR1B,ASIC4,A…
GO:MF	signaling receptor activity	10.0189	1549	1257	179	18679	TSHR,SCTR,CHRNA4,ADGRB1,GRIK2,NPY1R,LRRN2,NTRK3,CHRNB4,ADGRA1,GPR37,THRB,UNC5D,PTPRN2,GABRA3,PTPRZ1,P2RY8,HTR2B,SLAMF8,GABRA5,RET,NLGN1,GABRA1,GRM8,IL20RA,CNTFR,CD3E,GPR20,SORCS1,TREM2,RAMP2,VIPR2,NTRK2,GRIA3,PKDCC,KIT,C3AR1,PTPRB,OPN5,BDKRB1,EDAR,RTN4R,PTK2B,NLGN4Y,RXFP1,BLK,ACKR4,GABRB2,UTS2R,TLR7,ROBO2,LPAR6,TLR4,GRID1,PPARG,CCR2,NPY5R,DRD3,CUBN,MPL,IL1R1,GRIK1,MARCO,CHRNA9,GPR135,CSF3R,CD48,G…
GO:MF	molecular transducer activity	10.0189	1549	1257	179	18679	TSHR,SCTR,CHRNA4,ADGRB1,GRIK2,NPY1R,LRRN2,NTRK3,CHRNB4,ADGRA1,GPR37,THRB,UNC5D,PTPRN2,GABRA3,PTPRZ1,P2RY8,HTR2B,SLAMF8,GABRA5,RET,NLGN1,GABRA1,GRM8,IL20RA,CNTFR,CD3E,GPR20,SORCS1,TREM2,RAMP2,VIPR2,NTRK2,GRIA3,PKDCC,KIT,C3AR1,PTPRB,OPN5,BDKRB1,EDAR,RTN4R,PTK2B,NLGN4Y,RXFP1,BLK,ACKR4,GABRB2,UTS2R,TLR7,ROBO2,LPAR6,TLR4,GRID1,PPARG,CCR2,NPY5R,DRD3,CUBN,MPL,IL1R1,GRIK1,MARCO,CHRNA9,GPR135,CSF3R,CD48,G…
GO:MF	transmembrane signaling receptor activity	9.14556	1331	1257	157	18679	TSHR,SCTR,CHRNA4,ADGRB1,GRIK2,NPY1R,NTRK3,CHRNB4,ADGRA1,GPR37,UNC5D,PTPRN2,GABRA3,PTPRZ1,P2RY8,HTR2B,GABRA5,RET,GABRA1,GRM8,IL20RA,CNTFR,CD3E,GPR20,SORCS1,TREM2,RAMP2,VIPR2,NTRK2,GRIA3,PKDCC,KIT,C3AR1,PTPRB,OPN5,BDKRB1,EDAR,RTN4R,PTK2B,RXFP1,BLK,ACKR4,GABRB2,UTS2R,TLR7,ROBO2,LPAR6,TLR4,GRID1,PPARG,CCR2,NPY5R,DRD3,MPL,IL1R1,GRIK1,MARCO,CHRNA9,GPR135,CSF3R,GFRA4,GABRB3,CXCR4,TNFRSF8,CSF1R,P2RY13,IL…
GO:MF	signaling receptor binding	8.26991	1551	1257	173	18679	NTS,GDF10,CXCL14,RLN3,DLL1,WNT9A,ANGPTL3,APOB,OGN,SEMA5A,VWF,ADIPOQ,FGG,TTR,MAP7,CCN3,BMP2,OSTN,CDH17,EDIL3,FST,SFRP2,KNG1,CCN5,NSG1,PTPRZ1,LRTM2,VIP,FBLN5,EGFL6,GABRA5,TF,TGFBI,NLGN1,APELA,LRRTM2,DSCAM,NMU,CNTFR,CD3E,KITLG,NPPC,CCK,SEMA3A,KCNJ8,ANGPTL1,RELN,PENK,FLRT3,CPE,CNRIP1,NECAB2,EDN2,PRLH,SEMA3G,SHANK2,RSPO2,C1QL1,COLEC10,HGF,CD9,BAMBI,RSPO3,TCIM,APOC3,WIF1,NTF3,ITPRID1,GRB14,MRAP2,PTK2B,…
GO:MF	glycosaminoglycan binding	8.01328	238	1257	47	18679	LIPC,ANGPTL3,APOB,SEMA5A,SOD3,CCN3,KNG1,CCN5,LRTM2,SERPIND1,STAB2,SULF1,THBS2,TREM2,RSPO2,RSPO3,RTN4R,HAPLN1,NELL2,EVA1C,CCDC80,CEMIP,NELL1,TENM1,BCAN,VTN,ECM2,F2,PGF,COL5A1,TNFAIP6,SLIT1,NRP2,GREM2,DCN,ADAMTS15,FGFR1,LYVE1,FGF10,FBN1,PCOLCE2,DPYSL3,IMPG2,COL13A1,LPL,FGF12,PRELP
GO:MF	inorganic molecular entity transmembrane transporter activity	7.39309	721	1257	96	18679	AQP5,SLC5A8,KCNMB1,CHRNA4,TRPC4,GRIK2,TMC3,TRPA1,ASIC2,NCS1,SLC6A4,CHRNB4,GABRA3,SLC5A9,GABRA5,GABRA1,SLC6A15,CACNA1D,KCNF1,KCNMA1,PEX5L,KCNV1,KCNJ8,SLC6A2,ANO6,HCN4,GRIA3,KCNMB4,KCNE4,SLC4A8,CACNA1G,PTK2B,KCNG4,KCNB2,KCNC2,SLC45A3,TRPM3,GABRB2,TRPC6,GRID1,SLC13A3,GRIK1,CHRNA9,TRPM2,SLC28A3,GABRB3,KCNQ3,KCNS1,KCNQ5,SNAP25,ASIC1,UNC80,CACNA1B,CHRNB2,HCN1,KCNK5,GRIA1,ANO3,TMEM37,NIPAL1,TRPV1,KCNA2,…
GO:MF	heparin binding	6.67508	168	1257	36	18679	LIPC,ANGPTL3,APOB,SOD3,CCN3,KNG1,CCN5,LRTM2,SERPIND1,THBS2,RSPO2,RSPO3,RTN4R,NELL2,EVA1C,CCDC80,NELL1,TENM1,VTN,ECM2,F2,PGF,COL5A1,SLIT1,NRP2,GREM2,ADAMTS15,FGFR1,FGF10,FBN1,PCOLCE2,IMPG2,COL13A1,LPL,FGF12,PRELP
GO:MF	calcium ion binding	6.63435	723	1257	94	18679	CALB1,ASPN,DLL1,PCDH10,MMRN1,CDH17,NCS1,EDIL3,DLK1,DNASE1L3,FBLN5,EGFL6,RET,STAB2,MATN2,LRP1B,PVALB,CDH22,SULF1,THBS2,SCIN,NECAB2,NKD1,COLEC11,SCGN,CDH23,CLSTN2,VILL,NECAB1,ENPP2,ANKEF1,PCDHAC1,MGP,S100A6,CDH20,NCALD,NELL2,PCDH8,FBN2,CUBN,ASTN2,MASP2,TRPM2,HPGDS,RASGRP3,SYT1,PCDH1,SCUBE2,SCUBE1,NELL1,GRM7,CACNA1B,P4HTM,HPCAL1,HEG1,CDH10,F2,PCDH12,SNCA,VLDLR,PPP3CA,MATN4,DNER,S100A16,TENM2,FBN3,CA…
GO:MF	ligand-gated ion channel activity	6.36732	141	1257	32	18679	CHRNA4,GRIK2,TRPA1,ASIC2,CHRNB4,GABRA3,GABRA5,GABRA1,PEX5L,KCNJ8,HCN4,GRIA3,PTK2B,GABRB2,GRID1,GRIK1,CHRNA9,TRPM2,GABRB3,ASIC1,CHRNB2,HCN1,GRIA1,TRPV1,CHRNA7,P2RX3,GRIK4,GRIN3B,GLRB,ASIC4,ABCC9,CNGA2
GO:MF	ligand-gated channel activity	6.36732	141	1257	32	18679	CHRNA4,GRIK2,TRPA1,ASIC2,CHRNB4,GABRA3,GABRA5,GABRA1,PEX5L,KCNJ8,HCN4,GRIA3,PTK2B,GABRB2,GRID1,GRIK1,CHRNA9,TRPM2,GABRB3,ASIC1,CHRNB2,HCN1,GRIA1,TRPV1,CHRNA7,P2RX3,GRIK4,GRIN3B,GLRB,ASIC4,ABCC9,CNGA2
GO:MF	metal ion transmembrane transporter activity	6.12794	429	1257	64	18679	SLC5A8,KCNMB1,TRPC4,GRIK2,TRPA1,ASIC2,NCS1,SLC6A4,SLC5A9,SLC6A15,CACNA1D,KCNF1,KCNMA1,KCNV1,KCNJ8,SLC6A2,HCN4,KCNMB4,KCNE4,SLC4A8,CACNA1G,KCNG4,KCNB2,KCNC2,TRPM3,TRPC6,SLC13A3,GRIK1,CHRNA9,TRPM2,SLC28A3,KCNQ3,KCNS1,KCNQ5,SNAP25,ASIC1,CACNA1B,HCN1,KCNK5,TMEM37,NIPAL1,TRPV1,KCNA2,SCN9A,SCN11A,CHRNA7,NALCN,KCNAB1,CACNA1E,KCNB1,KCNA3,CACNA1H,SLC11A1,TRPV2,GRIK4,GRIN3B,SLC4A11,SLC24A3,HTR1B,SLC4A10,SL…
GO:MF	ion transmembrane transporter activity	5.91004	845	1257	103	18679	SLC5A8,KCNMB1,SLCO2A1,CHRNA4,TRPC4,GRIK2,TMC3,TRPA1,ASIC2,NCS1,SLC6A4,CHRNB4,GABRA3,SLC5A9,GABRA5,GABRA1,SLC6A15,CACNA1D,KCNF1,KCNMA1,PEX5L,KCNV1,KCNJ8,SLC6A2,ANO6,HCN4,SLC18A3,GRIA3,KCNMB4,KCNE4,SLC4A8,S100A6,CACNA1G,PTK2B,KCNG4,KCNB2,KCNC2,SLC45A3,TRPM3,GABRB2,TRPC6,GRID1,SLC13A3,GRIK1,CHRNA9,TRPM2,SLC28A3,GABRB3,KCNQ3,KCNS1,KCNQ5,CD36,SNAP25,ASIC1,UNC80,CACNA1B,CHRNB2,CYBB,HCN1,SLC7A2,KCNK5,GR…
GO:MF	transmitter-gated ion channel activity	5.45694	60	1257	19	18679	CHRNA4,GRIK2,CHRNB4,GABRA3,GABRA5,GABRA1,GRIA3,PTK2B,GABRB2,GRID1,GRIK1,CHRNA9,GABRB3,CHRNB2,GRIA1,CHRNA7,GRIK4,GRIN3B,GLRB
GO:MF	transmitter-gated channel activity	5.45694	60	1257	19	18679	CHRNA4,GRIK2,CHRNB4,GABRA3,GABRA5,GABRA1,GRIA3,PTK2B,GABRB2,GRID1,GRIK1,CHRNA9,GABRB3,CHRNB2,GRIA1,CHRNA7,GRIK4,GRIN3B,GLRB
GO:MF	extracellular ligand-gated ion channel activity	5.4041	73	1257	21	18679	CHRNA4,GRIK2,CHRNB4,GABRA3,GABRA5,GABRA1,GRIA3,PTK2B,GABRB2,GRID1,GRIK1,CHRNA9,GABRB3,CHRNB2,GRIA1,TRPV1,CHRNA7,P2RX3,GRIK4,GRIN3B,GLRB
GO:MF	transporter activity	5.3651	1186	1257	131	18679	AQP5,SLC5A8,KCNMB1,APOB,SLCO2A1,CHRNA4,TRPC4,FABP5,GRIK2,TMC3,TRPA1,ASIC2,CDH17,NCS1,SLC6A4,CHRNB4,GABRA3,SLC5A9,GABRA5,GABRA1,SLC6A15,CACNA1D,KCNF1,KCNMA1,PEX5L,KCNV1,KCNJ8,SLC6A2,ANO6,ATP8A2,HCN4,SLC18A3,GRIA3,KCNMB4,MFSD4A,KCNE4,SLC4A8,S100A6,CACNA1G,PTK2B,KCNG4,KCNB2,KCNC2,SLC45A3,TRPM3,GABRB2,TRPC6,GRID1,SLC13A3,CPLX1,GRIK1,CHRNA9,TRPM2,SLC28A3,GABRB3,KCNQ3,KCNS1,SLC22A31,KCNQ5,CD36,SNAP25,A…
GO:MF	inorganic cation transmembrane transporter activity	5.25515	596	1257	78	18679	SLC5A8,KCNMB1,CHRNA4,TRPC4,GRIK2,TRPA1,ASIC2,NCS1,SLC6A4,CHRNB4,SLC5A9,SLC6A15,CACNA1D,KCNF1,KCNMA1,PEX5L,KCNV1,KCNJ8,SLC6A2,ANO6,HCN4,GRIA3,KCNMB4,KCNE4,SLC4A8,CACNA1G,PTK2B,KCNG4,KCNB2,KCNC2,SLC45A3,TRPM3,TRPC6,SLC13A3,GRIK1,CHRNA9,TRPM2,SLC28A3,KCNQ3,KCNS1,KCNQ5,SNAP25,ASIC1,UNC80,CACNA1B,CHRNB2,HCN1,KCNK5,GRIA1,TMEM37,NIPAL1,TRPV1,KCNA2,SCN9A,SCN11A,CHRNA7,NALCN,KCNAB1,CACNA1E,KCNB1,P2RX3,KCN…
GO:MF	growth factor binding	5.14703	141	1257	30	18679	CCN3,NTRK3,CCN5,NTRK2,IL1R1,ITGB3,IL2RG,CD36,COL6A1,NRROS,CRIM1,COL5A1,PDGFB,WFIKKN1,FLT4,PDGFRB,NRP2,IGFBP5,EPHA7,COL1A2,FGFR1,FGFR3,SRPX2,COL1A1,KAZALD1,IL6R,PDGFRA,TSKU,NGFR,IGFBP3
GO:MF	transmembrane transporter activity	5.12538	1080	1257	121	18679	AQP5,SLC5A8,KCNMB1,SLCO2A1,CHRNA4,TRPC4,GRIK2,TMC3,TRPA1,ASIC2,CDH17,NCS1,SLC6A4,CHRNB4,GABRA3,SLC5A9,GABRA5,GABRA1,SLC6A15,CACNA1D,KCNF1,KCNMA1,PEX5L,KCNV1,KCNJ8,SLC6A2,ANO6,HCN4,SLC18A3,GRIA3,KCNMB4,MFSD4A,KCNE4,SLC4A8,S100A6,CACNA1G,PTK2B,KCNG4,KCNB2,KCNC2,SLC45A3,TRPM3,GABRB2,TRPC6,GRID1,SLC13A3,CPLX1,GRIK1,CHRNA9,TRPM2,SLC28A3,GABRB3,KCNQ3,KCNS1,SLC22A31,KCNQ5,CD36,SNAP25,ASIC1,UNC80,GJB6,CA…
GO:MF	voltage-gated ion channel activity	5.07178	200	1257	37	18679	NCS1,CACNA1D,KCNF1,KCNMA1,KCNV1,KCNJ8,ANO6,HCN4,KCNE4,CACNA1G,PTK2B,KCNG4,KCNB2,KCNC2,KCNQ3,KCNS1,KCNQ5,SNAP25,CACNA1B,CYBB,HCN1,KCNK5,TMEM37,KCNA2,SCN9A,SCN11A,NALCN,KCNAB1,CACNA1E,KCNB1,KCNA3,CACNA1H,CLCN2,GRIN3B,CLIC2,HTR1B,ABCC9
GO:MF	voltage-gated channel activity	5.01196	201	1257	37	18679	NCS1,CACNA1D,KCNF1,KCNMA1,KCNV1,KCNJ8,ANO6,HCN4,KCNE4,CACNA1G,PTK2B,KCNG4,KCNB2,KCNC2,KCNQ3,KCNS1,KCNQ5,SNAP25,CACNA1B,CYBB,HCN1,KCNK5,TMEM37,KCNA2,SCN9A,SCN11A,NALCN,KCNAB1,CACNA1E,KCNB1,KCNA3,CACNA1H,CLCN2,GRIN3B,CLIC2,HTR1B,ABCC9
GO:MF	cation transmembrane transporter activity	4.79331	643	1257	81	18679	SLC5A8,KCNMB1,CHRNA4,TRPC4,GRIK2,TRPA1,ASIC2,NCS1,SLC6A4,CHRNB4,SLC5A9,SLC6A15,CACNA1D,KCNF1,KCNMA1,PEX5L,KCNV1,KCNJ8,SLC6A2,ANO6,HCN4,SLC18A3,GRIA3,KCNMB4,KCNE4,SLC4A8,CACNA1G,PTK2B,KCNG4,KCNB2,KCNC2,SLC45A3,TRPM3,TRPC6,SLC13A3,GRIK1,CHRNA9,TRPM2,SLC28A3,KCNQ3,KCNS1,KCNQ5,SNAP25,ASIC1,UNC80,CACNA1B,CHRNB2,HCN1,SLC7A2,KCNK5,GRIA1,TMEM37,NIPAL1,SLC25A48,TRPV1,KCNA2,SCN9A,SCN11A,CHRNA7,NALCN,KCNAB1…
GO:MF	cytokine binding	4.63539	140	1257	29	18679	IL20RA,CNTFR,KIT,ACKR4,CCR2,IL1R1,CSF3R,CXCR4,ITGB3,CSF1R,IL2RG,CD36,CX3CR1,CSF2RA,ACKR2,NRROS,IL18R1,WFIKKN1,TNFRSF1B,LEPR,NRP2,GREM2,SOSTDC1,CCR7,IL6R,CHRD,IL22RA1,TSKU,IL31RA
GO:MF	ligand-gated cation channel activity	4.45785	111	1257	25	18679	CHRNA4,GRIK2,TRPA1,ASIC2,CHRNB4,PEX5L,KCNJ8,HCN4,GRIA3,PTK2B,GRIK1,CHRNA9,TRPM2,ASIC1,CHRNB2,HCN1,GRIA1,TRPV1,CHRNA7,P2RX3,GRIK4,GRIN3B,ASIC4,ABCC9,CNGA2
GO:CC	plasma membrane	36.7484	5680	1255	591	18964	TSHR,AQP5,SCTR,TRABD2A,SLC5A8,KCNMB1,CNTN5,DLL1,ABRA,PRKAR2B,FAM107A,APOB,CNTN2,SLCO2A1,PCDH10,SEMA5A,FGG,CHRNA4,SYPL1,TRPC4,FABP5,ADGRB1,CSMD3,MAP7,GRIK2,BMP2,PSD2,TMC3,TRPA1,NPY1R,SNTG1,ASIC2,CDH17,SMAGP,NCS1,SLC6A4,GSG1L,NTRK3,CHRNB4,AMER3,ADGRA1,GPR37,UNC5D,KNG1,PTPRN2,GABRA3,GP9,ECEL1,UPK1B,SLC5A9,APCDD1L,NSG1,PTPRZ1,P2RY8,NTM,CAVIN4,HTR2B,GABRA5,TF,HAS2,LRRC4C,RET,PSTPIP2,STAB2,TGFBI,NLGN1,…
GO:CC	extracellular matrix	34.5346	562	1255	130	18964	LUM,COL20A1,ASPN,GDF10,ANGPTL3,OGN,VWF,ADIPOQ,FGG,MMRN1,ADAMTS18,SOD3,CCN3,LRRN2,TIMP4,EDIL3,ITIH2,TNC,SPP2,SBSPON,SFRP2,LRRN3,KNG1,CCN5,PTPRZ1,OPTC,FBLN5,EGFL6,MATN2,TGFBI,SERPINF1,PTX3,SERPINF2,SULF1,THBS2,C1QC,COL14A1,ANGPTL1,RELN,TFPI2,ADAM19,COL26A1,FLRT3,COL8A1,ELFN1,F13A1,CILP,ADAMTSL2,C1QA,APOC3,P3H2,MGP,S100A6,USH2A,HAPLN1,WNT4,VWA1,FBN2,ANGPTL4,ADAMTS9,EMID1,FGB,CCDC80,TNR,COL9A3,CTSS,F…
GO:CC	external encapsulating structure	34.4477	563	1255	130	18964	LUM,COL20A1,ASPN,GDF10,ANGPTL3,OGN,VWF,ADIPOQ,FGG,MMRN1,ADAMTS18,SOD3,CCN3,LRRN2,TIMP4,EDIL3,ITIH2,TNC,SPP2,SBSPON,SFRP2,LRRN3,KNG1,CCN5,PTPRZ1,OPTC,FBLN5,EGFL6,MATN2,TGFBI,SERPINF1,PTX3,SERPINF2,SULF1,THBS2,C1QC,COL14A1,ANGPTL1,RELN,TFPI2,ADAM19,COL26A1,FLRT3,COL8A1,ELFN1,F13A1,CILP,ADAMTSL2,C1QA,APOC3,P3H2,MGP,S100A6,USH2A,HAPLN1,WNT4,VWA1,FBN2,ANGPTL4,ADAMTS9,EMID1,FGB,CCDC80,TNR,COL9A3,CTSS,F…
GO:CC	intrinsic component of plasma membrane	34.02	1725	1255	256	18964	TSHR,AQP5,TRABD2A,KCNMB1,CNTN5,DLL1,CNTN2,SLCO2A1,PCDH10,CHRNA4,SYPL1,TRPC4,ADGRB1,GRIK2,BMP2,TMC3,TRPA1,NPY1R,ASIC2,SLC6A4,GSG1L,NTRK3,CHRNB4,GPR37,PTPRN2,GABRA3,GP9,ECEL1,UPK1B,PTPRZ1,P2RY8,HTR2B,GABRA5,HAS2,LRRC4C,RET,STAB2,NLGN1,GABRA1,CA4,SLC6A15,LRRTM2,DSCAM,ADCY8,GRM8,KCNF1,CLDN1,CNTFR,CD3E,KCNMA1,SEMA3A,KCNV1,KCNJ8,GPR20,SLC6A2,FLRT3,TREM2,PHEX,HCN4,SEMA3G,RAMP2,VIPR2,DCLK1,SHANK2,NTRK2,G…
GO:CC	integral component of plasma membrane	32.6432	1643	1255	245	18964	TSHR,AQP5,TRABD2A,KCNMB1,DLL1,SLCO2A1,PCDH10,CHRNA4,SYPL1,TRPC4,ADGRB1,GRIK2,BMP2,TMC3,TRPA1,NPY1R,ASIC2,SLC6A4,GSG1L,NTRK3,CHRNB4,GPR37,PTPRN2,GABRA3,GP9,ECEL1,UPK1B,PTPRZ1,P2RY8,HTR2B,GABRA5,HAS2,LRRC4C,RET,STAB2,NLGN1,GABRA1,SLC6A15,LRRTM2,DSCAM,ADCY8,GRM8,KCNF1,CLDN1,CNTFR,CD3E,KCNMA1,SEMA3A,KCNV1,KCNJ8,GPR20,SLC6A2,FLRT3,TREM2,PHEX,HCN4,SEMA3G,RAMP2,VIPR2,DCLK1,SHANK2,NTRK2,GRIA3,NCF4,KCNMB4…
GO:CC	collagen-containing extracellular matrix	31.0511	421	1255	106	18964	LUM,COL20A1,ASPN,GDF10,ANGPTL3,OGN,VWF,ADIPOQ,FGG,MMRN1,SOD3,CCN3,EDIL3,ITIH2,TNC,SPP2,SBSPON,SFRP2,KNG1,PTPRZ1,FBLN5,EGFL6,MATN2,TGFBI,SERPINF1,SERPINF2,SULF1,THBS2,C1QC,COL14A1,ANGPTL1,ADAM19,COL26A1,COL8A1,F13A1,CILP,C1QA,APOC3,P3H2,MGP,S100A6,USH2A,HAPLN1,VWA1,FBN2,ANGPTL4,ADAMTS9,FGB,CCDC80,TNR,COL9A3,CTSS,FREM1,TINAG,MFAP2,COL9A1,CBLN1,ACHE,COL6A1,COL9A2,LAMB4,VTN,F2,VWC2,DPT,COL5A1,ADAMTS2…
GO:CC	synapse	21.1898	1348	1255	190	18964	NTS,CALB1,KCNMB1,CNTN5,PRKAR2B,FAM107A,CNTN2,CBLN2,CHRNA4,SYPL1,FABP5,ADGRB1,GRIK2,PSD2,ASIC2,NCS1,SLC6A4,GSG1L,NTRK3,CHRNB4,ADGRA1,NEFL,PTPRN2,GABRA3,NSG1,PTPRZ1,TMEM108,HTR2B,GABRA5,LRRC4C,NLGN1,GABRA1,LRRTM2,DSCAM,C1QB,CAMKV,ADCY8,NMU,CD3E,KCNMA1,CCK,C1QC,PENK,SLC6A2,FLRT3,ELFN1,PPFIA2,DCLK1,SLC18A3,SHANK2,NTRK2,GRIA3,SCGN,C1QL1,KCNMB4,NRGN,C1QA,CLSTN2,SLC4A8,NTF3,RTN4R,CACNA1G,LAMP5,PTK2B,NLG…
GO:CC	neuron projection	21.0147	1384	1255	193	18964	NTS,CALB1,PRKAR2B,FAM107A,CNTN2,CHRNA4,ADGRB1,BRINP3,MAP7,CCN3,GRIK2,PSD2,ASIC2,NEFM,NCS1,SLC6A4,NTRK3,CHRNB4,NEFL,PTPRN2,GABRA3,NSG1,VIP,TMEM108,HTR2B,STMN4,GABRA5,RET,NLGN1,GABRA1,SERPINF1,CLDN5,DSCAM,ADCY8,NMU,PVALB,CD3E,CCK,SEMA3A,BRINP1,RELN,PENK,SLC6A2,NCAM2,FLRT3,ELFN1,NECAB2,ATP8A2,DCX,PPFIA2,SLC18A3,SHANK2,NTRK2,GRIA3,SCGN,C1QL1,CDH23,NRGN,CLSTN2,GNB3,BDKRB1,SLC4A8,NTF3,RTN4R,CACNA1G,LAM…
GO:CC	cell junction	18.3956	2107	1255	251	18964	NTS,CALB1,KCNMB1,CNTN5,DLL1,PRKAR2B,FAM107A,CNTN2,CBLN2,CHRNA4,SYPL1,TRPC4,FABP5,ADGRB1,CCN3,GRIK2,PSD2,ASIC2,CDH17,SMAGP,NCS1,SLC6A4,GSG1L,TNC,NTRK3,CHRNB4,ADGRA1,NEFL,PTPRN2,GABRA3,NSG1,PTPRZ1,TMEM108,HTR2B,GABRA5,LRRC4C,NLGN1,GABRA1,LRRTM2,CLDN5,DSCAM,C1QB,CAMKV,ADCY8,NMU,CDH22,CLDN1,CD3E,KCNMA1,CCK,C1QC,PENK,SLC6A2,SCIN,FLRT3,ELFN1,PPFIA2,DCLK1,SLC18A3,SHANK2,NTRK2,DIXDC1,GRIA3,SCGN,C1QL1,KCN…
GO:CC	intrinsic component of membrane	17.7687	5873	1255	541	18964	TSHR,SLC35F3,AQP5,SCTR,TRABD2A,SLC5A8,KCNMB1,CNTN5,DLL1,CNTN2,SLCO2A1,TNMD,PCDH10,SEMA5A,SPTSSB,DMRT2,CHRNA4,SYPL1,TRPC4,SLN,ADGRB1,MOXD1,CSMD3,GRIK2,BMP2,PSD2,TMC3,TRPA1,NPY1R,LRRN2,CSMD1,ASIC2,CDH17,SMAGP,SLC6A4,GSG1L,NTRK3,CHRNB4,ADGRA1,GPR37,DLK1,UNC5D,LRRN3,PTPRN2,GABRA3,GP9,ECEL1,UPK1B,SLC5A9,APCDD1L,NSG1,PTPRZ1,P2RY8,NTM,LRTM2,TMEM108,HTR2B,SLAMF8,CHODL,GABRA5,HAS2,LRRC4C,RET,STAB2,NLGN1,G…
GO:CC	axon	16.3606	661	1255	110	18964	NTS,CALB1,CNTN2,MAP7,CCN3,GRIK2,NEFM,NCS1,NTRK3,NEFL,PTPRN2,TMEM108,STMN4,RET,SERPINF1,CLDN5,DSCAM,ADCY8,NMU,PVALB,CCK,SEMA3A,PENK,NCAM2,FLRT3,NECAB2,PPFIA2,SLC18A3,SHANK2,NTRK2,SCGN,C1QL1,NRGN,SLC4A8,NTF3,RTN4R,LAMP5,PTK2B,DSCAML1,KCNC2,USH2A,TSHZ3,TUBB3,CTNNA2,ROBO2,NFASC,MME,CA2,CPLX1,AUTS2,SYT1,BIN1,KCNQ3,VSTM2L,BOC,SNAP25,GRM7,UNC80,MAP2,EMB,CNTN4,HCN1,CYP17A1,PRSS12,GRIA1,MAPK8IP1,ZNF804A,I…
GO:CC	cell projection	16.3146	2337	1255	264	18964	NTS,CALB1,AQP5,PRKAR2B,ANGPTL3,FAM107A,CNTN2,CHRNA4,ADGRB1,BRINP3,MAP7,CCN3,GRIK2,PSD2,MYO7B,SNTG1,ASIC2,NEFM,NCS1,SLC6A4,NTRK3,CHRNB4,LRRC56,NEFL,PTPRN2,GABRA3,NSG1,VIP,TMEM108,HTR2B,STMN4,GABRA5,RET,NLGN1,GABRA1,SERPINF1,CA4,ROPN1L,CLDN5,DSCAM,ADCY8,NMU,PVALB,CD3E,KITLG,CCK,SEMA3A,BRINP1,RELN,PENK,SLC6A2,NCAM2,SCIN,FLRT3,ELFN1,NECAB2,ATP8A2,DCX,PPFIA2,SLC18A3,SHANK2,NTRK2,GRIA3,SCGN,C1QL1,CDH23…
GO:CC	integral component of membrane	16.1055	5718	1255	523	18964	TSHR,SLC35F3,AQP5,SCTR,TRABD2A,SLC5A8,KCNMB1,DLL1,SLCO2A1,TNMD,PCDH10,SEMA5A,SPTSSB,DMRT2,CHRNA4,SYPL1,TRPC4,SLN,ADGRB1,MOXD1,CSMD3,GRIK2,BMP2,PSD2,TMC3,TRPA1,NPY1R,LRRN2,CSMD1,ASIC2,CDH17,SMAGP,SLC6A4,GSG1L,NTRK3,CHRNB4,ADGRA1,GPR37,DLK1,UNC5D,LRRN3,PTPRN2,GABRA3,GP9,ECEL1,UPK1B,SLC5A9,APCDD1L,NSG1,PTPRZ1,P2RY8,LRTM2,TMEM108,HTR2B,SLAMF8,CHODL,GABRA5,HAS2,LRRC4C,RET,STAB2,NLGN1,GABRA1,CA4,LRP1B,…
GO:CC	plasma membrane bounded cell projection	15.8983	2234	1255	254	18964	NTS,CALB1,AQP5,PRKAR2B,ANGPTL3,FAM107A,CNTN2,CHRNA4,ADGRB1,BRINP3,MAP7,CCN3,GRIK2,PSD2,MYO7B,SNTG1,ASIC2,NEFM,NCS1,SLC6A4,NTRK3,CHRNB4,LRRC56,NEFL,PTPRN2,GABRA3,NSG1,VIP,TMEM108,HTR2B,STMN4,GABRA5,RET,NLGN1,GABRA1,SERPINF1,CA4,ROPN1L,CLDN5,DSCAM,ADCY8,NMU,PVALB,CD3E,KITLG,CCK,SEMA3A,BRINP1,RELN,PENK,SLC6A2,NCAM2,FLRT3,ELFN1,NECAB2,ATP8A2,DCX,PPFIA2,SLC18A3,SHANK2,NTRK2,GRIA3,SCGN,C1QL1,CDH23,NRGN…
GO:CC	cell surface	15.8149	896	1255	133	18964	TSHR,ANGPTL3,CNTN2,ADIPOQ,FGG,CHRNA4,TRPC4,BMP2,CDH17,GPR37,UNC5D,SLAMF8,TF,STAB2,NLGN1,CA4,CNTFR,CD3E,SERPINF2,SULF1,SLC6A2,ANO6,PPFIA2,RAMP2,RSPO2,KIT,CD9,CLSTN2,WIF1,RTN4R,NLGN4Y,DSCAML1,CD1B,WNT4,ACKR4,ROBO2,CD83,TLR4,FGB,MME,CCR2,ISLR2,TNR,CTSK,CUBN,MPL,IL1R1,APMAP,MXRA8,CSF3R,GFRA4,CXCR4,KCNQ3,ITGB3,SCUBE2,CSF1R,SCUBE1,HHLA2,IL2RG,HAVCR1,CD36,ASIC1,GPRC5B,TFPI,ACHE,CX3CR1,ROS1,CSF2RA,CHRNB2…
GO:CC	extracellular region	15.2721	4564	1255	435	18964	NTS,CALB1,LIPC,LUM,AQP5,COL20A1,ASPN,GDF10,PI15,CXCL14,RASSF9,RLN3,SLC5A8,CNTN5,DLL1,WNT9A,PRKAR2B,ANGPTL3,ALOX5,APOB,CBLN2,OGN,SEMA5A,VWF,ADIPOQ,FGG,MMRN1,ADAMTS18,CHRDL1,SYPL1,TTR,CCDC3,FABP5,ADGRB1,MOXD1,SOD3,BRINP3,CCN3,BMP2,OSTN,LRRN2,ISM1,TIMP4,EDIL3,ITIH2,TNC,SPP2,FST,SBSPON,PLAC8,DLK1,CRISPLD1,SFRP2,SPINK5,LRRN3,KNG1,UPK1B,SLC5A9,CCN5,PTPRZ1,OPTC,NTM,DNASE1L3,VIP,SERPIND1,ALB,FBLN5,EGFL6,…
GO:CC	somatodendritic compartment	14.5914	875	1255	128	18964	CALB1,PRKAR2B,APOB,CNTN2,CHRNA4,ADGRB1,BRINP3,CCN3,GRIK2,PSD2,ASIC2,NCS1,GABRA3,NSG1,VIP,TMEM108,HTR2B,GABRA5,RET,NLGN1,GABRA1,SERPINF1,DSCAM,ADCY8,PVALB,CD3E,CCK,PDE1A,SEMA3A,BRINP1,RELN,PENK,SLC6A2,ELFN1,NECAB2,PPFIA2,SHANK2,NTRK2,GRIA3,SCGN,NRGN,CLSTN2,GNB3,SLC4A8,NTF3,RTN4R,LAMP5,PTK2B,PCSK2,KCNB2,KCNC2,USH2A,TUBB3,PCDH8,INHA,NFASC,MME,CCR2,MPL,ASTN2,CPLX1,DRP2,TRPM2,BIN1,KLHL14,SNCAIP,SNAP25…
GO:CC	plasma membrane region	14.2894	1240	1255	162	18964	TSHR,AQP5,SLC5A8,CNTN5,DLL1,FAM107A,CNTN2,CHRNA4,TRPC4,MAP7,GRIK2,PSD2,SNTG1,CDH17,SLC6A4,GSG1L,NTRK3,CHRNB4,GABRA3,UPK1B,NSG1,CAVIN4,GABRA5,TF,HAS2,LRRC4C,NLGN1,GABRA1,CA4,LRRTM2,CLDN5,PAPPA2,ADCY8,CLDN1,CNTFR,KCNMA1,SLC6A2,FLRT3,TREM2,RAMP2,SLC18A3,SHANK2,GRIA3,NRGN,KCNE4,CD9,CLSTN2,SLC4A8,LAMP5,NLGN4Y,KCNC2,SLITRK3,USH2A,MYLK,CNTN1,GABRB2,FAIM2,PCDH8,ROBO2,GRID1,ECRG4,DRD3,CTSK,CUBN,MEGF11,SLC…
GO:CC	postsynapse	12.7124	641	1255	100	18964	CALB1,PRKAR2B,CNTN2,CHRNA4,FABP5,ADGRB1,GRIK2,PSD2,ASIC2,NCS1,SLC6A4,GSG1L,NTRK3,CHRNB4,ADGRA1,NEFL,GABRA3,NSG1,TMEM108,GABRA5,LRRC4C,NLGN1,GABRA1,LRRTM2,C1QB,ADCY8,CD3E,KCNMA1,C1QC,FLRT3,PPFIA2,DCLK1,SHANK2,NTRK2,GRIA3,NRGN,C1QA,CLSTN2,PTK2B,NLGN4Y,KCNC2,SLITRK3,CNTN1,GABRB2,FAIM2,PCDH8,GRID1,DRD3,CPLX1,GRIK1,CHRNA9,DRP2,CBLN1,GABRB3,IGSF9B,ITGB3,SNAP25,GRM7,SYNPO,CHRNB2,GRIA1,ZNF804A,CDH10,CHRM…
GO:CC	synaptic membrane	12.6802	384	1255	72	18964	CNTN5,CNTN2,CHRNA4,GRIK2,SLC6A4,GSG1L,NTRK3,CHRNB4,GABRA3,NSG1,GABRA5,LRRC4C,NLGN1,GABRA1,LRRTM2,ADCY8,KCNMA1,SLC6A2,FLRT3,SHANK2,GRIA3,NRGN,CLSTN2,SLC4A8,NLGN4Y,KCNC2,SLITRK3,CNTN1,GABRB2,FAIM2,PCDH8,GRID1,DRD3,GRIK1,CHRNA9,CBLN1,GABRB3,IGSF9B,SYT1,ITGB3,SNCAIP,SNAP25,GRM7,CHRNB2,GRIA1,CDH10,RIMS2,CHRM3,TRPV1,LRRTM4,KCNA2,CHRNA7,TENM2,KCNB1,EPHA4,NRP2,P2RX3,KCNA3,ADAM22,EPHA7,GPC4,PDLIM4,GRIK4,S…
GO:CC	dendritic tree	12.6211	643	1255	100	18964	CALB1,PRKAR2B,CHRNA4,ADGRB1,BRINP3,CCN3,GRIK2,PSD2,ASIC2,NCS1,GABRA3,NSG1,TMEM108,HTR2B,GABRA5,RET,NLGN1,GABRA1,DSCAM,ADCY8,CD3E,CCK,SEMA3A,BRINP1,RELN,PENK,ELFN1,NECAB2,PPFIA2,SHANK2,NTRK2,GRIA3,SCGN,NRGN,CLSTN2,GNB3,SLC4A8,NTF3,RTN4R,LAMP5,PTK2B,PCSK2,KCNB2,KCNC2,TUBB3,PCDH8,NFASC,MME,CCR2,CPLX1,DRP2,BIN1,GRM7,CX3CR1,MAP2,HTR2C,SYNPO,CYBB,HCN1,PRSS12,GRIA1,MAPK8IP1,ZNF804A,ADCY2,CHRM3,MAP6,TRPV…
GO:CC	dendrite	12.2716	641	1255	99	18964	CALB1,PRKAR2B,CHRNA4,ADGRB1,BRINP3,CCN3,GRIK2,PSD2,ASIC2,NCS1,GABRA3,NSG1,TMEM108,HTR2B,GABRA5,RET,NLGN1,GABRA1,DSCAM,ADCY8,CD3E,CCK,SEMA3A,BRINP1,RELN,PENK,ELFN1,NECAB2,PPFIA2,SHANK2,NTRK2,GRIA3,SCGN,NRGN,CLSTN2,GNB3,SLC4A8,NTF3,RTN4R,LAMP5,PTK2B,PCSK2,KCNB2,KCNC2,TUBB3,PCDH8,NFASC,MME,CCR2,CPLX1,DRP2,BIN1,GRM7,MAP2,HTR2C,SYNPO,CYBB,HCN1,PRSS12,GRIA1,MAPK8IP1,ZNF804A,ADCY2,CHRM3,MAP6,TRPV1,KCNA2…
GO:CC	receptor complex	12.0228	522	1255	86	18964	TSHR,CHRNA4,GRIK2,BMP2,NTRK3,CHRNB4,GPR37,PTPRN2,GABRA3,HTR2B,GABRA5,TF,RET,NLGN1,GABRA1,LRP1B,CNTFR,CD3E,PEX5L,GPR20,RAMP2,SHANK2,NTRK2,GRIA3,KIT,PTPRB,PTK2B,GABRB2,TLR7,TLR4,PPARG,CUBN,CHRNA9,CSF3R,GFRA4,GABRB3,ITGB3,CSF1R,IL2RG,CD36,GPRC5B,GRM7,ROS1,HTR2C,CSF2RA,CHRNB2,PTPN6,IL18R1,RAMP3,GRIA1,CD247,INSRR,LY96,VWC2,TNFRSF1B,VLDLR,LEPR,CHRNA7,EPHB1,FLT4,PDGFRB,PLXNA2,CALCRL,AHR,EPHA4,VIPR1,NRP2…
GO:CC	membrane	11.4175	9829	1255	781	18964	OSR1,TSHR,SLC35F3,EN1,AQP5,SCTR,RASSF9,TRABD2A,SLC5A8,KCNMB1,CNTN5,DLL1,ABRA,PRKAR2B,FAM107A,ALOX5,APOB,CNTN2,SLCO2A1,TNMD,PCDH10,SEMA5A,FGG,SPTSSB,DMRT2,CHRNA4,SYPL1,TRPC4,FABP5,SLN,ADGRB1,MOXD1,CSMD3,MAP7,GRIK2,BMP2,PSD2,TMC3,TRPA1,NPY1R,LRRN2,CSMD1,SNTG1,ASIC2,CDH17,SMAGP,NCS1,SLC6A4,GSG1L,TNC,NTRK3,CHRNB4,AMER3,ADGRA1,GPR37,DLK1,UNC5D,SPINK5,LRRN3,KNG1,PTPRN2,GABRA3,ARHGAP15,GP9,ECEL1,UPK1B,S…
GO:CC	postsynaptic membrane	11.0654	282	1255	57	18964	CNTN2,CHRNA4,GRIK2,SLC6A4,GSG1L,NTRK3,CHRNB4,GABRA3,NSG1,GABRA5,LRRC4C,NLGN1,GABRA1,LRRTM2,KCNMA1,FLRT3,SHANK2,GRIA3,NRGN,CLSTN2,NLGN4Y,KCNC2,SLITRK3,CNTN1,GABRB2,FAIM2,PCDH8,GRID1,DRD3,GRIK1,CHRNA9,CBLN1,GABRB3,IGSF9B,ITGB3,GRM7,CHRNB2,GRIA1,CDH10,CHRM3,TRPV1,LRRTM4,CHRNA7,TENM2,KCNB1,EPHA4,NRP2,KCNA3,ADAM22,EPHA7,PDLIM4,GRIK4,GRIN3B,GLRB,SYNE1,COL13A1,TIAM1
GO:CC	ion channel complex	10.2853	302	1255	58	18964	KCNMB1,CHRNA4,TRPC4,GRIK2,CHRNB4,GABRA3,GABRA5,NLGN1,GABRA1,CACNA1D,KCNF1,KCNMA1,KCNV1,KCNJ8,ANO6,HCN4,SHANK2,GRIA3,KCNMB4,KCNE4,CACNA1G,PTK2B,KCNG4,KCNB2,KCNC2,GABRB2,TRPC6,CHRNA9,DPP6,GABRB3,KCNQ3,KCNS1,KCNQ5,SNAP25,UNC80,CACNA1B,CHRNB2,HCN1,GRIA1,DPP10,VWC2,KCNA2,SCN9A,SCN11A,CHRNA7,KCNAB1,CACNA1E,KCNB1,KCNA3,CACNA1H,CLCN2,GRIK4,GRIN3B,CLIC2,BEST3,HSPA2,GLRB,ABCC9
GO:CC	collagen trimer	9.28518	95	1255	29	18964	LUM,COL20A1,ADIPOQ,C1QC,COL14A1,COL26A1,COL8A1,COLEC11,C1QL1,COLEC10,C1QA,EMID1,COL9A3,MARCO,COL9A1,C1QTNF7,CD36,COL6A1,COL9A2,COL5A1,COL12A1,CTHRC1,COL6A2,DCN,COL5A2,COL1A2,COL6A3,COL1A1,COL13A1
GO:CC	neuronal cell body	9.2767	523	1255	80	18964	CALB1,PRKAR2B,APOB,CNTN2,CHRNA4,BRINP3,CCN3,GRIK2,PSD2,ASIC2,VIP,GABRA5,RET,SERPINF1,DSCAM,ADCY8,PVALB,CCK,PDE1A,BRINP1,PENK,SLC6A2,SHANK2,NRGN,SLC4A8,RTN4R,PTK2B,PCSK2,KCNB2,KCNC2,USH2A,TUBB3,INHA,MME,CCR2,MPL,ASTN2,CPLX1,DRP2,TRPM2,KLHL14,SNCAIP,CX3CR1,MAP2,SYNPO,AKAP12,CYBB,CYP17A1,GRIA1,ZNF804A,TRPV1,KCNA2,SNCA,TNFRSF1B,UNC5C,UCHL1,KCNAB1,DNER,TNN,KCNB1,CTSV,EPHA4,P2RX3,DAB1,EPHA7,STAR,COBL,M…
GO:CC	cell body	9.1632	595	1255	87	18964	CALB1,PRKAR2B,APOB,CNTN2,CHRNA4,BRINP3,CCN3,GRIK2,PSD2,ASIC2,VIP,GABRA5,RET,SERPINF1,DSCAM,ADCY8,PVALB,CD3E,CCK,PDE1A,BRINP1,PENK,SLC6A2,SHANK2,NRGN,GNB3,TMEM132E,SLC4A8,RTN4R,PTK2B,PCSK2,KCNB2,KCNC2,USH2A,TUBB3,INHA,MME,CCR2,MPL,ASTN2,CPLX1,DRP2,TRPM2,KLHL14,SNCAIP,CX3CR1,MAP2,SYNPO,AKAP12,CYBB,CYP17A1,GRIA1,MAPK8IP1,ACTA2,ZNF804A,TRPV1,KCNA2,SNCA,TNFRSF1B,UNC5C,UCHL1,KCNAB1,DNER,TNN,KCNB1,CTSV,…
GO:CC	distal axon	8.91143	307	1255	56	18964	NTS,CALB1,GRIK2,NCS1,NEFL,PTPRN2,STMN4,DSCAM,NMU,CCK,PENK,FLRT3,SLC18A3,SHANK2,NTRK2,SCGN,SLC4A8,RTN4R,LAMP5,PTK2B,KCNC2,USH2A,TSHZ3,TUBB3,CPLX1,AUTS2,BOC,SNAP25,MAP2,PRSS12,MAPK8IP1,ZNF804A,CHRM3,KCNA2,SNCA,UNC5C,NGEF,TNN,TENM2,ATCAY,EPHA4,P2RX3,KCNA3,MICAL1,COBL,MAP1B,LRRK2,THY1,TRPV2,BASP1,DPYSL3,OLFM1,HTR1B,SLC4A10,NGFR,TIAM1
GO:CC	transmembrane transporter complex	8.89052	325	1255	58	18964	KCNMB1,CHRNA4,TRPC4,GRIK2,CHRNB4,GABRA3,GABRA5,NLGN1,GABRA1,CACNA1D,KCNF1,KCNMA1,KCNV1,KCNJ8,ANO6,HCN4,SHANK2,GRIA3,KCNMB4,KCNE4,CACNA1G,PTK2B,KCNG4,KCNB2,KCNC2,GABRB2,TRPC6,CHRNA9,DPP6,GABRB3,KCNQ3,KCNS1,KCNQ5,SNAP25,UNC80,CACNA1B,CHRNB2,HCN1,GRIA1,DPP10,VWC2,KCNA2,SCN9A,SCN11A,CHRNA7,KCNAB1,CACNA1E,KCNB1,KCNA3,CACNA1H,CLCN2,GRIK4,GRIN3B,CLIC2,BEST3,HSPA2,GLRB,ABCC9
REAC	Extracellular matrix organization	13.1387	298	758	65	10622	LUM,COL20A1,ASPN,VWF,FGG,ADAMTS18,TTR,BMP2,TNC,P4HA3,OPTC,FBLN5,COL14A1,ADAM19,COL26A1,COL8A1,P3H2,HAPLN1,FBN2,ADAMTS9,FGB,TNR,COL9A3,CTSK,CTSS,MFAP2,COL9A1,ITGB3,SCUBE1,CAPN6,COL6A1,PECAM1,COL9A2,BCAN,P3H3,VTN,COL5A1,ADAMTS2,MMP2,PDGFB,SDC2,COL12A1,NTN4,MATN4,LAMA4,COL6A2,TNN,FBN3,CTSV,JAM2,DCN,COL5A2,COL1A2,COL6A3,TLL2,FBLN2,COL1A1,FBN1,ITGB2,PCOLCE2,SDC3,CTSB,SDC4,MMP16,COL13A1
REAC	Neuronal System	7.84827	400	758	67	10622	KCNMB1,PRKAR2B,CHRNA4,GRIK2,SLC6A4,NTRK3,CHRNB4,NEFL,GABRA3,GABRA5,NLGN1,GABRA1,LRRTM2,ADCY8,KCNF1,KCNMA1,KCNV1,KCNJ8,HCN4,PPFIA2,SLC18A3,SHANK2,GRIA3,KCNMB4,NRGN,GNB3,NLGN4Y,KCNG4,KCNB2,KCNC2,SLITRK3,GNGT2,GABRB2,TUBB3,NCALD,CPLX1,GRIK1,CHRNA9,GABRB3,SYT1,KCNQ3,KCNS1,KCNQ5,SNAP25,ACHE,SLITRK4,CACNA1B,CHRNB2,SLITRK6,HCN1,GRIA1,ADCY2,PRKX,LRRTM4,KCNA2,CHRNA7,KCNAB1,CACNA1E,KCNB1,NAAA,SYT9,KCNA3,GR…
REAC	Collagen biosynthesis and modifying enzymes	6.53471	67	758	22	10622	COL20A1,P4HA3,COL14A1,COL26A1,COL8A1,P3H2,COL9A3,COL9A1,COL6A1,COL9A2,P3H3,COL5A1,ADAMTS2,COL12A1,COL6A2,COL5A2,COL1A2,COL6A3,TLL2,COL1A1,PCOLCE2,COL13A1
REAC	Collagen formation	6.09129	89	758	25	10622	COL20A1,P4HA3,COL14A1,COL26A1,COL8A1,P3H2,COL9A3,CTSS,COL9A1,COL6A1,COL9A2,P3H3,COL5A1,ADAMTS2,COL12A1,COL6A2,CTSV,COL5A2,COL1A2,COL6A3,TLL2,COL1A1,PCOLCE2,CTSB,COL13A1
REAC	Degradation of the extracellular matrix	5.8781	140	758	32	10622	ADAMTS18,OPTC,COL14A1,COL26A1,COL8A1,FBN2,ADAMTS9,COL9A3,CTSK,CTSS,COL9A1,SCUBE1,CAPN6,COL6A1,COL9A2,BCAN,COL5A1,MMP2,COL12A1,COL6A2,FBN3,CTSV,DCN,COL5A2,COL1A2,COL6A3,TLL2,COL1A1,FBN1,CTSB,MMP16,COL13A1
REAC	ECM proteoglycans	5.49314	75	758	22	10622	LUM,ASPN,TNC,HAPLN1,TNR,COL9A3,COL9A1,ITGB3,COL6A1,COL9A2,BCAN,VTN,COL5A1,MATN4,LAMA4,COL6A2,TNN,DCN,COL5A2,COL1A2,COL6A3,COL1A1
REAC	Integrin cell surface interactions	5.20181	84	758	23	10622	LUM,VWF,FGG,TNC,COL8A1,FGB,COL9A3,COL9A1,ITGB3,COL6A1,PECAM1,COL9A2,VTN,COL5A1,COL6A2,JAM2,COL5A2,COL1A2,COL6A3,COL1A1,FBN1,ITGB2,COL13A1
REAC	Collagen chain trimerization	4.8941	44	758	16	10622	COL20A1,COL14A1,COL26A1,COL8A1,COL9A3,COL9A1,COL6A1,COL9A2,COL5A1,COL12A1,COL6A2,COL5A2,COL1A2,COL6A3,COL1A1,COL13A1
REAC	NCAM1 interactions	4.33315	42	758	15	10622	CNTN2,CACNA1D,ST8SIA2,CACNA1G,COL9A3,COL9A1,GFRA4,COL6A1,COL9A2,ST8SIA4,COL5A1,COL6A2,CACNA1H,COL5A2,COL6A3
REAC	Regulation of Insulin-like Growth Factor (IGF) transport and uptake by Insulin-like Growth Factor Binding Proteins (IGFBPs)	4.16448	124	758	27	10622	APOB,FGG,CHRDL1,ITIH2,TNC,SPP2,KNG1,SERPIND1,ALB,TF,PAPPA2,PENK,CHGB,VWA1,MXRA8,FAM20C,F2,MMP2,SDC2,NOTUM,APOA1,IGFBP5,F5,GPC3,FBN1,IGFBP3,ANO8
REAC	Collagen degradation	3.80434	64	758	18	10622	COL14A1,COL26A1,COL8A1,COL9A3,CTSK,COL9A1,COL6A1,COL9A2,COL5A1,MMP2,COL12A1,COL6A2,COL5A2,COL1A2,COL6A3,COL1A1,CTSB,COL13A1
REAC	Post-translational protein phosphorylation	3.71977	107	758	24	10622	APOB,FGG,CHRDL1,ITIH2,TNC,SPP2,KNG1,SERPIND1,ALB,TF,PENK,CHGB,VWA1,MXRA8,FAM20C,SDC2,NOTUM,APOA1,IGFBP5,F5,GPC3,FBN1,IGFBP3,ANO8
REAC	Assembly of collagen fibrils and other multimeric structures	3.52552	60	758	17	10622	COL14A1,COL8A1,COL9A3,CTSS,COL9A1,COL6A1,COL9A2,COL5A1,COL12A1,COL6A2,CTSV,COL5A2,COL1A2,COL6A3,TLL2,COL1A1,CTSB
REAC	GPCR ligand binding	3.46635	459	758	62	10622	NTS,TSHR,SCTR,RLN3,WNT9A,NPY1R,GPR37,KNG1,VIP,HTR2B,GRM8,NMU,CCK,PENK,EDN2,PRLH,RAMP2,VIPR2,C3AR1,OPN5,GNB3,BDKRB1,WNT4,RXFP1,ACKR4,GNGT2,UTS2R,LPAR6,CCR2,NPY5R,DRD3,PROK1,CXCR4,P2RY13,GRM7,CX3CR1,HTR2C,MC5R,ACKR2,EDN1,RAMP3,P2RY6,PTAFR,F2,CHRM3,PLPPR5,FZD9,CALCRL,APLN,VIPR1,GPR183,APLNR,CMKLR1,CCR7,NPY2R,HTR1B,NPY,WNT16,PTGER3,PLPPR3,F2RL2,AGTR2
REAC	Platelet activation, signaling and aggregation	2.90585	258	758	40	10622	VWF,FGG,MMRN1,SPP2,KNG1,GP9,ALB,TF,SERPINF2,F13A1,HGF,CD9,GNB3,GNGT2,TRPC6,FGB,MPL,THPO,ITGB3,CD36,PTPN6,LCP2,PECAM1,F2,PDGFB,RARRES2,APOA1,F5,COL1A2,SYK,GP1BB,COL1A1,SYTL4,DGKH,RHOB,PLEK,PIK3R5,F2RL2,VEGFC,DGKZ
REAC	Class A/1 (Rhodopsin-like receptors)	2.79596	328	758	47	10622	NTS,TSHR,RLN3,NPY1R,GPR37,KNG1,HTR2B,NMU,CCK,PENK,EDN2,PRLH,C3AR1,OPN5,BDKRB1,RXFP1,ACKR4,UTS2R,LPAR6,CCR2,NPY5R,DRD3,PROK1,CXCR4,P2RY13,CX3CR1,HTR2C,MC5R,ACKR2,EDN1,P2RY6,PTAFR,F2,CHRM3,PLPPR5,APLN,GPR183,APLNR,CMKLR1,CCR7,NPY2R,HTR1B,NPY,PTGER3,PLPPR3,F2RL2,AGTR2
REAC	Syndecan interactions	2.50128	26	758	10	10622	TNC,ITGB3,VTN,COL5A1,SDC2,COL5A2,COL1A2,COL1A1,SDC3,SDC4
REAC	Platelet Aggregation (Plug Formation)	2.39416	38	758	12	10622	VWF,FGG,GP9,FGB,MPL,THPO,ITGB3,F2,COL1A2,SYK,GP1BB,COL1A1
REAC	Potassium Channels	2.29506	103	758	21	10622	KCNMB1,KCNF1,KCNMA1,KCNV1,KCNJ8,HCN4,KCNMB4,GNB3,KCNG4,KCNB2,KCNC2,GNGT2,KCNQ3,KCNS1,KCNQ5,HCN1,KCNA2,KCNAB1,KCNB1,KCNA3,ABCC9
REAC	Formation of Fibrin Clot (Clotting Cascade)	2.26331	39	758	12	10622	VWF,FGG,KNG1,GP9,SERPIND1,F13A1,PRCP,FGB,TFPI,F2,F5,GP1BB
REAC	NCAM signaling for neurite out-growth	2.22376	59	758	15	10622	CNTN2,CACNA1D,ST8SIA2,CACNA1G,COL9A3,COL9A1,GFRA4,COL6A1,COL9A2,ST8SIA4,COL5A1,COL6A2,CACNA1H,COL5A2,COL6A3
REAC	Stimuli-sensing channels	2.15931	105	758	21	10622	TRPC4,TRPA1,ASIC2,ANO6,TRPM3,TRPC6,TRPM2,ASIC1,UNC80,SGK1,UNC79,ANO3,TRPV1,NALCN,CLCN2,TRPV2,CLIC2,BEST3,ASIC4,ANO5,ANO8
REAC	G alpha (i) signalling events	2.13585	398	758	52	10622	RLN3,PRKAR2B,APOB,TTR,NPY1R,GPR37,KNG1,RGS4,ADCY8,GRM8,NMU,PDE1A,PENK,BCO2,C3AR1,OPN5,GNB3,APOC3,BDKRB1,RGS5,GNGT2,GNAZ,CCR2,NPY5R,DRD3,CXCR4,P2RY13,GRM7,CX3CR1,STRA6,ADCY2,PRKX,SDC2,PPP3CA,AKR1B10,APLN,APOA1,RGS7,RGS18,GPC4,GPR183,APLNR,CCR7,GPC3,NPY2R,SDC3,HTR1B,SDC4,NPY,LPL,PTGER3,AGTR2
REAC	Axon guidance	2.07022	549	758	66	10622	HOXA2,ISL1,CNTN2,SEMA5A,TRPC4,UNC5D,RET,DSCAM,CACNA1D,SEMA3A,RELN,CHL1,FLRT3,TREM2,DCX,ST8SIA2,CACNA1G,DSCAML1,CNTN1,TUBB3,NELL2,TRPC6,ROBO2,NFASC,COL9A3,COL9A1,GFRA4,CXCR4,KCNQ3,ITGB3,COL6A1,COL9A2,ST8SIA4,COL5A1,DPYSL4,SCN9A,SCN11A,MMP2,VLDLR,UNC5C,EPHB1,SDC2,NTN4,NGEF,COL6A2,PLXNA2,EPHA4,SEMA6A,SLIT1,NRP2,EPHA3,DAB1,ROBO1,EPHA7,CACNA1H,COL5A2,COL6A3,MAPK11,EFNA2,DOK1,DPYSL3,RHOB,DOK2,UNC5B,TIA…
REAC	Peptide ligand-binding receptors	1.99172	195	758	31	10622	NTS,RLN3,NPY1R,GPR37,KNG1,NMU,CCK,PENK,EDN2,PRLH,C3AR1,BDKRB1,RXFP1,ACKR4,UTS2R,CCR2,NPY5R,PROK1,CXCR4,CX3CR1,MC5R,ACKR2,EDN1,F2,APLN,APLNR,CCR7,NPY2R,NPY,F2RL2,AGTR2
REAC	Defective B3GALTL causes Peters-plus syndrome (PpS)	1.99144	35	758	11	10622	SEMA5A,ADAMTS18,SBSPON,THBS2,ADAMTSL2,ADAMTS9,ADAMTSL1,THSD1,ADAMTS2,ADAMTS15,B3GLCT
REAC	Nervous system development	1.98976	574	758	68	10622	HOXA2,ISL1,CNTN2,SEMA5A,TRPC4,UNC5D,RET,DSCAM,CACNA1D,SEMA3A,RELN,CHL1,FLRT3,TREM2,DCX,ST8SIA2,CACNA1G,DSCAML1,CNTN1,TUBB3,NELL2,TRPC6,ROBO2,NFASC,COL9A3,DRP2,COL9A1,GFRA4,CXCR4,KCNQ3,ITGB3,COL6A1,COL9A2,ST8SIA4,COL5A1,DPYSL4,SCN9A,SCN11A,MMP2,VLDLR,UNC5C,EPHB1,SDC2,NTN4,NGEF,COL6A2,PLXNA2,EPHA4,SEMA6A,SLIT1,NRP2,EPHA3,DAB1,ROBO1,EPHA7,CACNA1H,COL5A2,COL6A3,MAPK11,EFNA2,DOK1,DPYSL3,RHOB,PMP22,DOK…
REAC	O-glycosylation of TSR domain-containing proteins	1.86173	36	758	11	10622	SEMA5A,ADAMTS18,SBSPON,THBS2,ADAMTSL2,ADAMTS9,ADAMTSL1,THSD1,ADAMTS2,ADAMTS15,B3GLCT
REAC	Voltage gated Potassium channels	1.78505	43	758	12	10622	KCNF1,KCNV1,KCNG4,KCNB2,KCNC2,KCNQ3,KCNS1,KCNQ5,KCNA2,KCNAB1,KCNB1,KCNA3
REAC	Transmission across Chemical Synapses	1.71535	259	758	37	10622	PRKAR2B,CHRNA4,GRIK2,SLC6A4,CHRNB4,NEFL,GABRA3,GABRA5,GABRA1,ADCY8,PPFIA2,SLC18A3,GRIA3,NRGN,GNB3,GNGT2,GABRB2,TUBB3,NCALD,CPLX1,GRIK1,CHRNA9,GABRB3,SYT1,SNAP25,ACHE,CACNA1B,CHRNB2,GRIA1,ADCY2,PRKX,CHRNA7,CACNA1E,NAAA,GRIK4,GRIN3B,GLRB
REAC	Retinoid metabolism and transport	1.67552	44	758	12	10622	APOB,TTR,BCO2,APOC3,SDC2,AKR1B10,APOA1,GPC4,GPC3,SDC3,SDC4,LPL

## Sheet: AT GO TERM NETWORK
Pathway	Fold Enrichment	Enrichment FDR	nGenes	Pathway Genes	URL	Genes
Mitochondrion	2.05286	1.66759e-12	126	884	http://amigo.geneontology.org/amigo/term/GO:0005739	TIMM44 ATP5MC1 COX10 STOM NFS1 MDH2 PMPCA PLEKHN1 OGDHL GOT2 UQCRC2 CHCHD2 ETFA ERBB4 DHTKD1 ALAS2 AIFM1 DMGDH PPTC7 PPIF ISCU ACAD9 DBT AKAP1 UQCRC1 BDH1A ACADS ABAT FAM162A AIFM3 DNAJA3 DLAT NDUFS3 HSPD1 MRPS5 NDUFS1 GPAM PAK5 PRDX3 ETFDH SLC25A12 LRPPRC COQ6 ALDH6A1 DLST SLC25A4 CPT2 CYC PPM1K MPC1 PRKN SOD2 ACO2 SLC9B2 MTERF2 ALDH1L2 YARS2 DNM1L CECR5 BCL2L13 PDK1 PRELID3A FAM210A GSTK1 NNT M…
Actin cytoskeleton	2.0393	0.000186959	48	339	http://amigo.geneontology.org/amigo/term/GO:0015629	TNNT2 TNNI1 MYO1D TNNC1 TMOD1 TPM4 PEAK1 ABLIM3 MYLK3 SLC2A1 MYOZ1 MSRB1 DYNLL2 TNNC2 SVIL DNAJA3 TBX5 NEXN ABLIM1 ACTC1 RHOQ CFL2 PAWR PDLIM5 CORIN EFR3B HSPB7 MYH1D MYH1G MYH1E NEBL NPM3 MYH1C SRCIN1 MYH7 MYO7L2 MYO3AL MYH1A MYH1B CNN1 MYH1F MYO18B CNR1 SHROOM3
Mitochondrial envelope	1.91102	0.00304152	41	309	http://amigo.geneontology.org/amigo/term/GO:0005740	TIMM44 PMPCA PLEKHN1 UQCRC2 CHCHD2 AIFM1 PPIF ACAD9 AIFM3 NDUFS3 HSPD1 NDUFS1 ETFDH SLC25A12 SLC25A4 CYC MPC1 SLC9B2 DNM1L PRELID3A AFG1L RTN4IP1 MPC2 FBXL4 IMMT GHITM UQCRFS1 LOC107049545 TMEM70 ATP5F1B TRAP1 NDUFS8 UQCC1 SDHB MFN1 C19orf70 CNR1 TMEM14CL NAT8L
Mitochondrial membrane	1.76783	0.0218568	34	277	http://amigo.geneontology.org/amigo/term/GO:0031966	TIMM44 PMPCA PLEKHN1 UQCRC2 ACAD9 AIFM3 NDUFS3 HSPD1 NDUFS1 ETFDH SLC25A12 SLC25A4 MPC1 SLC9B2 DNM1L AFG1L RTN4IP1 MPC2 IMMT GHITM UQCRFS1 TMEM70 ATP5F1B TRAP1 NDUFS8 UQCC1 SDHB MFN1 C19orf70 CNR1 TMEM14CL NAT8L
Transporter complex	1.8786	0.0192658	30	230	http://amigo.geneontology.org/amigo/term/GO:1990351	UQCRC2 SCN5A ABCC8 TRPC5 KCNG1 NDUFS3 CACNA2D1 CACNB2 NDUFS1 SESTD1 AKAP6 KCNJ3 CACNA1C EPS8 ATP10D ATP8A1 FKBP12.6 KCNJ11 UQCRFS1 CACNG4 PLN CACNG1 KCNG2 CATSPER2 CACNG3 CNGA3 NDUFS8 ATP11A ATP10A SCN1B
Contractile fiber	3.91526	5.60473e-08	28	103	http://amigo.geneontology.org/amigo/term/GO:0043292	BMP10 TNNT2 TNNI1 MYL4 TNNC1 HSPB1 TMOD1 MYOZ1 MYL3 TNNC2 SVIL MYBPC3 NRAP PPP2R5A ACTC1 CFL2 ACTN2 MYOM1 FKBP12.6 FHL2 SMPX LMOD1 NEBL CATSPER2 MYO18B
Myofibril	3.92798	7.2276e-08	27	99	http://amigo.geneontology.org/amigo/term/GO:0030016	BMP10 TNNT2 TNNI1 MYL4 TNNC1 HSPB1 TMOD1 MYOZ1 MYL3 TNNC2 SVIL MYBPC3 NRAP PPP2R5A ACTC1 CFL2 ACTN2 MYOM1 FKBP12.6 FHL2 SMPX LMOD1 NEBL CATSPER2 MYO18B
Mitochondrial matrix	2.2504	0.0062026	25	160	http://amigo.geneontology.org/amigo/term/GO:0005759	TIMM44 NFS1 PMPCA OGDHL ETFA ALAS2 PPTC7 DBT DNAJA3 HSPD1 MRPS5 LRPPRC SOD2 MTERF2 PDK1 MRPS27 MRPL39 PCCA OAT LACTB2 ATP5F1B TRAP1 LONP1 MRPL15
Sarcomere	4.01932	3.03332e-07	24	86	http://amigo.geneontology.org/amigo/term/GO:0030017	BMP10 TNNT2 TNNI1 MYL4 TNNC1 HSPB1 TMOD1 MYOZ1 MYL3 TNNC2 MYBPC3 PPP2R5A ACTC1 CFL2 ACTN2 MYOM1 FKBP12.6 FHL2 SMPX NEBL CATSPER2 MYO18B
Myosin complex	4.20075	0.000244321	14	48	http://amigo.geneontology.org/amigo/term/GO:0016459	MYO1D DYNLL2 MYH1D MYH1G MYH1E MYH1C MYH7 MYO7L2 MYO3AL MYH1A MYH1B MYH1F MYO18B
I band	3.60064	0.00149294	14	56	http://amigo.geneontology.org/amigo/term/GO:0031674	BMP10 HSPB1 MYOZ1 MYL3 PPP2R5A ACTC1 CFL2 ACTN2 FKBP12.6 FHL2 NEBL CATSPER2 MYO18B
Sarcolemma	3.20057	0.0103961	12	54	http://amigo.geneontology.org/amigo/term/GO:0042383	ANK3 SGCD NOS1 CACNA2D1 CACNB2 CACNA1C POPDC2 BVES PDE9A KCNJ11 CACNG4 CATSPER2
Z disc	3.16857	0.0176469	11	50	http://amigo.geneontology.org/amigo/term/GO:0030018	BMP10 HSPB1 MYOZ1 PPP2R5A CFL2 ACTN2 FKBP12.6 FHL2 NEBL MYO18B
Calcium channel complex	3.79015	0.00865463	10	38	http://amigo.geneontology.org/amigo/term/GO:0034704	TRPC5 CACNA2D1 CACNB2 SESTD1 AKAP6 CACNA1C FKBP12.6 CACNG4 CACNG1 CATSPER2
Myofilament	6.64734	0.0063046	6	13	http://amigo.geneontology.org/amigo/term/GO:0036379	TNNT2 TNNI1 TNNC1 TMOD1 TNNC2 MYBPC3
A band	6.17253	0.00865463	6	14	http://amigo.geneontology.org/amigo/term/GO:0031672	MYL4 MYL3 MYBPC3 PPP2R5A MYOM1 SMPX
Striated muscle thin filament	6.00107	0.0218568	5	12	http://amigo.geneontology.org/amigo/term/GO:0005865	TNNT2 TNNI1 TNNC1 TMOD1 TNNC2
L-type voltage-gated calcium channel complex	9.60172	0.0112349	4	6	http://amigo.geneontology.org/amigo/term/GO:1990454	CACNA2D1 CACNB2 CACNA1C CACNG4
Troponin complex	8.23004	0.0192658	4	7	http://amigo.geneontology.org/amigo/term/GO:0005861	TNNT2 TNNI1 TNNC1 TNNC2
Phospholipid-translocating ATPase complex	8.23004	0.0192658	4	7	http://amigo.geneontology.org/amigo/term/GO:1990531	ATP10D ATP8A1 ATP11A ATP10A

## Sheet: SAN GO TERM NETWORK
Pathway	Fold Enrichment	Enrichment FDR	nGenes	Pathway Genes	URL	Genes
Extracellular region	2.0105	2.35581e-18	179	957	http://amigo.geneontology.org/amigo/term/GO:0005576	ANGPTL4 EDN2 TSKU MMEL1 ADAMTS15 VWA1 ERFE GPRC5B TFPI ADAMTSL2 SERPINF2 SERPINF1 SS2 MMP2 GDNF ASAH2 GRIA1 ANGPTL1 DNAH1 GPX3 FBLN2 WNT7A CA4 WNT9A ADIPOQ COL6A1 DSL1 JSC RBP4 BPI VSTM2L SRPX2 APOA1 OSTN CILP MASP1 KAZALD1 RELN P37NB ARRDC1 CUBN FLRT3 PCSK2 SFRP2 TFPI2 VLDLR GLIPR1L SNCA FLRT2 FBLN5 AGT THBS2 KITLG DLK1 KERA LUM DCN IHH IGFBP5 GC MGP PRSS12 EGF CYTH4 TNFIP6 EDN1 IGF1 SERPINB5 VW…
Intrinsic component of plasma membrane	2.34636	5.27046e-21	148	678	http://amigo.geneontology.org/amigo/term/GO:0031226	ITGB3 KCNA2 CNTN2 RNF43 PLXNA2 STRA6 GABRB2 GABRA1 KCNIP1 LRRTM2 RET ADGRD1 CALCRL CHRNB4 OXTR SLC6A2 ASAH2 P2RX7 KCNS1 GRIA1 SLC6A4 KCNB1 KCNMA1 EPHA4 CYP8B1 CA4 KCNG4 TRPM2 CHRNA4 FLT4 HTR2C LOC395944 GPC4 GPC3 TMC3 EPHB1 GRIK4 GPC2 THY1 TLR4 IGDCC3 ITGB2 CACNA1G HTR2B RTN4R LRRC4C TENM1 NRP2 FLRT3 ADAM22 CNTN1 PCDH10 KCNMB4 MDGA1 KCNC2 KCNAB1 FLRT2 GPR65 KCNK10 CHRM1 SLC6A15 DPP10 SLC28A3 NTRK…
Cell junction	1.61728	5.79071e-08	147	977	http://amigo.geneontology.org/amigo/term/GO:0030054	ITGB3 KCNA2 CNTN2 cldn5 GABRB2 GABRA1 C10H15ORF59 LCP2 LRRTM2 PCDH12 PCDH1 CHRNB2 CHRNB4 NPTX2 P2RX7 GRIA1 CHRNA7 ELFN1 SLC6A4 TNN C1QB KCNMA1 WNT7A EPHA4 SYT9 CHRNA4 GPC4 ARHGAP22 DPEP1 CLMP EPHB1 GRIK4 FAM107A LRRK2 SLITRK4 IL1RAP DSCAML1 CD3E CACNA1G HTR2B ARHGAP21 LRRC4C PRKAR2B NRP2 FLRT3 ADAM22 SNAP25 CNTN1 MDGA1 KCNC2 MME SNCA STON2 FLRT2 PPFIA2 DLL1 BIN1 SYNPO2 PRSS12 NTRK2 NCS1 CDH20 BAS…
Integral component of plasma membrane	2.2985	1.42147e-18	136	636	http://amigo.geneontology.org/amigo/term/GO:0005887	ITGB3 KCNA2 RNF43 PLXNA2 STRA6 GABRB2 GABRA1 KCNIP1 LRRTM2 RET ADGRD1 CALCRL CHRNB4 OXTR SLC6A2 ASAH2 P2RX7 KCNS1 GRIA1 SLC6A4 KCNB1 KCNMA1 EPHA4 CYP8B1 KCNG4 TRPM2 CHRNA4 FLT4 HTR2C LOC395944 TMC3 EPHB1 GRIK4 TLR4 IGDCC3 ITGB2 CACNA1G HTR2B LRRC4C TENM1 NRP2 FLRT3 ADAM22 PCDH10 KCNMB4 KCNC2 KCNAB1 FLRT2 GPR65 KCNK10 CHRM1 SLC6A15 DPP10 SLC28A3 NTRK2 VWC2 INSRR OPRM1 CHRNA9 HTR1A EPHB6 C7 HCN1 UP…
Extracellular space	1.95899	7.52091e-11	115	631	http://amigo.geneontology.org/amigo/term/GO:0005615	ANGPTL4 EDN2 TSKU MMEL1 ADAMTS15 ERFE GPRC5B TFPI SERPINF2 SERPINF1 SS2 MMP2 GDNF ASAH2 ANGPTL1 GPX3 CA4 ADIPOQ DSL1 JSC RBP4 BPI SRPX2 APOA1 OSTN CILP MASP1 RELN P37NB CUBN FLRT3 PCSK2 SFRP2 VLDLR GLIPR1L SNCA FLRT2 FBLN5 AGT KITLG DLK1 KERA LUM DCN IHH IGFBP5 GC EGF TNFIP6 EDN1 IGF1 SERPINB5 VWC2 SCUBE1 CCL26 LPL BMP5 C4A CD9 SERPINB1 GAL9 FAM19A5 IL8 DKK2 WNT16 CNTFR CTSK PTX3 METRNL IL34 Cbln…
Synapse	2.0143	2.08211e-11	113	603	http://amigo.geneontology.org/amigo/term/GO:0045202	ITGB3 KCNA2 CNTN2 GABRB2 GABRA1 C10H15ORF59 LRRTM2 CHRNB2 CHRNB4 NPTX2 P2RX7 GRIA1 CHRNA7 ELFN1 SLC6A4 TNN C1QB KCNMA1 WNT7A EPHA4 SYT9 CHRNA4 GPC4 ARHGAP22 EPHB1 GRIK4 LRRK2 SLITRK4 IL1RAP DSCAML1 CD3E CACNA1G HTR2B LRRC4C PRKAR2B NRP2 FLRT3 ADAM22 SNAP25 CNTN1 MDGA1 KCNC2 MME SNCA STON2 PPFIA2 BIN1 PRSS12 NTRK2 NCS1 SYNE1 CHRNA9 MAP1B LAMA4 NSG1 DRD3 CPLX1 PENK GRIK2 EPHA7 HAPLN1 HTR1B LRRTM1 D…
Neuron projection	2.20658	1.35952e-12	101	492	http://amigo.geneontology.org/amigo/term/GO:0043005	TUBB3 KCNA2 CNTN2 GABRA1 BBS4 ATCAY DNER CRABP-I GRIA1 ELFN1 TRPV2 TNN EPHA4 GNG13 NEU4 EPHB1 GNAZ THY1 BRINP1 LRRK2 CD3E CACNA1G HTR2B DCX PRKAR2B CYP17A1 RELN CNTN4 NRP2 VIM FLRT3 LAMP5 ADAM22 SNAP25 USH2A TPH2 KCNC2 KCNAB1 MME SNCA STON2 RIN3 PPFIA2 BIN1 PRSS12 UNC5C PVALB NTRK2 NCS1 COBL VIP OPRM1 UCH-L1 HCN1 MAP1B NSG1 CPLX1 PENK EPHA7 NCAM2 HTR1B LRRTM1 DSCAM GABRA5 PCDH9 GABRG4 ZNF804A RGS…
Cell surface	2.08771	2.44048e-08	74	381	http://amigo.geneontology.org/amigo/term/GO:0009986	ITGB3 CNTN2 ADAMTS15 MXRA8 UNC5D TFPI P2RX7 SDC4 GRIA1 TRPV2 TNN WNT7A CA4 ADIPOQ CSF1R GPC4 FAS NRROS THY1 TLR4 DSCAML1 CD3E RTN4R CD36 APMAP PLA2R1 PDGFB CXCR4 PDGFRA SCUBE1 CD38 EPHB6 IQGAP2 AQP4 ROBO1 ROBO2 JAM2 NLGN4 SLITRK6 ENOX1 TRPC4 CD9 ACKR3 RAMP2 THSD1 CTSK BMP2 CTSB RSPO2 IL31RA SDC2 AQP11 BF1 CDH17 NGFR CCR5 RAMP3 CLSTN2 KCNQ3 CX3CR1 KIT ADGRF5 SULF1 nlgn1 GPR37 ADAMTS9 FZD9 IL1R1 CD…
Plasma membrane protein complex	2.11139	1.00943e-07	66	336	http://amigo.geneontology.org/amigo/term/GO:0098797	BLB1 ITGB3 KCNA2 KCNIP1 RET CALCRL CHRNB4 CACNA1E KCNS1 GRIA1 KCNB1 KCNMA1 GNG13 CACNA1D KCNG4 CHRNA4 LOC395944 FAS GRIK4 CD3E ITGB2 CACNA1G CAV3 CACNA1B KCNMB4 KCNC2 KCNAB1 DPP10 IGF1 CDH20 VWC2 CHRNA9 PTPN6 C7 HCN1 EVC2 EVC SYK GRIK2 CYBB KCNF1 GJB6 RAMP2 GRIN3B SCN9A CNTFR BMP2 IL6R GNGT2 KCNV1 KCNB2 KCNA3 RAMP3 KCNQ5 KCNQ3 NCF4 DMB2 IL18R1 ITGAD DPP6 INHA
Somatodendritic compartment	2.43946	5.08264e-10	64	282	http://amigo.geneontology.org/amigo/term/GO:0036477	TUBB3 KCNA2 CNTN2 GABRA1 DNER P2RX7 GRIA1 ELFN1 TNN EPHA4 GNG13 GNAZ THY1 BRINP1 LRRK2 CD3E HTR2B PRKAR2B CYP17A1 RELN LAMP5 SNAP25 KCNC2 MME SNCA RIN3 PPFIA2 BIN1 PRSS12 UNC5C NTRK2 NCS1 COBL VIP OPRM1 UCH-L1 HCN1 MAP1B NSG1 PENK GRIK2 HTR1B DSCAM GABRA5 GABRG4 ZNF804A GRIN3B ADCY8 MAPK8IP1 PSD2 SLC4A8 GCHFR CALB1 ADGRB1 P3H3 NGFR TMEM108 KLHL14 ASAP1 GRM7 CHL1 SLA PPP3CA
Receptor complex	3.02923	8.73571e-14	62	220	http://amigo.geneontology.org/amigo/term/GO:0043235	ITGB3 GABRA1 RET CALCRL CHRNB4 GRIA1 EPHA4 VIPR1 CHRNA4 FLT4 HTR2C GRIK4 TLR4 CD3E ITGB2 HTR2B CD36 PTPRB VLDLR AHR PLA2R1 LRP1B NTRK2 VWC2 INSRR KCTD8 CHRNA9 PTPN6 SYK IMPG2 GRIK2 EPHA7 FGFR3 HTR1B TLR7 GABRG4 RAMP2 GRIN3B CNTFR BMP2 GABRB3 PTPRN2 IL6R PDGFRB IL31RA LY96 GABRB4 RAMP3 GRM7 KIT FGFR1 NTRK3 IL18R1 nlgn1 GPR37 ITGAD GPR20 PEX5L
External encapsulating structure	2.63053	2.41394e-10	58	237	http://amigo.geneontology.org/amigo/term/GO:0030312	TSKU ADAMTS15 VWA1 MMP28 COL5A1 ADAMTSL2 OPTC MMP2 VTN TNN ECM2 ASPN FBLN2 WNT7A FREM1 COL6A1 GPC4 GPC3 GPC2 CILP KAZALD1 RELN USH2A COL28A1 FBLN5 THBS2 LUM IHH NTN4 MGP VWC2 FBN2 LAMA4 IMPG2 HAPLN1 TINAG VWF ALPL PTX3 TGFBI WISP1 COL5A2 MMP16 ADAMTS2 COL6A2 TNC PTPRZ1 P3H2 ADAMTS9
Extracellular matrix	2.63053	2.41394e-10	58	237	http://amigo.geneontology.org/amigo/term/GO:0031012	TSKU ADAMTS15 VWA1 MMP28 COL5A1 ADAMTSL2 OPTC MMP2 VTN TNN ECM2 ASPN FBLN2 WNT7A FREM1 COL6A1 GPC4 GPC3 GPC2 CILP KAZALD1 RELN USH2A COL28A1 FBLN5 THBS2 LUM IHH NTN4 MGP VWC2 FBN2 LAMA4 IMPG2 HAPLN1 TINAG VWF ALPL PTX3 TGFBI WISP1 COL5A2 MMP16 ADAMTS2 COL6A2 TNC PTPRZ1 P3H2 ADAMTS9
Postsynapse	2.3296	3.10245e-08	57	263	http://amigo.geneontology.org/amigo/term/GO:0098794	CNTN2 GABRB2 GABRA1 C10H15ORF59 LRRTM2 CHRNB2 CHRNB4 P2RX7 GRIA1 CHRNA7 C1QB KCNMA1 EPHA4 CHRNA4 GRIK4 CD3E LRRC4C PRKAR2B NRP2 FLRT3 ADAM22 SNAP25 CNTN1 KCNC2 SNCA PPFIA2 NTRK2 NCS1 SYNE1 CHRNA9 MAP1B NSG1 CPLX1 GRIK2 LRRTM1 ADGRB3 GABRG4 C1QA ZNF804A GABRB3 COL11A2 ADCY8 PSD2 CALB1 GABRB4 ADGRB1 NGFR TMEM108 GRID1 CLSTN2 ASAP1 SLA PPP3CA DCLK1 LOC107054133
Axon	2.54326	5.4708e-09	53	224	http://amigo.geneontology.org/amigo/term/GO:0030424	TUBB3 KCNA2 CNTN2 CRABP-I GRIA1 TRPV2 TNN EPHA4 EPHB1 LRRK2 CYP17A1 CNTN4 NRP2 FLRT3 LAMP5 ADAM22 SNAP25 KCNAB1 MME SNCA RIN3 BIN1 PRSS12 UNC5C PVALB NTRK2 NCS1 COBL OPRM1 UCH-L1 HCN1 CPLX1 PENK NCAM2 LRRTM1 DSCAM PCDH9 ZNF804A PLEKHG5 C1QL1 ADCY8 MAPK8IP1 CALB1 GAD67 NGFR TMEM108 KCNA3 KCNQ3 NTRK3 SYT1
Dendrite	2.79471	2.41394e-10	52	200	http://amigo.geneontology.org/amigo/term/GO:0030425	TUBB3 KCNA2 GABRA1 DNER GRIA1 ELFN1 TNN EPHA4 GNG13 GNAZ THY1 BRINP1 LRRK2 CD3E HTR2B PRKAR2B RELN LAMP5 KCNC2 MME RIN3 PPFIA2 BIN1 PRSS12 UNC5C NTRK2 NCS1 COBL HCN1 MAP1B NSG1 PENK HTR1B DSCAM GABRA5 GABRG4 ZNF804A ADCY8 MAPK8IP1 PSD2 SLC4A8 GCHFR CALB1 ADGRB1 P3H3 NGFR ASAP1 GRM7 CHL1 SLA PPP3CA
Dendritic tree	2.7808	2.69788e-10	52	201	http://amigo.geneontology.org/amigo/term/GO:0097447	TUBB3 KCNA2 GABRA1 DNER GRIA1 ELFN1 TNN EPHA4 GNG13 GNAZ THY1 BRINP1 LRRK2 CD3E HTR2B PRKAR2B RELN LAMP5 KCNC2 MME RIN3 PPFIA2 BIN1 PRSS12 UNC5C NTRK2 NCS1 COBL HCN1 MAP1B NSG1 PENK HTR1B DSCAM GABRA5 GABRG4 ZNF804A ADCY8 MAPK8IP1 PSD2 SLC4A8 GCHFR CALB1 ADGRB1 P3H3 NGFR ASAP1 GRM7 CHL1 SLA PPP3CA
Ion channel complex	2.71883	2.71302e-08	43	170	http://amigo.geneontology.org/amigo/term/GO:0034702	KCNA2 GABRA1 KCNIP1 CHRNB4 CACNA1E KCNS1 GRIA1 KCNB1 KCNMA1 CACNA1D KCNG4 CHRNA4 LOC395944 GRIK4 CACNA1G CACNA1B ANO6 KCNMB4 KCNC2 KCNAB1 DPP10 VWC2 CHRNA9 HCN1 GRIK2 KCNF1 TRPC4 GABRG4 GRIN3B SCN9A GABRB3 CLIC2 KCNV1 KCNB2 GABRB4 KCNA3 KCNQ5 KCNQ3 DPP6
Synaptic membrane	2.86637	2.22499e-08	40	150	http://amigo.geneontology.org/amigo/term/GO:0097060	ITGB3 CNTN2 GABRB2 GABRA1 LRRTM2 CHRNB2 CHRNB4 GRIA1 CHRNA7 KCNMA1 EPHA4 CHRNA4 GRIK4 LRRC4C NRP2 FLRT3 ADAM22 SNAP25 CNTN1 KCNC2 SYNE1 CHRNA9 NSG1 GRIK2 HTR1B LRRTM1 CNTN5 GABRG4 GABRB3 ADCY8 SLC4A8 CALB1 GABRB4 TMEM240 GRID1 CLSTN2 SYT1 LOC107054133
Collagen-containing extracellular matrix	2.80754	3.28658e-07	35	134	http://amigo.geneontology.org/amigo/term/GO:0062023	ADAMTS15 VWA1 COL5A1 MMP2 ECM2 FBLN2 FREM1 GPC4 GPC3 GPC2 CILP KAZALD1 USH2A COL28A1 FBLN5 THBS2 LUM NTN4 MGP VWC2 FBN2 LAMA4 IMPG2 TINAG VWF COL5A2 ADAMTS2 COL6A2 TNC PTPRZ1 P3H2
